# Supplementary material for: HDAC2 inhibits EMT-mediated cancer metastasis by downregulating the long noncoding RNA H19 in colorectal cancer
Source: J Exp Clin Cancer Res. 2020 Dec 2;39:270. doi: 10.1186/s13046-020-01783-9 (PMC7709355; doi:10.1186/s13046-020-01783-9)
Supplement: Supplementary file 2 — Additional file 2. [file 13046_2020_1783_MOESM2_ESM.xlsx]

## Sheet: 394150_workflow_diff_3-coding_g
Probe Set ID	Gene Symbol	Accession Number	Gene Description	Database Source	Mean Signal of Group workflow_chipParse_1	Mean Signal of Group workflow_chipParse_2	d Score	Fold Change	p-value	q-value	Gene Feature
TC6_qbl_hap6000166.hg.1	SLC44A4	NM_001178044	"Homo sapiens solute carrier family 44, member 4 (SLC44A4), transcript variant 2, mRNA."	RefSeq	3.23945	6.35723	-21.4158	-8.68055	9.2e-05	0	down
TC6_apd_hap1000090.hg.1	SLC44A4	NM_001178044	"Homo sapiens solute carrier family 44, member 4 (SLC44A4), transcript variant 2, mRNA."	RefSeq	3.24394	6.16571	-23.0149	-7.57778	8e-05	0	down
TC6_mcf_hap5000151.hg.1	SLC44A4	NM_001178044	"Homo sapiens solute carrier family 44, member 4 (SLC44A4), transcript variant 2, mRNA."	RefSeq	3.24394	6.16571	-23.0149	-7.57778	8e-05	0	down
TC6_ssto_hap7000145.hg.1	SLC44A4	NM_001178044	"Homo sapiens solute carrier family 44, member 4 (SLC44A4), transcript variant 2, mRNA."	RefSeq	3.24394	6.16571	-23.0149	-7.57778	8e-05	0	down
TC06001549.hg.1	SLC44A4	NM_001178044	"Homo sapiens solute carrier family 44, member 4 (SLC44A4), transcript variant 2, mRNA."	RefSeq	3.25819	6.16763	-20.5063	-7.51329	0.000111	0	down
TC6_cox_hap2000176.hg.1	SLC44A4	NM_001178044	"Homo sapiens solute carrier family 44, member 4 (SLC44A4), transcript variant 2, mRNA."	RefSeq	3.25819	6.16763	-20.5063	-7.51329	0.000111	0	down
TC6_dbb_hap3000165.hg.1	SLC44A4	NM_001178044	"Homo sapiens solute carrier family 44, member 4 (SLC44A4), transcript variant 2, mRNA."	RefSeq	3.25819	6.16763	-20.5063	-7.51329	0.000111	0	down
TC13000539.hg.1	HSPH1	NM_006644	"Homo sapiens heat shock 105kDa/110kDa protein 1 (HSPH1), mRNA."	RefSeq	2.75609	5.38831	-23.1358	-6.1998	6.7e-05	0	down
TC17001473.hg.1	KRT20	NM_019010	"Homo sapiens keratin 20 (KRT20), mRNA."	RefSeq	1.58496	3.82934	-18.7038	-4.73831	0.00013	0	down
TC16001050.hg.1	PRSS8	NM_002773	"Homo sapiens protease, serine, 8 (PRSS8), mRNA."	RefSeq	5.42404	7.2647	-6.95121	-3.58175	0.000939	0	down
TC05000702.hg.1	CTNNA1	NM_001903	"Homo sapiens catenin (cadherin-associated protein), alpha 1, 102kDa (CTNNA1), mRNA."	RefSeq	3.24517	4.9045	-20.9161	-3.15869	9.9e-05	0	down
TC19001765.hg.1	KLK7	NM_001207053	"Homo sapiens kallikrein-related peptidase 7 (KLK7), transcript variant 3, mRNA."	RefSeq	1.85135	3.47338	-11.381	-3.07808	0.00022	0	down
TC12001170.hg.1	SLC2A3	NM_006931	"Homo sapiens solute carrier family 2 (facilitated glucose transporter), member 3 (SLC2A3), mRNA."	RefSeq	3.11627	4.72677	-12.0099	-3.05357	0.000188	0	down
TC05001151.hg.1	SEMA5A	NM_003966	"Homo sapiens sema domain, seven thrombospondin repeats (type 1 and type 1-like), transmembrane domain (TM) and short cytoplasmic domain, (semaphorin) 5A (SEMA5A), mRNA."	RefSeq	2.98718	4.51811	-15.9925	-2.88973	0.00015	0	down
TC19001262.hg.1	CYP4F11	NM_001128932	"Homo sapiens cytochrome P450, family 4, subfamily F, polypeptide 11 (CYP4F11), transcript variant 2, mRNA."	RefSeq	2.18562	3.5386	-20.474	-2.55439	0.000124	0	down
TC15000337.hg.1	WDR76	NM_001167941	"Homo sapiens WD repeat domain 76 (WDR76), transcript variant 2, mRNA."	RefSeq	3.88912	5.19024	-11.8398	-2.4642	0.000201	0	down
TC0X000969.hg.1	CASK	NM_001126054	"Homo sapiens calcium/calmodulin-dependent serine protein kinase (MAGUK family) (CASK), transcript variant 2, mRNA."	RefSeq	4.32608	5.5957	-11.6554	-2.41099	0.000213	0	down
TC06001046.hg.1	GPR126	NM_001032394	"Homo sapiens G protein-coupled receptor 126 (GPR126), transcript variant a2, mRNA."	RefSeq	4.29991	5.52246	-9.27205	-2.33358	0.000341	0	down
TC07001182.hg.1	MACC1	NM_182762	"Homo sapiens metastasis associated in colon cancer 1 (MACC1), mRNA."	RefSeq	2.28234	3.40697	-5.78827	-2.18045	0.001741	0	down
TC11000238.hg.1	SAA1	NM_000331	"Homo sapiens serum amyloid A1 (SAA1), transcript variant 1, mRNA."	RefSeq	2.87	3.99144	-9.82701	-2.17564	0.000283	0	down
TC03000534.hg.1	ALCAM	NM_001243280	"Homo sapiens activated leukocyte cell adhesion molecule (ALCAM), transcript variant 2, mRNA."	RefSeq	2.72293	3.80789	-11.1916	-2.12132	0.000232	0	down
TC07000931.hg.1	TMEM139	NM_001242773	"Homo sapiens transmembrane protein 139 (TMEM139), transcript variant 2, mRNA."	RefSeq	3.01191	4.05893	-10.6146	-2.06626	0.000271	0	down
TC11000482.hg.1	FAM111B	NM_001142703	"Homo sapiens family with sequence similarity 111, member B (FAM111B), transcript variant 2, mRNA."	RefSeq	2.72175	3.74906	-4.8782	-2.03822	0.002957	0.001369	down
TC19001085.hg.1	FUT3	NM_000149	"Homo sapiens fucosyltransferase 3 (galactoside 3(4)-L-fucosyltransferase, Lewis blood group) (FUT3), transcript variant 1, mRNA."	RefSeq	3.42659	4.43421	-8.99826	-2.01058	0.000379	0	down
TC07001568.hg.1	SEMA3A	NM_006080	"Homo sapiens sema domain, immunoglobulin domain (Ig), short basic domain, secreted, (semaphorin) 3A (SEMA3A), mRNA."	RefSeq	2.74099	3.71626	-8.86379	-1.96602	0.000404	0	down
TC06002124.hg.1	SLC2A12	NM_145176	"Homo sapiens solute carrier family 2 (facilitated glucose transporter), member 12 (SLC2A12), mRNA."	RefSeq	2.12647	3.09221	-8.03624	-1.95307	0.00057	0	down
TC01001587.hg.1	RGL1	NM_015149	"Homo sapiens ral guanine nucleotide dissociation stimulator-like 1 (RGL1), mRNA."	RefSeq	2.94779	3.90783	-8.31976	-1.94536	0.000493	0	down
TC12000276.hg.1	FAR2	NM_018099	"Homo sapiens fatty acyl CoA reductase 2 (FAR2), transcript variant 2, mRNA."	RefSeq	1.7914	2.72638	-12.4417	-1.91186	0.000181	0	down
TC12000974.hg.1	KNTC1	NM_014708	"Homo sapiens kinetochore associated 1 (KNTC1), mRNA."	RefSeq	3.42525	4.35569	-8.3593	-1.90586	0.000474	0	down
TC06001768.hg.1	CLIC5	NM_001114086	"Homo sapiens chloride intracellular channel 5 (CLIC5), nuclear gene encoding mitochondrial protein, transcript variant 1, mRNA."	RefSeq	1.77676	2.69333	-9.74778	-1.88762	0.00029	0	down
TC7_gl000195_random000003.hg.1	LOC389831	NM_001242480	"Homo sapiens uncharacterized LOC389831 (LOC389831), mRNA."	RefSeq	3.13922	4.0493	-3.25855	-1.87915	0.009188	0.00432	down
TC12000624.hg.1	LGR5	NM_003667	"Homo sapiens leucine-rich repeat containing G protein-coupled receptor 5 (LGR5), transcript variant 1, mRNA."	RefSeq	2.65628	3.5663	-7.54791	-1.87908	0.000691	0	down
TC10001517.hg.1	ANKRD1	NM_014391	"Homo sapiens ankyrin repeat domain 1 (cardiac muscle) (ANKRD1), mRNA."	RefSeq	2.22501	3.13437	-5.54952	-1.87822	0.002008	0	down
TC03002108.hg.1	CLDN1	NM_021101	"Homo sapiens claudin 1 (CLDN1), mRNA."	RefSeq	3.05667	3.9643	-7.06548	-1.87596	0.000888	0	down
TC02002376.hg.1	MCM6	NM_005915	"Homo sapiens minichromosome maintenance complex component 6 (MCM6), mRNA."	RefSeq	5.105	5.9941	-7.29307	-1.85201	0.000799	0	down
TC15000846.hg.1	FANCI	NM_001113378	"Homo sapiens Fanconi anemia, complementation group I (FANCI), transcript variant 1, mRNA."	RefSeq	4.34868	5.22464	-8.17067	-1.83523	0.000532	0	down
TC20000592.hg.1	PCNA	NM_002592	"Homo sapiens proliferating cell nuclear antigen (PCNA), transcript variant 1, mRNA."	RefSeq	5.63651	6.50464	-7.2429	-1.8253	0.000818	0	down
TC10000673.hg.1	HELLS	NM_018063	"Homo sapiens helicase, lymphoid-specific (HELLS), mRNA."	RefSeq	2.77745	3.63932	-5.92975	-1.81739	0.001607	0	down
TC6_cox_hap2000079.hg.1	HSPA1B	NM_005346	"Homo sapiens heat shock 70kDa protein 1B (HSPA1B), mRNA."	RefSeq	4.6982	5.55623	-5.08551	-1.81256	0.002645	0.001369	down
TC6_dbb_hap3000070.hg.1	HSPA1B	NM_005346	"Homo sapiens heat shock 70kDa protein 1B (HSPA1B), mRNA."	RefSeq	4.59519	5.43878	-5.39599	-1.7945	0.002199	0	down
TC6_qbl_hap6000070.hg.1	HSPA1B	NM_005346	"Homo sapiens heat shock 70kDa protein 1B (HSPA1B), mRNA."	RefSeq	4.8033	5.64298	-5.46938	-1.78966	0.002078	0	down
TC11003478.hg.1	SAA2	NM_001127380	"Homo sapiens serum amyloid A2 (SAA2), transcript variant 2, mRNA."	RefSeq	1.93575	2.77306	-7.3902	-1.78672	0.000761	0	down
TC02001878.hg.1	FANCL	NM_001114636	"Homo sapiens Fanconi anemia, complementation group L (FANCL), transcript variant 1, mRNA."	RefSeq	3.58254	4.41861	-4.27076	-1.78519	0.004427	0.001624	down
TC11002390.hg.1	HSPA8	NM_006597	"Homo sapiens heat shock 70kDa protein 8 (HSPA8), transcript variant 1, mRNA."	RefSeq	8.52936	9.36316	-5.42135	-1.78238	0.002148	0	down
TC6_apd_hap1000040.hg.1	HSPA1B	NM_005346	"Homo sapiens heat shock 70kDa protein 1B (HSPA1B), mRNA."	RefSeq	4.53878	5.37137	-5.47799	-1.78088	0.002066	0	down
TC09000498.hg.1	GALNT12	NM_024642	"Homo sapiens UDP-N-acetyl-alpha-D-galactosamine:polypeptide N-acetylgalactosaminyltransferase 12 (GalNAc-T12) (GALNT12), mRNA."	RefSeq	4.96996	5.79624	-4.37223	-1.7731	0.004134	0.001369	down
TC06001799.hg.1	MCM3	NM_002388	"Homo sapiens minichromosome maintenance complex component 3 (MCM3), transcript variant 1, mRNA."	RefSeq	5.04503	5.8589	-7.94613	-1.75792	0.000602	0	down
TC09000526.hg.1	SMC2	NM_001042550	"Homo sapiens structural maintenance of chromosomes 2 (SMC2), transcript variant 1, mRNA."	RefSeq	3.72572	4.53198	-5.57773	-1.74868	0.00197	0	down
TC14001154.hg.1	WDHD1	NM_001008396	"Homo sapiens WD repeat and HMG-box DNA binding protein 1 (WDHD1), transcript variant 2, mRNA."	RefSeq	4.0661	4.87134	-8.0159	-1.74744	0.000582	0	down
TC03001629.hg.1	CD47	NM_001777	"Homo sapiens CD47 molecule (CD47), transcript variant 1, mRNA."	RefSeq	4.05455	4.8535	-9.64313	-1.73984	0.000302	0	down
TC05001481.hg.1	ENC1	NM_003633	"Homo sapiens ectodermal-neural cortex 1 (with BTB domain) (ENC1), transcript variant 1, mRNA."	RefSeq	3.75224	4.54744	-8.07994	-1.73532	0.000551	0	down
TC01000292.hg.1	KDM1A	NM_001009999	"Homo sapiens lysine (K)-specific demethylase 1A (KDM1A), transcript variant 1, mRNA."	RefSeq	6.54638	7.33856	-10.8579	-1.73169	0.000245	0	down
TC17001769.hg.1	BRIP1	NM_032043	"Homo sapiens BRCA1 interacting protein C-terminal helicase 1 (BRIP1), mRNA."	RefSeq	3.04085	3.82646	-5.7027	-1.72382	0.001817	0	down
TC0Y000182.hg.1	CD24	NM_013230	"Homo sapiens CD24 molecule (CD24), mRNA."	RefSeq	3.41245	4.19694	-3.61695	-1.72249	0.007005	0.002462	down
TC04000313.hg.1	KIT	NM_000222	"Homo sapiens v-kit Hardy-Zuckerman 4 feline sarcoma viral oncogene homolog (KIT), transcript variant 1, mRNA."	RefSeq	5.93417	6.71842	-7.1584	-1.7222	0.000831	0	down
TC10000098.hg.1	MCM10	NM_018518	"Homo sapiens minichromosome maintenance complex component 10 (MCM10), transcript variant 2, mRNA."	RefSeq	3.23929	4.01738	-8.45207	-1.71486	0.000449	0	down
TC01002627.hg.1	PDZK1IP1	NM_005764	"Homo sapiens PDZK1 interacting protein 1 (PDZK1IP1), mRNA."	RefSeq	2.65985	3.43608	-6.88035	-1.71265	0.000971	0	down
TC05001513.hg.1	AP3B1	NM_003664	"Homo sapiens adaptor-related protein complex 3, beta 1 subunit (AP3B1), transcript variant 1, mRNA."	RefSeq	4.18932	4.94522	-6.42457	-1.68868	0.001244	0	down
TC04000590.hg.1	UGT8	NM_001128174	"Homo sapiens UDP glycosyltransferase 8 (UGT8), transcript variant 1, mRNA."	RefSeq	4.04467	4.79957	-5.95691	-1.68752	0.001595	0	down
TC06000796.hg.1	PM20D2	NM_001010853	"Homo sapiens peptidase M20 domain containing 2 (PM20D2), mRNA."	RefSeq	3.00295	3.75632	-4.79881	-1.68573	0.003071	0.001369	down
TC01002694.hg.1	DHCR24	NM_014762	"Homo sapiens 24-dehydrocholesterol reductase (DHCR24), mRNA."	RefSeq	5.73707	6.48845	-5.18523	-1.6834	0.00246	0	down
TC15001510.hg.1	VPS13C	NM_001018088	"Homo sapiens vacuolar protein sorting 13 homolog C (S. cerevisiae) (VPS13C), transcript variant 2B, mRNA."	RefSeq	3.04426	3.79492	-3.64177	-1.68257	0.006846	0.002462	down
TC17000362.hg.1	NF1	NM_000267	"Homo sapiens neurofibromin 1 (NF1), transcript variant 2, mRNA."	RefSeq	5.43077	6.17841	-5.70882	-1.67905	0.001798	0	down
TC14001387.hg.1	GALC	NM_000153	"Homo sapiens galactosylceramidase (GALC), transcript variant 1, mRNA."	RefSeq	4.26276	5.00232	-7.72818	-1.66966	0.00064	0	down
TC08000346.hg.1	MCM4	NM_005914	"Homo sapiens minichromosome maintenance complex component 4 (MCM4), transcript variant 1, mRNA."	RefSeq	4.91535	5.65146	-9.52195	-1.66567	0.000321	0	down
TC01001767.hg.1	DTL	NM_016448	"Homo sapiens denticleless E3 ubiquitin protein ligase homolog (Drosophila) (DTL), mRNA."	RefSeq	4.73869	5.4729	-8.84666	-1.66349	0.000411	0	down
TC03001919.hg.1	DHX36	NM_001114397	"Homo sapiens DEAH (Asp-Glu-Ala-His) box polypeptide 36 (DHX36), transcript variant 2, mRNA."	RefSeq	3.47855	4.21148	-5.46372	-1.66201	0.002085	0	down
TC17000495.hg.1	CDC6	NM_001254	"Homo sapiens cell division cycle 6 (CDC6), mRNA."	RefSeq	4.66706	5.3997	-9.37735	-1.66168	0.000334	0	down
TC12000189.hg.1	EMP1	NM_001423	"Homo sapiens epithelial membrane protein 1 (EMP1), mRNA."	RefSeq	5.1113	5.83507	-2.90373	-1.65149	0.012651	0.007304	down
TC09000335.hg.1	ANXA1	NM_000700	"Homo sapiens annexin A1 (ANXA1), mRNA."	RefSeq	5.60465	6.32708	-5.61073	-1.64996	0.001945	0	down
TC15000028.hg.1	CYFIP1	NM_001033028	"Homo sapiens cytoplasmic FMR1 interacting protein 1 (CYFIP1), transcript variant 2, mRNA."	RefSeq	5.41172	6.13284	-7.37254	-1.64846	0.00078	0	down
TC06000132.hg.1	CDKAL1	NM_017774	"Homo sapiens CDK5 regulatory subunit associated protein 1-like 1 (CDKAL1), mRNA."	RefSeq	2.82888	3.54834	-4.60117	-1.64656	0.003523	0.001369	down
TC06001059.hg.1	UTRN	NM_007124	"Homo sapiens utrophin (UTRN), mRNA."	RefSeq	3.03566	3.75408	-4.03381	-1.64538	0.005146	0.001624	down
TC09000330.hg.1	GDA	NM_001242505	"Homo sapiens guanine deaminase (GDA), transcript variant 1, mRNA."	RefSeq	5.84912	6.56451	-4.92751	-1.64193	0.002855	0.001369	down
TC20000076.hg.1	PLCB4	NM_000933	"Homo sapiens phospholipase C, beta 4 (PLCB4), transcript variant 1, mRNA."	RefSeq	3.76845	4.48076	-3.97952	-1.63843	0.005286	0.001624	down
TC12000207.hg.1	MGST1	NM_020300	"Homo sapiens microsomal glutathione S-transferase 1 (MGST1), transcript variant 2, mRNA."	RefSeq	1.58496	2.29514	-13.5025	-1.63601	0.000162	0	down
TC08001584.hg.1	ATAD2	NM_014109	"Homo sapiens ATPase family, AAA domain containing 2 (ATAD2), mRNA."	RefSeq	4.64137	5.34793	-5.19157	-1.63192	0.002447	0	down
TC05001996.hg.1	RNF145	NM_144726	"Homo sapiens ring finger protein 145 (RNF145), transcript variant 2, mRNA."	RefSeq	4.431	5.13741	-6.43424	-1.63174	0.001238	0	down
TC02002830.hg.1	IRS1	NM_005544	"Homo sapiens insulin receptor substrate 1 (IRS1), mRNA."	RefSeq	5.03935	5.74425	-2.87432	-1.63003	0.013046	0.007304	down
TC01002803.hg.1	FUBP1	NM_003902	"Homo sapiens far upstream element (FUSE) binding protein 1 (FUBP1), mRNA."	RefSeq	3.25309	3.95459	-7.72283	-1.62619	0.000646	0	down
TC11002211.hg.1	MAML2	NM_032427	"Homo sapiens mastermind-like 2 (Drosophila) (MAML2), mRNA."	RefSeq	1.97965	2.67893	-5.35961	-1.62369	0.002231	0	down
TC11001478.hg.1	E2F8	NM_001256371	"Homo sapiens E2F transcription factor 8 (E2F8), transcript variant 2, mRNA."	RefSeq	3.83024	4.52534	-6.61867	-1.619	0.001098	0	down
TC16000559.hg.1	CDH1	NM_004360	"Homo sapiens cadherin 1, type 1, E-cadherin (epithelial) (CDH1), mRNA."	RefSeq	8.29204	8.98657	-10.2407	-1.61836	0.000277	0	down
TC11001407.hg.1	SBF2	NM_030962	"Homo sapiens SET binding factor 2 (SBF2), mRNA."	RefSeq	4.79711	5.48435	-6.32712	-1.6102	0.001327	0	down
TC17000246.hg.1	ALDH3A2	NM_000382	"Homo sapiens aldehyde dehydrogenase 3 family, member A2 (ALDH3A2), transcript variant 2, mRNA."	RefSeq	5.33126	6.01703	-6.77773	-1.60856	0.001034	0	down
TC03001487.hg.1	FAM208A	NM_001112736	"Homo sapiens family with sequence similarity 208, member A (FAM208A), transcript variant 1, mRNA."	RefSeq	3.82898	4.51165	-6.73064	-1.60511	0.001066	0	down
TC10000918.hg.1	DOCK1	NM_001380	"Homo sapiens dedicator of cytokinesis 1 (DOCK1), mRNA."	RefSeq	4.03903	4.71564	-8.32884	-1.59838	0.000487	0	down
TC14002306.hg.1	UBR7	NM_175748	"Homo sapiens ubiquitin protein ligase E3 component n-recognin 7 (putative) (UBR7), transcript variant 2, mRNA."	RefSeq	3.36375	4.0362	-4.55146	-1.59378	0.003682	0.001369	down
TC11002162.hg.1	SYTL2	NM_001162951	"Homo sapiens synaptotagmin-like 2 (SYTL2), transcript variant g, mRNA."	RefSeq	3.30075	3.96953	-6.11533	-1.58974	0.001499	0	down
TC11001851.hg.1	DDB1	NM_001923	"Homo sapiens damage-specific DNA binding protein 1, 127kDa (DDB1), mRNA."	RefSeq	5.69104	6.35812	-8.38785	-1.58786	0.000468	0	down
TC15001287.hg.1	MFAP1	NM_005926	"Homo sapiens microfibrillar-associated protein 1 (MFAP1), mRNA."	RefSeq	2.22878	2.89499	-12.6938	-1.58689	0.000175	0	down
TC13000701.hg.1	DIAPH3	NM_030932	"Homo sapiens diaphanous homolog 3 (Drosophila) (DIAPH3), transcript variant 2, mRNA."	RefSeq	3.0514	3.71272	-5.69913	-1.58153	0.00183	0	down
TC02000104.hg.1	VSNL1	NM_003385	"Homo sapiens visinin-like 1 (VSNL1), mRNA."	RefSeq	2.69935	3.36007	-8.65772	-1.58087	0.000417	0	down
TC01000494.hg.1	KIAA0754	NM_015038	"Homo sapiens KIAA0754 (KIAA0754), mRNA."	RefSeq	2.00156	2.66194	-4.67454	-1.5805	0.003351	0.001369	down
TC01002845.hg.1	GBP3	NM_018284	"Homo sapiens guanylate binding protein 3 (GBP3), mRNA."	RefSeq	3.23913	3.89796	-3.71189	-1.5788	0.006489	0.002462	down
TC04001152.hg.1	ATP8A1	NM_001105529	"Homo sapiens ATPase, aminophospholipid transporter (APLT), class I, type 8A, member 1 (ATP8A1), transcript variant 2, mRNA."	RefSeq	2.84736	3.50416	-6.8103	-1.57658	0.001022	0	down
TC03000461.hg.1	CHMP2B	NM_001244644	"Homo sapiens charged multivesicular body protein 2B (CHMP2B), transcript variant 2, mRNA."	RefSeq	4.89443	5.54343	-6.89197	-1.56807	0.000964	0	down
TC12003239.hg.1	SLCO1B3	NM_019844	"Homo sapiens solute carrier organic anion transporter family, member 1B3 (SLCO1B3), mRNA."	RefSeq	3.31725	3.96568	-6.99155	-1.56747	0.000926	0	down
TC02002504.hg.1	STK39	NM_013233	"Homo sapiens serine threonine kinase 39 (STK39), mRNA."	RefSeq	4.43539	5.08356	-8.19614	-1.56717	0.000525	0	down
TC03000569.hg.1	C3orf52	NM_001171747	"Homo sapiens chromosome 3 open reading frame 52 (C3orf52), transcript variant 1, mRNA."	RefSeq	1.98118	2.62619	-9.61124	-1.56376	0.000315	0	down
TC11000622.hg.1	POLA2	NM_002689	"Homo sapiens polymerase (DNA directed), alpha 2, accessory subunit (POLA2), mRNA."	RefSeq	3.70216	4.34659	-7.00265	-1.56313	0.00092	0	down
TC12001619.hg.1	TMEM194A	NM_001130963	"Homo sapiens transmembrane protein 194A (TMEM194A), transcript variant 1, mRNA."	RefSeq	5.81177	6.45457	-7.43584	-1.56136	0.000748	0	down
TC06000675.hg.1	FAM83B	NM_001010872	"Homo sapiens family with sequence similarity 83, member B (FAM83B), mRNA."	RefSeq	3.31386	3.95457	-5.65362	-1.5591	0.001887	0	down
TC04000828.hg.1	MSMO1	NM_001017369	"Homo sapiens methylsterol monooxygenase 1 (MSMO1), transcript variant 2, mRNA."	RefSeq	4.5903	5.22737	-6.79062	-1.55517	0.001028	0	down
TC15001454.hg.1	MYO5C	NM_018728	"Homo sapiens myosin VC (MYO5C), mRNA."	RefSeq	3.27334	3.90998	-4.59728	-1.55471	0.003536	0.001369	down
TC01000818.hg.1	CYR61	NM_001554	"Homo sapiens cysteine-rich, angiogenic inducer, 61 (CYR61), mRNA."	RefSeq	3.97062	4.60709	-6.17099	-1.55452	0.001442	0	down
TC17001731.hg.1	SUPT4H1	NM_003168	"Homo sapiens suppressor of Ty 4 homolog 1 (S. cerevisiae) (SUPT4H1), transcript variant 1, mRNA."	RefSeq	7.44736	8.08194	-8.09931	-1.55248	0.000544	0	down
TC08001438.hg.1	CCNE2	NM_057749	"Homo sapiens cyclin E2 (CCNE2), mRNA."	RefSeq	1.72886	2.36314	-5.56506	-1.55217	0.001989	0	down
TC02002098.hg.1	LOC100996862	ENST00000295246	cdna:known chromosome:GRCh37:2:96541715:96592977:-1 gene:ENSG00000174501 gene_biotype:protein_coding transcript_biotype:protein_coding	ENSEMBL	3.3267	3.96081	-3.0879	-1.55198	0.010627	0.007304	down
TC11002473.hg.1	NCAPD3	NM_015261	"Homo sapiens non-SMC condensin II complex, subunit D3 (NCAPD3), mRNA."	RefSeq	4.68735	5.32107	-7.44495	-1.55156	0.000742	0	down
TC08000209.hg.1	SCARA3	NM_016240	"Homo sapiens scavenger receptor class A, member 3 (SCARA3), transcript variant 1, mRNA."	RefSeq	4.32193	4.95401	-4.50617	-1.5498	0.003765	0.001369	down
TC17001770.hg.1	INTS2	NM_020748	"Homo sapiens integrator complex subunit 2 (INTS2), transcript variant 1, mRNA."	RefSeq	4.08956	4.71972	-5.46014	-1.54773	0.002097	0	down
TC02002745.hg.1	BARD1	NM_000465	"Homo sapiens BRCA1 associated RING domain 1 (BARD1), mRNA."	RefSeq	3.01922	3.64855	-5.56414	-1.54685	0.001996	0	down
TC06000658.hg.1	TMEM14A	NM_014051	"Homo sapiens transmembrane protein 14A (TMEM14A), mRNA."	RefSeq	4.72278	5.3509	-6.21351	-1.54555	0.00141	0	down
TC20000341.hg.1	PI3	NM_002638	"Homo sapiens peptidase inhibitor 3, skin-derived (PI3), mRNA."	RefSeq	2.60236	3.22839	-4.22705	-1.54331	0.004548	0.001624	down
TC07000093.hg.1	TMEM106B	NM_001134232	"Homo sapiens transmembrane protein 106B (TMEM106B), transcript variant 2, mRNA."	RefSeq	4.56763	5.19126	-6.63192	-1.54075	0.001092	0	down
TC02002733.hg.1	LANCL1	NM_006055	"Homo sapiens LanC lantibiotic synthetase component C-like 1 (bacterial) (LANCL1), transcript variant 1, mRNA."	RefSeq	4.0043	4.62603	-9.37774	-1.53872	0.000328	0	down
TC01002578.hg.1	SLC2A1	NM_006516	"Homo sapiens solute carrier family 2 (facilitated glucose transporter), member 1 (SLC2A1), mRNA."	RefSeq	7.71927	8.34095	-3.92786	-1.53867	0.005496	0.001624	down
TC22000791.hg.1	DDX17	NM_001098504	"Homo sapiens DEAD (Asp-Glu-Ala-Asp) box helicase 17 (DDX17), transcript variant 3, mRNA."	RefSeq	6.73024	7.35159	-6.86643	-1.53831	0.000983	0	down
TC06000385.hg.1	HSPA1B	NM_005346	"Homo sapiens heat shock 70kDa protein 1B (HSPA1B), mRNA."	RefSeq	4.48326	5.10267	-3.79234	-1.53625	0.005974	0.002462	down
TC12001726.hg.1	ZFC3H1	NM_144982	"Homo sapiens zinc finger, C3H1-type containing (ZFC3H1), mRNA."	RefSeq	3.22	3.83887	-4.19974	-1.53567	0.004631	0.001624	down
TC16001269.hg.1	RFWD3	NM_018124	"Homo sapiens ring finger and WD repeat domain 3 (RFWD3), mRNA."	RefSeq	4.73284	5.3463	-8.41467	-1.52992	0.000461	0	down
TC17001632.hg.1	PRR15L	NM_024320	"Homo sapiens proline rich 15-like (PRR15L), mRNA."	RefSeq	4.7433	5.35673	-3.64674	-1.5299	0.006827	0.002462	down
TC07001582.hg.1	STEAP4	NM_001205315	"Homo sapiens STEAP family member 4 (STEAP4), transcript variant 2, mRNA."	RefSeq	1.64718	2.25911	-6.89785	-1.5283	0.000958	0	down
TC16000225.hg.1	LOC81691	NM_001144924	"Homo sapiens exonuclease NEF-sp (LOC81691), transcript variant 2, mRNA."	RefSeq	2.13549	2.74614	-9.0318	-1.52695	0.000372	0	down
TC13000286.hg.1	LMO7	NM_005358	"Homo sapiens LIM domain 7 (LMO7), transcript variant 1, mRNA."	RefSeq	2.60185	3.21191	-5.31309	-1.52633	0.002288	0	down
TC11002254.hg.1	MSANTD4	NM_032424	"Homo sapiens Myb/SANT-like DNA-binding domain containing 4 with coiled-coils (MSANTD4), mRNA."	RefSeq	1.64343	2.25273	-5.20353	-1.52552	0.002441	0	down
TC11002268.hg.1	KDELC2	NM_153705	"Homo sapiens KDEL (Lys-Asp-Glu-Leu) containing 2 (KDELC2), mRNA."	RefSeq	3.95535	4.56186	-4.03883	-1.52256	0.005127	0.001624	down
TC12001296.hg.1	RECQL	NM_002907	"Homo sapiens RecQ protein-like (DNA helicase Q1-like) (RECQL), transcript variant 1, mRNA."	RefSeq	3.59842	4.20045	-6.03161	-1.51785	0.001544	0	down
TC21000154.hg.1	CHAF1B	NM_005441	"Homo sapiens chromatin assembly factor 1, subunit B (p60) (CHAF1B), mRNA."	RefSeq	5.5325	6.13298	-4.58031	-1.51622	0.003612	0.001369	down
TC02000589.hg.1	ANKRD36	NM_001164315	"Homo sapiens ankyrin repeat domain 36 (ANKRD36), mRNA."	RefSeq	3.37641	3.96997	-2.84371	-1.50896	0.013466	0.007304	down
TC18000423.hg.1	SS18	NM_001007559	"Homo sapiens synovial sarcoma translocation, chromosome 18 (SS18), transcript variant 1, mRNA."	RefSeq	4.99794	5.59012	-4.42981	-1.50752	0.003988	0.001369	down
TC12001168.hg.1	SLC2A14	NM_153449	"Homo sapiens solute carrier family 2 (facilitated glucose transporter), member 14 (SLC2A14), mRNA."	RefSeq	2.29589	2.88752	-8.47199	-1.50694	0.000442	0	down
TC11002269.hg.1	EXPH5	NM_015065	"Homo sapiens exophilin 5 (EXPH5), mRNA."	RefSeq	4.13025	4.71718	-4.259	-1.50204	0.004465	0.001624	down
TC20000063.hg.1	MCM8	NM_032485	"Homo sapiens minichromosome maintenance complex component 8 (MCM8), transcript variant 1, mRNA."	RefSeq	3.91519	4.50005	-8.63875	-1.49989	0.000423	0	down
TC19000229.hg.1	RNASEH2A	NM_006397	"Homo sapiens ribonuclease H2, subunit A (RNASEH2A), mRNA."	RefSeq	5.64581	6.22931	-5.15837	-1.49848	0.002524	0	down
TC19001367.hg.1	ZNF91	NM_003430	"Homo sapiens zinc finger protein 91 (ZNF91), mRNA."	RefSeq	4.36514	4.94667	-3.87084	-1.49644	0.0057	0.002462	down
TC02001238.hg.1	MAP2	NM_001039538	"Homo sapiens microtubule-associated protein 2 (MAP2), transcript variant 5, mRNA."	RefSeq	1.77594	2.35599	-7.14168	-1.4949	0.000856	0	down
TC18000156.hg.1	PIK3C3	NM_002647	"Homo sapiens phosphatidylinositol 3-kinase, catalytic subunit type 3 (PIK3C3), mRNA."	RefSeq	2.65738	3.23567	-4.78043	-1.49307	0.003103	0.001369	down
TC05000701.hg.1	EGR1	NM_001964	"Homo sapiens early growth response 1 (EGR1), mRNA."	RefSeq	5.44051	6.01677	-3.38829	-1.49097	0.008348	0.00432	down
TC12001614.hg.1	PRIM1	NM_000946	"Homo sapiens primase, DNA, polypeptide 1 (49kDa) (PRIM1), mRNA."	RefSeq	5.21271	5.78691	-5.48942	-1.48885	0.002053	0	down
TC05001362.hg.1	DHX29	NM_019030	"Homo sapiens DEAH (Asp-Glu-Ala-His) box polypeptide 29 (DHX29), mRNA."	RefSeq	2.53281	3.10643	-4.07355	-1.48826	0.005019	0.001624	down
TC01000931.hg.1	FAM102B	NM_001010883	"Homo sapiens family with sequence similarity 102, member B (FAM102B), mRNA."	RefSeq	3.43629	4.00896	-5.01625	-1.48727	0.002721	0.001369	down
TC06001295.hg.1	NUP153	NM_005124	"Homo sapiens nucleoporin 153kDa (NUP153), mRNA."	RefSeq	5.65298	6.22445	-4.60236	-1.48603	0.003517	0.001369	down
TC02000295.hg.1	MSH2	NM_000251	"Homo sapiens mutS homolog 2, colon cancer, nonpolyposis type 1 (E. coli) (MSH2), transcript variant 1, mRNA."	RefSeq	5.31977	5.88881	-5.69433	-1.48354	0.001849	0	down
TC06002189.hg.1	PLAGL1	NM_001080951	"Homo sapiens pleiomorphic adenoma gene-like 1 (PLAGL1), transcript variant 3, mRNA."	RefSeq	2.73663	3.30524	-11.203	-1.4831	0.000226	0	down
TC09002880.hg.1	MTAP	NM_002451	"Homo sapiens methylthioadenosine phosphorylase (MTAP), mRNA."	RefSeq	3.78804	4.35517	-6.2564	-1.48157	0.001372	0	down
TC01002500.hg.1	CLSPN	NM_001190481	"Homo sapiens claspin (CLSPN), transcript variant 2, mRNA."	RefSeq	2.53805	3.10297	-4.8097	-1.47931	0.003065	0.001369	down
TC04001283.hg.1	CXCL5	NM_002994	"Homo sapiens chemokine (C-X-C motif) ligand 5 (CXCL5), mRNA."	RefSeq	7.4721	8.03552	-2.87041	-1.47776	0.013097	0.007304	down
TC20000829.hg.1	TTI1	NM_014657	"Homo sapiens TELO2 interacting protein 1 (TTI1), mRNA."	RefSeq	4.62301	5.18591	-2.87849	-1.47724	0.013008	0.007304	down
TC0X000357.hg.1	HEPH	NM_001130860	"Homo sapiens hephaestin (HEPH), transcript variant 3, mRNA."	RefSeq	1.58496	2.14706	-10.6177	-1.47642	0.000264	0	down
TC09001547.hg.1	STOM	NM_004099	"Homo sapiens stomatin (STOM), transcript variant 1, mRNA."	RefSeq	2.64006	3.20018	-4.59141	-1.4744	0.003555	0.001369	down
TC18000436.hg.1	DSC2	NM_004949	"Homo sapiens desmocollin 2 (DSC2), transcript variant Dsc2b, mRNA."	RefSeq	2.33077	2.88985	-5.1834	-1.47332	0.002479	0	down
TC12001435.hg.1	RPAP3	NM_001146075	"Homo sapiens RNA polymerase II associated protein 3 (RPAP3), transcript variant 2, mRNA."	RefSeq	3.69124	4.25008	-5.69443	-1.47308	0.001843	0	down
TC03003340.hg.1	CPOX	NM_000097	"Homo sapiens coproporphyrinogen oxidase (CPOX), mRNA."	RefSeq	4.83674	5.39457	-5.18506	-1.47205	0.002467	0	down
TC12000076.hg.1	CD9	NM_001769	"Homo sapiens CD9 molecule (CD9), mRNA."	RefSeq	6.99135	7.54772	-3.24228	-1.47057	0.009335	0.00432	down
TC10000377.hg.1	ARID5B	NM_001244638	"Homo sapiens AT rich interactive domain 5B (MRF1-like) (ARID5B), transcript variant 2, mRNA."	RefSeq	3.3744	3.92867	-5.69743	-1.46842	0.001836	0	down
TC04001425.hg.1	PPP3CA	NM_000944	"Homo sapiens protein phosphatase 3, catalytic subunit, alpha isozyme (PPP3CA), transcript variant 1, mRNA."	RefSeq	5.15716	5.71142	-6.5697	-1.46842	0.001117	0	down
TC15000609.hg.1	RAB11A	NM_001206836	"Homo sapiens RAB11A, member RAS oncogene family (RAB11A), transcript variant 2, mRNA."	RefSeq	7.00293	7.55538	-6.73517	-1.46658	0.001053	0	down
TC05000257.hg.1	FKSG52	ENST00000412930	cdna:known chromosome:GRCh37:5:59726565:59726939:1 gene:ENSG00000224838 gene_biotype:protein_coding transcript_biotype:protein_coding	ENSEMBL	7.64345	8.19427	-3.48865	-1.46492	0.007731	0.00432	down
TC03000197.hg.1	WDR48	NM_020839	"Homo sapiens WD repeat domain 48 (WDR48), mRNA."	RefSeq	3.01267	3.56333	-4.09146	-1.46476	0.00493	0.001624	down
TC01000575.hg.1	NASP	NM_001195193	"Homo sapiens nuclear autoantigenic sperm protein (histone-binding) (NASP), transcript variant 4, mRNA."	RefSeq	4.91848	5.467	-5.36291	-1.46258	0.002225	0	down
TC18000175.hg.1	LIPG	NM_006033	"Homo sapiens lipase, endothelial (LIPG), mRNA."	RefSeq	3.28901	3.83432	-4.16143	-1.45933	0.004771	0.001624	down
TC17001924.hg.1	LGALS3BP	NM_005567	"Homo sapiens lectin, galactoside-binding, soluble, 3 binding protein (LGALS3BP), mRNA."	RefSeq	5.69482	6.23987	-3.0582	-1.45907	0.010888	0.007304	down
TC07000843.hg.1	NUP205	NM_015135	"Homo sapiens nucleoporin 205kDa (NUP205), mRNA."	RefSeq	3.98834	4.53223	-4.25941	-1.4579	0.004453	0.001624	down
TC06001762.hg.1	NFKBIE	NM_004556	"Homo sapiens nuclear factor of kappa light polypeptide gene enhancer in B-cells inhibitor, epsilon (NFKBIE), mRNA."	RefSeq	3.2704	3.81274	-6.05453	-1.45634	0.001525	0	down
TC01001664.hg.1	IPO9	NM_018085	"Homo sapiens importin 9 (IPO9), mRNA."	RefSeq	5.48963	6.0313	-5.6329	-1.45566	0.001919	0	down
TC16000214.hg.1	TMC5	NM_001105248	"Homo sapiens transmembrane channel-like 5 (TMC5), transcript variant 1, mRNA."	RefSeq	3.14547	3.68565	-5.25826	-1.45415	0.002409	0	down
TC14001124.hg.1	PYGL	NM_001163940	"Homo sapiens phosphorylase, glycogen, liver (PYGL), transcript variant 2, mRNA."	RefSeq	2.62945	3.16718	-6.36562	-1.45169	0.001283	0	down
TC02001556.hg.1	MBOAT2	NM_138799	"Homo sapiens membrane bound O-acyltransferase domain containing 2 (MBOAT2), mRNA."	RefSeq	2.71764	3.25312	-6.24465	-1.44943	0.001391	0	down
TC01000548.hg.1	PTPRF	NM_002840	"Homo sapiens protein tyrosine phosphatase, receptor type, F (PTPRF), transcript variant 1, mRNA."	RefSeq	5.59929	6.13264	-4.45699	-1.44728	0.00395	0.001369	down
TC14001107.hg.1		ENST00000358799	cdna:novel chromosome:GRCh37:14:50300810:50311552:-1 gene:ENSG00000197502 gene_biotype:protein_coding transcript_biotype:protein_coding	ENSEMBL	3.2629	3.79617	-1.67248	-1.44721	0.059252	0.064129	down
TC02001009.hg.1	UBR3	NM_172070	"Homo sapiens ubiquitin protein ligase E3 component n-recognin 3 (putative) (UBR3), mRNA."	RefSeq	3.81257	4.34536	-4.05608	-1.44673	0.005057	0.001624	down
TC04000469.hg.1	PTPN13	NM_006264	"Homo sapiens protein tyrosine phosphatase, non-receptor type 13 (APO-1/CD95 (Fas)-associated phosphatase) (PTPN13), transcript variant 2, mRNA."	RefSeq	4.57249	5.10486	-3.65889	-1.44631	0.006744	0.002462	down
TC12001227.hg.1	YBX3	NM_001145426	"Homo sapiens Y box binding protein 3 (YBX3), transcript variant 2, mRNA."	RefSeq	6.63104	7.16315	-7.056	-1.44604	0.000901	0	down
TC03001071.hg.1	HES1	NM_005524	"Homo sapiens hairy and enhancer of split 1, (Drosophila) (HES1), mRNA."	RefSeq	5.38998	5.92185	-7.52656	-1.4458	0.000703	0	down
TC17000918.hg.1	RNF213	NM_001256071	"Homo sapiens ring finger protein 213 (RNF213), transcript variant 3, mRNA."	RefSeq	4.70603	5.23751	-7.62957	-1.44541	0.000665	0	down
TC01002942.hg.1	SLC25A24	NM_013386	"Homo sapiens solute carrier family 25 (mitochondrial carrier; phosphate carrier), member 24 (SLC25A24), nuclear gene encoding mitochondrial protein, transcript variant 1, mRNA."	RefSeq	5.56237	6.09109	-7.2743	-1.44264	0.000805	0	down
TC08001264.hg.1	ASPH	NM_001164750	"Homo sapiens aspartate beta-hydroxylase (ASPH), transcript variant 6, mRNA."	RefSeq	4.31585	4.8425	-6.16143	-1.44059	0.001454	0	down
TC14001534.hg.1	CDC42BPB	NM_006035	"Homo sapiens CDC42 binding protein kinase beta (DMPK-like) (CDC42BPB), mRNA."	RefSeq	5.39288	5.91943	-7.32595	-1.44048	0.000792	0	down
TC02001347.hg.1	SGPP2	NM_152386	"Homo sapiens sphingosine-1-phosphate phosphatase 2 (SGPP2), mRNA."	RefSeq	4.58058	5.10682	-7.05458	-1.44017	0.000907	0	down
TC03001695.hg.1	POLQ	NM_199420	"Homo sapiens polymerase (DNA directed), theta (POLQ), mRNA."	RefSeq	2.35455	2.87954	-5.31644	-1.43893	0.002269	0	down
TC11002293.hg.1	IL18	NM_001562	"Homo sapiens interleukin 18 (interferon-gamma-inducing factor) (IL18), transcript variant 1, mRNA."	RefSeq	5.32237	5.84617	-3.14171	-1.43774	0.010162	0.007304	down
TC14001122.hg.1	SAV1	NM_021818	"Homo sapiens salvador homolog 1 (Drosophila) (SAV1), mRNA."	RefSeq	4.79471	5.31823	-6.72676	-1.43745	0.001073	0	down
TC03001455.hg.1	TNNC1	NM_003280	"Homo sapiens troponin C type 1 (slow) (TNNC1), mRNA."	RefSeq	6.84276	7.36614	-4.20273	-1.43731	0.004605	0.001624	down
TC07001039.hg.1	INSIG1	NM_005542	"Homo sapiens insulin induced gene 1 (INSIG1), transcript variant 1, mRNA."	RefSeq	3.44972	3.97212	-9.26515	-1.43634	0.000347	0	down
TC18000440.hg.1	B4GALT6	NM_004775	"Homo sapiens UDP-Gal:betaGlcNAc beta 1,4- galactosyltransferase, polypeptide 6 (B4GALT6), mRNA."	RefSeq	2.18918	2.71089	-4.08747	-1.43565	0.004949	0.001624	down
TC19000097.hg.1	UHRF1	NM_001048201	"Homo sapiens ubiquitin-like with PHD and ring finger domains 1 (UHRF1), transcript variant 1, mRNA."	RefSeq	4.20604	4.72719	-7.12597	-1.4351	0.000869	0	down
TC07001654.hg.1	MCM7	NM_182776	"Homo sapiens minichromosome maintenance complex component 7 (MCM7), transcript variant 2, mRNA."	RefSeq	4.75585	5.27654	-6.46619	-1.43464	0.001194	0	down
TC12001377.hg.1	PKP2	NM_001005242	"Homo sapiens plakophilin 2 (PKP2), transcript variant 2a, mRNA."	RefSeq	6.95443	7.47491	-10.8563	-1.43444	0.000251	0	down
TC14000388.hg.1	MTHFD1	NM_005956	"Homo sapiens methylenetetrahydrofolate dehydrogenase (NADP+ dependent) 1, methenyltetrahydrofolate cyclohydrolase, formyltetrahydrofolate synthetase (MTHFD1), mRNA."	RefSeq	6.25699	6.77704	-7.26952	-1.434	0.000812	0	down
TC04001212.hg.1	CLOCK	NM_004898	"Homo sapiens clock circadian regulator (CLOCK), transcript variant 2, mRNA."	RefSeq	4.64198	5.16167	-3.89756	-1.43365	0.005586	0.001624	down
TC20000928.hg.1	B4GALT5	NM_004776	"Homo sapiens UDP-Gal:betaGlcNAc beta 1,4- galactosyltransferase, polypeptide 5 (B4GALT5), mRNA."	RefSeq	5.76312	6.28217	-4.5885	-1.43301	0.003568	0.001369	down
TC01000309.hg.1	GRHL3	NM_001195010	"Homo sapiens grainyhead-like 3 (Drosophila) (GRHL3), transcript variant 4, mRNA."	RefSeq	4.58248	5.10112	-5.40031	-1.43261	0.00218	0	down
TC09001276.hg.1	RASEF	NM_152573	"Homo sapiens RAS and EF-hand domain containing (RASEF), mRNA."	RefSeq	4.04738	4.56584	-4.33036	-1.43243	0.004223	0.001369	down
TC0X001064.hg.1	SMC1A	NM_006306	"Homo sapiens structural maintenance of chromosomes 1A (SMC1A), mRNA."	RefSeq	5.38834	5.90674	-5.41133	-1.43237	0.002155	0	down
TC01000727.hg.1	RAVER2	NM_018211	"Homo sapiens ribonucleoprotein, PTB-binding 2 (RAVER2), mRNA."	RefSeq	4.01313	4.53123	-4.76555	-1.43207	0.003122	0.001369	down
TC17000309.hg.1	WSB1	NM_015626	"Homo sapiens WD repeat and SOCS box containing 1 (WSB1), transcript variant 1, mRNA."	RefSeq	5.23208	5.74971	-4.66541	-1.43161	0.003383	0.001369	down
TC01002003.hg.1	SCCPDH	NM_016002	"Homo sapiens saccharopine dehydrogenase (putative) (SCCPDH), mRNA."	RefSeq	4.04584	4.56328	-4.09267	-1.43141	0.004924	0.001624	down
TC13000295.hg.1	SCEL	NM_001160706	"Homo sapiens sciellin (SCEL), transcript variant 3, mRNA."	RefSeq	1.90011	2.41633	-5.66694	-1.4302	0.001875	0	down
TC13000744.hg.1	MYCBP2	NM_015057	"Homo sapiens MYC binding protein 2, E3 ubiquitin protein ligase (MYCBP2), mRNA."	RefSeq	2.38265	2.8986	-3.92786	-1.42994	0.005503	0.001624	down
TC17001761.hg.1	USP32	NM_032582	"Homo sapiens ubiquitin specific peptidase 32 (USP32), mRNA."	RefSeq	3.99652	4.51145	-4.55364	-1.42893	0.003663	0.001369	down
TC06000747.hg.1	MYO6	NM_004999	"Homo sapiens myosin VI (MYO6), mRNA."	RefSeq	5.27739	5.79214	-4.55836	-1.42875	0.003651	0.001369	down
TC09001331.hg.1	IARS	NM_002161	"Homo sapiens isoleucyl-tRNA synthetase (IARS), transcript variant 1, mRNA."	RefSeq	6.55263	7.06728	-4.34619	-1.42865	0.004173	0.001369	down
TC12001303.hg.1	C2CD5	NM_014802	"Homo sapiens C2 calcium-dependent domain containing 5 (C2CD5), mRNA."	RefSeq	3.97039	4.48443	-6.25462	-1.42804	0.001378	0	down
TC18000226.hg.1	SERPINB5	NM_002639	"Homo sapiens serpin peptidase inhibitor, clade B (ovalbumin), member 5 (SERPINB5), mRNA."	RefSeq	1.70546	2.21699	-3.60514	-1.42557	0.007062	0.002462	down
TC10000644.hg.1	KIF20B	NM_016195	"Homo sapiens kinesin family member 20B (KIF20B), mRNA."	RefSeq	3.1059	3.61723	-3.43273	-1.42536	0.008068	0.00432	down
TC08001431.hg.1	CDH17	NM_001144663	"Homo sapiens cadherin 17, LI cadherin (liver-intestine) (CDH17), transcript variant 2, mRNA."	RefSeq	5.99905	6.50817	-3.86	-1.42319	0.005757	0.002462	down
TC06004137.hg.1	ARHGAP18	NM_033515	"Homo sapiens Rho GTPase activating protein 18 (ARHGAP18), mRNA."	RefSeq	6.00788	6.51689	-4.59966	-1.42307	0.00353	0.001369	down
TC01000302.hg.1	LYPLA2	NM_007260	"Homo sapiens lysophospholipase II (LYPLA2), mRNA."	RefSeq	4.79092	5.29799	-4.39907	-1.42116	0.004045	0.001369	down
TC09000045.hg.1	IL33	NM_001199640	"Homo sapiens interleukin 33 (IL33), transcript variant 2, mRNA."	RefSeq	1.91467	2.42043	-3.58723	-1.41987	0.007177	0.002462	down
TC11000208.hg.1	FAR1	NM_032228	"Homo sapiens fatty acyl CoA reductase 1 (FAR1), mRNA."	RefSeq	5.32272	5.82774	-3.70594	-1.41914	0.00654	0.002462	down
TC20000878.hg.1	SDC4	NM_002999	"Homo sapiens syndecan 4 (SDC4), mRNA."	RefSeq	6.83602	7.33909	-6.40367	-1.41723	0.001257	0	down
TC12000694.hg.1	TMTC3	NM_181783	"Homo sapiens transmembrane and tetratricopeptide repeat containing 3 (TMTC3), mRNA."	RefSeq	5.46812	5.97105	-3.4953	-1.41708	0.007673	0.00432	down
TC0X000050.hg.1	PRPS2	NM_001039091	"Homo sapiens phosphoribosyl pyrophosphate synthetase 2 (PRPS2), transcript variant 1, mRNA."	RefSeq	6.20832	6.70998	-3.4481	-1.41584	0.007947	0.00432	down
TC11000790.hg.1	POLD3	NM_006591	"Homo sapiens polymerase (DNA-directed), delta 3, accessory subunit (POLD3), transcript variant 1, mRNA."	RefSeq	4.43533	4.93663	-6.5915	-1.41548	0.001111	0	down
TC04001530.hg.1	ANKRD50	NM_001167882	"Homo sapiens ankyrin repeat domain 50 (ANKRD50), transcript variant 2, mRNA."	RefSeq	2.12702	2.62747	-6.41774	-1.41466	0.001251	0	down
TC16002065.hg.1	NPIPB11	ENST00000524087	cdna:putative chromosome:GRCh37:16:29392675:29415350:-1 gene:ENSG00000254206 gene_biotype:protein_coding transcript_biotype:protein_coding	ENSEMBL	6.44197	6.94138	-2.94606	-1.41364	0.012097	0.007304	down
TC05001316.hg.1	HMGCS1	NM_001098272	"Homo sapiens 3-hydroxy-3-methylglutaryl-CoA synthase 1 (soluble) (HMGCS1), transcript variant 1, mRNA."	RefSeq	3.09934	3.59817	-4.59132	-1.41307	0.003561	0.001369	down
TC22000647.hg.1	LIF	NM_002309	"Homo sapiens leukemia inhibitory factor (LIF), transcript variant 1, mRNA."	RefSeq	2.98429	3.48258	-6.11798	-1.41253	0.001493	0	down
TC20000822.hg.1	RBL1	NM_002895	"Homo sapiens retinoblastoma-like 1 (p107) (RBL1), transcript variant 1, mRNA."	RefSeq	3.79615	4.29439	-4.76415	-1.41249	0.003129	0.001369	down
TC22000260.hg.1	MCM5	NM_006739	"Homo sapiens minichromosome maintenance complex component 5 (MCM5), mRNA."	RefSeq	5.36524	5.86262	-5.49083	-1.41165	0.002046	0	down
TC05000471.hg.1	ERAP2	NM_001130140	"Homo sapiens endoplasmic reticulum aminopeptidase 2 (ERAP2), transcript variant 2, mRNA."	RefSeq	3.88265	4.37979	-5.56087	-1.41141	0.002002	0	down
TC03001851.hg.1	XRN1	NM_001042604	"Homo sapiens 5'-3' exoribonuclease 1 (XRN1), transcript variant 2, mRNA."	RefSeq	3.54187	4.03635	-3.53281	-1.40881	0.007419	0.002462	down
TC06002181.hg.1	HIVEP2	NM_006734	"Homo sapiens human immunodeficiency virus type I enhancer binding protein 2 (HIVEP2), mRNA."	RefSeq	4.61309	5.10726	-3.62538	-1.40851	0.006948	0.002462	down
TC11000483.hg.1	FAM111A	NM_001142519	"Homo sapiens family with sequence similarity 111, member A (FAM111A), transcript variant 4, mRNA."	RefSeq	4.27172	4.76553	-5.28828	-1.40816	0.002358	0	down
TC02002187.hg.1	2017-09-10	NM_144710	"Homo sapiens septin 10 (SEPT10), transcript variant 1, mRNA."	RefSeq	5.19944	5.69261	-5.14731	-1.40753	0.002549	0	down
TC02000219.hg.1	LTBP1	NM_000627	"Homo sapiens latent transforming growth factor beta binding protein 1 (LTBP1), transcript variant 2, mRNA."	RefSeq	2.51172	3.00445	-4.29203	-1.4071	0.004376	0.001369	down
TC03000113.hg.1	KAT2B	NM_003884	"Homo sapiens K(lysine) acetyltransferase 2B (KAT2B), mRNA."	RefSeq	3.68719	4.17954	-5.31131	-1.40674	0.002295	0	down
TC14001348.hg.1	SPTLC2	NM_004863	"Homo sapiens serine palmitoyltransferase, long chain base subunit 2 (SPTLC2), mRNA."	RefSeq	6.38412	6.87644	-4.63384	-1.4067	0.003453	0.001369	down
TC11001372.hg.1	CYB5R2	NM_016229	"Homo sapiens cytochrome b5 reductase 2 (CYB5R2), mRNA."	RefSeq	2.94913	3.43919	-6.169	-1.4045	0.001448	0	down
TC02000511.hg.1	MAT2A	NM_005911	"Homo sapiens methionine adenosyltransferase II, alpha (MAT2A), mRNA."	RefSeq	5.55765	6.04568	-4.18738	-1.40253	0.004688	0.001624	down
TC04001682.hg.1	FAM198B	NM_001031700	"Homo sapiens family with sequence similarity 198, member B (FAM198B), transcript variant 1, mRNA."	RefSeq	2.71355	3.20066	-5.61198	-1.40163	0.001938	0	down
TC01000932.hg.1	PRPF38B	NM_018061	"Homo sapiens PRP38 pre-mRNA processing factor 38 (yeast) domain containing B (PRPF38B), transcript variant 1, mRNA."	RefSeq	3.54064	4.02732	-2.95474	-1.40122	0.011976	0.007304	down
TC12000496.hg.1	CDK2	NM_001798	"Homo sapiens cyclin-dependent kinase 2 (CDK2), transcript variant 1, mRNA."	RefSeq	4.27219	4.75853	-3.98676	-1.40089	0.005242	0.001624	down
TC09000687.hg.1	TMSB4XP4	ENST00000323496	cdna:known chromosome:GRCh37:9:131104432:131105049:1 gene:ENSG00000223551 gene_biotype:protein_coding transcript_biotype:protein_coding	ENSEMBL	5.05827	5.54423	-0.983031	-1.40052	0.212753	0.270995	down
TC11000174.hg.1	WEE1	NM_001143976	"Homo sapiens WEE1 homolog (S. pombe) (WEE1), transcript variant 2, mRNA."	RefSeq	5.15054	5.63387	-4.43663	-1.39797	0.003969	0.001369	down
TC07001214.hg.1	HNRNPA2B1	NM_002137	"Homo sapiens heterogeneous nuclear ribonucleoprotein A2/B1 (HNRNPA2B1), transcript variant A2, mRNA."	RefSeq	6.59086	7.07366	-3.65332	-1.39745	0.006789	0.002462	down
TC14001253.hg.1	ZFP36L1	NM_001244698	"Homo sapiens ZFP36 ring finger protein-like 1 (ZFP36L1), transcript variant 2, mRNA."	RefSeq	5.97713	6.45957	-3.51716	-1.39711	0.007514	0.002462	down
TC17001800.hg.1	DDX5	NM_004396	"Homo sapiens DEAD (Asp-Glu-Ala-Asp) box helicase 5 (DDX5), mRNA."	RefSeq	7.46135	7.94301	-4.71702	-1.39636	0.003243	0.001369	down
TC06000060.hg.1	DSP	NM_001008844	"Homo sapiens desmoplakin (DSP), transcript variant 2, mRNA."	RefSeq	5.97855	6.45986	-4.18557	-1.39602	0.004701	0.001624	down
TC12000781.hg.1	UTP20	NM_014503	"Homo sapiens UTP20, small subunit (SSU) processome component, homolog (yeast) (UTP20), mRNA."	RefSeq	2.02711	2.50784	-3.67738	-1.39545	0.006649	0.002462	down
TC09000182.hg.1	UNC13B	NM_006377	"Homo sapiens unc-13 homolog B (C. elegans) (UNC13B), mRNA."	RefSeq	3.1106	3.59058	-6.35651	-1.39472	0.001289	0	down
TC03001978.hg.1	GOLIM4	NM_014498	"Homo sapiens golgi integral membrane protein 4 (GOLIM4), mRNA."	RefSeq	2.96712	3.44676	-6.85065	-1.3944	0.000996	0	down
TC12001051.hg.1	EP400	NM_015409	"Homo sapiens E1A binding protein p400 (EP400), mRNA."	RefSeq	4.016	4.49562	-5.83283	-1.39438	0.001703	0	down
TC09000544.hg.1	ZNF462	NM_021224	"Homo sapiens zinc finger protein 462 (ZNF462), mRNA."	RefSeq	1.90544	2.38431	-7.41624	-1.39365	0.000754	0	down
TC14000297.hg.1	FRMD6	NM_001042481	"Homo sapiens FERM domain containing 6 (FRMD6), transcript variant 1, mRNA."	RefSeq	2.27567	2.7537	-6.49772	-1.39284	0.001168	0	down
TC03000365.hg.1	APPL1	NM_012096	"Homo sapiens adaptor protein, phosphotyrosine interaction, PH domain and leucine zipper containing 1 (APPL1), mRNA."	RefSeq	3.25214	3.72993	-5.4579	-1.39261	0.00211	0	down
TC17_ctg5_hap1000002.hg.1	ARL17A	NM_001113738	"Homo sapiens ADP-ribosylation factor-like 17A (ARL17A), transcript variant 1, mRNA."	RefSeq	5.68323	6.16087	-6.12961	-1.39247	0.001486	0	down
TC02000663.hg.1	SULT1C2	NM_001056	"Homo sapiens sulfotransferase family, cytosolic, 1C, member 2 (SULT1C2), transcript variant 1, mRNA."	RefSeq	3.07905	3.55653	-4.67872	-1.39231	0.00332	0.001369	down
TC08001191.hg.1	PRKDC	NM_006904	"Homo sapiens protein kinase, DNA-activated, catalytic polypeptide (PRKDC), transcript variant 1, mRNA."	RefSeq	6.72419	7.2011	-3.82044	-1.39175	0.005898	0.002462	down
TC06001895.hg.1	PHIP	NM_017934	"Homo sapiens pleckstrin homology domain interacting protein (PHIP), mRNA."	RefSeq	3.88532	4.36217	-2.61983	-1.3917	0.016636	0.011282	down
TC11001499.hg.1	SVIP	NM_148893	"Homo sapiens small VCP/p97-interacting protein (SVIP), mRNA."	RefSeq	4.3389	4.81506	-6.30131	-1.39104	0.001353	0	down
TC09001405.hg.1	TBC1D2	NM_018421	"Homo sapiens TBC1 domain family, member 2 (TBC1D2), transcript variant 2, mRNA."	RefSeq	4.75259	5.22855	-4.04882	-1.39084	0.005083	0.001624	down
TC15002759.hg.1	CKMT1A	NM_001015001	"Homo sapiens creatine kinase, mitochondrial 1A (CKMT1A), nuclear gene encoding mitochondrial protein, mRNA."	RefSeq	1.72749	2.2034	-10.8088	-1.3908	0.000258	0	down
TC06002265.hg.1	EZR	NM_001111077	"Homo sapiens ezrin (EZR), transcript variant 2, mRNA."	RefSeq	7.97926	8.45508	-3.96479	-1.3907	0.00535	0.001624	down
TC15000364.hg.1	SQRDL	NM_021199	"Homo sapiens sulfide quinone reductase-like (yeast) (SQRDL), nuclear gene encoding mitochondrial protein, transcript variant 1, mRNA."	RefSeq	4.2342	4.70993	-5.59569	-1.39062	0.001957	0	down
TC04001047.hg.1	BOD1L1	NM_148894	"Homo sapiens biorientation of chromosomes in cell division 1-like 1 (BOD1L1), mRNA."	RefSeq	1.93959	2.41248	-5.96635	-1.38789	0.001588	0	down
TC15000614.hg.1	ZWILCH	NM_017975	"Homo sapiens zwilch kinetochore protein (ZWILCH), transcript variant 1, mRNA."	RefSeq	4.35669	4.82924	-4.64349	-1.38756	0.003421	0.001369	down
TC20001756.hg.1	ANKEF1	NM_022096	"Homo sapiens ankyrin repeat and EF-hand domain containing 1 (ANKEF1), transcript variant 1, mRNA."	RefSeq	2.91626	3.38862	-6.40348	-1.38738	0.001264	0	down
TC12000062.hg.1	RAD51AP1	NM_001130862	"Homo sapiens RAD51 associated protein 1 (RAD51AP1), transcript variant 1, mRNA."	RefSeq	2.82758	3.29981	-3.2937	-1.38725	0.008953	0.00432	down
TC15001337.hg.1	CEP152	NM_001194998	"Homo sapiens centrosomal protein 152kDa (CEP152), transcript variant 1, mRNA."	RefSeq	1.90532	2.37749	-3.29671	-1.38719	0.008934	0.00432	down
TC0X000433.hg.1	SH3BGRL	NM_003022	"Homo sapiens SH3 domain binding glutamic acid-rich protein like (SH3BGRL), mRNA."	RefSeq	1.58496	2.05592	-4.99613	-1.38603	0.00274	0.001369	down
TC17001724.hg.1	SRSF1	NM_001078166	"Homo sapiens serine/arginine-rich splicing factor 1 (SRSF1), transcript variant 2, mRNA."	RefSeq	6.78561	7.25542	-7.49503	-1.38493	0.000722	0	down
TC19000665.hg.1	CALM3	NM_005184	"Homo sapiens calmodulin 3 (phosphorylase kinase, delta) (CALM3), mRNA."	RefSeq	6.97868	7.44766	-4.6658	-1.38413	0.003377	0.001369	down
TC14001120.hg.1	MAP4K5	NM_006575	"Homo sapiens mitogen-activated protein kinase kinase kinase kinase 5 (MAP4K5), transcript variant 1, mRNA."	RefSeq	4.72389	5.1913	-3.74051	-1.38263	0.006286	0.002462	down
TC0X001173.hg.1	ATRX	NM_000489	"Homo sapiens alpha thalassemia/mental retardation syndrome X-linked (ATRX), transcript variant 1, mRNA."	RefSeq	2.14196	2.60919	-3.38014	-1.38245	0.008386	0.00432	down
TC09000134.hg.1	DNAJA1	NM_001539	"Homo sapiens DnaJ (Hsp40) homolog, subfamily A, member 1 (DNAJA1), mRNA."	RefSeq	5.03731	5.50446	-3.25538	-1.38237	0.009246	0.00432	down
TC07001559.hg.1	SEMA3C	NM_006379	"Homo sapiens sema domain, immunoglobulin domain (Ig), short basic domain, secreted, (semaphorin) 3C (SEMA3C), mRNA."	RefSeq	1.75479	2.22129	-6.1341	-1.38176	0.001474	0	down
TC6_cox_hap2000123.hg.1	ZFP57	BC157878	"Homo sapiens zinc finger protein 57 homolog (mouse), mRNA (cDNA clone MGC:189704 IMAGE:8862701), complete cds."	GenBank	3.66785	4.13427	-2.97535	-1.38168	0.011754	0.007304	down
TC03001714.hg.1	CCDC14	NM_022757	"Homo sapiens coiled-coil domain containing 14 (CCDC14), mRNA."	RefSeq	2.89573	3.36069	-4.69779	-1.38028	0.003281	0.001369	down
TC07002047.hg.1	XRCC2	NM_005431	"Homo sapiens X-ray repair complementing defective repair in Chinese hamster cells 2 (XRCC2), mRNA."	RefSeq	3.25686	3.72103	-3.21433	-1.37952	0.009564	0.00432	down
TC07001580.hg.1	SLC25A40	NM_018843	"Homo sapiens solute carrier family 25, member 40 (SLC25A40), nuclear gene encoding mitochondrial protein, mRNA."	RefSeq	2.90806	3.37139	-4.7108	-1.37872	0.003262	0.001369	down
TC06000846.hg.1	AIM1	NM_001624	"Homo sapiens absent in melanoma 1 (AIM1), mRNA."	RefSeq	4.55096	5.01307	-3.26322	-1.37756	0.00915	0.00432	down
TC11002264.hg.1	NPAT	NM_002519	"Homo sapiens nuclear protein, ataxia-telangiectasia locus (NPAT), mRNA."	RefSeq	2.57182	3.03366	-3.45862	-1.37729	0.007839	0.00432	down
TC06001486.hg.1	ZFP57	ENST00000376881	cdna:known chromosome:GRCh37:6:29640169:29644780:-1 gene:ENSG00000204644 gene_biotype:protein_coding transcript_biotype:protein_coding	ENSEMBL	3.6361	4.09552	-3.41831	-1.37499	0.00818	0.00432	down
TC6_dbb_hap3000112.hg.1	ZFP57	BC157878	"Homo sapiens zinc finger protein 57 homolog (mouse), mRNA (cDNA clone MGC:189704 IMAGE:8862701), complete cds."	GenBank	3.6361	4.09552	-3.41831	-1.37499	0.00818	0.00432	down
TC6_mann_hap4000101.hg.1	ZFP57	BC157878	"Homo sapiens zinc finger protein 57 homolog (mouse), mRNA (cDNA clone MGC:189704 IMAGE:8862701), complete cds."	GenBank	3.6361	4.09552	-3.41831	-1.37499	0.00818	0.00432	down
TC6_mcf_hap5000105.hg.1	ZFP57	BC157878	"Homo sapiens zinc finger protein 57 homolog (mouse), mRNA (cDNA clone MGC:189704 IMAGE:8862701), complete cds."	GenBank	3.6361	4.09552	-3.41831	-1.37499	0.00818	0.00432	down
TC6_qbl_hap6000113.hg.1	ZFP57	BC157878	"Homo sapiens zinc finger protein 57 homolog (mouse), mRNA (cDNA clone MGC:189704 IMAGE:8862701), complete cds."	GenBank	3.6361	4.09552	-3.41831	-1.37499	0.00818	0.00432	down
TC6_ssto_hap7000104.hg.1	ZFP57	BC157878	"Homo sapiens zinc finger protein 57 homolog (mouse), mRNA (cDNA clone MGC:189704 IMAGE:8862701), complete cds."	GenBank	3.6361	4.09552	-3.41831	-1.37499	0.00818	0.00432	down
TC15001576.hg.1	TIPIN	NM_017858	"Homo sapiens TIMELESS interacting protein (TIPIN), mRNA."	RefSeq	2.71743	3.17607	-4.48429	-1.37425	0.003816	0.001369	down
TC18000109.hg.1	IMPACT	NM_018439	"Homo sapiens impact RWD domain protein (IMPACT), mRNA."	RefSeq	3.95606	4.41459	-3.28941	-1.37414	0.008997	0.00432	down
TC21000180.hg.1	PCP4	NM_006198	"Homo sapiens Purkinje cell protein 4 (PCP4), mRNA."	RefSeq	2.60361	3.0611	-3.48707	-1.37315	0.007737	0.00432	down
TC14000936.hg.1	SLC7A7	NM_001126105	"Homo sapiens solute carrier family 7 (amino acid transporter light chain, y+L system), member 7 (SLC7A7), transcript variant 2, mRNA."	RefSeq	1.91015	2.36746	-3.71195	-1.37298	0.006483	0.002462	down
TC09000916.hg.1	NFIB	NM_001190738	"Homo sapiens nuclear factor I/B (NFIB), transcript variant 2, mRNA."	RefSeq	4.46915	4.92572	-4.2382	-1.37227	0.004516	0.001624	down
TC02002194.hg.1	MALL	NM_005434	"Homo sapiens mal, T-cell differentiation protein-like (MALL), mRNA."	RefSeq	5.81886	6.27498	-2.95044	-1.37185	0.012027	0.007304	down
TC01003771.hg.1	C1orf116	NM_001083924	"Homo sapiens chromosome 1 open reading frame 116 (C1orf116), transcript variant 2, mRNA."	RefSeq	5.18602	5.64201	-8.5172	-1.37172	0.000436	0	down
TC08000213.hg.1	ESCO2	NM_001017420	"Homo sapiens establishment of cohesion 1 homolog 2 (S. cerevisiae) (ESCO2), mRNA."	RefSeq	4.17667	4.63243	-4.37368	-1.3715	0.004128	0.001369	down
TC12001643.hg.1	LRIG3	NM_001136051	"Homo sapiens leucine-rich repeats and immunoglobulin-like domains 3 (LRIG3), transcript variant 1, mRNA."	RefSeq	1.83867	2.29438	-4.81798	-1.37146	0.003039	0.001369	down
TC08000729.hg.1	SQLE	NM_003129	"Homo sapiens squalene epoxidase (SQLE), mRNA."	RefSeq	3.92357	4.37891	-5.40254	-1.3711	0.002167	0	down
TC21000288.hg.1	NRIP1	NM_003489	"Homo sapiens nuclear receptor interacting protein 1 (NRIP1), mRNA."	RefSeq	1.73422	2.1894	-5.03244	-1.37096	0.002702	0.001369	down
TC07001603.hg.1	CDK6	NM_001259	"Homo sapiens cyclin-dependent kinase 6 (CDK6), transcript variant 1, mRNA."	RefSeq	2.53372	2.98883	-4.67764	-1.37089	0.003332	0.001369	down
TC19001159.hg.1	DNMT1	NM_001130823	"Homo sapiens DNA (cytosine-5-)-methyltransferase 1 (DNMT1), transcript variant 1, mRNA."	RefSeq	5.96174	6.41668	-8.20001	-1.37072	0.000519	0	down
TC12001796.hg.1	DUSP6	NM_001946	"Homo sapiens dual specificity phosphatase 6 (DUSP6), transcript variant 1, mRNA."	RefSeq	6.6921	7.14683	-2.2388	-1.37053	0.025611	0.017021	down
TC06002092.hg.1	PTPRK	NM_002844	"Homo sapiens protein tyrosine phosphatase, receptor type, K (PTPRK), transcript variant 2, mRNA."	RefSeq	4.92185	5.37552	-4.39437	-1.36951	0.004058	0.001369	down
TC17002855.hg.1	AXIN2	NM_004655	"Homo sapiens axin 2 (AXIN2), mRNA."	RefSeq	6.29229	6.74556	-7.85482	-1.36914	0.000614	0	down
TC18000097.hg.1	RBBP8	NM_002894	"Homo sapiens retinoblastoma binding protein 8 (RBBP8), transcript variant 1, mRNA."	RefSeq	3.58996	4.04302	-3.72233	-1.36894	0.006439	0.002462	down
TC09001484.hg.1	PTGR1	NM_001146108	"Homo sapiens prostaglandin reductase 1 (PTGR1), transcript variant 1, mRNA."	RefSeq	2.72916	3.1822	-4.70624	-1.36892	0.003269	0.001369	down
TC12001002.hg.1	BRI3BP	NM_080626	"Homo sapiens BRI3 binding protein (BRI3BP), mRNA."	RefSeq	4.98967	5.44223	-3.02825	-1.36847	0.011168	0.007304	down
TC10000655.hg.1	BTAF1	NM_003972	"Homo sapiens BTAF1 RNA polymerase II, B-TFIID transcription factor-associated, 170kDa (Mot1 homolog, S. cerevisiae) (BTAF1), mRNA."	RefSeq	3.86544	4.31781	-3.16989	-1.36828	0.009959	0.00432	down
TC16000920.hg.1	KNOP1	NM_001012991	"Homo sapiens lysine-rich nucleolar protein 1 (KNOP1), mRNA."	RefSeq	4.74979	5.20133	-1.59235	-1.3675	0.067833	0.064129	down
TC12000487.hg.1	METTL7B	NM_152637	"Homo sapiens methyltransferase like 7B (METTL7B), mRNA."	RefSeq	4.5037	4.95479	-2.93943	-1.36707	0.012148	0.007304	down
TC09000324.hg.1	SMC5	NM_015110	"Homo sapiens structural maintenance of chromosomes 5 (SMC5), mRNA."	RefSeq	4.13999	4.58963	-3.09721	-1.3657	0.010544	0.007304	down
TC07000235.hg.1	ANLN	NM_018685	"Homo sapiens anillin, actin binding protein (ANLN), mRNA."	RefSeq	5.84522	6.29459	-5.29469	-1.36545	0.00232	0	down
TC19000228.hg.1	JUNB	BC009465	"Homo sapiens jun B proto-oncogene, mRNA (cDNA clone MGC:16048 IMAGE:3611163), complete cds."	GenBank	4.85235	5.30164	-2.28458	-1.36536	0.024109	0.017021	down
TC09000015.hg.1	VLDLR	NM_001018056	"Homo sapiens very low density lipoprotein receptor (VLDLR), transcript variant 2, mRNA."	RefSeq	2.6375	3.08589	-6.93443	-1.36451	0.000945	0	down
TC02002279.hg.1	MAP3K2	NM_006609	"Homo sapiens mitogen-activated protein kinase kinase kinase 2 (MAP3K2), mRNA."	RefSeq	4.26449	4.71182	-4.18504	-1.36351	0.004707	0.001624	down
TC11001795.hg.1	UBE2L6	NM_004223	"Homo sapiens ubiquitin-conjugating enzyme E2L 6 (UBE2L6), transcript variant 1, mRNA."	RefSeq	4.53235	4.97919	-3.72799	-1.36305	0.0064	0.002462	down
TC17000016.hg.1	RPA1	NM_002945	"Homo sapiens replication protein A1, 70kDa (RPA1), mRNA."	RefSeq	5.72166	6.16753	-4.0105	-1.36213	0.005178	0.001624	down
TC01001473.hg.1	ATP1B1	NM_001677	"Homo sapiens ATPase, Na+/K+ transporting, beta 1 polypeptide (ATP1B1), mRNA."	RefSeq	5.90028	6.34525	-3.86974	-1.36128	0.005713	0.002462	down
TC14000418.hg.1	SRSF5	NM_001039465	"Homo sapiens serine/arginine-rich splicing factor 5 (SRSF5), transcript variant 1, mRNA."	RefSeq	5.47469	5.91843	-6.13203	-1.36013	0.00148	0	down
TC18000418.hg.1	OSBPL1A	NM_001242508	"Homo sapiens oxysterol binding protein-like 1A (OSBPL1A), transcript variant 3, mRNA."	RefSeq	4.0912	4.53463	-4.45824	-1.35984	0.003943	0.001369	down
TC21000401.hg.1	PAXBP1	NM_016631	"Homo sapiens PAX3 and PAX7 binding protein 1 (PAXBP1), transcript variant 1, mRNA."	RefSeq	2.56626	3.00831	-3.14048	-1.35853	0.010175	0.007304	down
TC03000986.hg.1	YEATS2	NM_018023	"Homo sapiens YEATS domain containing 2 (YEATS2), mRNA."	RefSeq	3.16986	3.61147	-4.07724	-1.35812	0.004994	0.001624	down
TC01002676.hg.1	NDC1	NM_001168551	"Homo sapiens transmembrane protein 48 (TMEM48), transcript variant 2, mRNA."	RefSeq	5.26797	5.70935	-4.98864	-1.35791	0.002759	0.001369	down
TC02001742.hg.1	PRKD3	NM_005813	"Homo sapiens protein kinase D3 (PRKD3), mRNA."	RefSeq	4.13955	4.58014	-5.15578	-1.35716	0.00253	0	down
TC03000051.hg.1	FANCD2	NM_001018115	"Homo sapiens Fanconi anemia, complementation group D2 (FANCD2), transcript variant 2, mRNA."	RefSeq	3.98296	4.42318	-5.17322	-1.35681	0.002505	0	down
TC17001812.hg.1	HELZ	NM_014877	"Homo sapiens helicase with zinc finger (HELZ), mRNA."	RefSeq	4.02058	4.46061	-3.32853	-1.35663	0.008647	0.00432	down
TC0X000636.hg.1	HPRT1	NM_000194	"Homo sapiens hypoxanthine phosphoribosyltransferase 1 (HPRT1), mRNA."	RefSeq	3.81458	4.25456	-4.1187	-1.35658	0.004835	0.001624	down
TC15001048.hg.1	NIPA2	NM_001008860	"Homo sapiens non imprinted in Prader-Willi/Angelman syndrome 2 (NIPA2), transcript variant 2, mRNA."	RefSeq	4.26917	4.709	-4.6371	-1.35644	0.003434	0.001369	down
TC05000232.hg.1	GPX8	NM_001008397	"Homo sapiens glutathione peroxidase 8 (putative) (GPX8), mRNA."	RefSeq	3.21703	3.65669	-4.44293	-1.35629	0.003962	0.001369	down
TC13000861.hg.1	ARGLU1	NM_018011	"Homo sapiens arginine and glutamate rich 1 (ARGLU1), mRNA."	RefSeq	5.39783	5.83375	-6.20669	-1.35277	0.001416	0	down
TC01000427.hg.1	HDAC1	NM_004964	"Homo sapiens histone deacetylase 1 (HDAC1), mRNA."	RefSeq	5.0852	5.52069	-5.2781	-1.35237	0.002377	0	down
TC20000046.hg.1		BC008667	"Homo sapiens cDNA clone MGC:17708 IMAGE:3868595, complete cds."	GenBank	1.61368	2.04893	-2.62934	-1.35214	0.016432	0.011282	down
TC19000191.hg.1	LDLR	NM_000527	"Homo sapiens low density lipoprotein receptor (LDLR), transcript variant 1, mRNA."	RefSeq	4.66512	5.10024	-2.99054	-1.35203	0.011601	0.007304	down
TC12001605.hg.1	TIMELESS	NM_003920	"Homo sapiens timeless circadian clock (TIMELESS), mRNA."	RefSeq	4.08608	4.5189	-4.27729	-1.34987	0.004402	0.001369	down
TC0X002299.hg.1	PRRG1	NM_001142395	"Homo sapiens proline rich Gla (G-carboxyglutamic acid) 1 (PRRG1), transcript variant 2, mRNA."	RefSeq	2.7897	3.22231	-2.90425	-1.34967	0.012632	0.007304	down
TC02000064.hg.1	ATP6V1C2	NM_144583	"Homo sapiens ATPase, H+ transporting, lysosomal 42kDa, V1 subunit C2 (ATP6V1C2), transcript variant 2, mRNA."	RefSeq	3.65229	4.08456	-3.59601	-1.34936	0.007107	0.002462	down
TC07001147.hg.1	VWDE	NM_001135924	"Homo sapiens von Willebrand factor D and EGF domains (VWDE), mRNA."	RefSeq	1.99897	2.43079	-4.08344	-1.34894	0.004962	0.001624	down
TC10000908.hg.1	FAM175B	NM_032182	"Homo sapiens family with sequence similarity 175, member B (FAM175B), mRNA."	RefSeq	4.64522	5.07616	-5.52227	-1.34811	0.002034	0	down
TC05001275.hg.1	NUP155	NM_004298	"Homo sapiens nucleoporin 155kDa (NUP155), transcript variant 2, mRNA."	RefSeq	5.68391	6.11292	-4.5946	-1.34631	0.003542	0.001369	down
TC04001450.hg.1	TBCK	NM_001163436	"Homo sapiens TBC1 domain containing kinase (TBCK), transcript variant 2, mRNA."	RefSeq	3.57124	4.00017	-4.4745	-1.34623	0.003867	0.001369	down
TC03001690.hg.1	LRRC58	NM_001099678	"Homo sapiens leucine rich repeat containing 58 (LRRC58), mRNA."	RefSeq	4.48407	4.91216	-2.89728	-1.34545	0.01274	0.007304	down
TC20000169.hg.1	GINS1	NM_021067	"Homo sapiens GINS complex subunit 1 (Psf1 homolog) (GINS1), mRNA."	RefSeq	3.80994	4.23741	-5.81684	-1.34488	0.001715	0	down
TC01003662.hg.1	ASPM	NM_001206846	"Homo sapiens asp (abnormal spindle) homolog, microcephaly associated (Drosophila) (ASPM), transcript variant 2, mRNA."	RefSeq	2.69416	3.12134	-2.92282	-1.34461	0.012327	0.007304	down
TC01003623.hg.1	EDEM3	NM_025191	"Homo sapiens ER degradation enhancer, mannosidase alpha-like 3 (EDEM3), mRNA."	RefSeq	3.34052	3.76748	-2.65325	-1.3444	0.016063	0.011282	down
TC11002446.hg.1	ARHGAP32	NM_001142685	"Homo sapiens Rho GTPase activating protein 32 (ARHGAP32), transcript variant 1, mRNA."	RefSeq	6.369	6.79514	-6.03926	-1.34363	0.001531	0	down
TC06001961.hg.1	FBXL4	NM_012160	"Homo sapiens F-box and leucine-rich repeat protein 4 (FBXL4), mRNA."	RefSeq	1.98299	2.40901	-5.37433	-1.34352	0.002212	0	down
TC10001324.hg.1	RTKN2	NM_145307	"Homo sapiens rhotekin 2 (RTKN2), mRNA."	RefSeq	2.00161	2.42708	-3.80259	-1.34302	0.005936	0.002462	down
TC12000602.hg.1	NUP107	NM_020401	"Homo sapiens nucleoporin 107kDa (NUP107), mRNA."	RefSeq	3.97486	4.40016	-3.71726	-1.34285	0.006451	0.002462	down
TC04000427.hg.1	SHROOM3	NM_020859	"Homo sapiens shroom family member 3 (SHROOM3), mRNA."	RefSeq	3.87207	4.2971	-5.77233	-1.3426	0.001754	0	down
TC07001811.hg.1	AASS	NM_005763	"Homo sapiens aminoadipate-semialdehyde synthase (AASS), nuclear gene encoding mitochondrial protein, mRNA."	RefSeq	1.59526	2.02011	-5.70062	-1.34242	0.001824	0	down
TC22000514.hg.1	GGTLC3	ENST00000404912	cdna:known chromosome:GRCh37:22:20366211:20368028:-1 gene:ENSG00000183038 gene_biotype:protein_coding transcript_biotype:protein_coding	ENSEMBL	3.42615	3.85096	-3.70894	-1.3424	0.006509	0.002462	down
TC01003903.hg.1	CDC42BPA	NM_003607	"Homo sapiens CDC42 binding protein kinase alpha (DMPK-like) (CDC42BPA), transcript variant B, mRNA."	RefSeq	5.44932	5.874	-2.68906	-1.34227	0.015446	0.011282	down
TC11001498.hg.1	FANCF	NM_022725	"Homo sapiens Fanconi anemia, complementation group F (FANCF), mRNA."	RefSeq	3.07592	3.50032	-3.00226	-1.34201	0.011467	0.007304	down
TC17000355.hg.1	ATAD5	NM_024857	"Homo sapiens ATPase family, AAA domain containing 5 (ATAD5), mRNA."	RefSeq	1.66096	2.08536	-3.06334	-1.34201	0.010843	0.007304	down
TC07001274.hg.1	DPY19L1	NM_015283	"Homo sapiens dpy-19-like 1 (C. elegans) (DPY19L1), mRNA."	RefSeq	3.79509	4.21916	-4.42494	-1.34171	0.004001	0.001369	down
TC06000784.hg.1	ZNF292	NM_015021	"Homo sapiens zinc finger protein 292 (ZNF292), mRNA."	RefSeq	3.13166	3.55482	-3.74465	-1.34086	0.006267	0.002462	down
TC11000592.hg.1	PLCB3	NM_000932	"Homo sapiens phospholipase C, beta 3 (phosphatidylinositol-specific) (PLCB3), transcript variant 1, mRNA."	RefSeq	4.388	4.81097	-3.43342	-1.34069	0.008036	0.00432	down
TC05000401.hg.1	RASGRF2	NM_006909	"Homo sapiens Ras protein-specific guanine nucleotide-releasing factor 2 (RASGRF2), mRNA."	RefSeq	2.16541	2.5882	-5.78249	-1.34052	0.001747	0	down
TC03000187.hg.1	MYD88	NM_001172566	"Homo sapiens myeloid differentiation primary response 88 (MYD88), transcript variant 5, mRNA."	RefSeq	4.07956	4.50232	-4.5465	-1.34049	0.003689	0.001369	down
TC15000377.hg.1	DUT	NM_001025248	"Homo sapiens deoxyuridine triphosphatase (DUT), nuclear gene encoding mitochondrial protein, transcript variant 1, mRNA."	RefSeq	3.04551	3.46819	-6.45027	-1.34041	0.001225	0	down
TC19002668.hg.1	ZNF776	NM_173632	"Homo sapiens zinc finger protein 776 (ZNF776), mRNA."	RefSeq	2.99497	3.41763	-5.04709	-1.3404	0.002689	0.001369	down
TC19001767.hg.1	KLK10	NM_001077500	"Homo sapiens kallikrein-related peptidase 10 (KLK10), transcript variant 3, mRNA."	RefSeq	5.07627	5.49836	-3.22685	-1.33986	0.009424	0.00432	down
TC13000799.hg.1	ABCC4	NM_001105515	"Homo sapiens ATP-binding cassette, sub-family C (CFTR/MRP), member 4 (ABCC4), transcript variant 2, mRNA."	RefSeq	4.59635	5.0184	-4.66541	-1.33983	0.00339	0.001369	down
TC06000762.hg.1	BCKDHB	NM_000056	"Homo sapiens branched chain keto acid dehydrogenase E1, beta polypeptide (BCKDHB), nuclear gene encoding mitochondrial protein, transcript variant 2, mRNA."	RefSeq	3.27083	3.69246	-6.52871	-1.33944	0.001143	0	down
TC10001535.hg.1	MYOF	NM_013451	"Homo sapiens myoferlin (MYOF), transcript variant 1, mRNA."	RefSeq	7.33968	7.75997	-5.84842	-1.3382	0.001684	0	down
TC18000128.hg.1	DSG2	NM_001943	"Homo sapiens desmoglein 2 (DSG2), mRNA."	RefSeq	6.89882	7.3188	-4.27394	-1.3379	0.004414	0.001624	down
TC01001976.hg.1	EXO1	NM_003686	"Homo sapiens exonuclease 1 (EXO1), transcript variant 3, mRNA."	RefSeq	4.05697	4.47692	-4.04664	-1.33788	0.005095	0.001624	down
TC17000675.hg.1	LUC7L3	NM_006107	"Homo sapiens LUC7-like 3 (S. cerevisiae) (LUC7L3), transcript variant 2, mRNA."	RefSeq	3.9933	4.41322	-3.98615	-1.33786	0.005248	0.001624	down
TC05000799.hg.1	TCERG1	NM_001040006	"Homo sapiens transcription elongation regulator 1 (TCERG1), transcript variant 2, mRNA."	RefSeq	2.61753	3.0374	-4.3931	-1.33781	0.004071	0.001369	down
TC11000360.hg.1	API5	NM_001142930	"Homo sapiens apoptosis inhibitor 5 (API5), transcript variant 1, mRNA."	RefSeq	5.4663	5.88605	-4.76309	-1.3377	0.003141	0.001369	down
TC07000458.hg.1	GTF2I	NM_001163636	"Homo sapiens general transcription factor IIi (GTF2I), transcript variant 5, mRNA."	RefSeq	5.18979	5.60884	-5.10022	-1.33704	0.002619	0.001369	down
TC12000193.hg.1	ATF7IP	NM_018179	"Homo sapiens activating transcription factor 7 interacting protein (ATF7IP), mRNA."	RefSeq	4.12314	4.54205	-5.00669	-1.33692	0.002734	0.001369	down
TC04001250.hg.1	UBA6	NM_018227	"Homo sapiens ubiquitin-like modifier activating enzyme 6 (UBA6), mRNA."	RefSeq	4.7815	5.20041	-2.83502	-1.33692	0.013555	0.007304	down
TC10000189.hg.1	MASTL	NM_032844	"Homo sapiens microtubule associated serine/threonine kinase-like (MASTL), transcript variant 2, mRNA."	RefSeq	3.76435	4.18282	-4.91655	-1.33651	0.00288	0.001369	down
TC12001811.hg.1	EEA1	NM_003566	"Homo sapiens early endosome antigen 1 (EEA1), mRNA."	RefSeq	3.8024	4.22051	-2.26372	-1.33618	0.024835	0.017021	down
TC05000299.hg.1	CENPH	NM_022909	"Homo sapiens centromere protein H (CENPH), mRNA."	RefSeq	2.26482	2.68285	-3.40293	-1.33611	0.008291	0.00432	down
TC02000053.hg.1	TAF1B	NM_005680	"Homo sapiens TATA box binding protein (TBP)-associated factor, RNA polymerase I, B, 63kDa (TAF1B), mRNA."	RefSeq	1.89337	2.31126	-3.3617	-1.33597	0.008469	0.00432	down
TC11000541.hg.1	FEN1	NM_004111	"Homo sapiens flap structure-specific endonuclease 1 (FEN1), mRNA."	RefSeq	4.46332	4.881	-8.32935	-1.33577	0.000481	0	down
TC03001888.hg.1	TM4SF1	NM_014220	"Homo sapiens transmembrane 4 L six family member 1 (TM4SF1), mRNA."	RefSeq	6.50951	6.9269	-9.08024	-1.33551	0.00036	0	down
TC06002215.hg.1	NUP43	NM_198887	"Homo sapiens nucleoporin 43kDa (NUP43), transcript variant 1, mRNA."	RefSeq	5.76432	6.18146	-3.72421	-1.33528	0.006426	0.002462	down
TC16000899.hg.1	FOPNL	NM_144600	"Homo sapiens FGFR1OP N-terminal like (FOPNL), mRNA."	RefSeq	5.66496	6.08195	-2.90077	-1.33514	0.012708	0.007304	down
TC11000980.hg.1	ATM	NM_000051	"Homo sapiens ataxia telangiectasia mutated (ATM), mRNA."	RefSeq	2.31596	2.73286	-3.15376	-1.33505	0.010092	0.00432	down
TC06002146.hg.1	MAP3K5	NM_005923	"Homo sapiens mitogen-activated protein kinase kinase kinase 5 (MAP3K5), mRNA."	RefSeq	1.95244	2.36856	-3.65311	-1.33433	0.006795	0.002462	down
TC01000905.hg.1	SLC30A7	NM_001144884	"Homo sapiens solute carrier family 30 (zinc transporter), member 7 (SLC30A7), transcript variant 2, mRNA."	RefSeq	4.38575	4.80164	-5.1775	-1.33412	0.002492	0	down
TC05000343.hg.1	FCHO2	NM_138782	"Homo sapiens FCH domain only 2 (FCHO2), transcript variant 1, mRNA."	RefSeq	3.45825	3.87267	-3.32901	-1.33276	0.008641	0.00432	down
TC01002706.hg.1	TACSTD2	NM_002353	"Homo sapiens tumor-associated calcium signal transducer 2 (TACSTD2), mRNA."	RefSeq	2.15102	2.56518	-3.66566	-1.33252	0.0067	0.002462	down
TC04001279.hg.1	ANKRD17	NM_032217	"Homo sapiens ankyrin repeat domain 17 (ANKRD17), transcript variant 1, mRNA."	RefSeq	5.08669	5.50042	-4.29307	-1.33213	0.004363	0.001369	down
TC11000642.hg.1	OVOL1	NM_004561	"Homo sapiens ovo-like 1(Drosophila) (OVOL1), mRNA."	RefSeq	2.47728	2.89093	-2.28576	-1.33205	0.024064	0.017021	down
TC02002120.hg.1	ANKRD36B	NM_025190	"Homo sapiens ankyrin repeat domain 36B (ANKRD36B), mRNA."	RefSeq	2.68379	3.0971	-3.05456	-1.33174	0.010952	0.007304	down
TC0X000199.hg.1	DDX3X	NM_001193416	"Homo sapiens DEAD (Asp-Glu-Ala-Asp) box polypeptide 3, X-linked (DDX3X), transcript variant 2, mRNA."	RefSeq	6.7196	7.13267	-3.7551	-1.33151	0.006209	0.002462	down
TC09000099.hg.1	FOCAD	NM_017794	"Homo sapiens focadhesin (FOCAD), mRNA."	RefSeq	4.69111	5.1035	-3.10331	-1.33089	0.010493	0.007304	down
TC05001307.hg.1	OXCT1	NM_000436	"Homo sapiens 3-oxoacid CoA transferase 1 (OXCT1), nuclear gene encoding mitochondrial protein, mRNA."	RefSeq	3.92272	4.33458	-4.14182	-1.3304	0.004796	0.001624	down
TC01003636.hg.1	TPR	NM_003292	"Homo sapiens translocated promoter region, nuclear basket protein (TPR), mRNA."	RefSeq	2.92824	3.3401	-2.66997	-1.3304	0.015808	0.011282	down
TC13000825.hg.1	DOCK9	NM_001130048	"Homo sapiens dedicator of cytokinesis 9 (DOCK9), transcript variant 2, mRNA."	RefSeq	3.68452	4.09614	-5.28546	-1.33018	0.002365	0	down
TC03001796.hg.1	TOPBP1	NM_007027	"Homo sapiens topoisomerase (DNA) II binding protein 1 (TOPBP1), mRNA."	RefSeq	3.5351	3.94664	-3.51887	-1.33011	0.007489	0.002462	down
TC02000666.hg.1	GCC2	NM_181453	"Homo sapiens GRIP and coiled-coil domain containing 2 (GCC2), transcript variant 1, mRNA."	RefSeq	4.53672	4.94809	-2.77931	-1.32995	0.014383	0.011282	down
TC04001338.hg.1	SCD5	NM_001037582	"Homo sapiens stearoyl-CoA desaturase 5 (SCD5), transcript variant 1, mRNA."	RefSeq	3.04633	3.45736	-3.01566	-1.32963	0.011327	0.007304	down
TC13000152.hg.1	AKAP11	NM_016248	"Homo sapiens A kinase (PRKA) anchor protein 11 (AKAP11), mRNA."	RefSeq	3.30029	3.71102	-2.81574	-1.32936	0.013848	0.007304	down
TC16000468.hg.1	MT1E	NM_175617	"Homo sapiens metallothionein 1E (MT1E), mRNA."	RefSeq	7.40047	7.80931	-3.61889	-1.32762	0.006992	0.002462	down
TC11000329.hg.1	EHF	NM_001206615	"Homo sapiens ets homologous factor (EHF), transcript variant 3, mRNA."	RefSeq	5.89615	6.30478	-4.93543	-1.32742	0.002829	0.001369	down
TC0X000911.hg.1	RPS6KA3	NM_004586	"Homo sapiens ribosomal protein S6 kinase, 90kDa, polypeptide 3 (RPS6KA3), mRNA."	RefSeq	4.30266	4.71103	-4.14804	-1.32719	0.004777	0.001624	down
TC20000818.hg.1	DSN1	NM_024918	"Homo sapiens DSN1, MIND kinetochore complex component, homolog (S. cerevisiae) (DSN1), transcript variant 3, mRNA."	RefSeq	2.93119	3.33957	-3.88735	-1.32719	0.005624	0.001624	down
TC15001289.hg.1	FRMD5	NM_032892	"Homo sapiens FERM domain containing 5 (FRMD5), transcript variant 2, mRNA."	RefSeq	2.88918	3.29734	-4.55924	-1.32699	0.003644	0.001369	down
TC01001651.hg.1	CAMSAP2	NM_203459	"Homo sapiens calmodulin regulated spectrin-associated protein family, member 2 (CAMSAP2), mRNA."	RefSeq	4.35893	4.7667	-3.27675	-1.32664	0.009087	0.00432	down
TC19001149.hg.1	ZNF121	NM_001008727	"Homo sapiens zinc finger protein 121 (ZNF121), mRNA."	RefSeq	4.86609	5.27348	-3.52773	-1.32628	0.007457	0.002462	down
TC11000332.hg.1	CD44	NM_001001391	"Homo sapiens CD44 molecule (Indian blood group) (CD44), transcript variant 4, mRNA."	RefSeq	4.53878	4.94567	-3.91657	-1.32582	0.005535	0.001624	down
TC02001021.hg.1	CYBRD1	NM_001127383	"Homo sapiens cytochrome b reductase 1 (CYBRD1), transcript variant 2, mRNA."	RefSeq	4.23296	4.63958	-4.64395	-1.32558	0.003415	0.001369	down
TC01004027.hg.1	CHML	NM_001821	"Homo sapiens choroideremia-like (Rab escort protein 2) (CHML), mRNA."	RefSeq	4.93818	5.34439	-1.59531	-1.3252	0.067425	0.064129	down
TC01001582.hg.1	DHX9	NM_001357	"Homo sapiens DEAH (Asp-Glu-Ala-His) box polypeptide 9 (DHX9), transcript variant 1, mRNA."	RefSeq	5.35117	5.75662	-3.44119	-1.3245	0.007998	0.00432	down
TC01000700.hg.1	HOOK1	NM_015888	"Homo sapiens hook homolog 1 (Drosophila) (HOOK1), mRNA."	RefSeq	4.24421	4.64904	-3.21761	-1.32393	0.009526	0.00432	down
TC10000802.hg.1	SMC3	NM_005445	"Homo sapiens structural maintenance of chromosomes 3 (SMC3), mRNA."	RefSeq	4.34233	4.74701	-2.49525	-1.32379	0.01908	0.017021	down
TC06000819.hg.1	UFL1	NM_015323	"Homo sapiens UFM1-specific ligase 1 (UFL1), mRNA."	RefSeq	5.26574	5.66898	-3.8306	-1.32248	0.005834	0.002462	down
TC10001497.hg.1	ANKRD22	NM_144590	"Homo sapiens ankyrin repeat domain 22 (ANKRD22), mRNA."	RefSeq	2.65362	3.0566	-3.46419	-1.32224	0.00782	0.00432	down
TC05001491.hg.1	COL4A3BP	NM_001130105	"Homo sapiens collagen, type IV, alpha 3 (Goodpasture antigen) binding protein (COL4A3BP), transcript variant 3, mRNA."	RefSeq	3.00444	3.40735	-4.88886	-1.32217	0.002931	0.001369	down
TC05000363.hg.1	HMGCR	NM_000859	"Homo sapiens 3-hydroxy-3-methylglutaryl-CoA reductase (HMGCR), transcript variant 1, mRNA."	RefSeq	4.70875	5.10942	-6.33468	-1.32011	0.001295	0	down
TC13000518.hg.1	SLC46A3	NM_001135919	"Homo sapiens solute carrier family 46, member 3 (SLC46A3), transcript variant 2, mRNA."	RefSeq	1.86746	2.2673	-3.86533	-1.31936	0.005732	0.002462	down
TC06000165.hg.1	HFE	NM_000410	"Homo sapiens hemochromatosis (HFE), transcript variant 1, mRNA."	RefSeq	2.03696	2.43662	-7.68794	-1.31919	0.000652	0	down
TC12003238.hg.1	DDX47	NM_016355	"Homo sapiens DEAD (Asp-Glu-Ala-Asp) box polypeptide 47 (DDX47), transcript variant 1, mRNA."	RefSeq	5.62189	6.02137	-5.36958	-1.31903	0.002218	0	down
TC03000664.hg.1	MCM2	NM_004526	"Homo sapiens minichromosome maintenance complex component 2 (MCM2), transcript variant 1, mRNA."	RefSeq	4.00352	4.40209	-5.22674	-1.31821	0.002416	0	down
TC17_ctg5_hap1000003.hg.1	ARL17A	NM_016632	"Homo sapiens ADP-ribosylation factor-like 17A (ARL17A), transcript variant 2, mRNA."	RefSeq	1.7943	2.19214	-2.62484	-1.31754	0.016534	0.011282	down
TC14000917.hg.1	CHD8	NM_001170629	"Homo sapiens chromodomain helicase DNA binding protein 8 (CHD8), transcript variant 1, mRNA."	RefSeq	4.39999	4.79755	-4.91763	-1.31727	0.002874	0.001369	down
TC16000640.hg.1	CMIP	NM_198390	"Homo sapiens c-Maf inducing protein (CMIP), transcript variant 1, mRNA."	RefSeq	4.66339	5.06048	-4.77585	-1.31685	0.003109	0.001369	down
TC14001255.hg.1	ACTN1	NM_001102	"Homo sapiens actinin, alpha 1 (ACTN1), transcript variant 2, mRNA."	RefSeq	5.73129	6.12788	-3.00865	-1.31639	0.011384	0.007304	down
TC19001906.hg.1	ZNF417	NM_152475	"Homo sapiens zinc finger protein 417 (ZNF417), mRNA."	RefSeq	2.72077	3.11735	-3.4908	-1.31638	0.007705	0.00432	down
TC02001738.hg.1	HEATR5B	NM_019024	"Homo sapiens HEAT repeat containing 5B (HEATR5B), mRNA."	RefSeq	2.57417	2.96605	-2.72815	-1.31211	0.014968	0.011282	down
TC07001979.hg.1	OR2A7	BC136704	"Homo sapiens olfactory receptor, family 2, subfamily A, member 7, mRNA (cDNA clone MGC:168317 IMAGE:9020694), complete cds."	GenBank	1.71078	2.10251	-2.78408	-1.31196	0.014287	0.011282	down
TC11002199.hg.1	MRE11A	NM_005590	"Homo sapiens MRE11 meiotic recombination 11 homolog A (S. cerevisiae) (MRE11A), transcript variant 2, mRNA."	RefSeq	2.42022	2.81156	-2.9698	-1.31162	0.011798	0.007304	down
TC12000301.hg.1	ALG10	NM_032834	"Homo sapiens ALG10, alpha-1,2-glucosyltransferase (ALG10), mRNA."	RefSeq	2.69366	3.08498	-3.78589	-1.31159	0.006038	0.002462	down
TC15000292.hg.1	RAD51	NM_001164269	"Homo sapiens RAD51 homolog (S. cerevisiae) (RAD51), transcript variant 4, mRNA."	RefSeq	4.0737	4.46474	-3.04699	-1.31134	0.011009	0.007304	down
TC01002493.hg.1	SFPQ	NM_005066	"Homo sapiens splicing factor proline/glutamine-rich (SFPQ), mRNA."	RefSeq	5.09624	5.48698	-2.35023	-1.31106	0.022218	0.017021	down
TC17001251.hg.1	ULK2	NM_001142610	"Homo sapiens unc-51-like kinase 2 (C. elegans) (ULK2), transcript variant 2, mRNA."	RefSeq	2.01837	2.40887	-6.3281	-1.31084	0.001321	0	down
TC10000828.hg.1	NHLRC2	NM_198514	"Homo sapiens NHL repeat containing 2 (NHLRC2), mRNA."	RefSeq	5.50612	5.89565	-3.04588	-1.30997	0.011022	0.007304	down
TC10001347.hg.1	DNA2	NM_001080449	"Homo sapiens DNA replication helicase 2 homolog (yeast) (DNA2), transcript variant 1, mRNA."	RefSeq	2.11329	2.50251	-3.1448	-1.30968	0.01013	0.007304	down
TC08000412.hg.1	CHD7	NM_017780	"Homo sapiens chromodomain helicase DNA binding protein 7 (CHD7), mRNA."	RefSeq	3.20775	3.59688	-3.55889	-1.3096	0.007298	0.002462	down
TC01000134.hg.1	TARDBP	NM_007375	"Homo sapiens TAR DNA binding protein (TARDBP), mRNA."	RefSeq	4.53487	4.9231	-3.28737	-1.30878	0.009017	0.00432	down
TC10000479.hg.1	ADK	NM_001123	"Homo sapiens adenosine kinase (ADK), transcript variant 1, mRNA."	RefSeq	4.61228	5.00034	-3.23395	-1.30863	0.009392	0.00432	down
TC0X000966.hg.1	MED14	NM_004229	"Homo sapiens mediator complex subunit 14 (MED14), mRNA."	RefSeq	4.99611	5.38379	-5.45159	-1.30829	0.002116	0	down
TC03001271.hg.1	DYNC1LI1	NM_016141	"Homo sapiens dynein, cytoplasmic 1, light intermediate chain 1 (DYNC1LI1), mRNA."	RefSeq	4.23932	4.62659	-6.00645	-1.30791	0.001556	0	down
TC08001541.hg.1	TRPS1	NM_014112	"Homo sapiens trichorhinophalangeal syndrome I (TRPS1), mRNA."	RefSeq	1.73141	2.11853	-4.73477	-1.30778	0.003199	0.001369	down
TC02000665.hg.1	SULT1C4	NM_006588	"Homo sapiens sulfotransferase family, cytosolic, 1C, member 4 (SULT1C4), mRNA."	RefSeq	1.5949	1.98167	-7.95122	-1.30747	0.000595	0	down
TC0X000475.hg.1	CENPI	NM_006733	"Homo sapiens centromere protein I (CENPI), mRNA."	RefSeq	3.34807	3.73467	-4.9306	-1.3073	0.002842	0.001369	down
TC19001199.hg.1	ZNF443	NM_005815	"Homo sapiens zinc finger protein 443 (ZNF443), mRNA."	RefSeq	2.06241	2.44859	-3.78864	-1.30693	0.006006	0.002462	down
TC02002882.hg.1	USP40	NM_018218	"Homo sapiens ubiquitin specific peptidase 40 (USP40), mRNA."	RefSeq	2.97012	3.35595	-3.32519	-1.3066	0.008679	0.00432	down
TC06001948.hg.1	MAP3K7	NM_003188	"Homo sapiens mitogen-activated protein kinase kinase kinase 7 (MAP3K7), transcript variant A, mRNA."	RefSeq	4.44178	4.8275	-3.05483	-1.30652	0.010939	0.007304	down
TC07000112.hg.1	AHR	NM_001621	"Homo sapiens aryl hydrocarbon receptor (AHR), mRNA."	RefSeq	7.19347	7.57913	-4.72449	-1.30646	0.003211	0.001369	down
TC16000262.hg.1	RBBP6	NM_006910	"Homo sapiens retinoblastoma binding protein 6 (RBBP6), transcript variant 1, mRNA."	RefSeq	4.93676	5.3216	-3.17434	-1.30572	0.00992	0.00432	down
TC01001026.hg.1	TTF2	NM_003594	"Homo sapiens transcription termination factor, RNA polymerase II (TTF2), mRNA."	RefSeq	2.29209	2.67668	-4.71497	-1.30549	0.00325	0.001369	down
TC18000006.hg.1	TYMS	NM_001071	"Homo sapiens thymidylate synthetase (TYMS), mRNA."	RefSeq	6.28254	6.667	-5.08457	-1.30537	0.002651	0.001369	down
TC01006356.hg.1	EFCAB14	NM_014774	"Homo sapiens EF-hand calcium binding domain 14 (EFCAB14), mRNA."	RefSeq	6.08454	6.46876	-3.64272	-1.30516	0.00684	0.002462	down
TC12001723.hg.1	TSPAN8	NM_004616	"Homo sapiens tetraspanin 8 (TSPAN8), mRNA."	RefSeq	2.22133	2.60501	-3.59449	-1.30466	0.007139	0.002462	down
TC11000249.hg.1	ZDHHC13	NM_019028	"Homo sapiens zinc finger, DHHC-type containing 13 (ZDHHC13), transcript variant 1, mRNA."	RefSeq	4.25182	4.63472	-4.66244	-1.30396	0.003402	0.001369	down
TC16000448.hg.1	RBL2	NM_005611	"Homo sapiens retinoblastoma-like 2 (p130) (RBL2), mRNA."	RefSeq	5.01936	5.40208	-3.10331	-1.3038	0.010487	0.007304	down
TC07000726.hg.1	CFTR	NM_000492	"Homo sapiens cystic fibrosis transmembrane conductance regulator (ATP-binding cassette sub-family C, member 7) (CFTR), mRNA."	RefSeq	2.41963	2.80161	-3.86137	-1.30313	0.005751	0.002462	down
TC17001320.hg.1	GIT1	NM_001085454	"Homo sapiens G protein-coupled receptor kinase interacting ArfGAP 1 (GIT1), transcript variant 1, mRNA."	RefSeq	4.179	4.56029	-5.02961	-1.30251	0.002708	0.001369	down
TC04000626.hg.1	KIAA1109	NM_015312	"Homo sapiens KIAA1109 (KIAA1109), mRNA."	RefSeq	3.51607	3.89734	-2.03377	-1.30249	0.034083	0.026443	down
TC07002083.hg.1	NCAPG2	NM_017760	"Homo sapiens non-SMC condensin II complex, subunit G2 (NCAPG2), mRNA."	RefSeq	4.78979	5.171	-3.7851	-1.30243	0.00605	0.002462	down
TC01002819.hg.1	CTBS	NM_004388	"Homo sapiens chitobiase, di-N-acetyl- (CTBS), mRNA."	RefSeq	3.51902	3.90017	-4.22362	-1.30238	0.004554	0.001624	down
TC02002624.hg.1	STAT1	NM_007315	"Homo sapiens signal transducer and activator of transcription 1, 91kDa (STAT1), transcript variant alpha, mRNA."	RefSeq	5.23463	5.6156	-3.32735	-1.30222	0.008666	0.00432	down
TC01001692.hg.1	ZBED6	NM_001174108	"Homo sapiens zinc finger, BED-type containing 6 (ZBED6), mRNA."	RefSeq	5.58489	5.96551	-2.6279	-1.3019	0.016477	0.011282	down
TC16001154.hg.1	CNOT1	NM_016284	"Homo sapiens CCR4-NOT transcription complex, subunit 1 (CNOT1), transcript variant 1, mRNA."	RefSeq	6.82787	7.20848	-2.79326	-1.30189	0.014198	0.011282	down
TC15000864.hg.1	IQGAP1	NM_003870	"Homo sapiens IQ motif containing GTPase activating protein 1 (IQGAP1), mRNA."	RefSeq	6.85029	7.23064	-3.17877	-1.30166	0.009901	0.00432	down
TC04000416.hg.1	PARM1	NM_015393	"Homo sapiens prostate androgen-regulated mucin-like protein 1 (PARM1), mRNA."	RefSeq	7.91195	8.29222	-5.78914	-1.30159	0.001735	0	down
TC19000387.hg.1	ZNF430	NM_025189	"Homo sapiens zinc finger protein 430 (ZNF430), transcript variant 1, mRNA."	RefSeq	2.10069	2.4807	-3.80009	-1.30134	0.005955	0.002462	down
TC01000580.hg.1	TSPAN1	NM_005727	"Homo sapiens tetraspanin 1 (TSPAN1), mRNA."	RefSeq	5.77161	6.15154	-2.61317	-1.30128	0.016744	0.011282	down
TC01002412.hg.1	IFI6	NM_002038	"Homo sapiens interferon, alpha-inducible protein 6 (IFI6), transcript variant 1, mRNA."	RefSeq	5.78364	6.16349	-1.8316	-1.3012	0.046114	0.042387	down
TC06001027.hg.1	TNFAIP3	NM_006290	"Homo sapiens tumor necrosis factor, alpha-induced protein 3 (TNFAIP3), transcript variant 3, mRNA."	RefSeq	2.38342	2.76314	-3.5031	-1.30109	0.007616	0.002462	down
TC01001814.hg.1	IARS2	NM_018060	"Homo sapiens isoleucyl-tRNA synthetase 2, mitochondrial (IARS2), nuclear gene encoding mitochondrial protein, mRNA."	RefSeq	5.60136	5.98098	-4.34299	-1.301	0.004185	0.001369	down
TC09000029.hg.1	SLC1A1	NM_004170	"Homo sapiens solute carrier family 1 (neuronal/epithelial high affinity glutamate transporter, system Xag), member 1 (SLC1A1), mRNA."	RefSeq	4.95453	5.33342	-3.74342	-1.30034	0.006273	0.002462	down
TC15001323.hg.1	FKSG62	ENST00000557832	cdna:novel chromosome:GRCh37:15:47425693:47426320:-1 gene:ENSG00000259752 gene_biotype:protein_coding transcript_biotype:protein_coding	ENSEMBL	7.09784	7.4766	-4.04665	-1.30023	0.005089	0.001624	down
TC03002088.hg.1	RFC4	NM_002916	"Homo sapiens replication factor C (activator 1) 4, 37kDa (RFC4), transcript variant 1, mRNA."	RefSeq	4.05898	4.43754	-4.38437	-1.30004	0.004102	0.001369	down
TC12002032.hg.1	CIT	NM_001206999	"Homo sapiens citron (rho-interacting, serine/threonine kinase 21) (CIT), transcript variant 1, mRNA."	RefSeq	4.9017	5.28022	-2.6551	-1.30002	0.016031	0.011282	down
TC16002100.hg.1	NPIPB11	ENST00000357370	cdna:known chromosome:GRCh37:16:21846039:21868978:-1 gene:ENSG00000185864 gene_biotype:protein_coding transcript_biotype:protein_coding	ENSEMBL	8.17346	8.55198	-3.6324	-1.30001	0.006891	0.002462	down
TC14001036.hg.1	NFKBIA	NM_020529	"Homo sapiens nuclear factor of kappa light polypeptide gene enhancer in B-cells inhibitor, alpha (NFKBIA), mRNA."	RefSeq	5.33205	5.70972	-3.98886	-1.29924	0.005229	0.001624	down
TC01001012.hg.1	VANGL1	NM_138959	"Homo sapiens VANGL planar cell polarity protein 1 (VANGL1), transcript variant 1, mRNA."	RefSeq	4.77307	5.15073	-4.04948	-1.29923	0.005076	0.001624	down
TC16001283.hg.1	ADAT1	NM_012091	"Homo sapiens adenosine deaminase, tRNA-specific 1 (ADAT1), transcript variant 1, mRNA."	RefSeq	2.86357	3.24065	-3.96248	-1.2987	0.005363	0.001624	down
TC01000505.hg.1	RLF	NM_012421	"Homo sapiens rearranged L-myc fusion (RLF), mRNA."	RefSeq	4.15373	4.53067	-4.44875	-1.29858	0.003956	0.001369	down
TC01002717.hg.1	CYP2J2	NM_000775	"Homo sapiens cytochrome P450, family 2, subfamily J, polypeptide 2 (CYP2J2), mRNA."	RefSeq	5.08887	5.46573	-8.03542	-1.29851	0.000576	0	down
TC03000011.hg.1	LRRN1	NM_020873	"Homo sapiens leucine rich repeat neuronal 1 (LRRN1), mRNA."	RefSeq	1.91912	2.29484	-3.45528	-1.29749	0.00789	0.00432	down
TC04000480.hg.1	PKD2	NM_000297	"Homo sapiens polycystic kidney disease 2 (autosomal dominant) (PKD2), mRNA."	RefSeq	3.37602	3.75163	-2.80261	-1.29739	0.014064	0.011282	down
TC18000088.hg.1	SNRPD1	NM_006938	"Homo sapiens small nuclear ribonucleoprotein D1 polypeptide 16kDa (SNRPD1), mRNA."	RefSeq	5.78815	6.16376	-2.10145	-1.29739	0.030824	0.026443	down
TC0X000904.hg.1	CXorf23	NM_198279	"Homo sapiens chromosome X open reading frame 23 (CXorf23), mRNA."	RefSeq	1.74996	2.12484	-4.83564	-1.29672	0.00302	0.001369	down
TC14000056.hg.1	PNP	NM_000270	"Homo sapiens purine nucleoside phosphorylase (PNP), mRNA."	RefSeq	4.70977	5.08447	-3.36621	-1.29657	0.008437	0.00432	down
TC0X001176.hg.1	TAF9B	NM_015975	"Homo sapiens TAF9B RNA polymerase II, TATA box binding protein (TBP)-associated factor, 31kDa (TAF9B), mRNA."	RefSeq	3.90826	4.28239	-3.39836	-1.29606	0.00831	0.00432	down
TC03001854.hg.1	ATR	NM_001184	"Homo sapiens ataxia telangiectasia and Rad3 related (ATR), mRNA."	RefSeq	1.85286	2.22645	-3.32145	-1.29557	0.008698	0.00432	down
TC01004007.hg.1	HEATR1	NM_018072	"Homo sapiens HEAT repeat containing 1 (HEATR1), mRNA."	RefSeq	4.6019	4.97508	-2.89066	-1.2952	0.012836	0.007304	down
TC09000695.hg.1	SPTAN1	NM_001130438	"Homo sapiens spectrin, alpha, non-erythrocytic 1 (SPTAN1), transcript variant 1, mRNA."	RefSeq	5.76462	6.13741	-4.8835	-1.29485	0.002944	0.001369	down
TC07000932.hg.1	CASP2	NM_032982	"Homo sapiens caspase 2, apoptosis-related cysteine peptidase (CASP2), transcript variant 1, mRNA."	RefSeq	5.25583	5.6286	-4.81501	-1.29484	0.003052	0.001369	down
TC04000430.hg.1	2017-09-11	NM_018243	"Homo sapiens septin 11 (SEPT11), mRNA."	RefSeq	4.55368	4.92636	-4.68884	-1.29476	0.003294	0.001369	down
TC08002600.hg.1	HOOK3	NM_032410	"Homo sapiens hook homolog 3 (Drosophila) (HOOK3), mRNA."	RefSeq	3.9623	4.33495	-3.54091	-1.29473	0.007368	0.002462	down
TC09001673.hg.1	SETX	NM_015046	"Homo sapiens senataxin (SETX), mRNA."	RefSeq	3.38184	3.75442	-3.24029	-1.29467	0.009354	0.00432	down
TC09001375.hg.1	ZNF367	NM_153695	"Homo sapiens zinc finger protein 367 (ZNF367), mRNA."	RefSeq	3.24231	3.61419	-2.47818	-1.29404	0.019424	0.017021	down
TC05001408.hg.1	CENPK	NM_022145	"Homo sapiens centromere protein K (CENPK), transcript variant 1, mRNA."	RefSeq	2.38709	2.75869	-3.28654	-1.29379	0.009029	0.00432	down
TC02002773.hg.1	USP37	NM_020935	"Homo sapiens ubiquitin specific peptidase 37 (USP37), mRNA."	RefSeq	2.29352	2.66474	-2.65392	-1.29344	0.016044	0.011282	down
TC14001307.hg.1	NPC2	NM_006432	"Homo sapiens Niemann-Pick disease, type C2 (NPC2), mRNA."	RefSeq	6.73463	7.10583	-3.94271	-1.29343	0.005433	0.001624	down
TC01000889.hg.1	SNX7	NM_015976	"Homo sapiens sorting nexin 7 (SNX7), transcript variant 1, mRNA."	RefSeq	3.25148	3.6225	-4.38641	-1.29327	0.004096	0.001369	down
TC14001209.hg.1	SGPP1	NM_030791	"Homo sapiens sphingosine-1-phosphate phosphatase 1 (SGPP1), mRNA."	RefSeq	4.17018	4.54119	-2.89869	-1.29325	0.012734	0.007304	down
TC13000049.hg.1	TNFRSF19	NM_018647	"Homo sapiens tumor necrosis factor receptor superfamily, member 19 (TNFRSF19), transcript variant 1, mRNA."	RefSeq	2.37589	2.74685	-3.85351	-1.29321	0.005789	0.002462	down
TC12001755.hg.1	CSRP2	NM_001321	"Homo sapiens cysteine and glycine-rich protein 2 (CSRP2), mRNA."	RefSeq	2.81582	3.18652	-3.75331	-1.29298	0.006229	0.002462	down
TC03001632.hg.1	KIAA1524	NM_020890	"Homo sapiens KIAA1524 (KIAA1524), mRNA."	RefSeq	2.62304	2.99347	-3.34375	-1.29274	0.008558	0.00432	down
TC06001828.hg.1	DST	NM_001723	"Homo sapiens dystonin (DST), transcript variant 1e, mRNA."	RefSeq	2.30953	2.67824	-2.90365	-1.2912	0.012658	0.007304	down
TC02001195.hg.1	NBEAL1	NM_001114132	"Homo sapiens neurobeachin-like 1 (NBEAL1), mRNA."	RefSeq	2.49577	2.86425	-2.71361	-1.29099	0.015127	0.011282	down
TC22000248.hg.1	TIMP3	NM_000362	"Homo sapiens TIMP metallopeptidase inhibitor 3 (TIMP3), mRNA."	RefSeq	3.58751	3.95538	-2.91601	-1.29045	0.012441	0.007304	down
TC01000846.hg.1	CDC7	NM_001134420	"Homo sapiens cell division cycle 7 (CDC7), transcript variant 3, mRNA."	RefSeq	2.98137	3.34814	-3.27794	-1.28946	0.00908	0.00432	down
TC03001959.hg.1	SPTSSB	NM_001040100	"Homo sapiens serine palmitoyltransferase, small subunit B (SPTSSB), mRNA."	RefSeq	2.29473	2.66136	-4.32348	-1.28934	0.004255	0.001369	down
TC16000171.hg.1	MKL2	NM_014048	"Homo sapiens MKL/myocardin-like 2 (MKL2), mRNA."	RefSeq	4.65677	5.02324	-3.05793	-1.28919	0.010894	0.007304	down
TC03000221.hg.1	NKTR	NM_005385	"Homo sapiens natural killer-tumor recognition sequence (NKTR), mRNA."	RefSeq	2.89369	3.25973	-2.64415	-1.28881	0.016158	0.011282	down
TC15001296.hg.1	SPG11	NM_001160227	"Homo sapiens spastic paraplegia 11 (autosomal recessive) (SPG11), transcript variant 2, mRNA."	RefSeq	4.10904	4.47483	-3.59553	-1.28859	0.007113	0.002462	down
TC08000539.hg.1	CPNE3	NM_003909	"Homo sapiens copine III (CPNE3), mRNA."	RefSeq	5.1546	5.5199	-3.63133	-1.28815	0.00691	0.002462	down
TC14000397.hg.1	FUT8	NM_178155	"Homo sapiens fucosyltransferase 8 (alpha (1,6) fucosyltransferase) (FUT8), transcript variant 1, mRNA."	RefSeq	3.20942	3.57456	-4.48464	-1.28801	0.00381	0.001369	down
TC06000595.hg.1	PTK7	NM_002821	"Homo sapiens protein tyrosine kinase 7 (PTK7), transcript variant PTK7-1, mRNA."	RefSeq	3.61722	3.98214	-5.32109	-1.2878	0.002257	0	down
TC14000426.hg.1	TTC9	NM_015351	"Homo sapiens tetratricopeptide repeat domain 9 (TTC9), mRNA."	RefSeq	4.5502	4.91493	-2.00571	-1.28765	0.035484	0.026443	down
TC05000509.hg.1	FER	NM_005246	"Homo sapiens fer (fps/fes related) tyrosine kinase (FER), mRNA."	RefSeq	1.65814	2.02285	-3.20208	-1.28762	0.009691	0.00432	down
TC03000873.hg.1	SMC4	NM_001002800	"Homo sapiens structural maintenance of chromosomes 4 (SMC4), transcript variant 2, mRNA."	RefSeq	4.36321	4.72655	-2.81166	-1.28639	0.013899	0.007304	down
TC18000187.hg.1	C18orf54	NM_173529	"Homo sapiens chromosome 18 open reading frame 54 (C18orf54), mRNA."	RefSeq	2.977	3.34032	-3.75665	-1.28639	0.006203	0.002462	down
TC17001553.hg.1	BRCA1	NM_007294	"Homo sapiens breast cancer 1, early onset (BRCA1), transcript variant 1, mRNA."	RefSeq	3.01881	3.38188	-3.73656	-1.28616	0.006324	0.002462	down
TC02002166.hg.1	TGFBRAP1	NM_001142621	"Homo sapiens transforming growth factor, beta receptor associated protein 1 (TGFBRAP1), transcript variant 2, mRNA."	RefSeq	4.64441	5.00711	-3.27578	-1.28583	0.009099	0.00432	down
TC05000639.hg.1	RAD50	NM_005732	"Homo sapiens RAD50 homolog (S. cerevisiae) (RAD50), mRNA."	RefSeq	5.40969	5.77214	-3.07925	-1.2856	0.010678	0.007304	down
TC14000438.hg.1	RBM25	NM_021239	"Homo sapiens RNA binding motif protein 25 (RBM25), mRNA."	RefSeq	4.87633	5.23871	-2.86641	-1.28555	0.013192	0.007304	down
TC06000135.hg.1	SOX4	NM_003107	"Homo sapiens SRY (sex determining region Y)-box 4 (SOX4), mRNA."	RefSeq	5.75197	6.11415	-3.56855	-1.28537	0.007241	0.002462	down
TC01001838.hg.1	CAPN2	NM_001146068	"Homo sapiens calpain 2, (m/II) large subunit (CAPN2), transcript variant 2, mRNA."	RefSeq	5.46857	5.83058	-3.42346	-1.28521	0.008138	0.00432	down
TC03001533.hg.1	SUCLG2	NM_001177599	"Homo sapiens succinate-CoA ligase, GDP-forming, beta subunit (SUCLG2), nuclear gene encoding mitochondrial protein, transcript variant 1, mRNA."	RefSeq	4.15998	4.52176	-2.86117	-1.28501	0.013262	0.007304	down
TC11003470.hg.1	CHEK1	NM_001114121	"Homo sapiens checkpoint kinase 1 (CHEK1), transcript variant 2, mRNA."	RefSeq	4.1978	4.55908	-4.64563	-1.28457	0.003409	0.001369	down
TC13000899.hg.1	GAS6	NM_000820	"Homo sapiens growth arrest-specific 6 (GAS6), transcript variant 1, mRNA."	RefSeq	4.38621	4.74745	-4.78996	-1.28453	0.003084	0.001369	down
TC12000610.hg.1	CPSF6	NM_007007	"Homo sapiens cleavage and polyadenylation specific factor 6, 68kDa (CPSF6), mRNA."	RefSeq	4.96384	5.325	-3.19703	-1.28446	0.009742	0.00432	down
TC09002909.hg.1	NUP188	NM_015354	"Homo sapiens nucleoporin 188kDa (NUP188), mRNA."	RefSeq	3.98602	4.34694	-5.26879	-1.28425	0.002397	0	down
TC05000612.hg.1	SLC12A2	NM_001046	"Homo sapiens solute carrier family 12 (sodium/potassium/chloride transporters), member 2 (SLC12A2), transcript variant 1, mRNA."	RefSeq	7.5673	7.92783	-2.46654	-1.2839	0.019704	0.017021	down
TC11002062.hg.1	FCHSD2	NM_014824	"Homo sapiens FCH and double SH3 domains 2 (FCHSD2), mRNA."	RefSeq	3.23367	3.59405	-3.87189	-1.28376	0.005694	0.002462	down
TC17000341.hg.1	TAOK1	NM_020791	"Homo sapiens TAO kinase 1 (TAOK1), transcript variant 1, mRNA."	RefSeq	5.55281	5.91277	-2.16562	-1.28338	0.02845	0.026443	down
TC04000631.hg.1	SPATA5	NM_145207	"Homo sapiens spermatogenesis associated 5 (SPATA5), mRNA."	RefSeq	2.30191	2.66081	-3.4356	-1.28245	0.008024	0.00432	down
TC07001909.hg.1	ZC3HAV1L	NM_080660	"Homo sapiens zinc finger CCCH-type, antiviral 1-like (ZC3HAV1L), mRNA."	RefSeq	2.85025	3.20799	-4.97326	-1.28142	0.002778	0.001369	down
TC04000501.hg.1	PDLIM5	NM_001011513	"Homo sapiens PDZ and LIM domain 5 (PDLIM5), transcript variant 2, mRNA."	RefSeq	3.28512	3.64153	-4.57206	-1.28024	0.003625	0.001369	down
TC13000135.hg.1	NHLRC3	NM_001012754	"Homo sapiens NHL repeat containing 3 (NHLRC3), transcript variant 1, mRNA."	RefSeq	2.14754	2.50351	-3.88641	-1.27984	0.005637	0.001624	down
TC07001861.hg.1	TMEM209	NM_032842	"Homo sapiens transmembrane protein 209 (TMEM209), mRNA."	RefSeq	3.9902	4.34617	-3.87462	-1.27984	0.005675	0.002462	down
TC06004054.hg.1	SYNCRIP	NM_001159673	"Homo sapiens synaptotagmin binding, cytoplasmic RNA interacting protein (SYNCRIP), transcript variant 2, mRNA."	RefSeq	6.21633	6.57159	-4.51287	-1.27921	0.003759	0.001369	down
TC05001673.hg.1	STARD4	NM_139164	"Homo sapiens StAR-related lipid transfer (START) domain containing 4 (STARD4), mRNA."	RefSeq	2.1618	2.51643	-3.76754	-1.27866	0.006152	0.002462	down
TC05000538.hg.1	YTHDC2	NM_022828	"Homo sapiens YTH domain containing 2 (YTHDC2), mRNA."	RefSeq	2.94461	3.29899	-3.01987	-1.27844	0.011276	0.007304	down
TC0X000120.hg.1	POLA1	NM_016937	"Homo sapiens polymerase (DNA directed), alpha 1, catalytic subunit (POLA1), mRNA."	RefSeq	2.62048	2.97486	-2.16164	-1.27843	0.028577	0.026443	down
TC02001441.hg.1	MLPH	NM_001042467	"Homo sapiens melanophilin (MLPH), transcript variant 2, mRNA."	RefSeq	3.45875	3.81288	-3.73006	-1.27822	0.006381	0.002462	down
TC01003017.hg.1	TSPAN2	NM_005725	"Homo sapiens tetraspanin 2 (TSPAN2), mRNA."	RefSeq	1.65249	2.00647	-4.47009	-1.27808	0.003886	0.001369	down
TC10000820.hg.1	TCF7L2	NM_001146274	"Homo sapiens transcription factor 7-like 2 (T-cell specific, HMG-box) (TCF7L2), transcript variant 1, mRNA."	RefSeq	4.82286	5.17682	-4.20993	-1.27806	0.004586	0.001624	down
TC03001583.hg.1	VGLL3	NM_016206	"Homo sapiens vestigial like 3 (Drosophila) (VGLL3), mRNA."	RefSeq	1.58496	1.93879	-5.80297	-1.27795	0.001722	0	down
TC17002910.hg.1	HOXB6	NM_018952	"Homo sapiens homeobox B6 (HOXB6), mRNA."	RefSeq	4.25081	4.60438	-2.91653	-1.27772	0.012435	0.007304	down
TC01002095.hg.1	CCNL2	NM_001039577	"Homo sapiens cyclin L2 (CCNL2), transcript variant 2, mRNA."	RefSeq	3.7992	4.15204	-6.74137	-1.27707	0.001047	0	down
TC02000939.hg.1	RIF1	NM_001177663	"Homo sapiens RAP1 interacting factor homolog (yeast) (RIF1), transcript variant 2, mRNA."	RefSeq	2.529	2.88184	-2.53082	-1.27707	0.018374	0.011282	down
TC18000477.hg.1	PSTPIP2	NM_024430	"Homo sapiens proline-serine-threonine phosphatase interacting protein 2 (PSTPIP2), mRNA."	RefSeq	1.95705	2.30983	-3.77843	-1.27702	0.006088	0.002462	down
TC19000567.hg.1	SNRPA	NM_004596	"Homo sapiens small nuclear ribonucleoprotein polypeptide A (SNRPA), mRNA."	RefSeq	6.49577	6.84816	-2.25152	-1.27668	0.025204	0.017021	down
TC11000295.hg.1	ARL14EP	NM_152316	"Homo sapiens ADP-ribosylation factor-like 14 effector protein (ARL14EP), mRNA."	RefSeq	3.63208	3.98422	-2.25076	-1.27645	0.025229	0.017021	down
TC06001964.hg.1	PNISR	NM_015491	"Homo sapiens PNN-interacting serine/arginine-rich protein (PNISR), transcript variant 2, mRNA."	RefSeq	4.17182	4.52391	-3.21481	-1.27641	0.009558	0.00432	down
TC03001630.hg.1	IFT57	NM_018010	"Homo sapiens intraflagellar transport 57 homolog (Chlamydomonas) (IFT57), mRNA."	RefSeq	2.78744	3.13929	-6.07679	-1.2762	0.001505	0	down
TC16001318.hg.1	GINS2	NM_016095	"Homo sapiens GINS complex subunit 2 (Psf2 homolog) (GINS2), mRNA."	RefSeq	2.87878	3.22992	-4.07389	-1.27557	0.005013	0.001624	down
TC15001205.hg.1	DPH6	NM_001141972	"Homo sapiens ATP binding domain 4 (ATPBD4), transcript variant 2, mRNA."	RefSeq	1.69597	2.0462	-3.93705	-1.27477	0.005458	0.001624	down
TC06000128.hg.1	E2F3	NM_001243076	"Homo sapiens E2F transcription factor 3 (E2F3), transcript variant 2, mRNA."	RefSeq	2.30421	2.65434	-3.65553	-1.27468	0.00677	0.002462	down
TC04001634.hg.1	LRBA	NM_006726	"Homo sapiens LPS-responsive vesicle trafficking, beach and anchor containing (LRBA), transcript variant 2, mRNA."	RefSeq	5.05721	5.40701	-2.04374	-1.27438	0.033511	0.026443	down
TC09000738.hg.1	FUBP3	NM_003934	"Homo sapiens far upstream element (FUSE) binding protein 3 (FUBP3), mRNA."	RefSeq	4.97588	5.32524	-3.71633	-1.274	0.006464	0.002462	down
TC6_qbl_hap6000068.hg.1	MSH5	NM_002441	"Homo sapiens mutS homolog 5 (E. coli) (MSH5), transcript variant 3, mRNA."	RefSeq	3.65606	4.005	-4.26106	-1.27363	0.004446	0.001624	down
TC14001030.hg.1	BAZ1A	NM_182648	"Homo sapiens bromodomain adjacent to zinc finger domain, 1A (BAZ1A), transcript variant 2, mRNA."	RefSeq	3.26663	3.6152	-2.43878	-1.2733	0.020181	0.017021	down
TC06000640.hg.1	CENPQ	NM_018132	"Homo sapiens centromere protein Q (CENPQ), mRNA."	RefSeq	1.64802	1.99656	-2.91303	-1.27327	0.012492	0.007304	down
TC0X000053.hg.1	TMSB4X	NM_021109	"Homo sapiens thymosin beta 4, X-linked (TMSB4X), mRNA."	RefSeq	6.79547	7.14401	-1.65644	-1.27327	0.06064	0.064129	down
TC06001959.hg.1	MMS22L	NM_198468	"Homo sapiens MMS22-like, DNA repair protein (MMS22L), mRNA."	RefSeq	2.17159	2.52001	-3.72719	-1.27317	0.006407	0.002462	down
TC01002658.hg.1	ORC1	NM_001190818	"Homo sapiens origin recognition complex, subunit 1 (ORC1), transcript variant 2, mRNA."	RefSeq	3.03342	3.38156	-3.99463	-1.27292	0.005216	0.001624	down
TC12001355.hg.1	CAPRIN2	NM_001002259	"Homo sapiens caprin family member 2 (CAPRIN2), transcript variant 1, mRNA."	RefSeq	2.85895	3.20685	-2.85011	-1.27271	0.01337	0.007304	down
TC17001406.hg.1	ACACA	NM_198834	"Homo sapiens acetyl-CoA carboxylase alpha (ACACA), transcript variant 1, mRNA."	RefSeq	3.99896	4.3467	-3.51756	-1.27257	0.007508	0.002462	down
TC20000637.hg.1	ESF1	NM_016649	"Homo sapiens ESF1, nucleolar pre-rRNA processing protein, homolog (S. cerevisiae) (ESF1), transcript variant 1, mRNA."	RefSeq	2.38419	2.73179	-2.06277	-1.27244	0.032658	0.026443	down
TC08002590.hg.1	DOCK5	NM_024940	"Homo sapiens dedicator of cytokinesis 5 (DOCK5), mRNA."	RefSeq	5.20437	5.55191	-4.34276	-1.27239	0.004192	0.001369	down
TC12000239.hg.1	ETNK1	NM_001039481	"Homo sapiens ethanolamine kinase 1 (ETNK1), transcript variant 2, mRNA."	RefSeq	3.02641	3.37345	-2.30648	-1.27195	0.023447	0.017021	down
TC02000302.hg.1	FOXN2	NM_002158	"Homo sapiens forkhead box N2 (FOXN2), mRNA."	RefSeq	4.68074	5.02726	-4.38004	-1.27149	0.004109	0.001369	down
TC16002098.hg.1	NPIPB3	NM_130464	"Homo sapiens nuclear pore complex interacting protein-like 3 (NPIPL3), mRNA."	RefSeq	8.47322	8.81973	-3.72322	-1.27148	0.006432	0.002462	down
TC12001353.hg.1	IPO8	NM_001190995	"Homo sapiens importin 8 (IPO8), transcript variant 2, mRNA."	RefSeq	4.72837	5.0748	-3.24597	-1.27142	0.009278	0.00432	down
TC02001159.hg.1	SPATS2L	NM_001100422	"Homo sapiens spermatogenesis associated, serine-rich 2-like (SPATS2L), transcript variant 2, mRNA."	RefSeq	3.92501	4.27134	-5.84768	-1.27132	0.00169	0	down
TC10001673.hg.1	DCLRE1A	NM_014881	"Homo sapiens DNA cross-link repair 1A (DCLRE1A), transcript variant 2, mRNA."	RefSeq	2.80299	3.14927	-3.19291	-1.27128	0.009812	0.00432	down
TC11000947.hg.1	TMEM133	NM_032021	"Homo sapiens transmembrane protein 133 (TMEM133), mRNA."	RefSeq	2.21911	2.56537	-1.56964	-1.27126	0.070544	0.064129	down
TC01006324.hg.1	TMEM56	NM_001199679	"Homo sapiens transmembrane protein 56 (TMEM56), transcript variant 1, mRNA."	RefSeq	2.594	2.9402	-3.77842	-1.2712	0.006095	0.002462	down
TC12000237.hg.1	CMAS	NM_018686	"Homo sapiens cytidine monophosphate N-acetylneuraminic acid synthetase (CMAS), mRNA."	RefSeq	5.89324	6.23936	-2.80334	-1.27113	0.014045	0.011282	down
TC18000476.hg.1	EPG5	NM_020964	"Homo sapiens ectopic P-granules autophagy protein 5 homolog (C. elegans) (EPG5), mRNA."	RefSeq	3.10277	3.44871	-5.4218	-1.27097	0.002142	0	down
TC04000754.hg.1	FAM160A1	NM_001109977	"Homo sapiens family with sequence similarity 160, member A1 (FAM160A1), mRNA."	RefSeq	2.34611	2.69197	-4.17838	-1.27091	0.004714	0.001624	down
TC08000246.hg.1	WRN	NM_000553	"Homo sapiens Werner syndrome, RecQ helicase-like (WRN), mRNA."	RefSeq	2.71356	3.05936	-2.86681	-1.27085	0.013167	0.007304	down
TC12000890.hg.1	TPCN1	NM_001143819	"Homo sapiens two pore segment channel 1 (TPCN1), transcript variant 1, mRNA."	RefSeq	4.48233	4.82788	-3.23545	-1.27064	0.009379	0.00432	down
TC01002916.hg.1	SASS6	NM_194292	"Homo sapiens spindle assembly 6 homolog (C. elegans) (SASS6), mRNA."	RefSeq	2.81288	3.15841	-2.97682	-1.27061	0.011735	0.007304	down
TC14000361.hg.1	PCNXL4	NM_022495	"Homo sapiens pecanex-like 4 (Drosophila) (PCNXL4), mRNA."	RefSeq	4.70317	5.04831	-3.38191	-1.27027	0.008367	0.00432	down
TC10001756.hg.1	MKI67	NM_001145966	"Homo sapiens antigen identified by monoclonal antibody Ki-67 (MKI67), transcript variant 2, mRNA."	RefSeq	6.43953	6.78459	-3.36302	-1.2702	0.00845	0.00432	down
TC15002807.hg.1	KIAA0101	NM_001029989	"Homo sapiens KIAA0101 (KIAA0101), transcript variant 2, mRNA."	RefSeq	3.9066	4.2516	-2.82614	-1.27016	0.013657	0.007304	down
TC03000149.hg.1	TGFBR2	NM_001024847	"Homo sapiens transforming growth factor, beta receptor II (70/80kDa) (TGFBR2), transcript variant 1, mRNA."	RefSeq	6.10743	6.45226	-4.26192	-1.27	0.00444	0.001624	down
TC01000859.hg.1	MTF2	NM_001164391	"Homo sapiens metal response element binding transcription factor 2 (MTF2), transcript variant 3, mRNA."	RefSeq	2.53292	2.87775	-2.73698	-1.27	0.014847	0.011282	down
TC0X000872.hg.1	FANCB	NM_001018113	"Homo sapiens Fanconi anemia, complementation group B (FANCB), transcript variant 1, mRNA."	RefSeq	1.6434	1.98801	-3.00647	-1.26981	0.01141	0.007304	down
TC14000568.hg.1	CPSF2	NM_017437	"Homo sapiens cleavage and polyadenylation specific factor 2, 100kDa (CPSF2), mRNA."	RefSeq	5.15245	5.49629	-2.87208	-1.26913	0.013071	0.007304	down
TC01003887.hg.1	LBR	NM_002296	"Homo sapiens lamin B receptor (LBR), transcript variant 1, mRNA."	RefSeq	5.39937	5.74285	-4.29257	-1.26881	0.00437	0.001369	down
TC17000402.hg.1	TAF15	NM_139215	"Homo sapiens TAF15 RNA polymerase II, TATA box binding protein (TBP)-associated factor, 68kDa (TAF15), transcript variant 1, mRNA."	RefSeq	6.84797	7.19129	-2.60574	-1.26868	0.016871	0.011282	down
TC02000705.hg.1	ZC3H6	NM_198581	"Homo sapiens zinc finger CCCH-type containing 6 (ZC3H6), mRNA."	RefSeq	3.03048	3.37368	-2.68162	-1.26856	0.015554	0.011282	down
TC08000188.hg.1	SLC25A37	NM_016612	"Homo sapiens solute carrier family 25 (mitochondrial iron transporter), member 37 (SLC25A37), nuclear gene encoding mitochondrial protein, mRNA."	RefSeq	5.03419	5.37709	-3.75465	-1.26831	0.006216	0.002462	down
TC17001772.hg.1	MED13	NM_005121	"Homo sapiens mediator complex subunit 13 (MED13), mRNA."	RefSeq	5.78022	6.12305	-1.80175	-1.26824	0.048291	0.042387	down
TC20000092.hg.1	SPTLC3	NM_018327	"Homo sapiens serine palmitoyltransferase, long chain base subunit 3 (SPTLC3), mRNA."	RefSeq	5.35951	5.70177	-2.93878	-1.26774	0.012161	0.007304	down
TC08000829.hg.1	ZNF623	ENST00000532796	[retired] cdna:known chromosome:GRCh37:8:144731830:144738588:1 gene:ENSG00000183309 gene_biotype:protein_coding transcript_biotype:protein_coding	ENSEMBL	1.93564	2.27746	-3.37881	-1.26735	0.008412	0.00432	down
TC0X000388.hg.1	OGT	NM_181672	"Homo sapiens O-linked N-acetylglucosamine (GlcNAc) transferase (OGT), transcript variant 1, mRNA."	RefSeq	6.06791	6.40971	-3.04833	-1.26734	0.01099	0.007304	down
TC0X000783.hg.1	BRCC3	NM_001018055	"Homo sapiens BRCA1/BRCA2-containing complex, subunit 3 (BRCC3), transcript variant 2, mRNA."	RefSeq	3.64869	3.99032	-2.15153	-1.26719	0.028947	0.026443	down
TC10001309.hg.1	ZWINT	NM_032997	"Homo sapiens ZW10 interactor, kinetochore protein (ZWINT), transcript variant 2, mRNA."	RefSeq	3.57725	3.91887	-5.91111	-1.26718	0.001645	0	down
TC15002758.hg.1	CKMT1B	NM_020990	"Homo sapiens creatine kinase, mitochondrial 1B (CKMT1B), nuclear gene encoding mitochondrial protein, mRNA."	RefSeq	1.99145	2.33303	-3.60891	-1.26715	0.007056	0.002462	down
TC06000925.hg.1	KPNA5	NM_002269	"Homo sapiens karyopherin alpha 5 (importin alpha 6) (KPNA5), mRNA."	RefSeq	1.98259	2.32416	-2.84471	-1.26714	0.013428	0.007304	down
TC16001357.hg.1	FANCA	NM_000135	"Homo sapiens Fanconi anemia, complementation group A (FANCA), transcript variant 1, mRNA."	RefSeq	2.66444	3.00591	-5.64644	-1.26704	0.001894	0	down
TC19000425.hg.1	ZNF507	NM_001136156	"Homo sapiens zinc finger protein 507 (ZNF507), transcript variant 1, mRNA."	RefSeq	2.93849	3.27919	-3.62372	-1.26637	0.006954	0.002462	down
TC05001274.hg.1	C5orf42	NM_023073	"Homo sapiens chromosome 5 open reading frame 42 (C5orf42), mRNA."	RefSeq	1.62915	1.96924	-5.06389	-1.26584	0.002677	0.001369	down
TC11000090.hg.1	RRM1	NM_001033	"Homo sapiens ribonucleotide reductase M1 (RRM1), mRNA."	RefSeq	6.7477	7.08763	-4.20085	-1.26569	0.004624	0.001624	down
TC15000844.hg.1	ABHD2	NM_007011	"Homo sapiens abhydrolase domain containing 2 (ABHD2), transcript variant 1, mRNA."	RefSeq	4.41587	4.75553	-6.33022	-1.26546	0.001314	0	down
TC6_cox_hap2000033.hg.1	TRIM15	NM_033229	"Homo sapiens tripartite motif containing 15 (TRIM15), mRNA."	RefSeq	2.67206	3.01056	-3.217	-1.26444	0.009539	0.00432	down
TC6_apd_hap1000025.hg.1	TRIM15	NM_033229	"Homo sapiens tripartite motif containing 15 (TRIM15), mRNA."	RefSeq	2.67704	3.01539	-3.45501	-1.26431	0.007909	0.00432	down
TC6_dbb_hap3000026.hg.1	TRIM15	NM_033229	"Homo sapiens tripartite motif containing 15 (TRIM15), mRNA."	RefSeq	2.67704	3.01539	-3.45501	-1.26431	0.007909	0.00432	down
TC6_mann_hap4000028.hg.1	TRIM15	NM_033229	"Homo sapiens tripartite motif containing 15 (TRIM15), mRNA."	RefSeq	2.67704	3.01539	-3.45501	-1.26431	0.007909	0.00432	down
TC11001829.hg.1	PATL1	NM_152716	"Homo sapiens protein associated with topoisomerase II homolog 1 (yeast) (PATL1), mRNA."	RefSeq	6.76861	7.10688	-4.68435	-1.26424	0.0033	0.001369	down
TC01002775.hg.1	ZRANB2	NM_005455	"Homo sapiens zinc finger, RAN-binding domain containing 2 (ZRANB2), transcript variant 2, mRNA."	RefSeq	3.40908	3.74692	-3.19397	-1.26386	0.009799	0.00432	down
TC17000861.hg.1	ITGB4	NM_000213	"Homo sapiens integrin, beta 4 (ITGB4), transcript variant 1, mRNA."	RefSeq	5.80251	6.14005	-2.36488	-1.2636	0.021868	0.017021	down
TC07000607.hg.1	ZKSCAN1	NM_003439	"Homo sapiens zinc finger with KRAB and SCAN domains 1 (ZKSCAN1), mRNA."	RefSeq	4.38558	4.72301	-3.02744	-1.2635	0.011174	0.007304	down
TC19000705.hg.1	SULT2B1	NM_004605	"Homo sapiens sulfotransferase family, cytosolic, 2B, member 1 (SULT2B1), transcript variant 1, mRNA."	RefSeq	3.90987	4.2472	-2.12851	-1.26341	0.029806	0.026443	down
TC01000849.hg.1	EPHX4	NM_173567	"Homo sapiens epoxide hydrolase 4 (EPHX4), mRNA."	RefSeq	1.81117	2.14834	-5.45026	-1.26327	0.002123	0	down
TC07000930.hg.1	GSTK1	NM_001143679	"Homo sapiens glutathione S-transferase kappa 1 (GSTK1), nuclear gene encoding mitochondrial protein, transcript variant 2, mRNA."	RefSeq	3.74118	4.07808	-3.69269	-1.26304	0.006579	0.002462	down
TC05000928.hg.1	SPDL1	NM_017785	"Homo sapiens spindle apparatus coiled-coil protein 1 (SPDL1), mRNA."	RefSeq	1.71082	2.04702	-4.96444	-1.26242	0.002798	0.001369	down
TC01006315.hg.1	SEPN1	NM_020451	"Homo sapiens selenoprotein N, 1 (SEPN1), transcript variant 1, mRNA."	RefSeq	4.51964	4.85565	-3.77849	-1.26226	0.006082	0.002462	down
TC0X000118.hg.1	PDK3	NM_001142386	"Homo sapiens pyruvate dehydrogenase kinase, isozyme 3 (PDK3), nuclear gene encoding mitochondrial protein, transcript variant 1, mRNA."	RefSeq	3.31739	3.65323	-4.23357	-1.26212	0.004535	0.001624	down
TC07000058.hg.1	CCZ1	NM_015622	"Homo sapiens CCZ1 vacuolar protein trafficking and biogenesis associated homolog (S. cerevisiae) (CCZ1), mRNA."	RefSeq	4.59965	4.93517	-3.35703	-1.26183	0.008488	0.00432	down
TC19000532.hg.1	ACTN4	NM_004924	"Homo sapiens actinin, alpha 4 (ACTN4), mRNA."	RefSeq	8.3661	8.70151	-2.7781	-1.26173	0.014402	0.011282	down
TC02001035.hg.1	CDCA7	NM_031942	"Homo sapiens cell division cycle associated 7 (CDCA7), transcript variant 1, mRNA."	RefSeq	2.80914	3.14412	-3.20003	-1.26136	0.009704	0.00432	down
TC02000409.hg.1	GMCL1	NM_178439	"Homo sapiens germ cell-less, spermatogenesis associated 1 (GMCL1), mRNA."	RefSeq	5.00931	5.3439	-3.53336	-1.26102	0.007406	0.002462	down
TC09000597.hg.1	TRIM32	NM_001099679	"Homo sapiens tripartite motif containing 32 (TRIM32), transcript variant 2, mRNA."	RefSeq	4.02682	4.36011	-2.28528	-1.25988	0.024083	0.017021	down
TC06001770.hg.1	ENPP5	NM_021572	"Homo sapiens ectonucleotide pyrophosphatase/phosphodiesterase 5 (putative) (ENPP5), mRNA."	RefSeq	2.68206	3.01498	-3.58854	-1.25956	0.007171	0.002462	down
TC18000521.hg.1	MBD2	NM_003927	"Homo sapiens methyl-CpG binding domain protein 2 (MBD2), transcript variant 1, mRNA."	RefSeq	7.53415	7.86651	-3.01262	-1.25908	0.011353	0.007304	down
TC19002672.hg.1	LRG1	NM_052972	"Homo sapiens leucine-rich alpha-2-glycoprotein 1 (LRG1), mRNA."	RefSeq	2.27777	2.60959	-1.85617	-1.2586	0.044332	0.042387	down
TC02001121.hg.1	NAB1	NM_005966	"Homo sapiens NGFI-A binding protein 1 (EGR1 binding protein 1) (NAB1), mRNA."	RefSeq	3.82234	4.15409	-4.7017	-1.25854	0.003275	0.001369	down
TC03000634.hg.1	PARP14	NM_017554	"Homo sapiens poly (ADP-ribose) polymerase family, member 14 (PARP14), mRNA."	RefSeq	4.56399	4.8956	-2.51971	-1.25842	0.018571	0.011282	down
TC03000976.hg.1	ATP11B	NM_014616	"Homo sapiens ATPase, class VI, type 11B (ATP11B), mRNA."	RefSeq	5.62534	5.9569	-2.67872	-1.25837	0.015624	0.011282	down
TC15000290.hg.1	CASC5	NM_144508	"Homo sapiens cancer susceptibility candidate 5 (CASC5), transcript variant 2, mRNA."	RefSeq	3.68517	4.01653	-2.70977	-1.25819	0.015178	0.011282	down
TC19001475.hg.1	ZNF850	NM_001193552	"Homo sapiens zinc finger protein 850 (ZNF850), transcript variant 1, mRNA."	RefSeq	3.30158	3.63286	-2.77117	-1.25813	0.014484	0.011282	down
TC03000429.hg.1	EBLN2	BC064501	"Homo sapiens hypothetical protein FLJ10213, mRNA (cDNA clone MGC:71205 IMAGE:6215884), complete cds."	GenBank	1.62644	1.95769	-2.84673	-1.2581	0.013396	0.007304	down
TC01000582.hg.1	RAD54L	NM_001142548	"Homo sapiens RAD54-like (S. cerevisiae) (RAD54L), transcript variant 2, mRNA."	RefSeq	2.81784	3.14905	-3.31593	-1.25806	0.008736	0.00432	down
TC01003536.hg.1	RC3H1	NM_172071	"Homo sapiens ring finger and CCCH-type domains 1 (RC3H1), mRNA."	RefSeq	4.78011	5.1113	-2.673	-1.25805	0.015751	0.011282	down
TC17000492.hg.1	RAPGEFL1	NM_016339	"Homo sapiens Rap guanine nucleotide exchange factor (GEF)-like 1 (RAPGEFL1), mRNA."	RefSeq	2.86123	3.19231	-4.61895	-1.25795	0.003472	0.001369	down
TC06001091.hg.1	PPP1R14C	NM_030949	"Homo sapiens protein phosphatase 1, regulatory (inhibitor) subunit 14C (PPP1R14C), mRNA."	RefSeq	1.60677	1.93762	-3.83977	-1.25776	0.005815	0.002462	down
TC15001441.hg.1	DMXL2	NM_001174116	"Homo sapiens Dmx-like 2 (DMXL2), transcript variant 1, mRNA."	RefSeq	3.64752	3.97809	-2.4981	-1.25751	0.018991	0.017021	down
TC12001865.hg.1	UHRF1BP1L	NM_001006947	"Homo sapiens UHRF1 binding protein 1-like (UHRF1BP1L), transcript variant 2, mRNA."	RefSeq	2.42593	2.75596	-2.52226	-1.25704	0.018514	0.011282	down
TC11002284.hg.1	PPP2R1B	NM_001177562	"Homo sapiens protein phosphatase 2, regulatory subunit A, beta (PPP2R1B), transcript variant 4, mRNA."	RefSeq	3.99991	4.32979	-3.96322	-1.25691	0.005356	0.001624	down
TC15001507.hg.1	RORA	NM_002943	"Homo sapiens RAR-related orphan receptor A (RORA), transcript variant 3, mRNA."	RefSeq	5.20389	5.53359	-2.98509	-1.25675	0.011658	0.007304	down
TC14000922.hg.1	METTL3	NM_019852	"Homo sapiens methyltransferase like 3 (METTL3), mRNA."	RefSeq	4.04178	4.37143	-4.28711	-1.25671	0.004389	0.001369	down
TC06001050.hg.1	AIG1	NM_016108	"Homo sapiens androgen-induced 1 (AIG1), mRNA."	RefSeq	4.25666	4.58627	-4.7369	-1.25667	0.003192	0.001369	down
TC10000731.hg.1	SFXN3	NM_030971	"Homo sapiens sideroflexin 3 (SFXN3), mRNA."	RefSeq	3.74557	4.07509	-3.32281	-1.2566	0.008692	0.00432	down
TC03002118.hg.1	MB21D2	NM_178496	"Homo sapiens Mab-21 domain containing 2 (MB21D2), mRNA."	RefSeq	4.26821	4.59732	-1.87942	-1.25625	0.042689	0.042387	down
TC19000389.hg.1	ZNF431	NM_133473	"Homo sapiens zinc finger protein 431 (ZNF431), mRNA."	RefSeq	2.91759	3.24647	-3.30424	-1.25603	0.008851	0.00432	down
TC07000463.hg.1	GATSL1	NM_001145063	"Homo sapiens GATS protein-like 1 (GATSL1), mRNA."	RefSeq	4.0924	4.42127	-2.44259	-1.25602	0.020086	0.017021	down
TC05000497.hg.1	PAM	NM_000919	"Homo sapiens peptidylglycine alpha-amidating monooxygenase (PAM), transcript variant 1, mRNA."	RefSeq	3.01781	3.34629	-3.87466	-1.25569	0.005668	0.002462	down
TC09000495.hg.1	ANP32B	NM_006401	"Homo sapiens acidic (leucine-rich) nuclear phosphoprotein 32 family, member B (ANP32B), mRNA."	RefSeq	6.03172	6.35957	-4.72349	-1.25514	0.003224	0.001369	down
TC01003876.hg.1	PARP1	NM_001618	"Homo sapiens poly (ADP-ribose) polymerase 1 (PARP1), mRNA."	RefSeq	5.19467	5.52252	-5.85684	-1.25514	0.001671	0	down
TC11001064.hg.1	KMT2A	NM_001197104	"Homo sapiens myeloid/lymphoid or mixed-lineage leukemia (trithorax homolog, Drosophila) (MLL), transcript variant 1, mRNA."	RefSeq	5.29393	5.62165	-3.76252	-1.25503	0.006171	0.002462	down
TC10000047.hg.1	NET1	NM_001047160	"Homo sapiens neuroepithelial cell transforming 1 (NET1), transcript variant 1, mRNA."	RefSeq	6.62621	6.9539	-5.42892	-1.255	0.002136	0	down
TC08001293.hg.1	ARFGEF1	NM_006421	"Homo sapiens ADP-ribosylation factor guanine nucleotide-exchange factor 1 (brefeldin A-inhibited) (ARFGEF1), mRNA."	RefSeq	4.11487	4.44221	-2.10689	-1.2547	0.030576	0.026443	down
TC15000868.hg.1	BLM	NM_000057	"Homo sapiens Bloom syndrome, RecQ helicase-like (BLM), mRNA."	RefSeq	2.71598	3.04328	-3.70169	-1.25466	0.006547	0.002462	down
TC05001947.hg.1	ANXA6	NM_001155	"Homo sapiens annexin A6 (ANXA6), transcript variant 1, mRNA."	RefSeq	4.85433	5.18084	-1.4638	-1.25398	0.084497	0.103127	down
TC16000239.hg.1	UQCRC2	NM_003366	"Homo sapiens ubiquinol-cytochrome c reductase core protein II (UQCRC2), nuclear gene encoding mitochondrial protein, mRNA."	RefSeq	7.02752	7.35328	-4.19093	-1.25332	0.004675	0.001624	down
TC0X000141.hg.1	GK	NM_000167	"Homo sapiens glycerol kinase (GK), transcript variant 2, mRNA."	RefSeq	2.12518	2.45093	-4.33866	-1.25332	0.004204	0.001369	down
TC11001387.hg.1	TRIM66	NM_014818	"Homo sapiens tripartite motif containing 66 (TRIM66), mRNA."	RefSeq	2.03326	2.35855	-3.11246	-1.25292	0.010423	0.007304	down
TC02002492.hg.1	GALNT3	NM_004482	"Homo sapiens UDP-N-acetyl-alpha-D-galactosamine:polypeptide N-acetylgalactosaminyltransferase 3 (GalNAc-T3) (GALNT3), mRNA."	RefSeq	4.34546	4.67071	-3.50363	-1.25289	0.00761	0.002462	down
TC01000702.hg.1	NFIA	NM_001134673	"Homo sapiens nuclear factor I/A (NFIA), transcript variant 1, mRNA."	RefSeq	4.14182	4.46682	-4.19805	-1.25266	0.004644	0.001624	down
TC16002095.hg.1	NPIPB5	NM_001135865	"Homo sapiens nuclear pore complex interacting protein related gene (LOC100132247), mRNA."	RefSeq	8.37738	8.70206	-3.8444	-1.25239	0.005802	0.002462	down
TC09001342.hg.1	ZNF484	NM_031486	"Homo sapiens zinc finger protein 484 (ZNF484), transcript variant 1, mRNA."	RefSeq	1.99981	2.32393	-1.89387	-1.2519	0.041754	0.042387	down
TC21000535.hg.1	UBE2G2	NM_001202489	"Homo sapiens ubiquitin-conjugating enzyme E2G 2 (UBE2G2), transcript variant 3, mRNA."	RefSeq	2.90075	3.22472	-5.97837	-1.25177	0.001582	0	down
TC06000384.hg.1	HSPA1A	NM_005345	"Homo sapiens heat shock 70kDa protein 1A (HSPA1A), mRNA."	RefSeq	4.62811	4.95194	-2.5623	-1.25165	0.01775	0.011282	down
TC16001004.hg.1	NPIPL3	ENST00000354563	cdna:known chromosome:GRCh37:16:29495010:29499154:-1 gene:ENSG00000169203 gene_biotype:protein_coding transcript_biotype:protein_coding	ENSEMBL	7.14663	7.47044	-2.67088	-1.25163	0.015783	0.011282	down
TC14000948.hg.1	ACIN1	NM_001164814	"Homo sapiens apoptotic chromatin condensation inducer 1 (ACIN1), transcript variant 2, mRNA."	RefSeq	4.04053	4.36377	-6.83518	-1.25114	0.001009	0	down
TC17000973.hg.1	CRK	NM_005206	"Homo sapiens v-crk sarcoma virus CT10 oncogene homolog (avian) (CRK), transcript variant I, mRNA."	RefSeq	5.91526	6.23827	-2.87259	-1.25094	0.013052	0.007304	down
TC11000854.hg.1	C11orf82	NM_145018	"Homo sapiens chromosome 11 open reading frame 82 (C11orf82), mRNA."	RefSeq	2.05694	2.37963	-3.75022	-1.25066	0.006241	0.002462	down
TC6_qbl_hap6000026.hg.1	TRIM15	NM_033229	"Homo sapiens tripartite motif containing 15 (TRIM15), mRNA."	RefSeq	2.67359	2.9959	-2.84688	-1.25034	0.01339	0.007304	down
TC19001764.hg.1	KLK6	NM_001012964	"Homo sapiens kallikrein-related peptidase 6 (KLK6), transcript variant B, mRNA."	RefSeq	7.77525	8.09738	-1.79396	-1.25017	0.048902	0.042387	down
TC16002049.hg.1	NME4	NM_005009	"Homo sapiens NME/NM23 nucleoside diphosphate kinase 4 (NME4), nuclear gene encoding mitochondrial protein, mRNA."	RefSeq	2.99666	3.31765	-3.8076	-1.24918	0.005929	0.002462	down
TC22001460.hg.1	GGT1	NM_005265	"Homo sapiens gamma-glutamyltransferase 1 (GGT1), transcript variant 1, mRNA."	RefSeq	4.60969	4.93009	-3.24952	-1.24868	0.009265	0.00432	down
TC02001974.hg.1	PAIP2B	NM_020459	"Homo sapiens poly(A) binding protein interacting protein 2B (PAIP2B), mRNA."	RefSeq	3.80748	4.12786	-2.25815	-1.24866	0.025032	0.017021	down
TC12001554.hg.1	CALCOCO1	NM_001143682	"Homo sapiens calcium binding and coiled-coil domain 1 (CALCOCO1), transcript variant 2, mRNA."	RefSeq	2.85335	3.17368	-3.9705	-1.24861	0.005312	0.001624	down
TC19001588.hg.1	ETHE1	NM_014297	"Homo sapiens ethylmalonic encephalopathy 1 (ETHE1), nuclear gene encoding mitochondrial protein, mRNA."	RefSeq	6.08132	6.40129	-2.17265	-1.2483	0.028215	0.026443	down
TC02000230.hg.1	CRIM1	NM_016441	"Homo sapiens cysteine rich transmembrane BMP regulator 1 (chordin-like) (CRIM1), mRNA."	RefSeq	6.38521	6.70517	-5.882	-1.24829	0.001658	0	down
TC14001141.hg.1	ERO1L	NM_014584	"Homo sapiens ERO1-like (S. cerevisiae) (ERO1L), mRNA."	RefSeq	7.09762	7.41745	-3.25118	-1.24818	0.009252	0.00432	down
TC07001605.hg.1	SAMD9	NM_001193307	"Homo sapiens sterile alpha motif domain containing 9 (SAMD9), transcript variant 2, mRNA."	RefSeq	1.58496	1.90478	-3.03645	-1.24817	0.011111	0.007304	down
TC02001741.hg.1	CEBPZ	NM_005760	"Homo sapiens CCAAT/enhancer binding protein (C/EBP), zeta (CEBPZ), mRNA."	RefSeq	4.9115	5.23127	-2.52181	-1.24813	0.01852	0.011282	down
TC01001758.hg.1	TRAF5	NM_001033910	"Homo sapiens TNF receptor-associated factor 5 (TRAF5), transcript variant 3, mRNA."	RefSeq	1.88311	2.20286	-3.26322	-1.24812	0.009157	0.00432	down
TC01002340.hg.1	HNRNPR	NM_001102397	"Homo sapiens heterogeneous nuclear ribonucleoprotein R (HNRNPR), transcript variant 4, mRNA."	RefSeq	5.33278	5.65248	-2.59469	-1.24807	0.017158	0.011282	down
TC08001427.hg.1	RBM12B	NM_203390	"Homo sapiens RNA binding motif protein 12B (RBM12B), mRNA."	RefSeq	3.59056	3.90982	-2.45276	-1.24769	0.019933	0.017021	down
TC01003629.hg.1	IVNS1ABP	NM_006469	"Homo sapiens influenza virus NS1A binding protein (IVNS1ABP), mRNA."	RefSeq	4.52177	4.84097	-2.67498	-1.24764	0.015719	0.011282	down
TC07003339.hg.1	CAV1	NM_001172895	"Homo sapiens caveolin 1, caveolae protein, 22kDa (CAV1), transcript variant 2, mRNA."	RefSeq	3.19294	3.512	-3.21031	-1.24751	0.009609	0.00432	down
TC17000194.hg.1	MPRIP	NM_015134	"Homo sapiens myosin phosphatase Rho interacting protein (MPRIP), transcript variant 1, mRNA."	RefSeq	5.55491	5.87383	-4.5562	-1.2474	0.003657	0.001369	down
TC03001402.hg.1	LAMB2	NM_002292	"Homo sapiens laminin, beta 2 (laminin S) (LAMB2), mRNA."	RefSeq	4.52752	4.84642	-3.738	-1.24738	0.006305	0.002462	down
TC13000190.hg.1	RB1	NM_000321	"Homo sapiens retinoblastoma 1 (RB1), mRNA."	RefSeq	5.51197	5.83087	-3.27385	-1.24738	0.009118	0.00432	down
TC14000786.hg.1	TRAF3	NM_001199427	"Homo sapiens TNF receptor-associated factor 3 (TRAF3), transcript variant 4, mRNA."	RefSeq	4.55353	4.87218	-5.38096	-1.24716	0.002206	0	down
TC0X000941.hg.1	TAB3	NM_152787	"Homo sapiens TGF-beta activated kinase 1/MAP3K7 binding protein 3 (TAB3), mRNA."	RefSeq	3.67883	3.99727	-3.85785	-1.24698	0.005777	0.002462	down
TC0X001359.hg.1	ZNF280C	NM_017666	"Homo sapiens zinc finger protein 280C (ZNF280C), mRNA."	RefSeq	3.25206	3.56949	-2.24387	-1.24612	0.025439	0.017021	down
TC02000668.hg.1	RANBP2	NM_006267	"Homo sapiens RAN binding protein 2 (RANBP2), mRNA."	RefSeq	5.54989	5.86678	-1.82012	-1.24564	0.046929	0.042387	down
TC01001516.hg.1	DARS2	NM_018122	"Homo sapiens aspartyl-tRNA synthetase 2, mitochondrial (DARS2), nuclear gene encoding mitochondrial protein, mRNA."	RefSeq	3.70325	4.01981	-4.47905	-1.24535	0.003854	0.001369	down
TC0X000652.hg.1	DDX26B	NM_182540	"Homo sapiens DEAD/H (Asp-Glu-Ala-Asp/His) box polypeptide 26B (DDX26B), mRNA."	RefSeq	1.58496	1.90128	-7.54454	-1.24514	0.000697	0	down
TC0X001182.hg.1	BRWD3	NM_153252	"Homo sapiens bromodomain and WD repeat domain containing 3 (BRWD3), mRNA."	RefSeq	3.22373	3.53981	-3.41152	-1.24494	0.008227	0.00432	down
TC02000360.hg.1	EHBP1	NM_001142614	"Homo sapiens EH domain binding protein 1 (EHBP1), transcript variant 2, mRNA."	RefSeq	3.33807	3.65381	-4.33766	-1.24465	0.004211	0.001369	down
TC6_mann_hap4000068.hg.1	MSH5	NM_002441	"Homo sapiens mutS homolog 5 (E. coli) (MSH5), transcript variant 3, mRNA."	RefSeq	4.00805	4.32376	-3.24052	-1.24462	0.009348	0.00432	down
TC06004056.hg.1	GOPC	NM_001017408	"Homo sapiens golgi-associated PDZ and coiled-coil motif containing (GOPC), transcript variant 2, mRNA."	RefSeq	5.95266	6.26748	-2.8372	-1.24386	0.013517	0.007304	down
TC01001138.hg.1	LOC100132999	BC150590	"Homo sapiens cDNA clone MGC:183500 IMAGE:9056960, complete cds."	GenBank	4.04115	4.35556	-3.40963	-1.2435	0.008246	0.00432	down
TC01002649.hg.1	EPS15	NM_001159969	"Homo sapiens epidermal growth factor receptor pathway substrate 15 (EPS15), transcript variant 2, mRNA."	RefSeq	4.56603	4.87997	-3.21077	-1.2431	0.009596	0.00432	down
TC16000211.hg.1	SYT17	NM_016524	"Homo sapiens synaptotagmin XVII (SYT17), mRNA."	RefSeq	2.13692	2.44987	-4.87578	-1.24224	0.002976	0.001369	down
TC04000213.hg.1	PGM2	NM_018290	"Homo sapiens phosphoglucomutase 2 (PGM2), mRNA."	RefSeq	4.61744	4.93023	-5.47833	-1.24211	0.002059	0	down
TC03002155.hg.1	TFRC	NM_001128148	"Homo sapiens transferrin receptor (p90, CD71) (TFRC), transcript variant 2, mRNA."	RefSeq	4.33854	4.65126	-2.5314	-1.24204	0.018355	0.011282	down
TC10001410.hg.1	PPP3CB	NM_001142353	"Homo sapiens protein phosphatase 3, catalytic subunit, beta isozyme (PPP3CB), transcript variant 1, mRNA."	RefSeq	3.18713	3.4992	-2.75717	-1.24149	0.014656	0.011282	down
TC12000761.hg.1	TMPO	NM_001032283	"Homo sapiens thymopoietin (TMPO), transcript variant 2, mRNA."	RefSeq	5.96971	6.28146	-3.11425	-1.24121	0.010391	0.007304	down
TC03003320.hg.1	NFKBIZ	NM_001005474	"Homo sapiens nuclear factor of kappa light polypeptide gene enhancer in B-cells inhibitor, zeta (NFKBIZ), transcript variant 2, mRNA."	RefSeq	2.03149	2.34298	-4.94552	-1.24099	0.002823	0.001369	down
TC02001086.hg.1	SSFA2	NM_001130445	"Homo sapiens sperm specific antigen 2 (SSFA2), transcript variant 1, mRNA."	RefSeq	5.06098	5.37238	-3.40318	-1.24091	0.008285	0.00432	down
TC11002316.hg.1	CADM1	NM_001098517	"Homo sapiens cell adhesion molecule 1 (CADM1), transcript variant 2, mRNA."	RefSeq	3.3366	3.64732	-3.60211	-1.24032	0.007081	0.002462	down
TC04001086.hg.1	DHX15	NM_001358	"Homo sapiens DEAH (Asp-Glu-Ala-His) box polypeptide 15 (DHX15), mRNA."	RefSeq	5.33747	5.64791	-3.42827	-1.24009	0.008094	0.00432	down
TC02000628.hg.1	SLC9A2	NM_003048	"Homo sapiens solute carrier family 9, subfamily A (NHE2, cation proton antiporter 2), member 2 (SLC9A2), mRNA."	RefSeq	1.70175	2.01216	-4.52829	-1.24006	0.003727	0.001369	down
TC18000149.hg.1	MOCOS	NM_017947	"Homo sapiens molybdenum cofactor sulfurase (MOCOS), mRNA."	RefSeq	4.9031	5.21338	-2.77622	-1.23995	0.014427	0.011282	down
TC06000685.hg.1	PRIM2	NM_000947	"Homo sapiens primase, DNA, polypeptide 2 (58kDa) (PRIM2), mRNA."	RefSeq	2.62315	2.93296	-3.95257	-1.23954	0.005401	0.001624	down
TC01002137.hg.1	CEP104	NM_014704	"Homo sapiens centrosomal protein 104kDa (CEP104), mRNA."	RefSeq	3.50682	3.81631	-4.58784	-1.23927	0.003574	0.001369	down
TC02001089.hg.1	DNAJC10	NM_018981	"Homo sapiens DnaJ (Hsp40) homolog, subfamily C, member 10 (DNAJC10), transcript variant 1, mRNA."	RefSeq	4.22152	4.53044	-2.79893	-1.23878	0.014115	0.011282	down
TC17001613.hg.1	ARL17A	NM_001113738	"Homo sapiens ADP-ribosylation factor-like 17A (ARL17A), transcript variant 1, mRNA."	RefSeq	3.72361	4.03235	-4.75821	-1.23863	0.00318	0.001369	down
TC6_mcf_hap5000022.hg.1	TRIM15	NM_033229	"Homo sapiens tripartite motif containing 15 (TRIM15), mRNA."	RefSeq	2.71203	3.02076	-2.79536	-1.23861	0.014163	0.011282	down
TC6_ssto_hap7000026.hg.1	TRIM15	NM_033229	"Homo sapiens tripartite motif containing 15 (TRIM15), mRNA."	RefSeq	2.71203	3.02076	-2.79536	-1.23861	0.014163	0.011282	down
TC07001579.hg.1	ABCB1	NM_000927	"Homo sapiens ATP-binding cassette, sub-family B (MDR/TAP), member 1 (ABCB1), mRNA."	RefSeq	2.69875	3.00707	-6.60766	-1.23827	0.001104	0	down
TC05001974.hg.1	GEMIN5	NM_001252156	"Homo sapiens gem (nuclear organelle) associated protein 5 (GEMIN5), transcript variant 2, mRNA."	RefSeq	3.62006	3.92824	-2.87974	-1.23815	0.012982	0.007304	down
TC05001605.hg.1	TTC37	NM_014639	"Homo sapiens tetratricopeptide repeat domain 37 (TTC37), mRNA."	RefSeq	2.89662	3.20444	-2.53481	-1.23784	0.018291	0.011282	down
TC16000977.hg.1	NSMCE1	NM_145080	"Homo sapiens non-SMC element 1 homolog (S. cerevisiae) (NSMCE1), mRNA."	RefSeq	5.35075	5.65841	-2.03269	-1.2377	0.034134	0.026443	down
TC02001757.hg.1	SRSF7	NM_001031684	"Homo sapiens serine/arginine-rich splicing factor 7 (SRSF7), transcript variant 1, mRNA."	RefSeq	4.11964	4.42718	-2.97959	-1.23759	0.011703	0.007304	down
TC05000161.hg.1	SKP2	NM_001243120	"Homo sapiens S-phase kinase-associated protein 2, E3 ubiquitin protein ligase (SKP2), transcript variant 3, mRNA."	RefSeq	5.17496	5.48247	-4.4197	-1.23757	0.004007	0.001369	down
TC13000426.hg.1	TFDP1	NM_007111	"Homo sapiens transcription factor Dp-1 (TFDP1), transcript variant 1, mRNA."	RefSeq	4.91177	5.21913	-5.47544	-1.23744	0.002072	0	down
TC14001155.hg.1	DLGAP5	NM_001146015	"Homo sapiens discs, large (Drosophila) homolog-associated protein 5 (DLGAP5), transcript variant 2, mRNA."	RefSeq	4.98942	5.29635	-4.37606	-1.23707	0.004122	0.001369	down
TC04001127.hg.1	RFC1	NM_001204747	"Homo sapiens replication factor C (activator 1) 1, 145kDa (RFC1), transcript variant 2, mRNA."	RefSeq	4.49416	4.80101	-3.46717	-1.23701	0.007807	0.00432	down
TC11000727.hg.1	CTTN	NM_001184740	"Homo sapiens cortactin (CTTN), transcript variant 3, mRNA."	RefSeq	5.4966	5.80337	-4.17172	-1.23693	0.004733	0.001624	down
TC17000234.hg.1	EPN2	NM_148921	"Homo sapiens epsin 2 (EPN2), transcript variant 1, mRNA."	RefSeq	4.256	4.56275	-6.85047	-1.23691	0.001003	0	down
TC04000152.hg.1	MED28	NM_025205	"Homo sapiens mediator complex subunit 28 (MED28), mRNA."	RefSeq	2.71328	3.01952	-3.21645	-1.23649	0.009551	0.00432	down
TC13000878.hg.1	ANKRD10	NM_017664	"Homo sapiens ankyrin repeat domain 10 (ANKRD10), mRNA."	RefSeq	4.39508	4.70111	-4.81532	-1.23631	0.003046	0.001369	down
TC05000202.hg.1	NNT	NM_012343	"Homo sapiens nicotinamide nucleotide transhydrogenase (NNT), nuclear gene encoding mitochondrial protein, transcript variant 1, mRNA."	RefSeq	4.58336	4.88917	-4.90069	-1.23611	0.002906	0.001369	down
TC15001825.hg.1	MFGE8	NM_001114614	"Homo sapiens milk fat globule-EGF factor 8 protein (MFGE8), transcript variant 2, mRNA."	RefSeq	4.26716	4.57272	-1.76255	-1.2359	0.051378	0.042387	down
TC6_apd_hap1000122.hg.1	PSMB9	NM_002800	"Homo sapiens proteasome (prosome, macropain) subunit, beta type, 9 (PSMB9), mRNA."	RefSeq	2.0411	2.34649	-3.65078	-1.23575	0.006808	0.002462	down
TC17001353.hg.1	MYO1D	NM_015194	"Homo sapiens myosin ID (MYO1D), mRNA."	RefSeq	6.31644	6.62173	-2.54602	-1.23567	0.018049	0.011282	down
TC14000916.hg.1	SUPT16H	NM_007192	"Homo sapiens suppressor of Ty 16 homolog (S. cerevisiae) (SUPT16H), mRNA."	RefSeq	6.68608	6.99115	-2.68568	-1.23548	0.015484	0.011282	down
TC15000321.hg.1	HAUS2	NM_001130447	"Homo sapiens HAUS augmin-like complex, subunit 2 (HAUS2), transcript variant 2, mRNA."	RefSeq	3.16809	3.47276	-2.89237	-1.23514	0.012817	0.007304	down
TC08001686.hg.1	PTK2	NM_001199649	"Homo sapiens protein tyrosine kinase 2 (PTK2), transcript variant 3, mRNA."	RefSeq	3.48077	3.78512	-4.24671	-1.23486	0.00451	0.001624	down
TC12000495.hg.1	DGKA	NM_001345	"Homo sapiens diacylglycerol kinase, alpha 80kDa (DGKA), transcript variant 3, mRNA."	RefSeq	3.46546	3.76945	-2.55187	-1.23455	0.017966	0.011282	down
TC20000088.hg.1	BTBD3	NM_014962	"Homo sapiens BTB (POZ) domain containing 3 (BTBD3), transcript variant 1, mRNA."	RefSeq	1.9955	2.29924	-5.09452	-1.23434	0.002638	0.001369	down
TC01002864.hg.1	TGFBR3	NM_001195683	"Homo sapiens transforming growth factor, beta receptor III (TGFBR3), transcript variant 2, mRNA."	RefSeq	4.39609	4.69973	-4.32334	-1.23425	0.004262	0.001369	down
TC12000298.hg.1	DNM1L	NM_005690	"Homo sapiens dynamin 1-like (DNM1L), transcript variant 3, mRNA."	RefSeq	4.4536	4.75723	-2.20147	-1.23424	0.027037	0.026443	down
TC01006333.hg.1	EFNA3	NM_004952	"Homo sapiens ephrin-A3 (EFNA3), mRNA."	RefSeq	3.28832	3.59098	-1.65183	-1.23342	0.061162	0.064129	down
TC03001146.hg.1	RAD18	NM_020165	"Homo sapiens RAD18 homolog (S. cerevisiae) (RAD18), mRNA."	RefSeq	3.05926	3.36186	-3.93991	-1.23336	0.005439	0.001624	down
TC01002669.hg.1	LRP8	NM_001018054	"Homo sapiens low density lipoprotein receptor-related protein 8, apolipoprotein e receptor (LRP8), transcript variant 4, mRNA."	RefSeq	3.56603	3.86859	-3.64085	-1.23332	0.006852	0.002462	down
TC04000709.hg.1	ABCE1	NM_001040876	"Homo sapiens ATP-binding cassette, sub-family E (OABP), member 1 (ABCE1), transcript variant 2, mRNA."	RefSeq	5.05822	5.36067	-3.01804	-1.23323	0.011302	0.007304	down
TC03003337.hg.1	TBC1D5	NM_001134380	"Homo sapiens TBC1 domain family, member 5 (TBC1D5), transcript variant 3, mRNA."	RefSeq	2.35735	2.65972	-4.32882	-1.23317	0.004249	0.001369	down
TC20000752.hg.1	DEFB124	NM_001037500	"Homo sapiens defensin, beta 124 (DEFB124), mRNA."	RefSeq	1.63316	1.93529	-1.92783	-1.23296	0.039755	0.042387	down
TC15000850.hg.1	TICRR	NM_152259	"Homo sapiens TOPBP1-interacting checkpoint and replication regulator (TICRR), mRNA."	RefSeq	3.587	3.88905	-2.83588	-1.23289	0.013536	0.007304	down
TC6_cox_hap2000259.hg.1	PSMB9	NM_002800	"Homo sapiens proteasome (prosome, macropain) subunit, beta type, 9 (PSMB9), mRNA."	RefSeq	2.29773	2.5992	-3.67242	-1.23241	0.006674	0.002462	down
TC02000057.hg.1	RRM2	NM_001034	"Homo sapiens ribonucleotide reductase M2 (RRM2), transcript variant 2, mRNA."	RefSeq	5.91491	6.21616	-6.56471	-1.23222	0.00113	0	down
TC09001683.hg.1	ABO	NM_020469	"Homo sapiens ABO blood group (transferase A, alpha 1-3-N-acetylgalactosaminyltransferase; transferase B, alpha 1-3-galactosyltransferase) (ABO), mRNA."	RefSeq	3.37495	3.67559	-2.36593	-1.23169	0.021824	0.017021	down
TC11000175.hg.1	SWAP70	NM_015055	"Homo sapiens SWAP switching B-cell complex 70kDa subunit (SWAP70), mRNA."	RefSeq	4.18998	4.49012	-3.20466	-1.23127	0.009666	0.00432	down
TC01002196.hg.1	EXOSC10	NM_001001998	"Homo sapiens exosome component 10 (EXOSC10), transcript variant 1, mRNA."	RefSeq	4.87022	5.17027	-4.72615	-1.23119	0.003205	0.001369	down
TC07001452.hg.1	ERV3-1	NM_001007253	"Homo sapiens endogenous retrovirus group 3, member 1 (ERV3-1), mRNA."	RefSeq	1.81259	2.11232	-2.83112	-1.23091	0.0136	0.007304	down
TC05001649.hg.1	NUDT12	NM_031438	"Homo sapiens nudix (nucleoside diphosphate linked moiety X)-type motif 12 (NUDT12), mRNA."	RefSeq	1.87425	2.1738	-4.10462	-1.23077	0.004879	0.001624	down
TC03001778.hg.1	PIK3R4	NM_014602	"Homo sapiens phosphoinositide-3-kinase, regulatory subunit 4 (PIK3R4), mRNA."	RefSeq	2.80758	3.10709	-2.23964	-1.23073	0.025586	0.017021	down
TC17000654.hg.1	ITGA3	NM_002204	"Homo sapiens integrin, alpha 3 (antigen CD49C, alpha 3 subunit of VLA-3 receptor) (ITGA3), transcript variant a, mRNA."	RefSeq	6.19424	6.49353	-1.6867	-1.23055	0.057782	0.064129	down
TC09000492.hg.1	NCBP1	NM_002486	"Homo sapiens nuclear cap binding protein subunit 1, 80kDa (NCBP1), mRNA."	RefSeq	4.92436	5.22346	-2.4823	-1.23037	0.019348	0.017021	down
TC09001420.hg.1	MRPL50	NM_019051	"Homo sapiens mitochondrial ribosomal protein L50 (MRPL50), nuclear gene encoding mitochondrial protein, mRNA."	RefSeq	2.11447	2.41347	-1.75789	-1.23029	0.051722	0.042387	down
TC08001051.hg.1	TNFRSF10D	NM_003840	"Homo sapiens tumor necrosis factor receptor superfamily, member 10d, decoy with truncated death domain (TNFRSF10D), mRNA."	RefSeq	4.46038	4.759	-2.13664	-1.22997	0.029449	0.026443	down
TC10001545.hg.1	NOC3L	NM_022451	"Homo sapiens nucleolar complex associated 3 homolog (S. cerevisiae) (NOC3L), mRNA."	RefSeq	3.02444	3.32257	-2.26146	-1.22955	0.02493	0.017021	down
TC01001956.hg.1	MTR	NM_000254	"Homo sapiens 5-methyltetrahydrofolate-homocysteine methyltransferase (MTR), mRNA."	RefSeq	4.02138	4.31847	-2.38005	-1.22866	0.021493	0.017021	down
TC12000843.hg.1	UNG	NM_003362	"Homo sapiens uracil-DNA glycosylase (UNG), nuclear gene encoding mitochondrial protein, transcript variant 1, mRNA."	RefSeq	3.94398	4.24089	-2.94688	-1.22852	0.012091	0.007304	down
TC19000388.hg.1	ZNF714	NM_182515	"Homo sapiens zinc finger protein 714 (ZNF714), mRNA."	RefSeq	2.49164	2.7883	-3.73232	-1.2283	0.006349	0.002462	down
TC0X000423.hg.1	COX7B	NM_001866	"Homo sapiens cytochrome c oxidase subunit VIIb (COX7B), nuclear gene encoding mitochondrial protein, mRNA."	RefSeq	3.53191	3.82813	-1.97866	-1.22793	0.036916	0.026443	down
TC17001301.hg.1	ALDOC	NM_005165	"Homo sapiens aldolase C, fructose-bisphosphate (ALDOC), mRNA."	RefSeq	1.64565	1.9418	-4.43484	-1.22787	0.003975	0.001369	down
TC17002886.hg.1	TMEM256	NM_152766	"Homo sapiens transmembrane protein 256 (TMEM256), mRNA."	RefSeq	5.24297	5.53876	-2.38884	-1.22756	0.021308	0.017021	down
TC04000645.hg.1	PLK4	NM_001190799	"Homo sapiens polo-like kinase 4 (PLK4), transcript variant 2, mRNA."	RefSeq	2.59307	2.88883	-2.9415	-1.22753	0.012136	0.007304	down
TC01001591.hg.1	C1orf21	NM_030806	"Homo sapiens chromosome 1 open reading frame 21 (C1orf21), mRNA."	RefSeq	1.59433	1.89006	-5.16232	-1.22751	0.002518	0	down
TC09001468.hg.1	PTPN3	NM_002829	"Homo sapiens protein tyrosine phosphatase, non-receptor type 3 (PTPN3), transcript variant 1, mRNA."	RefSeq	4.40915	4.70453	-3.60218	-1.2272	0.007075	0.002462	down
TC02000452.hg.1	MGC10955	ENST00000401851	cdna:known chromosome:GRCh37:2:74361599:74362521:1 gene:ENSG00000217702 gene_biotype:protein_coding transcript_biotype:protein_coding	ENSEMBL	1.58496	1.88026	-1.68411	-1.22713	0.058039	0.064129	down
TC20000083.hg.1	SLX4IP	NM_001009608	"Homo sapiens SLX4 interacting protein (SLX4IP), mRNA."	RefSeq	2.63071	2.92589	-2.05885	-1.22703	0.032817	0.026443	down
TC08000293.hg.1	TACC1	NM_006283	"Homo sapiens transforming, acidic coiled-coil containing protein 1 (TACC1), transcript variant 1, mRNA."	RefSeq	3.86132	4.15649	-5.26253	-1.22703	0.002403	0	down
TC06001273.hg.1	NEDD9	NM_006403	"Homo sapiens neural precursor cell expressed, developmentally down-regulated 9 (NEDD9), transcript variant 1, mRNA."	RefSeq	1.58496	1.88007	-4.09905	-1.22698	0.004905	0.001624	down
TC11000205.hg.1	RASSF10	NM_001080521	"Homo sapiens Ras association (RalGDS/AF-6) domain family (N-terminal) member 10 (RASSF10), mRNA."	RefSeq	2.7391	3.03399	-1.91887	-1.22679	0.040296	0.042387	down
TC11000970.hg.1	AASDHPPT	NM_015423	"Homo sapiens aminoadipate-semialdehyde dehydrogenase-phosphopantetheinyl transferase (AASDHPPT), mRNA."	RefSeq	4.02335	4.31821	-1.73228	-1.22676	0.053854	0.042387	down
TC12001913.hg.1	APPL2	NM_001251904	"Homo sapiens adaptor protein, phosphotyrosine interaction, PH domain and leucine zipper containing 2 (APPL2), transcript variant 2, mRNA."	RefSeq	4.12003	4.41477	-4.04553	-1.22666	0.005102	0.001624	down
TC20000384.hg.1	CSE1L	NM_001256135	"Homo sapiens CSE1 chromosome segregation 1-like (yeast) (CSE1L), transcript variant 2, mRNA."	RefSeq	6.82149	7.11621	-2.67649	-1.22664	0.015687	0.011282	down
TC07003361.hg.1	CYP51A1	NM_000786	"Homo sapiens cytochrome P450, family 51, subfamily A, polypeptide 1 (CYP51A1), transcript variant 1, mRNA."	RefSeq	5.52984	5.82441	-4.52445	-1.22652	0.00374	0.001369	down
TC08001173.hg.1	KAT6A	NM_006766	"Homo sapiens K(lysine) acetyltransferase 6A (KAT6A), transcript variant 3, mRNA."	RefSeq	4.40862	4.70319	-2.81085	-1.22651	0.013918	0.007304	down
TC11001517.hg.1	KIF18A	NM_031217	"Homo sapiens kinesin family member 18A (KIF18A), mRNA."	RefSeq	3.66553	3.95996	-2.50607	-1.2264	0.018819	0.011282	down
TC04001157.hg.1	GNPDA2	NM_138335	"Homo sapiens glucosamine-6-phosphate deaminase 2 (GNPDA2), transcript variant 1, mRNA."	RefSeq	1.79435	2.08869	-3.95896	-1.22633	0.005376	0.001624	down
TC18000103.hg.1	LAMA3	NM_000227	"Homo sapiens laminin, alpha 3 (LAMA3), transcript variant 2, mRNA."	RefSeq	3.77651	4.0707	-3.02287	-1.2262	0.011225	0.007304	down
TC11000916.hg.1	PANX1	NM_015368	"Homo sapiens pannexin 1 (PANX1), mRNA."	RefSeq	4.47911	4.7732	-1.94239	-1.22612	0.038768	0.042387	down
TC18000070.hg.1	CEP192	NM_032142	"Homo sapiens centrosomal protein 192kDa (CEP192), mRNA."	RefSeq	3.2371	3.53077	-3.62146	-1.22575	0.006986	0.002462	down
TC6_mcf_hap5000202.hg.1	PSMB9	NM_002800	"Homo sapiens proteasome (prosome, macropain) subunit, beta type, 9 (PSMB9), mRNA."	RefSeq	2.02278	2.31612	-3.56969	-1.22548	0.007225	0.002462	down
TC6_ssto_hap7000193.hg.1	PSMB9	NM_002800	"Homo sapiens proteasome (prosome, macropain) subunit, beta type, 9 (PSMB9), mRNA."	RefSeq	2.02278	2.31612	-3.56969	-1.22548	0.007225	0.002462	down
TC09001194.hg.1	PTAR1	NM_001099666	"Homo sapiens protein prenyltransferase alpha subunit repeat containing 1 (PTAR1), mRNA."	RefSeq	3.60709	3.89914	-2.30356	-1.22438	0.023549	0.017021	down
TC12001792.hg.1	KITLG	NM_000899	"Homo sapiens KIT ligand (KITLG), transcript variant b, mRNA."	RefSeq	2.31982	2.61154	-2.86651	-1.2241	0.013173	0.007304	down
TC10000748.hg.1	PPRC1	NM_015062	"Homo sapiens peroxisome proliferator-activated receptor gamma, coactivator-related 1 (PPRC1), mRNA."	RefSeq	3.14375	3.43547	-4.03627	-1.22409	0.005134	0.001624	down
TC10000581.hg.1	FAM213A	NM_001243778	"Homo sapiens family with sequence similarity 213, member A (FAM213A), transcript variant 2, mRNA."	RefSeq	3.07386	3.36552	-3.64838	-1.22405	0.006814	0.002462	down
TC06001732.hg.1	TRERF1	NM_033502	"Homo sapiens transcriptional regulating factor 1 (TRERF1), mRNA."	RefSeq	2.39643	2.68786	-3.04765	-1.22386	0.011003	0.007304	down
TC02002214.hg.1	RGPD8	NM_001164463	"Homo sapiens RANBP2-like and GRIP domain containing 8 (RGPD8), mRNA."	RefSeq	5.79605	6.08743	-2.22468	-1.22381	0.02605	0.017021	down
TC14000886.hg.1	OSGEP	NM_017807	"Homo sapiens O-sialoglycoprotein endopeptidase (OSGEP), mRNA."	RefSeq	2.44392	2.73524	-5.60311	-1.22376	0.001951	0	down
TC01003702.hg.1	UBE2T	NM_014176	"Homo sapiens ubiquitin-conjugating enzyme E2T (putative) (UBE2T), mRNA."	RefSeq	3.64249	3.9337	-2.27416	-1.22366	0.024504	0.017021	down
TC11002346.hg.1	MPZL2	NM_005797	"Homo sapiens myelin protein zero-like 2 (MPZL2), transcript variant 1, mRNA."	RefSeq	5.02709	5.3182	-3.36322	-1.22358	0.008444	0.00432	down
TC19000274.hg.1	CYP4F3	NM_000896	"Homo sapiens cytochrome P450, family 4, subfamily F, polypeptide 3 (CYP4F3), transcript variant 1, mRNA."	RefSeq	2.39259	2.68366	-2.80258	-1.22355	0.014071	0.011282	down
TC12001830.hg.1		ENST00000549961	cdna:putative chromosome:GRCh37:12:95770984:95774672:-1 gene:ENSG00000258247 gene_biotype:protein_coding transcript_biotype:protein_coding	ENSEMBL	3.95214	4.24307	-3.1948	-1.22343	0.009768	0.00432	down
TC13000738.hg.1	TBC1D4	NM_014832	"Homo sapiens TBC1 domain family, member 4 (TBC1D4), mRNA."	RefSeq	2.82615	3.11664	-4.07581	-1.22305	0.005	0.001624	down
TC17001973.hg.1	FASN	NM_004104	"Homo sapiens fatty acid synthase (FASN), mRNA."	RefSeq	4.46891	4.75927	-4.89391	-1.22295	0.002925	0.001369	down
TC09000941.hg.1	MLLT3	NM_004529	"Homo sapiens myeloid/lymphoid or mixed-lineage leukemia (trithorax homolog, Drosophila); translocated to, 3 (MLLT3), mRNA."	RefSeq	5.16551	5.45578	-3.31102	-1.22286	0.008794	0.00432	down
TC04000625.hg.1	EXOSC9	NM_001034194	"Homo sapiens exosome component 9 (EXOSC9), transcript variant 1, mRNA."	RefSeq	2.5085	2.79841	-3.88353	-1.22256	0.005656	0.002462	down
TC05001731.hg.1	ZNF608	NM_020747	"Homo sapiens zinc finger protein 608 (ZNF608), mRNA."	RefSeq	3.26371	3.55339	-3.72926	-1.22237	0.006388	0.002462	down
TC01000198.hg.1	SPEN	NM_015001	"Homo sapiens spen homolog, transcriptional regulator (Drosophila) (SPEN), mRNA."	RefSeq	4.37329	4.66295	-2.67531	-1.22236	0.015713	0.011282	down
TC20000603.hg.1	FERMT1	NM_017671	"Homo sapiens fermitin family member 1 (FERMT1), mRNA."	RefSeq	3.83335	4.12248	-2.98118	-1.2219	0.011684	0.007304	down
TC04001685.hg.1	C4orf46	NM_001008393	"Homo sapiens chromosome 4 open reading frame 46 (C4orf46), transcript variant 1, mRNA."	RefSeq	3.98817	4.27623	-3.07626	-1.221	0.01071	0.007304	down
TC03002133.hg.1	ATP13A3	NM_024524	"Homo sapiens ATPase type 13A3 (ATP13A3), mRNA."	RefSeq	4.92777	5.21582	-2.46553	-1.22099	0.019742	0.017021	down
TC19001480.hg.1	ZNF585B	NM_152279	"Homo sapiens zinc finger protein 585B (ZNF585B), mRNA."	RefSeq	2.03322	2.32112	-2.71182	-1.22086	0.015159	0.011282	down
TC06000868.hg.1	FOXO3	NM_001455	"Homo sapiens forkhead box O3 (FOXO3), transcript variant 1, mRNA."	RefSeq	3.822	4.10975	-2.64981	-1.22073	0.01612	0.011282	down
TC17_ctg5_hap1000024.hg.1	ARL17A	NM_001113738	"Homo sapiens ADP-ribosylation factor-like 17A (ARL17A), transcript variant 1, mRNA."	RefSeq	2.85096	3.13837	-3.23814	-1.22045	0.009367	0.00432	down
TC15001858.hg.1	PRC1	NM_003981	"Homo sapiens protein regulator of cytokinesis 1 (PRC1), transcript variant 1, mRNA."	RefSeq	5.3232	5.61043	-2.84342	-1.2203	0.013472	0.007304	down
TC09000573.hg.1	PRPF4	NM_001244926	"Homo sapiens PRP4 pre-mRNA processing factor 4 homolog (yeast) (PRPF4), transcript variant 2, mRNA."	RefSeq	4.79375	5.08089	-2.34561	-1.22022	0.02232	0.017021	down
TC18000458.hg.1	SLC39A6	NM_001099406	"Homo sapiens solute carrier family 39 (zinc transporter), member 6 (SLC39A6), transcript variant 2, mRNA."	RefSeq	6.23458	6.52167	-4.37842	-1.22018	0.004115	0.001369	down
TC05000604.hg.1	LMNB1	NM_001198557	"Homo sapiens lamin B1 (LMNB1), transcript variant 2, mRNA."	RefSeq	5.21793	5.50484	-2.8926	-1.22002	0.01281	0.007304	down
TC12000437.hg.1	SP1	NM_001251825	"Homo sapiens Sp1 transcription factor (SP1), transcript variant 3, mRNA."	RefSeq	5.32195	5.60881	-3.30224	-1.21998	0.008877	0.00432	down
TC13000472.hg.1	ZDHHC20	NM_153251	"Homo sapiens zinc finger, DHHC-type containing 20 (ZDHHC20), mRNA."	RefSeq	5.62355	5.91021	-2.64325	-1.21981	0.016165	0.011282	down
TC16000342.hg.1	CORO1A	NM_001193333	"Homo sapiens coronin, actin binding protein, 1A (CORO1A), transcript variant 1, mRNA."	RefSeq	2.93647	3.22308	-4.46172	-1.21977	0.003924	0.001369	down
TC03000632.hg.1	DTX3L	NM_138287	"Homo sapiens deltex 3-like (Drosophila) (DTX3L), mRNA."	RefSeq	3.8591	4.14541	-2.82523	-1.21951	0.013676	0.007304	down
TC11002151.hg.1	PRCP	NM_005040	"Homo sapiens prolylcarboxypeptidase (angiotensinase C) (PRCP), transcript variant 1, mRNA."	RefSeq	5.30293	5.58923	-2.8409	-1.21951	0.013498	0.007304	down
TC11000311.hg.1	QSER1	NM_001076786	"Homo sapiens glutamine and serine rich 1 (QSER1), mRNA."	RefSeq	3.69722	3.98262	-2.32369	-1.21875	0.022919	0.017021	down
TC14000219.hg.1	SRP54	NM_001146282	"Homo sapiens signal recognition particle 54kDa (SRP54), transcript variant 2, mRNA."	RefSeq	4.51104	4.796	-3.17246	-1.21837	0.00994	0.00432	down
TC05000304.hg.1	OCLN	NM_002538	"Homo sapiens occludin (OCLN), transcript variant 1, mRNA."	RefSeq	5.74365	6.02851	-2.9981	-1.2183	0.011531	0.007304	down
TC20001762.hg.1	RBM12	NM_001198838	"Homo sapiens RNA binding motif protein 12 (RBM12), transcript variant 3, mRNA."	RefSeq	5.18525	5.46988	-5.43265	-1.2181	0.002129	0	down
TC07003390.hg.1	ZNRF2	NM_147128	"Homo sapiens zinc and ring finger 2 (ZNRF2), mRNA."	RefSeq	2.0921	2.3765	-2.86646	-1.2179	0.013186	0.007304	down
TC17000718.hg.1	PRR11	NM_018304	"Homo sapiens proline rich 11 (PRR11), mRNA."	RefSeq	5.63472	5.91902	-2.32149	-1.21782	0.022976	0.017021	down
TC10001136.hg.1	MPP7	NM_173496	"Homo sapiens membrane protein, palmitoylated 7 (MAGUK p55 subfamily member 7) (MPP7), mRNA."	RefSeq	2.42669	2.71093	-3.5283	-1.21777	0.007451	0.002462	down
TC02000105.hg.1	GEN1	NM_001130009	"Homo sapiens Gen endonuclease homolog 1 (Drosophila) (GEN1), transcript variant 2, mRNA."	RefSeq	3.21236	3.49656	-1.88158	-1.21774	0.042479	0.042387	down
TC01000999.hg.1	MAGI3	NM_001142782	"Homo sapiens membrane associated guanylate kinase, WW and PDZ domain containing 3 (MAGI3), transcript variant 1, mRNA."	RefSeq	3.27193	3.55607	-4.81841	-1.21769	0.003033	0.001369	down
TC12000765.hg.1	APAF1	NM_001160	"Homo sapiens apoptotic peptidase activating factor 1 (APAF1), transcript variant 2, mRNA."	RefSeq	3.15182	3.43594	-3.00417	-1.21766	0.011442	0.007304	down
TC19001589.hg.1	XRCC1	ENST00000458471	[retired] cdna:known chromosome:GRCh37:19:44047464:44079730:-1 gene:ENSG00000073050 gene_biotype:protein_coding transcript_biotype:protein_coding	ENSEMBL	5.52299	5.80628	-2.33853	-1.21696	0.022518	0.017021	down
TC12001439.hg.1	VDR	NM_000376	"Homo sapiens vitamin D (1,25- dihydroxyvitamin D3) receptor (VDR), transcript variant 1, mRNA."	RefSeq	3.70197	3.98522	-5.32247	-1.21693	0.00225	0	down
TC12001766.hg.1	PPP1R12A	NM_001143885	"Homo sapiens protein phosphatase 1, regulatory subunit 12A (PPP1R12A), transcript variant 2, mRNA."	RefSeq	4.70519	4.98841	-2.08069	-1.21691	0.031741	0.026443	down
TC10002935.hg.1	BMI1	NM_005180	"Homo sapiens BMI1 polycomb ring finger oncogene (BMI1), mRNA."	RefSeq	4.46206	4.74511	-3.75167	-1.21676	0.006235	0.002462	down
TC0X000510.hg.1	FAM199X	NM_207318	"Homo sapiens family with sequence similarity 199, X-linked (FAM199X), mRNA."	RefSeq	4.48918	4.7722	-2.67406	-1.21674	0.015732	0.011282	down
TC08000093.hg.1	FDFT1	NM_004462	"Homo sapiens farnesyl-diphosphate farnesyltransferase 1 (FDFT1), mRNA."	RefSeq	4.51031	4.79315	-2.6294	-1.21659	0.016426	0.011282	down
TC17001019.hg.1	ANKFY1	NM_016376	"Homo sapiens ankyrin repeat and FYVE domain containing 1 (ANKFY1), transcript variant 1, mRNA."	RefSeq	4.62132	4.90412	-4.1073	-1.21656	0.00486	0.001624	down
TC6_dbb_hap3000226.hg.1	PSMB9	NM_002800	"Homo sapiens proteasome (prosome, macropain) subunit, beta type, 9 (PSMB9), mRNA."	RefSeq	2.2902	2.57269	-3.54262	-1.21629	0.007362	0.002462	down
TC02000672.hg.1	RGPD6	NM_001037866	"Homo sapiens RANBP2-like and GRIP domain containing 6 (RGPD6), transcript variant 2, mRNA."	RefSeq	5.00054	5.28302	-2.25649	-1.21628	0.025051	0.017021	down
TC06000161.hg.1	TRIM38	NM_006355	"Homo sapiens tripartite motif containing 38 (TRIM38), mRNA."	RefSeq	3.89614	4.17833	-2.78482	-1.21604	0.014274	0.011282	down
TC02000662.hg.1	SULT1C3	NM_001008743	"Homo sapiens sulfotransferase family, cytosolic, 1C, member 3 (SULT1C3), mRNA."	RefSeq	1.94978	2.23162	-2.05667	-1.21575	0.032861	0.026443	down
TC01000998.hg.1	LRIG2	NM_014813	"Homo sapiens leucine-rich repeats and immunoglobulin-like domains 2 (LRIG2), mRNA."	RefSeq	2.78765	3.0692	-2.26796	-1.2155	0.024669	0.017021	down
TC18000223.hg.1	ZCCHC2	NM_017742	"Homo sapiens zinc finger, CCHC domain containing 2 (ZCCHC2), mRNA."	RefSeq	2.55543	2.83675	-4.08518	-1.21531	0.004955	0.001624	down
TC19001393.hg.1	CEP89	NM_032816	"Homo sapiens centrosomal protein 89kDa (CEP89), mRNA."	RefSeq	2.9393	3.22002	-2.4578	-1.2148	0.019844	0.017021	down
TC09000207.hg.1	MELK	NM_014791	"Homo sapiens maternal embryonic leucine zipper kinase (MELK), transcript variant 1, mRNA."	RefSeq	5.51106	5.79149	-2.42604	-1.21456	0.02043	0.017021	down
TC12000595.hg.1	CAND1	NM_018448	"Homo sapiens cullin-associated and neddylation-dissociated 1 (CAND1), mRNA."	RefSeq	5.29884	5.57887	-2.3349	-1.21422	0.022562	0.017021	down
TC6_dbb_hap3000069.hg.1	HSPA1A	NM_005345	"Homo sapiens heat shock 70kDa protein 1A (HSPA1A), mRNA."	RefSeq	4.26147	4.54137	-2.48808	-1.21411	0.019233	0.017021	down
TC21000299.hg.1	BTG3	NM_001130914	"Homo sapiens BTG family, member 3 (BTG3), transcript variant 1, mRNA."	RefSeq	3.25638	3.53609	-3.89122	-1.21395	0.005605	0.001624	down
TC06001970.hg.1	ASCC3	NM_006828	"Homo sapiens activating signal cointegrator 1 complex subunit 3 (ASCC3), transcript variant 1, mRNA."	RefSeq	2.87247	3.15211	-1.61959	-1.21389	0.064663	0.064129	down
TC14000983.hg.1	STXBP6	NM_014178	"Homo sapiens syntaxin binding protein 6 (amisyn) (STXBP6), mRNA."	RefSeq	2.27869	2.55831	-6.8623	-1.21388	0.00099	0	down
TC04002924.hg.1	SLC39A8	NM_001135146	"Homo sapiens solute carrier family 39 (zinc transporter), member 8 (SLC39A8), transcript variant 2, mRNA."	RefSeq	1.62349	1.90305	-4.00832	-1.21383	0.005185	0.001624	down
TC13000330.hg.1	GPR180	NM_180989	"Homo sapiens G protein-coupled receptor 180 (GPR180), mRNA."	RefSeq	5.23137	5.51074	-3.24497	-1.21366	0.00929	0.00432	down
TC08001551.hg.1	SAMD12	NM_001101676	"Homo sapiens sterile alpha motif domain containing 12 (SAMD12), transcript variant 1, mRNA."	RefSeq	2.17574	2.45499	-2.69467	-1.21357	0.015363	0.011282	down
TC07003360.hg.1	GATSL2	NM_001145064	"Homo sapiens GATS protein-like 2 (GATSL2), mRNA."	RefSeq	4.18863	4.46728	-2.05625	-1.21306	0.03288	0.026443	down
TC06001401.hg.1	ZNF184	NM_007149	"Homo sapiens zinc finger protein 184 (ZNF184), mRNA."	RefSeq	1.87334	2.15164	-3.19289	-1.21276	0.009819	0.00432	down
TC11000856.hg.1	PCF11	NM_015885	"Homo sapiens PCF11, cleavage and polyadenylation factor subunit, homolog (S. cerevisiae) (PCF11), mRNA."	RefSeq	2.88428	3.16212	-2.34456	-1.21237	0.022339	0.017021	down
TC6_mann_hap4000190.hg.1	PSMB9	NM_002800	"Homo sapiens proteasome (prosome, macropain) subunit, beta type, 9 (PSMB9), mRNA."	RefSeq	2.17352	2.45123	-3.4379	-1.21227	0.008008	0.00432	down
TC6_qbl_hap6000215.hg.1	PSMB9	NM_002800	"Homo sapiens proteasome (prosome, macropain) subunit, beta type, 9 (PSMB9), mRNA."	RefSeq	2.17352	2.45123	-3.4379	-1.21227	0.008008	0.00432	down
TC04000611.hg.1	USP53	NM_019050	"Homo sapiens ubiquitin specific peptidase 53 (USP53), mRNA."	RefSeq	4.67372	4.95127	-2.33098	-1.21214	0.022702	0.017021	down
TC11000956.hg.1	BIRC3	NM_001165	"Homo sapiens baculoviral IAP repeat containing 3 (BIRC3), transcript variant 1, mRNA."	RefSeq	2.24516	2.52238	-2.9491	-1.21185	0.012053	0.007304	down
TC17001300.hg.1	PIGS	NM_033198	"Homo sapiens phosphatidylinositol glycan anchor biosynthesis, class S (PIGS), mRNA."	RefSeq	3.57572	3.85289	-3.49165	-1.21182	0.007686	0.00432	down
TC04001517.hg.1	BBS7	NM_018190	"Homo sapiens Bardet-Biedl syndrome 7 (BBS7), transcript variant 2, mRNA."	RefSeq	2.80247	3.07943	-2.49538	-1.21164	0.019074	0.017021	down
TC02002647.hg.1	SF3B1	NM_001005526	"Homo sapiens splicing factor 3b, subunit 1, 155kDa (SF3B1), transcript variant 2, mRNA."	RefSeq	5.68742	5.96405	-2.84468	-1.21136	0.013434	0.007304	down
TC06000698.hg.1	PHF3	NM_015153	"Homo sapiens PHD finger protein 3 (PHF3), mRNA."	RefSeq	4.16111	4.43774	-2.14182	-1.21136	0.029303	0.026443	down
TC06000879.hg.1	FIG4	NM_014845	"Homo sapiens FIG4 homolog, SAC1 lipid phosphatase domain containing (S. cerevisiae) (FIG4), mRNA."	RefSeq	3.86877	4.14535	-3.57901	-1.21132	0.007202	0.002462	down
TC11001107.hg.1	SORL1	NM_003105	"Homo sapiens sortilin-related receptor, L(DLR class) A repeats containing (SORL1), mRNA."	RefSeq	5.49316	5.7697	-3.21881	-1.21129	0.009507	0.00432	down
TC01000462.hg.1	AGO4	NM_017629	"Homo sapiens argonaute RISC catalytic component 4 (AGO4), mRNA."	RefSeq	3.05649	3.3329	-2.55655	-1.21117	0.017839	0.011282	down
TC18000268.hg.1	ADNP2	NM_014913	"Homo sapiens ADNP homeobox 2 (ADNP2), mRNA."	RefSeq	5.10428	5.3802	-8.05101	-1.21077	0.000557	0	down
TC05001223.hg.1	DROSHA	NM_001100412	"Homo sapiens drosha, ribonuclease type III (DROSHA), transcript variant 2, mRNA."	RefSeq	3.88056	4.15644	-2.86782	-1.21074	0.013148	0.007304	down
TC05001584.hg.1	CETN3	NM_004365	"Homo sapiens centrin, EF-hand protein, 3 (CETN3), mRNA."	RefSeq	1.67487	1.95059	-1.86725	-1.2106	0.04344	0.042387	down
TC02001022.hg.1	DYNC1I2	NM_001378	"Homo sapiens dynein, cytoplasmic 1, intermediate chain 2 (DYNC1I2), transcript variant 1, mRNA."	RefSeq	3.79776	4.07337	-3.31175	-1.2105	0.008768	0.00432	down
TC15000223.hg.1	ARHGAP11A	NM_014783	"Homo sapiens Rho GTPase activating protein 11A (ARHGAP11A), transcript variant 1, mRNA."	RefSeq	5.62554	5.90065	-2.73204	-1.21009	0.014917	0.011282	down
TC20000289.hg.1	ACTR5	NM_024855	"Homo sapiens ARP5 actin-related protein 5 homolog (yeast) (ACTR5), mRNA."	RefSeq	2.70346	2.97819	-2.36028	-1.20977	0.021957	0.017021	down
TC02000582.hg.1	NCAPH	NM_015341	"Homo sapiens non-SMC condensin I complex, subunit H (NCAPH), mRNA."	RefSeq	4.34777	4.62242	-4.17734	-1.2097	0.004726	0.001624	down
TC02002203.hg.1	RGPD5	NM_005054	"Homo sapiens RANBP2-like and GRIP domain containing 5 (RGPD5), transcript variant 1, mRNA."	RefSeq	5.33053	5.60491	-2.1679	-1.20947	0.028393	0.026443	down
TC01002327.hg.1	USP48	NM_001032730	"Homo sapiens ubiquitin specific peptidase 48 (USP48), transcript variant 2, mRNA."	RefSeq	3.256	3.5301	-3.36784	-1.20924	0.008431	0.00432	down
TC22000116.hg.1	GGTLC2	NM_199127	"Homo sapiens gamma-glutamyltransferase light chain 2 (GGTLC2), transcript variant 1, mRNA."	RefSeq	4.20862	4.48266	-3.5996	-1.20919	0.007101	0.002462	down
TC04001134.hg.1	PDS5A	NM_001100399	"Homo sapiens PDS5, regulator of cohesion maintenance, homolog A (S. cerevisiae) (PDS5A), transcript variant 1, mRNA."	RefSeq	6.18751	6.46085	-1.99009	-1.20861	0.036318	0.026443	down
TC09000877.hg.1		ENST00000366116	cdna:novel chromosome:GRCh37:9:3452305:3469181:-1 gene:ENSG00000203286 gene_biotype:protein_coding transcript_biotype:protein_coding	ENSEMBL	7.2432	7.51648	-1.81814	-1.20856	0.047056	0.042387	down
TC16000455.hg.1	LPCAT2	NM_017839	"Homo sapiens lysophosphatidylcholine acyltransferase 2 (LPCAT2), mRNA."	RefSeq	6.11205	6.38503	-2.34112	-1.2083	0.022441	0.017021	down
TC20000198.hg.1	TPX2	NM_012112	"Homo sapiens TPX2, microtubule-associated, homolog (Xenopus laevis) (TPX2), mRNA."	RefSeq	6.95973	7.23262	-2.77937	-1.20823	0.014376	0.011282	down
TC08000220.hg.1	FZD3	NM_017412	"Homo sapiens frizzled family receptor 3 (FZD3), transcript variant 1, mRNA."	RefSeq	2.6915	2.96434	-2.09432	-1.20818	0.031143	0.026443	down
TC19001146.hg.1	ZNF266	NM_006631	"Homo sapiens zinc finger protein 266 (ZNF266), transcript variant 1, mRNA."	RefSeq	3.02505	3.29787	-2.08809	-1.20817	0.031423	0.026443	down
TC17000531.hg.1	TUBG1	NM_001070	"Homo sapiens tubulin, gamma 1 (TUBG1), mRNA."	RefSeq	6.14821	6.42079	-2.10426	-1.20797	0.030691	0.026443	down
TC12001348.hg.1	ERGIC2	NM_016570	"Homo sapiens ERGIC and golgi 2 (ERGIC2), mRNA."	RefSeq	5.14717	5.4197	-3.52929	-1.20792	0.007444	0.002462	down
TC04001600.hg.1	INPP4B	NM_001101669	"Homo sapiens inositol polyphosphate-4-phosphatase, type II, 105kDa (INPP4B), transcript variant 2, mRNA."	RefSeq	1.74714	2.01952	-4.31068	-1.20779	0.004281	0.001369	down
TC11000820.hg.1	C11orf30	NM_020193	"Homo sapiens chromosome 11 open reading frame 30 (C11orf30), mRNA."	RefSeq	3.69425	3.96652	-3.05294	-1.20771	0.010971	0.007304	down
TC01003588.hg.1	TOR1AIP2	NM_001199260	"Homo sapiens torsin A interacting protein 2 (TOR1AIP2), transcript variant 3, mRNA."	RefSeq	5.81093	6.08289	-1.49185	-1.20745	0.080461	0.064129	down
TC10001361.hg.1	SAR1A	NM_001142648	"Homo sapiens SAR1 homolog A (S. cerevisiae) (SAR1A), transcript variant 1, mRNA."	RefSeq	4.70263	4.97453	-2.64018	-1.20739	0.016222	0.011282	down
TC05001033.hg.1	HNRNPAB	NM_004499	"Homo sapiens heterogeneous nuclear ribonucleoprotein A/B (HNRNPAB), transcript variant 2, mRNA."	RefSeq	6.6754	6.9472	-2.91763	-1.20731	0.012409	0.007304	down
TC22000195.hg.1	EWSR1	NM_001163285	"Homo sapiens Ewing sarcoma breakpoint region 1 (EWSR1), transcript variant 3, mRNA."	RefSeq	4.9229	5.19469	-3.55781	-1.2073	0.007304	0.002462	down
TC6_mcf_hap5000063.hg.1	SAPCD1	NM_001039651	"Homo sapiens suppressor APC domain containing 1 (SAPCD1), mRNA."	RefSeq	3.25168	3.52294	-3.65247	-1.20687	0.006801	0.002462	down
TC16000968.hg.1	ERN2	NM_033266	"Homo sapiens endoplasmic reticulum to nucleus signaling 2 (ERN2), mRNA."	RefSeq	3.74067	4.01174	-3.18355	-1.2067	0.00987	0.00432	down
TC06000800.hg.1	CASP8AP2	NM_001137667	"Homo sapiens caspase 8 associated protein 2 (CASP8AP2), transcript variant 2, mRNA."	RefSeq	2.83965	3.11038	-2.29892	-1.20642	0.02367	0.017021	down
TC6_mann_hap4000197.hg.1	GABBR1	NM_001470	"Homo sapiens gamma-aminobutyric acid (GABA) B receptor, 1 (GABBR1), transcript variant 1, mRNA."	RefSeq	2.58765	2.85817	-6.49735	-1.20624	0.001174	0	down
TC14001472.hg.1	DICER1	NM_177438	"Homo sapiens dicer 1, ribonuclease type III (DICER1), transcript variant 1, mRNA."	RefSeq	3.93926	4.20944	-2.2228	-1.20596	0.026114	0.017021	down
TC05000601.hg.1	GRAMD3	NM_001146321	"Homo sapiens GRAM domain containing 3 (GRAMD3), transcript variant 4, mRNA."	RefSeq	2.38447	2.65429	-5.72409	-1.20566	0.001785	0	down
TC06002157.hg.1	PERP	NM_022121	"Homo sapiens PERP, TP53 apoptosis effector (PERP), mRNA."	RefSeq	9.50169	9.77148	-4.16993	-1.20563	0.004752	0.001624	down
TC01002707.hg.1	MYSM1	NM_001085487	"Homo sapiens Myb-like, SWIRM and MPN domains 1 (MYSM1), mRNA."	RefSeq	2.99387	3.26345	-2.05958	-1.20546	0.032791	0.026443	down
TC06000769.hg.1		ENST00000398400	cdna:novel chromosome:GRCh37:6:83782692:83782854:1 gene:ENSG00000214479 gene_biotype:protein_coding transcript_biotype:protein_coding	ENSEMBL	7.02078	7.29035	-1.66857	-1.20545	0.059564	0.064129	down
TC6_dbb_hap3000068.hg.1	SAPCD1	NM_001039651	"Homo sapiens suppressor APC domain containing 1 (SAPCD1), mRNA."	RefSeq	3.2527	3.52201	-3.73169	-1.20523	0.006356	0.002462	down
TC04000643.hg.1	HSPA4L	NM_014278	"Homo sapiens heat shock 70kDa protein 4-like (HSPA4L), mRNA."	RefSeq	2.43787	2.70707	-3.13213	-1.20514	0.010271	0.007304	down
TC06000633.hg.1	CD2AP	NM_012120	"Homo sapiens CD2-associated protein (CD2AP), mRNA."	RefSeq	5.32656	5.5957	-2.0963	-1.20509	0.03106	0.026443	down
TC01000703.hg.1	INADL	NM_176877	"Homo sapiens InaD-like (Drosophila) (INADL), mRNA."	RefSeq	3.8073	4.07597	-3.70054	-1.20469	0.00656	0.002462	down
TC10000129.hg.1	STAM	NM_003473	"Homo sapiens signal transducing adaptor molecule (SH3 domain and ITAM motif) 1 (STAM), transcript variant 1, mRNA."	RefSeq	5.12524	5.39371	-2.91718	-1.20453	0.012416	0.007304	down
TC6_apd_hap1000125.hg.1	GABBR1	NM_001470	"Homo sapiens gamma-aminobutyric acid (GABA) B receptor, 1 (GABBR1), transcript variant 1, mRNA."	RefSeq	2.56697	2.83543	-6.03738	-1.20452	0.001537	0	down
TC02000353.hg.1	AHSA2	NM_152392	"Homo sapiens AHA1, activator of heat shock 90kDa protein ATPase homolog 2 (yeast) (AHSA2), mRNA."	RefSeq	2.53932	2.80756	-2.75055	-1.20434	0.014733	0.011282	down
TC14001079.hg.1	KLHL28	NM_017658	"Homo sapiens kelch-like family member 28 (KLHL28), mRNA."	RefSeq	2.46292	2.73112	-2.01947	-1.2043	0.034771	0.026443	down
TC18000045.hg.1	TWSG1	NM_020648	"Homo sapiens twisted gastrulation homolog 1 (Drosophila) (TWSG1), mRNA."	RefSeq	6.64794	6.91606	-3.51077	-1.20424	0.00754	0.002462	down
TC03000184.hg.1	VILL	NM_015873	"Homo sapiens villin-like (VILL), mRNA."	RefSeq	2.53791	2.80586	-3.21002	-1.20409	0.009615	0.00432	down
TC04000275.hg.1	NIPAL1	NM_207330	"Homo sapiens NIPA-like domain containing 1 (NIPAL1), mRNA."	RefSeq	2.03036	2.29805	-4.13228	-1.20388	0.004815	0.001624	down
TC19002669.hg.1	ZNF551	NM_138347	"Homo sapiens zinc finger protein 551 (ZNF551), transcript variant 1, mRNA."	RefSeq	2.20454	2.47197	-2.8835	-1.20366	0.01295	0.007304	down
TC6_cox_hap2000248.hg.1	GABBR1	NM_001470	"Homo sapiens gamma-aminobutyric acid (GABA) B receptor, 1 (GABBR1), transcript variant 1, mRNA."	RefSeq	2.60877	2.87617	-6.46028	-1.20364	0.001206	0	down
TC6_dbb_hap3000227.hg.1	GABBR1	NM_001470	"Homo sapiens gamma-aminobutyric acid (GABA) B receptor, 1 (GABBR1), transcript variant 1, mRNA."	RefSeq	2.60877	2.87617	-6.46028	-1.20364	0.001206	0	down
TC6_mcf_hap5000214.hg.1	GABBR1	NM_001470	"Homo sapiens gamma-aminobutyric acid (GABA) B receptor, 1 (GABBR1), transcript variant 1, mRNA."	RefSeq	2.60877	2.87617	-6.46028	-1.20364	0.001206	0	down
TC6_qbl_hap6000226.hg.1	GABBR1	NM_001470	"Homo sapiens gamma-aminobutyric acid (GABA) B receptor, 1 (GABBR1), transcript variant 1, mRNA."	RefSeq	2.57544	2.84284	-6.46026	-1.20364	0.001219	0	down
TC05000602.hg.1	PHAX	NM_032177	"Homo sapiens phosphorylated adaptor for RNA export (PHAX), mRNA."	RefSeq	4.10734	4.37468	-1.87897	-1.20359	0.042728	0.042387	down
TC11000173.hg.1	ZNF143	NM_003442	"Homo sapiens zinc finger protein 143 (ZNF143), mRNA."	RefSeq	2.3956	2.66285	-4.96708	-1.20351	0.002791	0.001369	down
TC11000066.hg.1	KCNQ1	NM_000218	"Homo sapiens potassium voltage-gated channel, KQT-like subfamily, member 1 (KCNQ1), transcript variant 1, mRNA."	RefSeq	3.98778	4.25477	-2.37444	-1.2033	0.021645	0.017021	down
TC17001052.hg.1	ZNF594	NM_032530	"Homo sapiens zinc finger protein 594 (ZNF594), mRNA."	RefSeq	2.04469	2.31139	-3.07757	-1.20305	0.010697	0.007304	down
TC21000130.hg.1	SON	NM_032195	"Homo sapiens SON DNA binding protein (SON), transcript variant b, mRNA."	RefSeq	4.53025	4.7969	-3.63203	-1.20301	0.006897	0.002462	down
TC01001113.hg.1	BCL9	NM_004326	"Homo sapiens B-cell CLL/lymphoma 9 (BCL9), mRNA."	RefSeq	3.41153	3.67809	-2.04878	-1.20294	0.033211	0.026443	down
TC05000400.hg.1	MSH3	NM_002439	"Homo sapiens mutS homolog 3 (E. coli) (MSH3), mRNA."	RefSeq	3.80822	4.0745	-2.48348	-1.20271	0.019316	0.017021	down
TC19001721.hg.1	RRAS	NM_006270	"Homo sapiens related RAS viral (r-ras) oncogene homolog (RRAS), mRNA."	RefSeq	6.00098	6.26724	-1.13645	-1.20269	0.157056	0.178875	down
TC03001614.hg.1	SENP7	NM_001077203	"Homo sapiens SUMO1/sentrin specific peptidase 7 (SENP7), transcript variant 2, mRNA."	RefSeq	1.86719	2.1331	-2.21133	-1.2024	0.026604	0.026443	down
TC14000055.hg.1	APEX1	NM_001244249	"Homo sapiens APEX nuclease (multifunctional DNA repair enzyme) 1 (APEX1), transcript variant 4, mRNA."	RefSeq	7.73103	7.99666	-3.3516	-1.20216	0.008526	0.00432	down
TC19000088.hg.1	CHAF1A	NM_005483	"Homo sapiens chromatin assembly factor 1, subunit A (p150) (CHAF1A), mRNA."	RefSeq	3.99747	4.26303	-3.22996	-1.2021	0.009411	0.00432	down
TC05000615.hg.1	ISOC1	NM_016048	"Homo sapiens isochorismatase domain containing 1 (ISOC1), mRNA."	RefSeq	4.27772	4.54316	-2.5432	-1.202	0.018094	0.011282	down
TC07001177.hg.1	TWISTNB	NM_001002926	"Homo sapiens TWIST neighbor (TWISTNB), mRNA."	RefSeq	2.34349	2.60868	-1.63012	-1.20179	0.063485	0.064129	down
TC01001299.hg.1	FDPS	NM_001135822	"Homo sapiens farnesyl diphosphate synthase (FDPS), transcript variant 3, mRNA."	RefSeq	4.74562	5.01066	-4.04472	-1.20167	0.005108	0.001624	down
TC03000803.hg.1	HPS3	NM_032383	"Homo sapiens Hermansky-Pudlak syndrome 3 (HPS3), mRNA."	RefSeq	5.56154	5.82636	-2.98902	-1.20148	0.011633	0.007304	down
TC06000817.hg.1	MANEA	NM_024641	"Homo sapiens mannosidase, endo-alpha (MANEA), mRNA."	RefSeq	1.87942	2.14408	-3.76695	-1.20135	0.006158	0.002462	down
TC17002859.hg.1	BPTF	NM_004459	"Homo sapiens bromodomain PHD finger transcription factor (BPTF), transcript variant 2, mRNA."	RefSeq	4.39186	4.65632	-2.76175	-1.20118	0.014612	0.011282	down
TC08000767.hg.1	EFR3A	NM_015137	"Homo sapiens EFR3 homolog A (S. cerevisiae) (EFR3A), mRNA."	RefSeq	5.24803	5.51236	-3.10145	-1.20107	0.010506	0.007304	down
TC03000930.hg.1	ECT2	NM_018098	"Homo sapiens epithelial cell transforming sequence 2 oncogene (ECT2), transcript variant 3, mRNA."	RefSeq	5.63181	5.89588	-3.0014	-1.20086	0.011493	0.007304	down
TC06000334.hg.1	TRIM15	NM_033229	"Homo sapiens tripartite motif containing 15 (TRIM15), mRNA."	RefSeq	2.97456	3.2386	-2.4085	-1.20084	0.020933	0.017021	down
TC09001059.hg.1	TLN1	NM_006289	"Homo sapiens talin 1 (TLN1), mRNA."	RefSeq	4.75085	5.01486	-3.49162	-1.20081	0.007693	0.00432	down
TC13001723.hg.1	N4BP2L2	NM_033111	"Homo sapiens NEDD4 binding protein 2-like 2 (N4BP2L2), transcript variant 1, mRNA."	RefSeq	3.0659	3.32947	-2.05618	-1.20044	0.032887	0.026443	down
TC19001795.hg.1	ZNF841	NM_001136499	"Homo sapiens zinc finger protein 841 (ZNF841), mRNA."	RefSeq	1.68602	1.94957	-3.62788	-1.20043	0.006935	0.002462	down
TC6_cox_hap2000077.hg.1	SAPCD1	NM_001039651	"Homo sapiens suppressor APC domain containing 1 (SAPCD1), mRNA."	RefSeq	3.29708	3.56032	-3.70924	-1.20017	0.006502	0.002462	down
TC02001271.hg.1	XRCC5	NM_021141	"Homo sapiens X-ray repair complementing defective repair in Chinese hamster cells 5 (double-strand-break rejoining) (XRCC5), mRNA."	RefSeq	6.66363	6.92686	-3.1182	-1.20017	0.010353	0.007304	down
TC20001738.hg.1	PCMTD2	NM_001104925	"Homo sapiens protein-L-isoaspartate (D-aspartate) O-methyltransferase domain containing 2 (PCMTD2), transcript variant 2, mRNA."	RefSeq	5.24737	5.5103	-4.87563	-1.19991	0.002982	0.001369	down
TC02000603.hg.1	EIF5B	NM_015904	"Homo sapiens eukaryotic translation initiation factor 5B (EIF5B), mRNA."	RefSeq	5.00988	5.27254	-1.82806	-1.19969	0.04633	0.042387	down
TC15001612.hg.1	UACA	NM_001008224	"Homo sapiens uveal autoantigen with coiled-coil domains and ankyrin repeats (UACA), transcript variant 2, mRNA."	RefSeq	4.15525	4.41715	-3.96496	-1.19906	0.005344	0.001624	down
TC01001741.hg.1	CD46	NM_002389	"Homo sapiens CD46 molecule, complement regulatory protein (CD46), transcript variant a, mRNA."	RefSeq	6.451	6.71284	-3.08101	-1.19901	0.010652	0.007304	down
TC11001302.hg.1	NUP98	NM_016320	"Homo sapiens nucleoporin 98kDa (NUP98), transcript variant 1, mRNA."	RefSeq	6.24058	6.50172	-2.65162	-1.19843	0.016101	0.011282	down
TC06000427.hg.1	ITPR3	NM_002224	"Homo sapiens inositol 1,4,5-trisphosphate receptor, type 3 (ITPR3), mRNA."	RefSeq	5.01208	5.27321	-2.03363	-1.19842	0.03409	0.026443	down
TC13000119.hg.1	RFC3	NM_181558	"Homo sapiens replication factor C (activator 1) 3, 38kDa (RFC3), transcript variant 2, mRNA."	RefSeq	3.70743	3.96848	-1.87884	-1.19836	0.042759	0.042387	down
TC01002570.hg.1	FOXJ3	NM_001198851	"Homo sapiens forkhead box J3 (FOXJ3), transcript variant 3, mRNA."	RefSeq	5.57063	5.83167	-4.53956	-1.19834	0.003714	0.001369	down
TC03000015.hg.1	BHLHE40	NM_003670	"Homo sapiens basic helix-loop-helix family, member e40 (BHLHE40), mRNA."	RefSeq	3.71565	3.97658	-2.18556	-1.19825	0.027775	0.026443	down
TC05001110.hg.1	LPCAT1	NM_024830	"Homo sapiens lysophosphatidylcholine acyltransferase 1 (LPCAT1), mRNA."	RefSeq	3.94263	4.20339	-3.90048	-1.19811	0.005579	0.001624	down
TC0X000255.hg.1	RBM3	NM_006743	"Homo sapiens RNA binding motif (RNP1, RRM) protein 3 (RBM3), mRNA."	RefSeq	3.89164	4.15238	-2.89673	-1.19809	0.012753	0.007304	down
TC06000383.hg.1	SAPCD1	NM_001039651	"Homo sapiens suppressor APC domain containing 1 (SAPCD1), mRNA."	RefSeq	2.99691	3.2576	-3.7014	-1.19805	0.006553	0.002462	down
TC14001267.hg.1	SYNJ2BP-COX16	NM_001202547	"Homo sapiens SYNJ2BP-COX16 readthrough (SYNJ2BP-COX16), transcript variant 1, mRNA."	RefSeq	4.4396	4.70014	-2.28123	-1.19793	0.024249	0.017021	down
TC04001419.hg.1	H2AFZ	NM_002106	"Homo sapiens H2A histone family, member Z (H2AFZ), mRNA."	RefSeq	5.35977	5.62026	-3.21937	-1.19789	0.009494	0.00432	down
TC02000213.hg.1	BIRC6	NM_016252	"Homo sapiens baculoviral IAP repeat containing 6 (BIRC6), mRNA."	RefSeq	4.91116	5.17143	-1.49497	-1.1977	0.080137	0.064129	down
TC09000624.hg.1	SKA2P1	ENST00000425592	cdna:known chromosome:GRCh37:9:125524123:125524948:1 gene:ENSG00000232387 gene_biotype:protein_coding transcript_biotype:protein_coding	ENSEMBL	3.74012	4.00031	-2.24912	-1.19764	0.025267	0.017021	down
TC15000260.hg.1	FAM98B	NM_001042429	"Homo sapiens family with sequence similarity 98, member B (FAM98B), transcript variant 2, mRNA."	RefSeq	3.80759	4.06737	-2.49996	-1.19729	0.018953	0.017021	down
TC04000214.hg.1	TBC1D1	NM_001253914	"Homo sapiens TBC1 (tre-2/USP6, BUB2, cdc16) domain family, member 1 (TBC1D1), transcript variant 4, mRNA."	RefSeq	2.55843	2.81818	-3.90574	-1.19727	0.00556	0.001624	down
TC08000731.hg.1	NSMCE2	NM_173685	"Homo sapiens non-SMC element 2, MMS21 homolog (S. cerevisiae) (NSMCE2), mRNA."	RefSeq	1.78345	2.04316	-4.53878	-1.19723	0.003721	0.001369	down
TC17000098.hg.1	POLR2A	NM_000937	"Homo sapiens polymerase (RNA) II (DNA directed) polypeptide A, 220kDa (POLR2A), mRNA."	RefSeq	6.05283	6.31254	-4.03426	-1.19723	0.00514	0.001624	down
TC02004954.hg.1	BRE	NM_004899	"Homo sapiens brain and reproductive organ-expressed (TNFRSF1A modulator) (BRE), transcript variant 1, mRNA."	RefSeq	4.48487	4.74441	-4.72161	-1.19709	0.00323	0.001369	down
TC19001061.hg.1	STAP2	NM_001013841	"Homo sapiens signal transducing adaptor family member 2 (STAP2), transcript variant 2, mRNA."	RefSeq	3.85181	4.11128	-3.59161	-1.19704	0.007158	0.002462	down
TC13000303.hg.1	NDFIP2	NM_001161407	"Homo sapiens Nedd4 family interacting protein 2 (NDFIP2), transcript variant 2, mRNA."	RefSeq	5.66717	5.92657	-5.27215	-1.19698	0.002384	0	down
TC16001313.hg.1	TLDC1	NM_020947	"Homo sapiens TBC/LysM-associated domain containing 1 (TLDC1), mRNA."	RefSeq	3.44334	3.70259	-2.64963	-1.19685	0.016127	0.011282	down
TC0X001396.hg.1	FAM122B	NM_001166599	"Homo sapiens family with sequence similarity 122B (FAM122B), transcript variant 2, mRNA."	RefSeq	3.0893	3.34825	-2.82797	-1.1966	0.013651	0.007304	down
TC17_ctg5_hap1000013.hg.1	PLEKHM1	NM_014798	"Homo sapiens pleckstrin homology domain containing, family M (with RUN domain) member 1 (PLEKHM1), transcript variant 1, mRNA."	RefSeq	5.84051	6.09904	-2.96754	-1.19626	0.011856	0.007304	down
TC11000928.hg.1	ENDOD1	NM_015036	"Homo sapiens endonuclease domain containing 1 (ENDOD1), mRNA."	RefSeq	5.53697	5.79548	-1.90242	-1.19625	0.041244	0.042387	down
TC14001085.hg.1	MIS18BP1	NM_018353	"Homo sapiens MIS18 binding protein 1 (MIS18BP1), mRNA."	RefSeq	2.14727	2.40538	-2.15871	-1.19591	0.028698	0.026443	down
TC06001126.hg.1	SNX9	NM_016224	"Homo sapiens sorting nexin 9 (SNX9), mRNA."	RefSeq	6.13182	6.38985	-3.19192	-1.19585	0.009831	0.00432	down
TC09001357.hg.1	FBP1	NM_000507	"Homo sapiens fructose-1,6-bisphosphatase 1 (FBP1), transcript variant 1, mRNA."	RefSeq	3.45653	3.71402	-1.99253	-1.1954	0.036203	0.026443	down
TC13000273.hg.1	KLF5	NM_001730	"Homo sapiens Kruppel-like factor 5 (intestinal) (KLF5), mRNA."	RefSeq	7.30727	7.56465	-3.25547	-1.19531	0.009239	0.00432	down
TC03000146.hg.1	RBMS3	NM_001003792	"Homo sapiens RNA binding motif, single stranded interacting protein 3 (RBMS3), transcript variant 3, mRNA."	RefSeq	1.58496	1.84212	-4.60277	-1.19512	0.003511	0.001369	down
TC04001808.hg.1	MLF1IP	NM_024629	"Homo sapiens MLF1 interacting protein (MLF1IP), mRNA."	RefSeq	2.39033	2.64747	-3.43302	-1.19511	0.008062	0.00432	down
TC6_apd_hap1000039.hg.1	HSPA1A	NM_005345	"Homo sapiens heat shock 70kDa protein 1A (HSPA1A), mRNA."	RefSeq	4.28678	4.54373	-2.23729	-1.19495	0.025668	0.017021	down
TC20000850.hg.1	CHD6	NM_032221	"Homo sapiens chromodomain helicase DNA binding protein 6 (CHD6), mRNA."	RefSeq	3.06038	3.31718	-2.82606	-1.19482	0.013663	0.007304	down
TC04001177.hg.1	FRYL	NM_015030	"Homo sapiens FRY-like (FRYL), mRNA."	RefSeq	2.72428	2.98076	-2.24274	-1.19456	0.025477	0.017021	down
TC16000483.hg.1	CPNE2	NM_152727	"Homo sapiens copine II (CPNE2), mRNA."	RefSeq	4.63023	4.88655	-2.45125	-1.19443	0.019978	0.017021	down
TC14001217.hg.1	ZBTB25	NM_006977	"Homo sapiens zinc finger and BTB domain containing 25 (ZBTB25), mRNA."	RefSeq	3.15617	3.4123	-2.14953	-1.19428	0.02901	0.026443	down
TC11000908.hg.1	KIAA1731	NM_033395	"Homo sapiens KIAA1731 (KIAA1731), mRNA."	RefSeq	2.31863	2.57467	-2.69013	-1.1942	0.015439	0.011282	down
TC12001142.hg.1	NOP2	NM_001033714	"Homo sapiens NOP2 nucleolar protein (NOP2), transcript variant 2, mRNA."	RefSeq	4.44508	4.70102	-3.59539	-1.19412	0.00712	0.002462	down
TC12000425.hg.1	EIF4B	NM_001417	"Homo sapiens eukaryotic translation initiation factor 4B (EIF4B), mRNA."	RefSeq	7.78454	8.04042	-2.70063	-1.19407	0.015293	0.011282	down
TC0X000228.hg.1	UBA1	NM_003334	"Homo sapiens ubiquitin-like modifier activating enzyme 1 (UBA1), transcript variant 1, mRNA."	RefSeq	6.58376	6.83945	-2.38503	-1.1939	0.021384	0.017021	down
TC03003352.hg.1	RBM5	NM_005778	"Homo sapiens RNA binding motif protein 5 (RBM5), transcript variant 1, mRNA."	RefSeq	3.69151	3.94706	-2.93203	-1.19379	0.012263	0.007304	down
TC14000194.hg.1	G2E3	NM_017769	"Homo sapiens G2/M-phase specific E3 ubiquitin protein ligase (G2E3), mRNA."	RefSeq	2.62216	2.87767	-2.15501	-1.19376	0.028838	0.026443	down
TC20000407.hg.1	PARD6B	NM_032521	"Homo sapiens par-6 partitioning defective 6 homolog beta (C. elegans) (PARD6B), mRNA."	RefSeq	4.71126	4.96649	-2.34503	-1.19353	0.022327	0.017021	down
TC6_qbl_hap6000069.hg.1	HSPA1A	NM_005345	"Homo sapiens heat shock 70kDa protein 1A (HSPA1A), mRNA."	RefSeq	4.28587	4.54105	-2.27755	-1.19349	0.024325	0.017021	down
TC08001511.hg.1	LRP12	NM_001135703	"Homo sapiens low density lipoprotein receptor-related protein 12 (LRP12), transcript variant 2, mRNA."	RefSeq	1.78151	2.03664	-3.4368	-1.19344	0.008017	0.00432	down
TC02000393.hg.1	ETAA1	NM_019002	"Homo sapiens Ewing tumor-associated antigen 1 (ETAA1), mRNA."	RefSeq	2.64165	2.89678	-2.97026	-1.19344	0.011785	0.007304	down
TC04001355.hg.1	WDFY3	NM_014991	"Homo sapiens WD repeat and FYVE domain containing 3 (WDFY3), mRNA."	RefSeq	3.50828	3.76318	-2.19516	-1.19325	0.027362	0.026443	down
TC6_qbl_hap6000161.hg.1	VARS	NM_006295	"Homo sapiens valyl-tRNA synthetase (VARS), nuclear gene encoding mitochondrial protein, mRNA."	RefSeq	3.61759	3.87245	-3.3074	-1.19321	0.008819	0.00432	down
TC17001794.hg.1	ICAM2	NM_000873	"Homo sapiens intercellular adhesion molecule 2 (ICAM2), transcript variant 5, mRNA."	RefSeq	2.31407	2.56891	-3.5154	-1.1932	0.007527	0.002462	down
TC01000398.hg.1	PTPRU	NM_001195001	"Homo sapiens protein tyrosine phosphatase, receptor type, U (PTPRU), transcript variant 4, mRNA."	RefSeq	3.75926	4.01401	-3.33038	-1.19313	0.008635	0.00432	down
TC17001873.hg.1	SUMO2	NM_001005849	"Homo sapiens SMT3 suppressor of mif two 3 homolog 2 (S. cerevisiae) (SUMO2), transcript variant 2, mRNA."	RefSeq	7.67355	7.92824	-2.27176	-1.19308	0.024593	0.017021	down
TC04002955.hg.1	ARAP2	NM_015230	"Homo sapiens ArfGAP with RhoGAP domain, ankyrin repeat and PH domain 2 (ARAP2), mRNA."	RefSeq	1.78623	2.0406	-3.37903	-1.19281	0.008399	0.00432	down
TC10000067.hg.1	ATP5C1	NM_001001973	"Homo sapiens ATP synthase, H+ transporting, mitochondrial F1 complex, gamma polypeptide 1 (ATP5C1), nuclear gene encoding mitochondrial protein, transcript variant 1, mRNA."	RefSeq	6.79043	7.04467	-2.89683	-1.19271	0.012747	0.007304	down
TC06001809.hg.1	ICK	NM_014920	"Homo sapiens intestinal cell (MAK-like) kinase (ICK), transcript variant 1, mRNA."	RefSeq	4.33514	4.5891	-3.27574	-1.19247	0.009106	0.00432	down
TC05001875.hg.1	PCDH1	NM_002587	"Homo sapiens protocadherin 1 (PCDH1), transcript variant 1, mRNA."	RefSeq	3.07616	3.33002	-1.93405	-1.19239	0.03936	0.042387	down
TC19000316.hg.1	TPM4	NM_003290	"Homo sapiens tropomyosin 4 (TPM4), transcript variant 2, mRNA."	RefSeq	6.91712	7.17082	-3.68843	-1.19225	0.006591	0.002462	down
TC19002608.hg.1	NUP62	NM_001193357	"Homo sapiens nucleoporin 62kDa (NUP62), transcript variant 5, mRNA."	RefSeq	4.98278	5.23638	-2.67625	-1.19217	0.0157	0.011282	down
TC04001069.hg.1	DCAF16	NM_017741	"Homo sapiens DDB1 and CUL4 associated factor 16 (DCAF16), mRNA."	RefSeq	5.92174	6.17529	-3.27984	-1.19213	0.009074	0.00432	down
TC07003351.hg.1	HOXA3	NM_030661	"Homo sapiens homeobox A3 (HOXA3), transcript variant 1, mRNA."	RefSeq	3.63252	3.88594	-5.6139	-1.19203	0.001932	0	down
TC06000889.hg.1	SLC16A10	NM_018593	"Homo sapiens solute carrier family 16, member 10 (aromatic amino acid transporter) (SLC16A10), mRNA."	RefSeq	1.58496	1.83837	-4.58698	-1.19202	0.003587	0.001369	down
TC12001602.hg.1	STAT2	NM_005419	"Homo sapiens signal transducer and activator of transcription 2, 113kDa (STAT2), transcript variant 1, mRNA."	RefSeq	3.53521	3.78825	-2.7312	-1.19171	0.01493	0.011282	down
TC02002660.hg.1	KCTD18	NM_152387	"Homo sapiens potassium channel tetramerisation domain containing 18 (KCTD18), mRNA."	RefSeq	3.41141	3.66436	-2.95026	-1.19164	0.012034	0.007304	down
TC11001059.hg.1	TMPRSS4	NM_001083947	"Homo sapiens transmembrane protease, serine 4 (TMPRSS4), transcript variant 3, mRNA."	RefSeq	1.70819	1.961	-3.55137	-1.19153	0.007323	0.002462	down
TC04000773.hg.1	MND1	NM_001253861	"Homo sapiens meiotic nuclear divisions 1 homolog (S. cerevisiae) (MND1), transcript variant 2, mRNA."	RefSeq	2.82256	3.07528	-1.98414	-1.19145	0.036598	0.026443	down
TC14000443.hg.1	C14orf169	NM_024644	"Homo sapiens chromosome 14 open reading frame 169 (C14orf169), mRNA."	RefSeq	2.14011	2.39265	-2.08334	-1.19131	0.03162	0.026443	down
TC12001845.hg.1	CDK17	NM_001170464	"Homo sapiens cyclin-dependent kinase 17 (CDK17), transcript variant 2, mRNA."	RefSeq	3.84746	4.09994	-2.95404	-1.19125	0.011989	0.007304	down
TC6_cox_hap2000078.hg.1	HSPA1A	NM_005345	"Homo sapiens heat shock 70kDa protein 1A (HSPA1A), mRNA."	RefSeq	4.28832	4.5407	-2.25633	-1.19117	0.025057	0.017021	down
TC06000978.hg.1	L3MBTL3	NM_001007102	"Homo sapiens l(3)mbt-like 3 (Drosophila) (L3MBTL3), transcript variant 2, mRNA."	RefSeq	3.163	3.41528	-3.32736	-1.19109	0.00866	0.00432	down
TC11000936.hg.1	JRKL	NM_003772	"Homo sapiens jerky homolog-like (mouse) (JRKL), transcript variant 1, mRNA."	RefSeq	1.7825	2.03469	-3.73108	-1.19101	0.006362	0.002462	down
TC08001013.hg.1	MTUS1	NM_001001924	"Homo sapiens microtubule associated tumor suppressor 1 (MTUS1), transcript variant 1, mRNA."	RefSeq	2.2819	2.534	-2.65625	-1.19094	0.016006	0.011282	down
TC02002377.hg.1	DARS	NM_001349	"Homo sapiens aspartyl-tRNA synthetase (DARS), mRNA."	RefSeq	5.49758	5.74953	-2.90894	-1.19082	0.012575	0.007304	down
TC0X001174.hg.1	MAGT1	NM_032121	"Homo sapiens magnesium transporter 1 (MAGT1), mRNA."	RefSeq	5.93869	6.19062	-2.7694	-1.1908	0.01451	0.011282	down
TC04001507.hg.1	MAD2L1	NM_002358	"Homo sapiens MAD2 mitotic arrest deficient-like 1 (yeast) (MAD2L1), mRNA."	RefSeq	4.41991	4.67178	-2.12399	-1.19075	0.029971	0.026443	down
TC01003278.hg.1	GATAD2B	NM_020699	"Homo sapiens GATA zinc finger domain containing 2B (GATAD2B), mRNA."	RefSeq	5.41925	5.67099	-2.8047	-1.19064	0.014007	0.011282	down
TC19001479.hg.1	ZNF585A	NM_152655	"Homo sapiens zinc finger protein 585A (ZNF585A), transcript variant 1, mRNA."	RefSeq	2.32993	2.58166	-2.54274	-1.19063	0.0181	0.011282	down
TC07001663.hg.1	GATS	NM_178831	"Homo sapiens GATS, stromal antigen 3 opposite strand (GATS), transcript variant 1, mRNA."	RefSeq	2.3661	2.61751	-2.82402	-1.19037	0.013695	0.007304	down
TC01001476.hg.1	C1orf112	NM_018186	"Homo sapiens chromosome 1 open reading frame 112 (C1orf112), mRNA."	RefSeq	2.02979	2.28091	-4.78324	-1.19013	0.003097	0.001369	down
TC08000571.hg.1	PDP1	NM_001161778	"[retired] Homo sapiens pyruvate dehyrogenase phosphatase catalytic subunit 1 (PDP1), nuclear gene encoding mitochondrial protein, transcript variant 1, mRNA."	RefSeq	6.02194	6.27286	-1.71351	-1.18996	0.055395	0.042387	down
TC01003679.hg.1	KIF14	NM_014875	"Homo sapiens kinesin family member 14 (KIF14), mRNA."	RefSeq	2.0398	2.29068	-1.95718	-1.18993	0.037985	0.026443	down
TC06001896.hg.1	HMGN3	NM_001201362	"Homo sapiens high mobility group nucleosomal binding domain 3 (HMGN3), transcript variant 3, mRNA."	RefSeq	3.0485	3.29928	-2.86877	-1.18985	0.013135	0.007304	down
TC09000357.hg.1	CEP78	NM_001098802	"Homo sapiens centrosomal protein 78kDa (CEP78), transcript variant 1, mRNA."	RefSeq	2.694	2.94433	-3.15489	-1.18948	0.010086	0.00432	down
TC01001781.hg.1	FLVCR1	NM_014053	"Homo sapiens feline leukemia virus subgroup C cellular receptor 1 (FLVCR1), mRNA."	RefSeq	2.79749	3.0477	-1.94899	-1.18938	0.03845	0.026443	down
TC19000505.hg.1	ZNF567	NM_152603	"Homo sapiens zinc finger protein 567 (ZNF567), mRNA."	RefSeq	2.30453	2.55462	-1.95231	-1.18928	0.038291	0.026443	down
TC07001619.hg.1	SLC25A13	NM_001160210	"Homo sapiens solute carrier family 25 (aspartate/glutamate carrier), member 13 (SLC25A13), nuclear gene encoding mitochondrial protein, transcript variant 1, mRNA."	RefSeq	4.25462	4.5046	-2.80443	-1.18919	0.014013	0.011282	down
TC11002160.hg.1	CREBZF	NM_001039618	"Homo sapiens CREB/ATF bZIP transcription factor (CREBZF), transcript variant 1, mRNA."	RefSeq	3.95957	4.20935	-1.99575	-1.18903	0.036082	0.026443	down
TC09001403.hg.1	TRIM14	NM_033220	"Homo sapiens tripartite motif containing 14 (TRIM14), transcript variant 3, mRNA."	RefSeq	3.01986	3.26929	-3.55194	-1.18873	0.007317	0.002462	down
TC10001281.hg.1	AGAP7	NM_001077685	"Homo sapiens ArfGAP with GTPase domain, ankyrin repeat and PH domain 7 (AGAP7), mRNA."	RefSeq	5.6175	5.86669	-1.77461	-1.18854	0.050417	0.042387	down
TC0X000992.hg.1	SLC9A7	NM_032591	"Homo sapiens solute carrier family 9, subfamily A (NHE7, cation proton antiporter 7), member 7 (SLC9A7), transcript variant 2, mRNA."	RefSeq	4.8127	5.06186	-1.99943	-1.18851	0.03591	0.026443	down
TC11002305.hg.1	ZW10	NM_004724	"Homo sapiens zw10 kinetochore protein (ZW10), mRNA."	RefSeq	3.55264	3.80171	-1.73724	-1.18844	0.053453	0.042387	down
TC03001590.hg.1	PROS1	NM_000313	"Homo sapiens protein S (alpha) (PROS1), mRNA."	RefSeq	2.06161	2.31061	-2.73258	-1.18838	0.014898	0.011282	down
TC12000331.hg.1	ARID2	NM_152641	"Homo sapiens AT rich interactive domain 2 (ARID, RFX-like) (ARID2), mRNA."	RefSeq	4.5269	4.77589	-2.32829	-1.18837	0.022772	0.017021	down
TC01000707.hg.1	USP1	NM_001017415	"Homo sapiens ubiquitin specific peptidase 1 (USP1), transcript variant 2, mRNA."	RefSeq	4.62434	4.873	-2.70902	-1.1881	0.015185	0.011282	down
TC01003343.hg.1	IQGAP3	NM_178229	"Homo sapiens IQ motif containing GTPase activating protein 3 (IQGAP3), mRNA."	RefSeq	4.03989	4.28844	-2.07064	-1.18801	0.032269	0.026443	down
TC06001934.hg.1	RNGTT	NM_003800	"Homo sapiens RNA guanylyltransferase and 5'-phosphatase (RNGTT), mRNA."	RefSeq	3.89834	4.14671	-2.41064	-1.18786	0.020837	0.017021	down
TC02002549.hg.1	KIAA1715	NM_030650	"Homo sapiens KIAA1715 (KIAA1715), mRNA."	RefSeq	2.79358	3.04185	-3.88838	-1.18779	0.005617	0.001624	down
TC15002809.hg.1	PPIP5K1	ENST00000396907	[retired] cdna:known chromosome:GRCh37:15:43965116:43976941:-1 gene:ENSG00000168781 gene_biotype:protein_coding transcript_biotype:protein_coding	ENSEMBL	4.46336	4.71132	-3.12206	-1.18752	0.010328	0.007304	down
TC02000235.hg.1	NDUFAF7	NM_001083946	"Homo sapiens NADH dehydrogenase (ubiquinone) complex I, assembly factor 7 (NDUFAF7), nuclear gene encoding mitochondrial protein, transcript variant 3, mRNA."	RefSeq	4.11019	4.35813	-3.79653	-1.18751	0.005968	0.002462	down
TC09000519.hg.1	RNF20	NM_019592	"Homo sapiens ring finger protein 20, E3 ubiquitin protein ligase (RNF20), mRNA."	RefSeq	4.10286	4.35072	-2.48635	-1.18745	0.019258	0.017021	down
TC05000234.hg.1	SKIV2L2	NM_015360	"Homo sapiens superkiller viralicidic activity 2-like 2 (S. cerevisiae) (SKIV2L2), mRNA."	RefSeq	4.43912	4.68688	-2.00277	-1.18737	0.0357	0.026443	down
TC14001220.hg.1	SPTB	NM_000347	"Homo sapiens spectrin, beta, erythrocytic (SPTB), transcript variant 2, mRNA."	RefSeq	2.35886	2.60652	-3.03796	-1.18728	0.011092	0.007304	down
TC04000856.hg.1	SAP30	NM_003864	"Homo sapiens Sin3A-associated protein, 30kDa (SAP30), mRNA."	RefSeq	2.78022	3.02772	-2.00586	-1.18715	0.035465	0.026443	down
TC08000577.hg.1	DPY19L4	NM_181787	"Homo sapiens dpy-19-like 4 (C. elegans) (DPY19L4), mRNA."	RefSeq	3.24014	3.48764	-2.54102	-1.18715	0.018144	0.011282	down
TC0Y000054.hg.1	TMSB4Y	NM_004202	"Homo sapiens thymosin beta 4, Y-linked (TMSB4Y), mRNA."	RefSeq	2.1045	2.35197	-2.30642	-1.18713	0.023453	0.017021	down
TC09000627.hg.1	RABGAP1	NM_012197	"Homo sapiens RAB GTPase activating protein 1 (RABGAP1), mRNA."	RefSeq	3.13507	3.38252	-3.8823	-1.18711	0.005662	0.002462	down
TC03001285.hg.1	EPM2AIP1	NM_014805	"Homo sapiens EPM2A (laforin) interacting protein 1 (EPM2AIP1), mRNA."	RefSeq	2.94947	3.19629	-2.98189	-1.18659	0.011677	0.007304	down
TC13000437.hg.1	CHAMP1	NM_001164144	"Homo sapiens chromosome alignment maintaining phosphoprotein 1 (CHAMP1), transcript variant 2, mRNA."	RefSeq	3.50459	3.75134	-2.95568	-1.18654	0.011964	0.007304	down
TC12000885.hg.1	OAS3	NM_006187	"Homo sapiens 2'-5'-oligoadenylate synthetase 3, 100kDa (OAS3), mRNA."	RefSeq	4.01991	4.26642	-2.88442	-1.18633	0.012931	0.007304	down
TC16000445.hg.1	CHD9	NM_025134	"Homo sapiens chromodomain helicase DNA binding protein 9 (CHD9), mRNA."	RefSeq	2.15751	2.40392	-1.85255	-1.18625	0.044637	0.042387	down
TC22001438.hg.1	IGLV9-49	ENST00000427632	cdna:known chromosome:GRCh37:22:22697539:22698084:1 gene:ENSG00000223350 gene_biotype:IG_V_gene transcript_biotype:IG_V_gene	ENSEMBL	2.1025	2.34884	-4.72047	-1.18619	0.003237	0.001369	down
TC01006365.hg.1	BCAS2	NM_005872	"Homo sapiens breast carcinoma amplified sequence 2 (BCAS2), mRNA."	RefSeq	4.80707	5.05338	-1.83005	-1.18618	0.046216	0.042387	down
TC19000275.hg.1	CYP4F12	NM_023944	"Homo sapiens cytochrome P450, family 4, subfamily F, polypeptide 12 (CYP4F12), mRNA."	RefSeq	1.83186	2.0778	-3.68512	-1.18587	0.006604	0.002462	down
TC17001302.hg.1	KIAA0100	NM_014680	"Homo sapiens KIAA0100 (KIAA0100), mRNA."	RefSeq	5.72896	5.97483	-3.4575	-1.18581	0.007852	0.00432	down
TC02001126.hg.1	MYO1B	NM_001161819	"Homo sapiens myosin IB (MYO1B), transcript variant 3, mRNA."	RefSeq	5.8068	6.05254	-2.37825	-1.1857	0.021544	0.017021	down
TC6_qbl_hap6000120.hg.1	RNF39	NM_025236	"Homo sapiens ring finger protein 39 (RNF39), transcript variant 1, mRNA."	RefSeq	3.06009	3.3058	-1.92849	-1.18568	0.039691	0.042387	down
TC11001748.hg.1	FNBP4	NM_015308	"Homo sapiens formin binding protein 4 (FNBP4), mRNA."	RefSeq	4.21134	4.45698	-1.9687	-1.18562	0.037463	0.026443	down
TC18000556.hg.1	KDSR	NM_002035	"Homo sapiens 3-ketodihydrosphingosine reductase (KDSR), mRNA."	RefSeq	5.61089	5.85653	-2.02812	-1.18562	0.034363	0.026443	down
TC0X000081.hg.1	TXLNG	NM_001168683	"Homo sapiens taxilin gamma (TXLNG), transcript variant 2, mRNA."	RefSeq	2.5587	2.80413	-2.58822	-1.18545	0.017323	0.011282	down
TC04001220.hg.1	PPAT	NM_002703	"Homo sapiens phosphoribosyl pyrophosphate amidotransferase (PPAT), mRNA."	RefSeq	4.33939	4.58469	-3.93626	-1.18535	0.005465	0.001624	down
TC01002766.hg.1	DEPDC1	NM_001114120	"Homo sapiens DEP domain containing 1 (DEPDC1), transcript variant 1, mRNA."	RefSeq	3.92416	4.16923	-1.81544	-1.18515	0.047272	0.042387	down
TC07001764.hg.1	TMEM168	NM_022484	"Homo sapiens transmembrane protein 168 (TMEM168), mRNA."	RefSeq	2.2739	2.51887	-2.04258	-1.18507	0.033593	0.026443	down
TC05000431.hg.1	RASA1	NM_002890	"Homo sapiens RAS p21 protein activator (GTPase activating protein) 1 (RASA1), transcript variant 1, mRNA."	RefSeq	3.6064	3.85135	-2.65712	-1.18505	0.015974	0.011282	down
TC08000578.hg.1	INTS8	NM_017864	"Homo sapiens integrator complex subunit 8 (INTS8), transcript variant 1, mRNA."	RefSeq	2.65007	2.895	-2.96828	-1.18504	0.011843	0.007304	down
TC04000699.hg.1	GAB1	NM_002039	"Homo sapiens GRB2-associated binding protein 1 (GAB1), transcript variant 2, mRNA."	RefSeq	2.725	2.96971	-3.68339	-1.18485	0.006623	0.002462	down
TC15001690.hg.1	TSPAN3	NM_001168412	"Homo sapiens tetraspanin 3 (TSPAN3), transcript variant 3, mRNA."	RefSeq	4.29642	4.541	-2.04685	-1.18475	0.033326	0.026443	down
TC09000535.hg.1	SLC44A1	NM_080546	"Homo sapiens solute carrier family 44, member 1 (SLC44A1), mRNA."	RefSeq	5.7898	6.0343	-3.04281	-1.18468	0.011047	0.007304	down
TC01001204.hg.1	PIP5K1A	NM_001135636	"Homo sapiens phosphatidylinositol-4-phosphate 5-kinase, type I, alpha (PIP5K1A), transcript variant 3, mRNA."	RefSeq	6.16311	6.40746	-2.8864	-1.18456	0.012893	0.007304	down
TC17000459.hg.1	MRPL45	NM_032351	"Homo sapiens mitochondrial ribosomal protein L45 (MRPL45), nuclear gene encoding mitochondrial protein, mRNA."	RefSeq	5.81617	6.06044	-1.18638	-1.18449	0.142377	0.178875	down
TC02000942.hg.1	ARL6IP6	NM_152522	"Homo sapiens ADP-ribosylation-like factor 6 interacting protein 6 (ARL6IP6), transcript variant 1, mRNA."	RefSeq	2.98625	3.23036	-4.09097	-1.18436	0.004936	0.001624	down
TC14001462.hg.1	DDX24	NM_020414	"Homo sapiens DEAD (Asp-Glu-Ala-Asp) box polypeptide 24 (DDX24), mRNA."	RefSeq	5.77496	6.01896	-4.20238	-1.18428	0.004612	0.001624	down
TC14001324.hg.1	C14orf1	NM_007176	"Homo sapiens chromosome 14 open reading frame 1 (C14orf1), mRNA."	RefSeq	6.89523	7.13915	-3.16941	-1.1842	0.009965	0.00432	down
TC10001341.hg.1	HERC4	NM_015601	"Homo sapiens HECT and RLD domain containing E3 ubiquitin protein ligase 4 (HERC4), transcript variant 2, mRNA."	RefSeq	2.97396	3.21763	-2.1031	-1.18399	0.030754	0.026443	down
TC10000340.hg.1	AGAP6	NM_001077665	"Homo sapiens ArfGAP with GTPase domain, ankyrin repeat and PH domain 6 (AGAP6), mRNA."	RefSeq	5.43382	5.67735	-1.51605	-1.18389	0.077005	0.064129	down
TC17001743.hg.1	TRIM37	NM_001005207	"Homo sapiens tripartite motif containing 37 (TRIM37), transcript variant 2, mRNA."	RefSeq	4.15638	4.39987	-2.44357	-1.18386	0.020067	0.017021	down
TC02002644.hg.1	PGAP1	NM_024989	"Homo sapiens post-GPI attachment to proteins 1 (PGAP1), mRNA."	RefSeq	1.76968	2.01315	-2.72008	-1.18384	0.015064	0.011282	down
TC09000384.hg.1	RMI1	NM_024945	"Homo sapiens RMI1, RecQ mediated genome instability 1, homolog (S. cerevisiae) (RMI1), mRNA."	RefSeq	2.90527	3.14862	-2.16308	-1.18374	0.028501	0.026443	down
TC05000010.hg.1	TRIP13	NM_001166260	"Homo sapiens thyroid hormone receptor interactor 13 (TRIP13), transcript variant 2, mRNA."	RefSeq	3.84056	4.08381	-3.43333	-1.18366	0.008043	0.00432	down
TC02000952.hg.1	GPD2	NM_000408	"Homo sapiens glycerol-3-phosphate dehydrogenase 2 (mitochondrial) (GPD2), nuclear gene encoding mitochondrial protein, transcript variant 2, mRNA."	RefSeq	2.86563	3.10846	-2.63728	-1.18331	0.016279	0.011282	down
TC02000742.hg.1	DDX18	NM_006773	"Homo sapiens DEAD (Asp-Glu-Ala-Asp) box polypeptide 18 (DDX18), mRNA."	RefSeq	3.8861	4.12891	-2.67857	-1.1833	0.01563	0.011282	down
TC01001458.hg.1	POU2F1	NM_001198783	"Homo sapiens POU class 2 homeobox 1 (POU2F1), transcript variant 2, mRNA."	RefSeq	4.97815	5.22091	-3.77851	-1.18325	0.006076	0.002462	down
TC17001768.hg.1	NACA2	NM_199290	"Homo sapiens nascent polypeptide-associated complex alpha subunit 2 (NACA2), mRNA."	RefSeq	3.306	3.54849	-1.21054	-1.18303	0.136152	0.178875	down
TC09001374.hg.1	SLC35D2	NM_007001	"Homo sapiens solute carrier family 35, member D2 (SLC35D2), mRNA."	RefSeq	2.64523	2.88763	-3.46846	-1.18296	0.007801	0.00432	down
TC17000525.hg.1	ATP6V0A1	NM_001130020	"Homo sapiens ATPase, H+ transporting, lysosomal V0 subunit a1 (ATP6V0A1), transcript variant 1, mRNA."	RefSeq	5.57087	5.81315	-3.12293	-1.18286	0.010315	0.007304	down
TC02000348.hg.1	REL	NM_002908	"Homo sapiens v-rel reticuloendotheliosis viral oncogene homolog (avian) (REL), mRNA."	RefSeq	4.50035	4.74247	-2.67887	-1.18273	0.015611	0.011282	down
TC04000327.hg.1	CEP135	NM_025009	"Homo sapiens centrosomal protein 135kDa (CEP135), mRNA."	RefSeq	1.9065	2.14862	-2.76127	-1.18273	0.014618	0.011282	down
TC06000615.hg.1	HSP90AB1	NM_007355	"Homo sapiens heat shock protein 90kDa alpha (cytosolic), class B member 1 (HSP90AB1), transcript variant 2, mRNA."	RefSeq	9.14446	9.38655	-3.10928	-1.18271	0.010449	0.007304	down
TC05000844.hg.1	G3BP1	NM_005754	"Homo sapiens GTPase activating protein (SH3 domain) binding protein 1 (G3BP1), transcript variant 1, mRNA."	RefSeq	5.80896	6.05033	-3.85896	-1.18212	0.005764	0.002462	down
TC02001663.hg.1	ASXL2	NM_018263	"Homo sapiens additional sex combs like 2 (Drosophila) (ASXL2), mRNA."	RefSeq	4.5442	4.78556	-3.05457	-1.18211	0.010945	0.007304	down
TC17001536.hg.1	PSMC3IP	NM_001256014	"Homo sapiens PSMC3 interacting protein (PSMC3IP), transcript variant 3, mRNA."	RefSeq	3.0918	3.33302	-2.69673	-1.18199	0.015337	0.011282	down
TC01003505.hg.1	KIFAP3	NM_001204514	"Homo sapiens kinesin-associated protein 3 (KIFAP3), transcript variant 2, mRNA."	RefSeq	1.65695	1.8981	-5.09693	-1.18193	0.002632	0.001369	down
TC14001140.hg.1	TXNDC16	NM_001160047	"Homo sapiens thioredoxin domain containing 16 (TXNDC16), transcript variant 2, mRNA."	RefSeq	1.66389	1.90489	-4.5535	-1.18181	0.00367	0.001369	down
TC05000907.hg.1	HMMR	NM_001142556	"Homo sapiens hyaluronan-mediated motility receptor (RHAMM) (HMMR), transcript variant 1, mRNA."	RefSeq	3.20233	3.44305	-1.93618	-1.18158	0.039182	0.042387	down
TC03001374.hg.1	CDC25A	NM_001789	"Homo sapiens cell division cycle 25A (CDC25A), transcript variant 1, mRNA."	RefSeq	2.56461	2.80503	-2.86167	-1.18134	0.013256	0.007304	down
TC03000524.hg.1	CEP97	NM_024548	"Homo sapiens centrosomal protein 97kDa (CEP97), mRNA."	RefSeq	2.4228	2.66315	-2.53266	-1.18127	0.018342	0.011282	down
TC01002886.hg.1	F3	NM_001178096	"Homo sapiens coagulation factor III (thromboplastin, tissue factor) (F3), transcript variant 2, mRNA."	RefSeq	4.49468	4.735	-3.25827	-1.18125	0.009195	0.00432	down
TC18000376.hg.1	CEP76	NM_024899	"Homo sapiens centrosomal protein 76kDa (CEP76), transcript variant 1, mRNA."	RefSeq	3.52469	3.76498	-1.5834	-1.18123	0.068908	0.064129	down
TC03001939.hg.1	CCNL1	NM_020307	"Homo sapiens cyclin L1 (CCNL1), mRNA."	RefSeq	3.53701	3.77707	-2.27799	-1.18104	0.024306	0.017021	down
TC04000175.hg.1	ZCCHC4	NM_024936	"Homo sapiens zinc finger, CCHC domain containing 4 (ZCCHC4), mRNA."	RefSeq	2.05413	2.294	-2.40755	-1.18088	0.020945	0.017021	down
TCUn_gl000223000004.hg.1	ZNF84	NM_001127372	"Homo sapiens zinc finger protein 84 (ZNF84), transcript variant 2, mRNA."	RefSeq	4.34075	4.58025	-2.88262	-1.18058	0.012963	0.007304	down
TC02002693.hg.1	INO80D	NM_017759	"Homo sapiens INO80 complex subunit D (INO80D), mRNA."	RefSeq	4.25435	4.49372	-2.15476	-1.18048	0.028851	0.026443	down
TC07001601.hg.1	PEX1	NM_000466	"Homo sapiens peroxisomal biogenesis factor 1 (PEX1), mRNA."	RefSeq	3.17474	3.41371	-3.40352	-1.18015	0.008278	0.00432	down
TC06004082.hg.1	PSMB9	NM_002800	"Homo sapiens proteasome (prosome, macropain) subunit, beta type, 9 (PSMB9), mRNA."	RefSeq	2.19227	2.43093	-2.77379	-1.17989	0.014446	0.011282	down
TC14002303.hg.1	FLVCR2	NM_001195283	"Homo sapiens feline leukemia virus subgroup C cellular receptor family, member 2 (FLVCR2), transcript variant 2, mRNA."	RefSeq	2.46365	2.70183	-2.50983	-1.17951	0.018736	0.011282	down
TC22000535.hg.1	LOC101060682	ENST00000401924	cdna:known chromosome:GRCh37:22:21562263:21581926:-1 gene:ENSG00000133475 gene_biotype:protein_coding transcript_biotype:protein_coding	ENSEMBL	4.11723	4.35537	-3.06222	-1.17948	0.010863	0.007304	down
TC01000313.hg.1	SRRM1	NM_005839	"Homo sapiens serine/arginine repetitive matrix 1 (SRRM1), mRNA."	RefSeq	5.82072	6.05876	-3.20753	-1.17939	0.009647	0.00432	down
TC05000519.hg.1	WDR36	NM_139281	"Homo sapiens WD repeat domain 36 (WDR36), mRNA."	RefSeq	4.91399	5.15165	-3.02058	-1.17909	0.011264	0.007304	down
TC0X000464.hg.1	DIAPH2	NM_006729	"Homo sapiens diaphanous homolog 2 (Drosophila) (DIAPH2), transcript variant 156, mRNA."	RefSeq	2.83247	3.06957	-2.8922	-1.17862	0.012823	0.007304	down
TC02002793.hg.1	TUBA4A	NM_006000	"Homo sapiens tubulin, alpha 4a (TUBA4A), mRNA."	RefSeq	5.34576	5.58263	-3.05393	-1.17843	0.010958	0.007304	down
TC12000564.hg.1	SRGAP1	NM_020762	"Homo sapiens SLIT-ROBO Rho GTPase activating protein 1 (SRGAP1), mRNA."	RefSeq	4.61326	4.85009	-2.536	-1.17841	0.018234	0.011282	down
TC15000635.hg.1	PAQR5	NM_001104554	"Homo sapiens progestin and adipoQ receptor family member V (PAQR5), transcript variant 1, mRNA."	RefSeq	4.82003	5.05682	-1.07124	-1.17836	0.178654	0.270995	down
TC14000159.hg.1	PSME1	NM_006263	"Homo sapiens proteasome (prosome, macropain) activator subunit 1 (PA28 alpha) (PSME1), transcript variant 1, mRNA."	RefSeq	6.56624	6.80295	-1.7525	-1.1783	0.052155	0.042387	down
TC07003400.hg.1	CCZ1B	NM_198097	"Homo sapiens CCZ1 vacuolar protein trafficking and biogenesis associated homolog B (S. cerevisiae) (CCZ1B), mRNA."	RefSeq	2.86399	3.10064	-3.51641	-1.17826	0.007521	0.002462	down
TC01006332.hg.1	EFNA4	NM_005227	"Homo sapiens ephrin-A4 (EFNA4), transcript variant 1, mRNA."	RefSeq	3.42099	3.65761	-2.07774	-1.17823	0.031856	0.026443	down
TC0X000170.hg.1	XK	NM_021083	"Homo sapiens X-linked Kx blood group (McLeod syndrome) (XK), mRNA."	RefSeq	3.21918	3.45578	-2.46435	-1.17821	0.019749	0.017021	down
TC0X001191.hg.1	CHM	NM_000390	"Homo sapiens choroideremia (Rab escort protein 1) (CHM), transcript variant 1, mRNA."	RefSeq	2.36586	2.60243	-1.64966	-1.17818	0.061416	0.064129	down
TC01000895.hg.1	AGL	NM_000028	"Homo sapiens amylo-alpha-1, 6-glucosidase, 4-alpha-glucanotransferase (AGL), transcript variant 4, mRNA."	RefSeq	2.79195	3.0285	-2.04341	-1.17818	0.033523	0.026443	down
TC06002152.hg.1	IFNGR1	NM_000416	"Homo sapiens interferon gamma receptor 1 (IFNGR1), mRNA."	RefSeq	6.15862	6.39497	-2.20126	-1.17801	0.027081	0.026443	down
TC06000035.hg.1	PRPF4B	NM_003913	"Homo sapiens PRP4 pre-mRNA processing factor 4 homolog B (yeast) (PRPF4B), mRNA."	RefSeq	1.84396	2.08028	-2.99144	-1.17799	0.011582	0.007304	down
TC03001866.hg.1	PLOD2	NM_000935	"Homo sapiens procollagen-lysine, 2-oxoglutarate 5-dioxygenase 2 (PLOD2), transcript variant 2, mRNA."	RefSeq	4.9516	5.18781	-3.16776	-1.17789	0.009997	0.00432	down
TC17001336.hg.1	CRLF3	NM_015986	"Homo sapiens cytokine receptor-like factor 3 (CRLF3), transcript variant 1, mRNA."	RefSeq	2.56741	2.80358	-2.21871	-1.17786	0.026279	0.017021	down
TC04000542.hg.1	TET2	NM_017628	"Homo sapiens tet methylcytosine dioxygenase 2 (TET2), transcript variant 2, mRNA."	RefSeq	2.47492	2.71102	-2.22577	-1.17781	0.026025	0.017021	down
TC02002845.hg.1	PID1	NM_001100818	"Homo sapiens phosphotyrosine interaction domain containing 1 (PID1), transcript variant 2, mRNA."	RefSeq	1.71451	1.95052	-3.93859	-1.17773	0.005446	0.001624	down
TC17001758.hg.1	HEATR6	NM_022070	"Homo sapiens HEAT repeat containing 6 (HEATR6), mRNA."	RefSeq	3.41881	3.65479	-2.37715	-1.17771	0.021582	0.017021	down
TC10001187.hg.1	ZNF248	NM_021045	"Homo sapiens zinc finger protein 248 (ZNF248), transcript variant 1, mRNA."	RefSeq	1.93056	2.16642	-2.70778	-1.17761	0.015204	0.011282	down
TC03000369.hg.1	PDE12	NM_177966	"Homo sapiens phosphodiesterase 12 (PDE12), mRNA."	RefSeq	2.57194	2.80764	-2.54259	-1.17748	0.018113	0.011282	down
TC16000579.hg.1	SF3B3	NM_012426	"Homo sapiens splicing factor 3b, subunit 3, 130kDa (SF3B3), mRNA."	RefSeq	6.89466	7.13035	-3.07838	-1.17746	0.010684	0.007304	down
TC01000755.hg.1	SRSF11	NM_001190987	"Homo sapiens serine/arginine-rich splicing factor 11 (SRSF11), transcript variant 2, mRNA."	RefSeq	4.53864	4.77424	-2.35799	-1.17739	0.022027	0.017021	down
TC03003362.hg.1	PHLDB2	NM_001134438	"Homo sapiens pleckstrin homology-like domain, family B, member 2 (PHLDB2), transcript variant 1, mRNA."	RefSeq	2.39811	2.63317	-3.4989	-1.17695	0.007642	0.00432	down
TC17001885.hg.1	UNC13D	NM_199242	"Homo sapiens unc-13 homolog D (C. elegans) (UNC13D), mRNA."	RefSeq	4.46907	4.70402	-2.99	-1.17686	0.01162	0.007304	down
TC03000242.hg.1	KIF15	NM_020242	"Homo sapiens kinesin family member 15 (KIF15), mRNA."	RefSeq	1.83825	2.07282	-3.76023	-1.17656	0.006178	0.002462	down
TC06001074.hg.1	SASH1	NM_015278	"Homo sapiens SAM and SH3 domain containing 1 (SASH1), mRNA."	RefSeq	2.82298	3.05751	-4.40734	-1.17653	0.004026	0.001369	down
TC06004096.hg.1	SLC35A1	NM_001168398	"Homo sapiens solute carrier family 35 (CMP-sialic acid transporter), member A1 (SLC35A1), transcript variant 2, mRNA."	RefSeq	2.91798	3.15245	-2.87892	-1.17647	0.013001	0.007304	down
TC17000320.hg.1	TNFAIP1	NM_021137	"Homo sapiens tumor necrosis factor, alpha-induced protein 1 (endothelial) (TNFAIP1), mRNA."	RefSeq	4.98479	5.21919	-2.00886	-1.17642	0.035299	0.026443	down
TC08001433.hg.1	RAD54B	NM_001205262	"Homo sapiens RAD54 homolog B (S. cerevisiae) (RAD54B), transcript variant 2, mRNA."	RefSeq	2.25492	2.48926	-2.5687	-1.17637	0.017648	0.011282	down
TC01000776.hg.1	ACADM	NM_000016	"Homo sapiens acyl-CoA dehydrogenase, C-4 to C-12 straight chain (ACADM), nuclear gene encoding mitochondrial protein, transcript variant 1, mRNA."	RefSeq	3.3737	3.608	-3.39654	-1.17633	0.008323	0.00432	down
TC09000040.hg.1	KIAA1432	NM_001135920	"Homo sapiens KIAA1432 (KIAA1432), transcript variant 2, mRNA."	RefSeq	3.02521	3.25945	-2.39708	-1.17629	0.021136	0.017021	down
TC01003947.hg.1	NUP133	NM_018230	"Homo sapiens nucleoporin 133kDa (NUP133), mRNA."	RefSeq	3.28953	3.52358	-2.23232	-1.17613	0.025808	0.017021	down
TC12000012.hg.1	WNK1	BC130469	"Homo sapiens hereditary sensory neuropathy, type II, mRNA (cDNA clone MGC:163341 IMAGE:40146500), complete cds."	GenBank	3.39638	3.63012	-1.46276	-1.17588	0.084688	0.103127	down
TC08001745.hg.1	DGAT1	NM_012079	"Homo sapiens diacylglycerol O-acyltransferase 1 (DGAT1), mRNA."	RefSeq	5.16165	5.39536	-2.53662	-1.17586	0.018215	0.011282	down
TC10001398.hg.1	P4HA1	NM_000917	"Homo sapiens prolyl 4-hydroxylase, alpha polypeptide I (P4HA1), transcript variant 1, mRNA."	RefSeq	5.93499	6.1685	-2.30391	-1.1757	0.02353	0.017021	down
TC18000998.hg.1	SMAD4	NM_005359	"Homo sapiens SMAD family member 4 (SMAD4), mRNA."	RefSeq	5.43041	5.66393	-3.45534	-1.17569	0.007884	0.00432	down
TC01002553.hg.1	PPT1	NM_000310	"Homo sapiens palmitoyl-protein thioesterase 1 (PPT1), transcript variant 1, mRNA."	RefSeq	5.92666	6.16012	-3.6255	-1.17565	0.006941	0.002462	down
TC17001462.hg.1	TOP2A	NM_001067	"Homo sapiens topoisomerase (DNA) II alpha 170kDa (TOP2A), mRNA."	RefSeq	6.84338	7.07675	-1.84718	-1.17558	0.044994	0.042387	down
TC04000462.hg.1	CDS1	NM_001263	"Homo sapiens CDP-diacylglycerol synthase (phosphatidate cytidylyltransferase) 1 (CDS1), mRNA."	RefSeq	5.30017	5.53329	-2.15935	-1.17538	0.028673	0.026443	down
TC02000363.hg.1	MDH1	NM_001199111	"Homo sapiens malate dehydrogenase 1, NAD (soluble) (MDH1), transcript variant 1, mRNA."	RefSeq	3.23027	3.46317	-3.1579	-1.17519	0.010073	0.00432	down
TC02001621.hg.1	PUM2	NM_015317	"Homo sapiens pumilio homolog 2 (Drosophila) (PUM2), mRNA."	RefSeq	6.01051	6.24335	-2.61917	-1.17514	0.016655	0.011282	down
TC01001807.hg.1	LYPLAL1	NM_138794	"Homo sapiens lysophospholipase-like 1 (LYPLAL1), mRNA."	RefSeq	3.72019	3.95301	-2.68035	-1.17512	0.015586	0.011282	down
TC19001593.hg.1	PLAUR	NM_001005376	"Homo sapiens plasminogen activator, urokinase receptor (PLAUR), transcript variant 2, mRNA."	RefSeq	4.06394	4.29671	-0.866355	-1.17509	0.26901	0.326898	down
TC11002274.hg.1	RDX	NM_002906	"Homo sapiens radixin (RDX), transcript variant 3, mRNA."	RefSeq	4.9333	5.16607	-2.00394	-1.17509	0.035617	0.026443	down
TC10000345.hg.1	ASAH2B	NM_001079516	"Homo sapiens N-acylsphingosine amidohydrolase (non-lysosomal ceramidase) 2B (ASAH2B), mRNA."	RefSeq	1.87166	2.10439	-3.92852	-1.17506	0.00549	0.001624	down
TC10001667.hg.1	ZDHHC6	NM_022494	"Homo sapiens zinc finger, DHHC-type containing 6 (ZDHHC6), mRNA."	RefSeq	4.49373	4.72626	-4.63787	-1.1749	0.003428	0.001369	down
TC17001745.hg.1	SKA2	NM_182620	"Homo sapiens spindle and kinetochore associated complex subunit 2 (SKA2), transcript variant 1, mRNA."	RefSeq	5.20586	5.43816	-2.03998	-1.1747	0.033771	0.026443	down
TC0X000724.hg.1	MTMR1	NM_003828	"Homo sapiens myotubularin related protein 1 (MTMR1), mRNA."	RefSeq	2.51254	2.74476	-3.33284	-1.17464	0.008616	0.00432	down
TC0X001342.hg.1	THOC2	NM_001081550	"Homo sapiens THO complex 2 (THOC2), mRNA."	RefSeq	3.52356	3.7555	-1.44187	-1.17442	0.088043	0.103127	down
TC11002226.hg.1	TMEM123	NM_052932	"Homo sapiens transmembrane protein 123 (TMEM123), mRNA."	RefSeq	7.62945	7.86131	-3.31033	-1.17434	0.0088	0.00432	down
TC01000520.hg.1	CTPS1	NM_001905	"Homo sapiens CTP synthase 1 (CTPS1), mRNA."	RefSeq	3.72839	3.96005	-2.36811	-1.17418	0.021785	0.017021	down
TC08001423.hg.1	TRIQK	NM_001171795	"Homo sapiens triple QxxK/R motif containing (TRIQK), transcript variant 3, mRNA."	RefSeq	1.58496	1.81633	-5.39888	-1.17395	0.002187	0	down
TC01000898.hg.1	HIAT1	NM_033055	"Homo sapiens hippocampus abundant transcript 1 (HIAT1), mRNA."	RefSeq	6.09605	6.32729	-3.53086	-1.17384	0.007438	0.002462	down
TC14002194.hg.1	NOP9	NM_174913	"Homo sapiens NOP9 nucleolar protein (NOP9), mRNA."	RefSeq	2.18296	2.41413	-1.74328	-1.17378	0.052919	0.042387	down
TC12000099.hg.1	ENO2	NM_001975	"Homo sapiens enolase 2 (gamma, neuronal) (ENO2), mRNA."	RefSeq	3.47528	3.70637	-1.92395	-1.17372	0.03999	0.042387	down
TC12002087.hg.1	SBNO1	NM_018183	"Homo sapiens strawberry notch homolog 1 (Drosophila) (SBNO1), transcript variant 2, mRNA."	RefSeq	5.37875	5.60983	-1.81268	-1.17372	0.047476	0.042387	down
TC03000927.hg.1		ENST00000366261	cdna:novel chromosome:GRCh37:3:172034218:172039513:1 gene:ENSG00000203443 gene_biotype:protein_coding transcript_biotype:protein_coding	ENSEMBL	9.02512	9.25592	-3.34677	-1.17349	0.008546	0.00432	down
TC15000276.hg.1	PAK6	NM_001128628	"Homo sapiens p21 protein (Cdc42/Rac)-activated kinase 6 (PAK6), transcript variant 2, mRNA."	RefSeq	3.66506	3.89581	-2.76538	-1.17345	0.014561	0.011282	down
TC12001566.hg.1	CBX5	NM_001127321	"Homo sapiens chromobox homolog 5 (CBX5), transcript variant 2, mRNA."	RefSeq	5.85629	6.08694	-2.41811	-1.17336	0.020614	0.017021	down
TC07000722.hg.1	MET	NM_000245	"Homo sapiens met proto-oncogene (hepatocyte growth factor receptor) (MET), transcript variant 2, mRNA."	RefSeq	5.29913	5.5297	-3.08963	-1.1733	0.010608	0.007304	down
TC03000761.hg.1	RASA2	NM_006506	"Homo sapiens RAS p21 protein activator 2 (RASA2), mRNA."	RefSeq	2.08874	2.31926	-2.89477	-1.17326	0.012791	0.007304	down
TC01000645.hg.1	ZYG11B	NM_024646	"Homo sapiens zyg-11 family member B, cell cycle regulator (ZYG11B), mRNA."	RefSeq	4.88549	5.11597	-3.97242	-1.17323	0.005299	0.001624	down
TC11002076.hg.1	C2CD3	NM_015531	"Homo sapiens C2 calcium-dependent domain containing 3 (C2CD3), mRNA."	RefSeq	2.28517	2.51559	-3.42527	-1.17318	0.008132	0.00432	down
TC01002422.hg.1	DNAJC8	NM_014280	"Homo sapiens DnaJ (Hsp40) homolog, subfamily C, member 8 (DNAJC8), mRNA."	RefSeq	3.66221	3.89261	-2.08553	-1.17316	0.031531	0.026443	down
TC06002335.hg.1	PHF10	NM_018288	"Homo sapiens PHD finger protein 10 (PHF10), transcript variant 1, mRNA."	RefSeq	4.21654	4.44694	-1.9805	-1.17315	0.036808	0.026443	down
TC6_apd_hap1000038.hg.1	SAPCD1	NM_001039651	"Homo sapiens suppressor APC domain containing 1 (SAPCD1), mRNA."	RefSeq	2.82968	3.05978	-3.58236	-1.17292	0.00719	0.002462	down
TC12000679.hg.1	TMTC2	NM_152588	"Homo sapiens transmembrane and tetratricopeptide repeat containing 2 (TMTC2), mRNA."	RefSeq	1.59335	1.8234	-3.30437	-1.17288	0.008845	0.00432	down
TC03001227.hg.1	SGOL1	NM_001012409	"Homo sapiens shugoshin-like 1 (S. pombe) (SGOL1), transcript variant A1, mRNA."	RefSeq	3.97285	4.20282	-3.30045	-1.17281	0.008889	0.00432	down
TC15001474.hg.1	RFX7	NM_022841	"Homo sapiens regulatory factor X, 7 (RFX7), mRNA."	RefSeq	2.27461	2.50449	-1.5825	-1.17274	0.069023	0.064129	down
TC07001192.hg.1	FAM126A	NM_032581	"Homo sapiens family with sequence similarity 126, member A (FAM126A), mRNA."	RefSeq	1.59525	1.825	-2.79574	-1.17264	0.014147	0.011282	down
TC10000049.hg.1	FAM208B	NM_017782	"Homo sapiens family with sequence similarity 208, member B (FAM208B), mRNA."	RefSeq	4.66777	4.89744	-1.58816	-1.17257	0.068253	0.064129	down
TC03000507.hg.1	NIT2	NM_020202	"Homo sapiens nitrilase family, member 2 (NIT2), mRNA."	RefSeq	3.74925	3.97882	-1.63502	-1.17248	0.062944	0.064129	down
TC19000406.hg.1	ZNF254	NM_203282	"Homo sapiens zinc finger protein 254 (ZNF254), mRNA."	RefSeq	2.80296	3.03237	-3.07382	-1.17236	0.010735	0.007304	down
TC09001539.hg.1	PSMD5	NM_005047	"Homo sapiens proteasome (prosome, macropain) 26S subunit, non-ATPase, 5 (PSMD5), transcript variant 1, mRNA."	RefSeq	5.82085	6.05015	-2.47385	-1.17227	0.019532	0.017021	down
TC17000484.hg.1	GSDMA	NM_178171	"Homo sapiens gasdermin A (GSDMA), mRNA."	RefSeq	2.75077	2.97986	-2.07358	-1.17209	0.032116	0.026443	down
TC03000585.hg.1	ZDHHC23	NM_173570	"Homo sapiens zinc finger, DHHC-type containing 23 (ZDHHC23), mRNA."	RefSeq	2.55368	2.78273	-3.77761	-1.17206	0.006101	0.002462	down
TC10000801.hg.1	DUSP5	NM_004419	"Homo sapiens dual specificity phosphatase 5 (DUSP5), mRNA."	RefSeq	5.20149	5.42996	-0.692227	-1.17159	0.374421	0.345978	down
TC02004925.hg.1	TIA1	NM_022037	"Homo sapiens TIA1 cytotoxic granule-associated RNA binding protein (TIA1), transcript variant 1, mRNA."	RefSeq	3.86009	4.08831	-2.25305	-1.17139	0.025172	0.017021	down
TC12003229.hg.1	RHNO1	NM_001252499	"Homo sapiens RAD9-HUS1-RAD1 interacting nuclear orphan 1 (RHNO1), transcript variant 1, mRNA."	RefSeq	4.86203	5.09015	-2.59978	-1.17131	0.017018	0.011282	down
TC04001615.hg.1	ZNF827	NM_178835	"Homo sapiens zinc finger protein 827 (ZNF827), mRNA."	RefSeq	2.03306	2.26112	-3.08392	-1.17125	0.010646	0.007304	down
TC11000187.hg.1	CTR9	NM_014633	"Homo sapiens Ctr9, Paf1/RNA polymerase II complex component, homolog (S. cerevisiae) (CTR9), mRNA."	RefSeq	3.85894	4.08692	-2.66998	-1.1712	0.015802	0.011282	down
TC15002769.hg.1	CHD2	NM_001042572	"Homo sapiens chromodomain helicase DNA binding protein 2 (CHD2), transcript variant 2, mRNA."	RefSeq	4.46608	4.694	-2.19581	-1.17114	0.027349	0.026443	down
TC02004997.hg.1	LIMS3L	NM_001205288	"Homo sapiens LIM and senescent cell antigen-like domains 3-like (LIMS3L), transcript variant 1, mRNA."	RefSeq	3.9035	4.13124	-4.61967	-1.17099	0.003466	0.001369	down
TC07000278.hg.1	PPIA	NM_021130	"Homo sapiens peptidylprolyl isomerase A (cyclophilin A) (PPIA), mRNA."	RefSeq	4.28718	4.51482	-3.0139	-1.17092	0.011346	0.007304	down
TC06000276.hg.1	ZKSCAN8	NM_006298	"Homo sapiens zinc finger with KRAB and SCAN domains 8 (ZKSCAN8), mRNA."	RefSeq	2.6695	2.89707	-2.12782	-1.17086	0.029825	0.026443	down
TC14000538.hg.1	TTC8	NM_144596	"Homo sapiens tetratricopeptide repeat domain 8 (TTC8), transcript variant 1, mRNA."	RefSeq	3.00368	3.23123	-2.79544	-1.17085	0.014153	0.011282	down
TC10002930.hg.1	ERLIN1	NM_001100626	"Homo sapiens ER lipid raft associated 1 (ERLIN1), mRNA."	RefSeq	4.82414	5.05151	-2.45347	-1.1707	0.019914	0.017021	down
TC15000306.hg.1	NUSAP1	NM_001243143	"Homo sapiens nucleolar and spindle associated protein 1 (NUSAP1), transcript variant 5, mRNA."	RefSeq	6.16086	6.38822	-2.18797	-1.17068	0.027654	0.026443	down
TC03000327.hg.1	GPR62	NM_080865	"Homo sapiens G protein-coupled receptor 62 (GPR62), mRNA."	RefSeq	2.40474	2.63193	-1.57248	-1.17055	0.070201	0.064129	down
TC18000205.hg.1	MALT1	NM_006785	"Homo sapiens mucosa associated lymphoid tissue lymphoma translocation gene 1 (MALT1), transcript variant 1, mRNA."	RefSeq	4.31754	4.54463	-1.69305	-1.17047	0.057158	0.064129	down
TC14002304.hg.1	TTLL5	NM_015072	"Homo sapiens tubulin tyrosine ligase-like family, member 5 (TTLL5), mRNA."	RefSeq	4.06509	4.29208	-2.44633	-1.17039	0.020048	0.017021	down
TC07000547.hg.1	ANKIB1	NM_019004	"Homo sapiens ankyrin repeat and IBR domain containing 1 (ANKIB1), mRNA."	RefSeq	5.16048	5.38736	-2.08946	-1.1703	0.031365	0.026443	down
TC01001727.hg.1	MAPKAPK2	NM_004759	"Homo sapiens mitogen-activated protein kinase-activated protein kinase 2 (MAPKAPK2), transcript variant 1, mRNA."	RefSeq	4.49234	4.71916	-3.33968	-1.17026	0.008565	0.00432	down
TC14000351.hg.1	KIAA0586	NM_001244189	"Homo sapiens KIAA0586 (KIAA0586), transcript variant 1, mRNA."	RefSeq	2.36803	2.59481	-2.0048	-1.17022	0.035554	0.026443	down
TC17000672.hg.1	ABCC3	NM_003786	"Homo sapiens ATP-binding cassette, sub-family C (CFTR/MRP), member 3 (ABCC3), transcript variant 1, mRNA."	RefSeq	4.77616	5.00288	-2.27546	-1.17017	0.024459	0.017021	down
TC07001930.hg.1	KIAA1147	NM_001080392	"Homo sapiens KIAA1147 (KIAA1147), mRNA."	RefSeq	3.5165	3.7431	-2.45417	-1.17007	0.019895	0.017021	down
TC11001389.hg.1	ST5	NM_005418	"Homo sapiens suppression of tumorigenicity 5 (ST5), transcript variant 1, mRNA."	RefSeq	3.29065	3.51711	-3.57767	-1.16996	0.007209	0.002462	down
TC07000090.hg.1	PHF14	NM_014660	"Homo sapiens PHD finger protein 14 (PHF14), transcript variant 2, mRNA."	RefSeq	1.65166	1.87798	-2.59763	-1.16984	0.017069	0.011282	down
TC01002684.hg.1		ENST00000536061	cdna:known chromosome:GRCh37:1:54635333:54637997:-1 gene:ENSG00000248835 gene_biotype:protein_coding transcript_biotype:protein_coding	ENSEMBL	2.15538	2.38147	-1.21606	-1.16966	0.134758	0.178875	down
TC06002186.hg.1	ADAT2	NM_182503	"Homo sapiens adenosine deaminase, tRNA-specific 2 (ADAT2), mRNA."	RefSeq	1.91706	2.143	-3.18933	-1.16954	0.00985	0.00432	down
TC10001416.hg.1	AGAP5	NM_001144000	"Homo sapiens ArfGAP with GTPase domain, ankyrin repeat and PH domain 5 (AGAP5), mRNA."	RefSeq	4.61393	4.83981	-2.59057	-1.1695	0.017279	0.011282	down
TC0X000909.hg.1	EIF1AX	NM_001412	"Homo sapiens eukaryotic translation initiation factor 1A, X-linked (EIF1AX), mRNA."	RefSeq	6.48166	6.70747	-1.81398	-1.16944	0.047393	0.042387	down
TC01002829.hg.1	DDAH1	NM_001134445	"Homo sapiens dimethylarginine dimethylaminohydrolase 1 (DDAH1), transcript variant 2, mRNA."	RefSeq	2.75496	2.98075	-3.86482	-1.16941	0.005738	0.002462	down
TC0X000526.hg.1	PRPS1	NM_001204402	"Homo sapiens phosphoribosyl pyrophosphate synthetase 1 (PRPS1), transcript variant 2, mRNA."	RefSeq	2.77316	2.9987	-5.09772	-1.16921	0.002626	0.001369	down
TC15001110.hg.1	TJP1	NM_003257	"Homo sapiens tight junction protein 1 (TJP1), transcript variant 1, mRNA."	RefSeq	6.36419	6.58959	-1.76344	-1.1691	0.051276	0.042387	down
TC19001261.hg.1	CYP4F2	NM_001082	"Homo sapiens cytochrome P450, family 4, subfamily F, polypeptide 2 (CYP4F2), mRNA."	RefSeq	1.61647	1.84178	-3.88707	-1.16903	0.00563	0.001624	down
TC03001661.hg.1	SPICE1	NM_144718	"Homo sapiens spindle and centriole associated protein 1 (SPICE1), mRNA."	RefSeq	2.58375	2.80902	-2.8791	-1.169	0.012995	0.007304	down
TC01003627.hg.1	TRMT1L	NM_001202423	"Homo sapiens tRNA methyltransferase 1 homolog (S. cerevisiae)-like (TRMT1L), transcript variant 2, mRNA."	RefSeq	3.768	3.9932	-2.4993	-1.16894	0.018972	0.017021	down
TC04000074.hg.1	KIAA0232	NM_001100590	"Homo sapiens KIAA0232 (KIAA0232), transcript variant 2, mRNA."	RefSeq	3.27507	3.50009	-1.93559	-1.1688	0.039239	0.042387	down
TC03001370.hg.1	SMARCC1	NM_003074	"Homo sapiens SWI/SNF related, matrix associated, actin dependent regulator of chromatin, subfamily c, member 1 (SMARCC1), mRNA."	RefSeq	5.45707	5.68209	-2.9543	-1.16879	0.011983	0.007304	down
TC05001579.hg.1	MEF2C	NM_001131005	"Homo sapiens myocyte enhancer factor 2C (MEF2C), transcript variant 2, mRNA."	RefSeq	2.16994	2.3949	-3.99295	-1.16875	0.005223	0.001624	down
TC17001029.hg.1	CXCL16	NM_022059	"Homo sapiens chemokine (C-X-C motif) ligand 16 (CXCL16), transcript variant 1, mRNA."	RefSeq	5.26739	5.49184	-2.31964	-1.16833	0.023039	0.017021	down
TC02000660.hg.1	RGPD4	NM_182588	"Homo sapiens RANBP2-like and GRIP domain containing 4 (RGPD4), mRNA."	RefSeq	5.16872	5.39304	-1.6892	-1.16823	0.057482	0.064129	down
TC19002666.hg.1	ZNF587	NM_001204817	"Homo sapiens zinc finger protein 587 (ZNF587), transcript variant 2, mRNA."	RefSeq	4.42947	4.65349	-3.96769	-1.16799	0.005325	0.001624	down
TC13000758.hg.1	RBM26	NM_022118	"Homo sapiens RNA binding motif protein 26 (RBM26), mRNA."	RefSeq	4.66153	4.8854	-2.29429	-1.16786	0.023803	0.017021	down
TC10000312.hg.1	AGAP9	NM_001190810	"Homo sapiens ArfGAP with GTPase domain, ankyrin repeat and PH domain 9 (AGAP9), mRNA."	RefSeq	4.582	4.80587	-2.21204	-1.16786	0.02654	0.026443	down
TC05000209.hg.1	PARP8	NM_024615	"Homo sapiens poly (ADP-ribose) polymerase family, member 8 (PARP8), transcript variant 2, mRNA."	RefSeq	2.8279	3.05176	-3.81975	-1.16786	0.005904	0.002462	down
TC10000469.hg.1	FUT11	NM_173540	"Homo sapiens fucosyltransferase 11 (alpha (1,3) fucosyltransferase) (FUT11), mRNA."	RefSeq	3.12337	3.34715	-1.97961	-1.16779	0.03684	0.026443	down
TC08000135.hg.1	PCM1	NM_006197	"Homo sapiens pericentriolar material 1 (PCM1), mRNA."	RefSeq	4.35309	4.57681	-1.4886	-1.16774	0.08092	0.064129	down
TC6_ssto_hap7000064.hg.1	SAPCD1	NM_001039651	"Homo sapiens suppressor APC domain containing 1 (SAPCD1), mRNA."	RefSeq	3.02977	3.25309	-3.44672	-1.16741	0.007966	0.00432	down
TC22000046.hg.1	CDC45	NM_001178010	"Homo sapiens cell division cycle 45 (CDC45), transcript variant 1, mRNA."	RefSeq	3.60986	3.83305	-4.57639	-1.16732	0.003619	0.001369	down
TC07001236.hg.1	CPVL	NM_019029	"Homo sapiens carboxypeptidase, vitellogenic-like (CPVL), transcript variant 2, mRNA."	RefSeq	2.53979	2.76294	-3.95018	-1.16728	0.005407	0.001624	down
TC02001911.hg.1	PELI1	NM_020651	"Homo sapiens pellino E3 ubiquitin protein ligase 1 (PELI1), mRNA."	RefSeq	4.14694	4.37009	-3.85563	-1.16727	0.005783	0.002462	down
TC09000140.hg.1	NFX1	NM_002504	"Homo sapiens nuclear transcription factor, X-box binding 1 (NFX1), transcript variant 1, mRNA."	RefSeq	4.45365	4.67645	-1.95631	-1.167	0.038068	0.026443	down
TC01000883.hg.1	PTBP2	NM_021190	"Homo sapiens polypyrimidine tract binding protein 2 (PTBP2), mRNA."	RefSeq	2.17172	2.39446	-2.87009	-1.16695	0.013109	0.007304	down
TC12003243.hg.1	ERBB3	NM_001005915	"Homo sapiens v-erb-b2 erythroblastic leukemia viral oncogene homolog 3 (avian) (ERBB3), transcript variant s, mRNA."	RefSeq	5.12423	5.34694	-1.93557	-1.16693	0.039246	0.042387	down
TC06000146.hg.1	ALDH5A1	NM_001080	"Homo sapiens aldehyde dehydrogenase 5 family, member A1 (ALDH5A1), nuclear gene encoding mitochondrial protein, transcript variant 2, mRNA."	RefSeq	2.99838	3.22048	-3.59304	-1.16643	0.007145	0.002462	down
TC06001370.hg.1	ZNF322	NM_001242797	"Homo sapiens zinc finger protein 322 (ZNF322), transcript variant 1, mRNA."	RefSeq	2.09082	2.31285	-2.9295	-1.16637	0.012276	0.007304	down
TC02002620.hg.1	TMEM194B	NM_001142645	"Homo sapiens transmembrane protein 194B (TMEM194B), mRNA."	RefSeq	2.3282	2.55019	-2.55527	-1.16634	0.017896	0.011282	down
TC16000876.hg.1		ENST00000399147	cdna:putative chromosome:GRCh37:16:12021230:12035902:-1 gene:ENSG00000234719 gene_biotype:protein_coding transcript_biotype:protein_coding	ENSEMBL	6.34003	6.56191	-2.50282	-1.16626	0.018877	0.011282	down
TC04001609.hg.1	OTUD4	NM_001102653	"Homo sapiens OTU domain containing 4 (OTUD4), transcript variant 3, mRNA."	RefSeq	3.9617	4.18358	-2.5155	-1.16625	0.018628	0.011282	down
TC02000996.hg.1	CERS6	NM_001256126	"Homo sapiens ceramide synthase 6 (CERS6), transcript variant 1, mRNA."	RefSeq	5.47213	5.69396	-2.14731	-1.16621	0.02908	0.026443	down
TC09000354.hg.1	VPS13A	NM_001018037	"Homo sapiens vacuolar protein sorting 13 homolog A (S. cerevisiae) (VPS13A), transcript variant C, mRNA."	RefSeq	2.34397	2.5658	-1.60068	-1.16621	0.066719	0.064129	down
TC01002660.hg.1	SELRC1	NM_023077	"Homo sapiens Sel1 repeat containing 1 (SELRC1), mRNA."	RefSeq	2.50386	2.72568	-1.87365	-1.16621	0.043014	0.042387	down
TC15002792.hg.1	GANC	NM_198141	"Homo sapiens glucosidase, alpha; neutral C (GANC), mRNA."	RefSeq	2.11948	2.34125	-2.15617	-1.16616	0.028819	0.026443	down
TC14000248.hg.1	PNN	NM_002687	"Homo sapiens pinin, desmosome associated protein (PNN), mRNA."	RefSeq	4.62652	4.84826	-2.48963	-1.16614	0.019182	0.017021	down
TC12001597.hg.1	SMARCC2	NM_001130420	"Homo sapiens SWI/SNF related, matrix associated, actin dependent regulator of chromatin, subfamily c, member 2 (SMARCC2), transcript variant 3, mRNA."	RefSeq	5.52458	5.74592	-2.79912	-1.16581	0.014109	0.011282	down
TC07001715.hg.1	NAPEPLD	NM_001122838	"Homo sapiens N-acyl phosphatidylethanolamine phospholipase D (NAPEPLD), transcript variant 1, mRNA."	RefSeq	1.60006	1.82104	-3.4117	-1.16552	0.008221	0.00432	down
TC05003396.hg.1	KIF2A	NM_001098511	"Homo sapiens kinesin heavy chain member 2A (KIF2A), transcript variant 2, mRNA."	RefSeq	5.05592	5.27682	-2.70722	-1.16546	0.01521	0.011282	down
TC04000853.hg.1	GALNT7	NM_017423	"Homo sapiens UDP-N-acetyl-alpha-D-galactosamine:polypeptide N-acetylgalactosaminyltransferase 7 (GalNAc-T7) (GALNT7), mRNA."	RefSeq	4.50858	4.7294	-2.58002	-1.16539	0.017406	0.011282	down
TC01002759.hg.1	SERBP1	NM_001018067	"Homo sapiens SERPINE1 mRNA binding protein 1 (SERBP1), transcript variant 1, mRNA."	RefSeq	7.26357	7.48433	-2.20322	-1.16535	0.026948	0.026443	down
TC10000832.hg.1	VWA2	NM_198496	"[retired] Homo sapiens von Willebrand factor A domain containing 2 (VWA2), mRNA."	RefSeq	2.27038	2.49105	-3.74004	-1.16528	0.006292	0.002462	down
TC07001509.hg.1	RFC2	NM_002914	"Homo sapiens replication factor C (activator 1) 2, 40kDa (RFC2), transcript variant 2, mRNA."	RefSeq	4.35391	4.57458	-2.6925	-1.16527	0.015407	0.011282	down
TC11002049.hg.1	NUMA1	NM_006185	"Homo sapiens nuclear mitotic apparatus protein 1 (NUMA1), mRNA."	RefSeq	4.33176	4.55227	-2.42894	-1.16514	0.020353	0.017021	down
TC19000659.hg.1	IGFL2	NM_001002915	"Homo sapiens IGF-like family member 2 (IGFL2), transcript variant 1, mRNA."	RefSeq	2.27928	2.49962	-1.03031	-1.16501	0.193803	0.270995	down
TC12001426.hg.1	SLC38A1	NM_001077484	"Homo sapiens solute carrier family 38, member 1 (SLC38A1), transcript variant 2, mRNA."	RefSeq	7.45059	7.67065	-1.56416	-1.16477	0.071232	0.064129	down
TC04001332.hg.1	HNRNPD	NM_001003810	"Homo sapiens heterogeneous nuclear ribonucleoprotein D (AU-rich element RNA binding protein 1, 37kDa) (HNRNPD), transcript variant 4, mRNA."	RefSeq	4.60691	4.82672	-2.91253	-1.16458	0.012505	0.007304	down
TC15001161.hg.1	MTMR10	NM_017762	"Homo sapiens myotubularin related protein 10 (MTMR10), mRNA."	RefSeq	2.89561	3.11538	-2.62462	-1.16454	0.016547	0.011282	down
TC6_mann_hap4000108.hg.1	RNF39	NM_025236	"Homo sapiens ring finger protein 39 (RNF39), transcript variant 1, mRNA."	RefSeq	3.26723	3.48699	-1.5071	-1.16454	0.078291	0.064129	down
TC12000028.hg.1	FKBP4	NM_002014	"Homo sapiens FK506 binding protein 4, 59kDa (FKBP4), mRNA."	RefSeq	4.74867	4.96823	-2.16457	-1.16438	0.028463	0.026443	down
TC06000883.hg.1	AMD1	NM_001033059	"Homo sapiens adenosylmethionine decarboxylase 1 (AMD1), transcript variant 2, mRNA."	RefSeq	6.05463	6.27386	-2.49336	-1.16412	0.019099	0.017021	down
TC11002126.hg.1	RSF1	NM_016578	"Homo sapiens remodeling and spacing factor 1 (RSF1), mRNA."	RefSeq	3.6284	3.8476	-1.91767	-1.16409	0.040385	0.042387	down
TC09001585.hg.1	SCAI	NM_001144877	"Homo sapiens suppressor of cancer cell invasion (SCAI), transcript variant 2, mRNA."	RefSeq	2.30475	2.52384	-2.47929	-1.164	0.019392	0.017021	down
TC0X000308.hg.1	FAM156B	NM_001099684	"Homo sapiens family with sequence similarity 156, member B (FAM156B), mRNA."	RefSeq	2.67034	2.88914	-3.38121	-1.16376	0.00838	0.00432	down
TC12001412.hg.1	PUS7L	NM_001098614	"Homo sapiens pseudouridylate synthase 7 homolog (S. cerevisiae)-like (PUS7L), transcript variant 2, mRNA."	RefSeq	1.88827	2.10688	-2.62814	-1.16361	0.01647	0.011282	down
TC04000174.hg.1	PI4K2B	NM_018323	"Homo sapiens phosphatidylinositol 4-kinase type 2 beta (PI4K2B), mRNA."	RefSeq	3.55965	3.77801	-2.15835	-1.1634	0.02873	0.026443	down
TC12000082.hg.1	NCAPD2	NM_014865	"Homo sapiens non-SMC condensin I complex, subunit D2 (NCAPD2), mRNA."	RefSeq	6.6447	6.86306	-3.08075	-1.1634	0.010665	0.007304	down
TC17000681.hg.1	UTP18	NM_016001	"Homo sapiens UTP18 small subunit (SSU) processome component homolog (yeast) (UTP18), mRNA."	RefSeq	2.53775	2.75598	-2.40142	-1.16331	0.021028	0.017021	down
TC14000463.hg.1	YLPM1	NM_019589	"Homo sapiens YLP motif containing 1 (YLPM1), mRNA."	RefSeq	2.72255	2.9403	-2.87061	-1.16292	0.01309	0.007304	down
TC06001830.hg.1	RAB23	NM_016277	"Homo sapiens RAB23, member RAS oncogene family (RAB23), transcript variant 1, mRNA."	RefSeq	3.59712	3.81486	-1.59506	-1.16291	0.067482	0.064129	down
TC15000272.hg.1	EIF2AK4	NM_001013703	"Homo sapiens eukaryotic translation initiation factor 2 alpha kinase 4 (EIF2AK4), mRNA."	RefSeq	4.54574	4.76348	-2.25981	-1.16291	0.024987	0.017021	down
TC19001488.hg.1	ZNF607	NM_032689	"Homo sapiens zinc finger protein 607 (ZNF607), transcript variant 1, mRNA."	RefSeq	2.50005	2.71773	-2.34443	-1.16286	0.022346	0.017021	down
TC19001350.hg.1	ZNF708	NM_021269	"Homo sapiens zinc finger protein 708 (ZNF708), mRNA."	RefSeq	1.91611	2.13366	-1.39402	-1.16276	0.096012	0.103127	down
TC07000228.hg.1	2017-09-07	NM_001011553	"Homo sapiens septin 7 (SEPT7), transcript variant 2, mRNA."	RefSeq	3.04141	3.25849	-2.52763	-1.16237	0.018437	0.011282	down
TC04000683.hg.1	NAA15	NM_057175	"Homo sapiens N(alpha)-acetyltransferase 15, NatA auxiliary subunit (NAA15), mRNA."	RefSeq	3.73167	3.94874	-1.88112	-1.16237	0.042518	0.042387	down
TC03002078.hg.1	LIPH	NM_139248	"Homo sapiens lipase, member H (LIPH), mRNA."	RefSeq	5.79477	6.01157	-2.91964	-1.16215	0.012397	0.007304	down
TC19001600.hg.1	ZNF45	NM_003425	"Homo sapiens zinc finger protein 45 (ZNF45), mRNA."	RefSeq	1.773	1.98962	-3.33964	-1.16201	0.008571	0.00432	down
TC15000232.hg.1	PGBD4	NM_152595	"Homo sapiens piggyBac transposable element derived 4 (PGBD4), mRNA."	RefSeq	1.59099	1.80738	-5.74272	-1.16182	0.001766	0	down
TC05000354.hg.1	UTP15	NM_032175	"Homo sapiens UTP15, U3 small nucleolar ribonucleoprotein, homolog (S. cerevisiae) (UTP15), mRNA."	RefSeq	2.87971	3.09601	-1.62147	-1.16175	0.064389	0.064129	down
TC17001612.hg.1	ARL17B	NM_001039083	"Homo sapiens ADP-ribosylation factor-like 17B (ARL17B), transcript variant 1, mRNA."	RefSeq	2.96785	3.18414	-3.071	-1.16174	0.010761	0.007304	down
TC04001637.hg.1	SH3D19	NM_001009555	"Homo sapiens SH3 domain containing 19 (SH3D19), transcript variant 1, mRNA."	RefSeq	3.99312	4.20921	-2.4406	-1.16158	0.020137	0.017021	down
TC06001668.hg.1	SRPK1	NM_003137	"Homo sapiens SRSF protein kinase 1 (SRPK1), transcript variant 1, mRNA."	RefSeq	4.71746	4.93354	-3.00548	-1.16158	0.011429	0.007304	down
TC02000286.hg.1	SOCS5	NM_014011	"Homo sapiens suppressor of cytokine signaling 5 (SOCS5), transcript variant 1, mRNA."	RefSeq	2.40096	2.61704	-2.59952	-1.16157	0.017024	0.011282	down
TC01000990.hg.1	CAPZA1	NM_006135	"Homo sapiens capping protein (actin filament) muscle Z-line, alpha 1 (CAPZA1), mRNA."	RefSeq	6.38056	6.59638	-2.60286	-1.16137	0.016941	0.011282	down
TC09000510.hg.1	INVS	NM_014425	"Homo sapiens inversin (INVS), transcript variant 1, mRNA."	RefSeq	3.19907	3.41469	-1.62587	-1.16121	0.063937	0.064129	down
TC18000220.hg.1	KIAA1468	NM_020854	"Homo sapiens KIAA1468 (KIAA1468), mRNA."	RefSeq	3.80515	4.02033	-1.60822	-1.16085	0.065929	0.064129	down
TC03001850.hg.1	GK5	NM_001039547	"Homo sapiens glycerol kinase 5 (putative) (GK5), transcript variant 1, mRNA."	RefSeq	2.20353	2.41865	-2.90567	-1.1608	0.012626	0.007304	down
TC21000097.hg.1	BACH1	NM_206866	"Homo sapiens BTB and CNC homology 1, basic leucine zipper transcription factor 1 (BACH1), transcript variant 1, mRNA."	RefSeq	3.04182	3.25685	-3.12166	-1.16073	0.010334	0.007304	down
TC04000897.hg.1	CCDC111	NM_152683	"Homo sapiens coiled-coil domain containing 111 (CCDC111), mRNA."	RefSeq	2.08895	2.30396	-2.7855	-1.16071	0.014268	0.011282	down
TC17001012.hg.1	C17orf85	NM_001114118	"Homo sapiens chromosome 17 open reading frame 85 (C17orf85), mRNA."	RefSeq	4.07538	4.29017	-2.10729	-1.16054	0.030551	0.026443	down
TC13000733.hg.1	KLF12	NM_007249	"Homo sapiens Kruppel-like factor 12 (KLF12), mRNA."	RefSeq	2.65218	2.86693	-2.28912	-1.16051	0.023994	0.017021	down
TC12001747.hg.1	KRR1	NM_007043	"Homo sapiens KRR1, small subunit (SSU) processome component, homolog (yeast) (KRR1), mRNA."	RefSeq	4.30502	4.51977	-1.81035	-1.16051	0.047686	0.042387	down
TC15002009.hg.1	PCSK6	NM_002570	"Homo sapiens proprotein convertase subtilisin/kexin type 6 (PCSK6), transcript variant 1, mRNA."	RefSeq	3.49715	3.7118	-3.20903	-1.16042	0.009628	0.00432	down
TC15000445.hg.1	FAM63B	NM_001040450	"Homo sapiens family with sequence similarity 63, member B (FAM63B), transcript variant 1, mRNA."	RefSeq	2.96987	3.1842	-1.1884	-1.16017	0.141817	0.178875	down
TC01000454.hg.1	ZMYM1	NM_024772	"Homo sapiens zinc finger, MYM-type 1 (ZMYM1), mRNA."	RefSeq	3.4215	3.63579	-2.1587	-1.16013	0.028705	0.026443	down
TC12000958.hg.1	RNF34	NM_025126	"Homo sapiens ring finger protein 34, E3 ubiquitin protein ligase (RNF34), transcript variant 2, mRNA."	RefSeq	4.15205	4.36629	-3.36221	-1.16009	0.008456	0.00432	down
TC05000726.hg.1	EIF4EBP3	NM_003732	"Homo sapiens eukaryotic translation initiation factor 4E binding protein 3 (EIF4EBP3), mRNA."	RefSeq	4.54238	4.7566	-2.14918	-1.16008	0.029042	0.026443	down
TC18000145.hg.1	GALNT1	NM_020474	"Homo sapiens UDP-N-acetyl-alpha-D-galactosamine:polypeptide N-acetylgalactosaminyltransferase 1 (GalNAc-T1) (GALNT1), mRNA."	RefSeq	5.4599	5.67389	-1.66174	-1.1599	0.060118	0.064129	down
TC12000587.hg.1	HMGA2	NM_003484	"Homo sapiens high mobility group AT-hook 2 (HMGA2), transcript variant 2, mRNA."	RefSeq	1.96617	2.18012	-3.50716	-1.15986	0.007572	0.002462	down
TC11003476.hg.1	PIK3C2A	NM_002645	"Homo sapiens phosphatidylinositol-4-phosphate 3-kinase, catalytic subunit type 2 alpha (PIK3C2A), mRNA."	RefSeq	5.47752	5.69136	-1.36451	-1.15977	0.101404	0.103127	down
TC12000581.hg.1	LEMD3	NM_001167614	"Homo sapiens LEM domain containing 3 (LEMD3), transcript variant 2, mRNA."	RefSeq	4.27556	4.48921	-1.73096	-1.15962	0.053975	0.042387	down
TC19001103.hg.1	C3	NM_000064	"Homo sapiens complement component 3 (C3), mRNA."	RefSeq	2.45349	2.66706	-3.53486	-1.15955	0.007393	0.002462	down
TC15000338.hg.1	CASC4	NM_138423	"Homo sapiens cancer susceptibility candidate 4 (CASC4), transcript variant 1, mRNA."	RefSeq	6.28191	6.49541	-2.46979	-1.1595	0.019609	0.017021	down
TC10001240.hg.1	AGAP9	NM_001190810	"Homo sapiens ArfGAP with GTPase domain, ankyrin repeat and PH domain 9 (AGAP9), mRNA."	RefSeq	4.44263	4.65602	-2.23655	-1.15941	0.025694	0.017021	down
TC02000089.hg.1	DDX1	NM_004939	"Homo sapiens DEAD (Asp-Glu-Ala-Asp) box helicase 1 (DDX1), mRNA."	RefSeq	6.10649	6.31985	-1.87216	-1.15938	0.043141	0.042387	down
TC22000199.hg.1	NF2	NM_000268	"Homo sapiens neurofibromin 2 (merlin) (NF2), transcript variant 1, mRNA."	RefSeq	4.99691	5.21026	-2.22087	-1.15938	0.026184	0.017021	down
TC06000617.hg.1	CDC5L	NM_001253	"Homo sapiens cell division cycle 5-like (CDC5L), mRNA."	RefSeq	5.4954	5.70872	-2.11437	-1.15935	0.03029	0.026443	down
TC12002153.hg.1	POLE	NM_006231	"Homo sapiens polymerase (DNA directed), epsilon, catalytic subunit (POLE), mRNA."	RefSeq	3.30063	3.51386	-3.95288	-1.15928	0.005395	0.001624	down
TC02002523.hg.1	SLC25A12	NM_003705	"Homo sapiens solute carrier family 25 (aspartate/glutamate carrier), member 12 (SLC25A12), nuclear gene encoding mitochondrial protein, transcript variant 1, mRNA."	RefSeq	2.52817	2.74139	-2.94779	-1.15928	0.012085	0.007304	down
TC02002507.hg.1	SPC25	NM_020675	"Homo sapiens SPC25, NDC80 kinetochore complex component, homolog (S. cerevisiae) (SPC25), mRNA."	RefSeq	2.2395	2.45252	-2.04937	-1.15911	0.033186	0.026443	down
TC08001325.hg.1	SBSPON	NM_153225	"Homo sapiens somatomedin B and thrombospondin, type 1 domain containing (SBSPON), mRNA."	RefSeq	5.18695	5.39971	-1.95921	-1.1589	0.037896	0.026443	down
TC02000528.hg.1	RGPD1	NM_001024457	"Homo sapiens RANBP2-like and GRIP domain containing 1 (RGPD1), mRNA."	RefSeq	4.74457	4.95727	-1.84122	-1.15886	0.045484	0.042387	down
TC05001706.hg.1	DTWD2	NM_173666	"Homo sapiens DTW domain containing 2 (DTWD2), mRNA."	RefSeq	3.29244	3.50511	-1.89541	-1.15883	0.041671	0.042387	down
TC07003310.hg.1	UPK3B	NM_030570	"Homo sapiens uroplakin 3B (UPK3B), transcript variant 1, mRNA."	RefSeq	3.72284	3.93532	-2.56872	-1.15867	0.017642	0.011282	down
TC17001601.hg.1	PLEKHM1	NM_014798	"Homo sapiens pleckstrin homology domain containing, family M (with RUN domain) member 1 (PLEKHM1), transcript variant 1, mRNA."	RefSeq	5.58606	5.7985	-2.27578	-1.15865	0.02444	0.017021	down
TC05001628.hg.1	CHD1	NM_001270	"Homo sapiens chromodomain helicase DNA binding protein 1 (CHD1), mRNA."	RefSeq	3.91573	4.12813	-1.30982	-1.15861	0.11246	0.103127	down
TC6_mcf_hap5000094.hg.1	PFDN6	NM_001185181	"Homo sapiens prefoldin subunit 6 (PFDN6), transcript variant 1, mRNA."	RefSeq	1.88484	2.09712	-1.66226	-1.15852	0.060067	0.064129	down
TC09001366.hg.1	PTCH1	NM_000264	"Homo sapiens patched 1 (PTCH1), transcript variant 1b, mRNA."	RefSeq	3.94037	4.15262	-3.59471	-1.1585	0.007132	0.002462	down
TC16001278.hg.1	CFDP1	NM_006324	"Homo sapiens craniofacial development protein 1 (CFDP1), mRNA."	RefSeq	3.21354	3.42545	-2.94141	-1.15822	0.012142	0.007304	down
TC14000406.hg.1	EIF2S1	NM_004094	"Homo sapiens eukaryotic translation initiation factor 2, subunit 1 alpha, 35kDa (EIF2S1), mRNA."	RefSeq	4.68111	4.89295	-2.16194	-1.15816	0.028546	0.026443	down
TC02000233.hg.1	GPATCH11	NM_174931	"Homo sapiens G patch domain containing 11 (GPATCH11), mRNA."	RefSeq	3.02393	3.23575	-1.54997	-1.15815	0.072829	0.064129	down
TC05001946.hg.1	TNIP1	NM_001252385	"Homo sapiens TNFAIP3 interacting protein 1 (TNIP1), transcript variant 1, mRNA."	RefSeq	4.66032	4.87188	-3.54446	-1.15795	0.007355	0.002462	down
TC03000953.hg.1	MFN1	NM_033540	"Homo sapiens mitofusin 1 (MFN1), nuclear gene encoding mitochondrial protein, mRNA."	RefSeq	3.84895	4.06051	-2.33236	-1.15794	0.022658	0.017021	down
TC06001493.hg.1	RNF39	NM_170769	"Homo sapiens ring finger protein 39 (RNF39), transcript variant 2, mRNA."	RefSeq	4.19736	4.40885	-1.84408	-1.15788	0.045255	0.042387	down
TC19001905.hg.1	ZNF814	NM_001144989	"Homo sapiens zinc finger protein 814 (ZNF814), mRNA."	RefSeq	2.42229	2.63374	-3.14324	-1.15785	0.010143	0.007304	down
TC21001058.hg.1	DONSON	NM_017613	"Homo sapiens downstream neighbor of SON (DONSON), mRNA."	RefSeq	3.54696	3.75841	-2.89671	-1.15785	0.012759	0.007304	down
TC02002104.hg.1	STARD7	NM_020151	"Homo sapiens StAR-related lipid transfer (START) domain containing 7 (STARD7), mRNA."	RefSeq	6.64035	6.85176	-2.77943	-1.15782	0.014363	0.011282	down
TC02005010.hg.1	SP140L	NM_138402	"Homo sapiens SP140 nuclear body protein-like (SP140L), mRNA."	RefSeq	2.41874	2.6301	-2.68116	-1.15778	0.015567	0.011282	down
TC01000339.hg.1	CEP85	NM_022778	"Homo sapiens centrosomal protein 85kDa (CEP85), mRNA."	RefSeq	2.98434	3.19566	-2.88662	-1.15775	0.012887	0.007304	down
TC05000218.hg.1	ITGA2	NM_002203	"Homo sapiens integrin, alpha 2 (CD49B, alpha 2 subunit of VLA-2 receptor) (ITGA2), transcript variant 1, mRNA."	RefSeq	5.43402	5.64527	-2.26355	-1.15769	0.024854	0.017021	down
TC12001425.hg.1	SCAF11	NM_004719	"Homo sapiens SR-related CTD-associated factor 11 (SCAF11), mRNA."	RefSeq	2.78595	2.99719	-2.54666	-1.15768	0.018043	0.011282	down
TC21000162.hg.1	TTC3	NM_001001894	"Homo sapiens tetratricopeptide repeat domain 3 (TTC3), transcript variant 2, mRNA."	RefSeq	4.39743	4.60854	-2.00338	-1.15758	0.035643	0.026443	down
TC19000619.hg.1	ZNF234	NM_006630	"Homo sapiens zinc finger protein 234 (ZNF234), transcript variant 1, mRNA."	RefSeq	2.33904	2.55014	-3.44273	-1.15757	0.007985	0.00432	down
TC14000263.hg.1	PRPF39	NM_017922	"Homo sapiens PRP39 pre-mRNA processing factor 39 homolog (S. cerevisiae) (PRPF39), mRNA."	RefSeq	2.96732	3.17837	-1.79508	-1.15753	0.048832	0.042387	down
TC07000384.hg.1	ZNF107	NM_001013746	"Homo sapiens zinc finger protein 107 (ZNF107), transcript variant 2, mRNA."	RefSeq	2.21068	2.42171	-2.05369	-1.15752	0.032976	0.026443	down
TC02000430.hg.1	ZNF638	NM_001014972	"Homo sapiens zinc finger protein 638 (ZNF638), transcript variant 2, mRNA."	RefSeq	4.2609	4.47154	-1.182	-1.1572	0.143447	0.178875	down
TC02000168.hg.1	CAD	NM_004341	"Homo sapiens carbamoyl-phosphate synthetase 2, aspartate transcarbamylase, and dihydroorotase (CAD), mRNA."	RefSeq	3.53618	3.74676	-2.85022	-1.15715	0.013358	0.007304	down
TC20000721.hg.1	GGTLC1	NM_178311	"Homo sapiens gamma-glutamyltransferase light chain 1 (GGTLC1), transcript variant A, mRNA."	RefSeq	3.25106	3.4615	-3.86576	-1.15704	0.005726	0.002462	down
TC07000829.hg.1	EXOC4	NM_001037126	"Homo sapiens exocyst complex component 4 (EXOC4), transcript variant 2, mRNA."	RefSeq	2.86352	3.07394	-4.019	-1.15702	0.005159	0.001624	down
TC01000450.hg.1	GJB3	NM_024009	"Homo sapiens gap junction protein, beta 3, 31kDa (GJB3), transcript variant 1, mRNA."	RefSeq	2.41299	2.62341	-3.58946	-1.15702	0.007164	0.002462	down
TC09000241.hg.1	LOC554249	BC084570	"Homo sapiens hypothetical LOC554249, mRNA (cDNA clone MGC:99799 IMAGE:6378300), complete cds."	GenBank	2.20756	2.41798	-1.99358	-1.15702	0.036152	0.026443	down
TC12000606.hg.1	MDM2	NM_002392	"Homo sapiens MDM2 oncogene, E3 ubiquitin protein ligase (MDM2), mRNA."	RefSeq	3.81115	4.02132	-2.51498	-1.15682	0.018647	0.011282	down
TC06000419.hg.1	PFDN6	NM_001185181	"Homo sapiens prefoldin subunit 6 (PFDN6), transcript variant 1, mRNA."	RefSeq	1.89739	2.10749	-1.64864	-1.15677	0.061544	0.064129	down
TC02000047.hg.1	CPSF3	NM_016207	"Homo sapiens cleavage and polyadenylation specific factor 3, 73kDa (CPSF3), mRNA."	RefSeq	4.97211	5.18206	-4.31456	-1.15665	0.004274	0.001369	down
TC12001489.hg.1	RACGAP1	NM_001126103	"Homo sapiens Rac GTPase activating protein 1 (RACGAP1), transcript variant 2, mRNA."	RefSeq	5.55688	5.76681	-3.05935	-1.15663	0.010875	0.007304	down
TC09001293.hg.1	ZCCHC6	NM_001185059	"Homo sapiens zinc finger, CCHC domain containing 6 (ZCCHC6), transcript variant 2, mRNA."	RefSeq	2.24239	2.45231	-2.66703	-1.15662	0.015834	0.011282	down
TC01001002.hg.1	DCLRE1B	NM_022836	"Homo sapiens DNA cross-link repair 1B (DCLRE1B), mRNA."	RefSeq	3.24779	3.45769	-2.13615	-1.1566	0.029456	0.026443	down
TC02001314.hg.1	WNT10A	NM_025216	"Homo sapiens wingless-type MMTV integration site family, member 10A (WNT10A), mRNA."	RefSeq	2.56696	2.77684	-1.79706	-1.15659	0.048686	0.042387	down
TC12001976.hg.1	TMEM116	NM_001193453	"Homo sapiens transmembrane protein 116 (TMEM116), transcript variant 2, mRNA."	RefSeq	1.95792	2.16764	-2.5426	-1.15647	0.018106	0.011282	down
TC13000807.hg.1	UGGT2	NM_020121	"Homo sapiens UDP-glucose glycoprotein glucosyltransferase 2 (UGGT2), mRNA."	RefSeq	2.37243	2.58208	-1.99422	-1.15641	0.036133	0.026443	down
TC20001021.hg.1	DIDO1	NM_022105	"Homo sapiens death inducer-obliterator 1 (DIDO1), transcript variant 1, mRNA."	RefSeq	3.65988	3.86951	-2.60345	-1.15639	0.016935	0.011282	down
TC04001455.hg.1	PAPSS1	NM_005443	"Homo sapiens 3'-phosphoadenosine 5'-phosphosulfate synthase 1 (PAPSS1), mRNA."	RefSeq	5.4956	5.7052	-3.27664	-1.15637	0.009093	0.00432	down
TC16001174.hg.1	NAE1	NM_001018159	"Homo sapiens NEDD8 activating enzyme E1 subunit 1 (NAE1), transcript variant 2, mRNA."	RefSeq	5.73492	5.94439	-2.559	-1.15627	0.017788	0.011282	down
TC08001286.hg.1	MYBL1	NM_001080416	"Homo sapiens v-myb myeloblastosis viral oncogene homolog (avian)-like 1 (MYBL1), transcript variant 1, mRNA."	RefSeq	1.86773	2.07719	-3.10808	-1.15626	0.010461	0.007304	down
TC05000453.hg.1	ANKRD32	NM_032290	"Homo sapiens ankyrin repeat domain 32 (ANKRD32), mRNA."	RefSeq	1.66929	1.87864	-2.65634	-1.15617	0.015999	0.011282	down
TC20000944.hg.1	ATP9A	NM_006045	"Homo sapiens ATPase, class II, type 9A (ATP9A), mRNA."	RefSeq	4.27329	4.48262	-2.68586	-1.15615	0.015477	0.011282	down
TC01001094.hg.1	PEX11B	NM_001184795	"Homo sapiens peroxisomal biogenesis factor 11 beta (PEX11B), transcript variant 2, mRNA."	RefSeq	3.55079	3.76003	-1.87465	-1.15608	0.042969	0.042387	down
TC17001465.hg.1	TNS4	NM_032865	"Homo sapiens tensin 4 (TNS4), mRNA."	RefSeq	6.78122	6.99037	-1.14428	-1.156	0.154631	0.178875	down
TC06000761.hg.1	TTK	NM_003318	"Homo sapiens TTK protein kinase (TTK), transcript variant 1, mRNA."	RefSeq	3.35791	3.5669	-2.11566	-1.15587	0.030239	0.026443	down
TC02001119.hg.1	MFSD6	NM_017694	"Homo sapiens major facilitator superfamily domain containing 6 (MFSD6), mRNA."	RefSeq	4.91072	5.11964	-3.59197	-1.15582	0.007151	0.002462	down
TC01001112.hg.1	CHD1L	NM_001256336	"Homo sapiens chromodomain helicase DNA binding protein 1-like (CHD1L), transcript variant 2, mRNA."	RefSeq	3.60942	3.81833	-1.59641	-1.15581	0.067292	0.064129	down
TC11000718.hg.1	CCND1	NM_053056	"Homo sapiens cyclin D1 (CCND1), mRNA."	RefSeq	7.38612	7.595	-2.12381	-1.15579	0.029984	0.026443	down
TC02001891.hg.1	USP34	NM_014709	"Homo sapiens ubiquitin specific peptidase 34 (USP34), mRNA."	RefSeq	4.5291	4.73795	-1.37329	-1.15577	0.099666	0.103127	down
TC01003225.hg.1	RFX5	NM_000449	"Homo sapiens regulatory factor X, 5 (influences HLA class II expression) (RFX5), transcript variant 1, mRNA."	RefSeq	2.82553	3.0341	-3.6538	-1.15554	0.006776	0.002462	down
TC07003379.hg.1	COPG2	NM_012133	"Homo sapiens coatomer protein complex, subunit gamma 2 (COPG2), mRNA."	RefSeq	5.82291	6.03124	-2.7578	-1.15535	0.014644	0.011282	down
TC03000191.hg.1	XYLB	NM_005108	"Homo sapiens xylulokinase homolog (H. influenzae) (XYLB), mRNA."	RefSeq	2.37536	2.58359	-3.14797	-1.15527	0.010111	0.007304	down
TC21000536.hg.1	SUMO3	NM_006936	"Homo sapiens SMT3 suppressor of mif two 3 homolog 3 (S. cerevisiae) (SUMO3), mRNA."	RefSeq	4.15826	4.36648	-3.08898	-1.15526	0.010621	0.007304	down
TC02001814.hg.1	ATP6V1E2	NM_080653	"Homo sapiens ATPase, H+ transporting, lysosomal 31kDa, V1 subunit E2 (ATP6V1E2), mRNA."	RefSeq	1.78464	1.99282	-2.02424	-1.15523	0.034542	0.026443	down
TC16000449.hg.1	FTO	NM_001080432	"Homo sapiens fat mass and obesity associated (FTO), mRNA."	RefSeq	3.34004	3.54798	-2.81658	-1.15504	0.013835	0.007304	down
TC04001197.hg.1	SCFD2	NM_152540	"Homo sapiens sec1 family domain containing 2 (SCFD2), mRNA."	RefSeq	2.36864	2.57658	-1.6546	-1.15504	0.060863	0.064129	down
TC04000320.hg.1	TMEM165	NM_018475	"Homo sapiens transmembrane protein 165 (TMEM165), transcript variant 1, mRNA."	RefSeq	2.81205	3.01992	-2.82416	-1.15499	0.013689	0.007304	down
TC0X001092.hg.1	ARHGEF9	NM_001173479	"Homo sapiens Cdc42 guanine nucleotide exchange factor (GEF) 9 (ARHGEF9), transcript variant 2, mRNA."	RefSeq	2.04243	2.25014	-2.58413	-1.15485	0.017374	0.011282	down
TC13000754.hg.1	RNF219	NM_024546	"Homo sapiens ring finger protein 219 (RNF219), mRNA."	RefSeq	2.90044	3.10799	-1.63551	-1.15472	0.062868	0.064129	down
TC17001903.hg.1	ST6GALNAC2	NM_006456	"Homo sapiens ST6 (alpha-N-acetyl-neuraminyl-2,3-beta-galactosyl-1, 3)-N-acetylgalactosaminide alpha-2,6-sialyltransferase 2 (ST6GALNAC2), mRNA."	RefSeq	4.12786	4.3353	-1.00759	-1.15464	0.202473	0.270995	down
TC07001230.hg.1	HIBADH	NM_152740	"Homo sapiens 3-hydroxyisobutyrate dehydrogenase (HIBADH), mRNA."	RefSeq	5.8058	6.01322	-2.13114	-1.15462	0.02964	0.026443	down
TC02002619.hg.1	HIBCH	NM_014362	"Homo sapiens 3-hydroxyisobutyryl-CoA hydrolase (HIBCH), nuclear gene encoding mitochondrial protein, transcript variant 1, mRNA."	RefSeq	1.75853	1.96592	-3.03651	-1.1546	0.011104	0.007304	down
TC01001430.hg.1	NUF2	NM_031423	"Homo sapiens NUF2, NDC80 kinetochore complex component, homolog (S. cerevisiae) (NUF2), transcript variant 2, mRNA."	RefSeq	3.76938	3.97667	-2.763	-1.15452	0.014599	0.011282	down
TC07000561.hg.1	CASD1	NM_022900	"Homo sapiens CAS1 domain containing 1 (CASD1), mRNA."	RefSeq	3.52238	3.72961	-2.04862	-1.15447	0.03323	0.026443	down
TC08000645.hg.1	FZD6	NM_001164615	"Homo sapiens frizzled family receptor 6 (FZD6), transcript variant 2, mRNA."	RefSeq	2.7369	2.94413	-2.51781	-1.15446	0.018609	0.011282	down
TC13000111.hg.1	BRCA2	NM_000059	"Homo sapiens breast cancer 2, early onset (BRCA2), mRNA."	RefSeq	1.93044	2.13762	-1.59902	-1.15444	0.066922	0.064129	down
TC06001035.hg.1	HECA	NM_016217	"Homo sapiens headcase homolog (Drosophila) (HECA), mRNA."	RefSeq	3.42839	3.6355	-1.69693	-1.15437	0.056795	0.042387	down
TC14001315.hg.1	MLH3	NM_001040108	"Homo sapiens mutL homolog 3 (E. coli) (MLH3), transcript variant 1, mRNA."	RefSeq	2.20523	2.41215	-1.88714	-1.15422	0.042199	0.042387	down
TC05002170.hg.1	TRIM52	NM_032765	"Homo sapiens tripartite motif containing 52 (TRIM52), mRNA."	RefSeq	2.21575	2.42241	-2.31298	-1.15402	0.023243	0.017021	down
TC01000728.hg.1	AK4	NM_001005353	"Homo sapiens adenylate kinase 4 (AK4), nuclear gene encoding mitochondrial protein, transcript variant 1, mRNA."	RefSeq	4.06259	4.26922	-2.82126	-1.15399	0.013771	0.007304	down
TC15000936.hg.1	NR2F2	NM_001145156	"Homo sapiens nuclear receptor subfamily 2, group F, member 2 (NR2F2), transcript variant 3, mRNA."	RefSeq	5.64201	5.84861	-2.67675	-1.15396	0.015675	0.011282	down
TC14000205.hg.1	ARHGAP5	NM_001030055	"Homo sapiens Rho GTPase activating protein 5 (ARHGAP5), transcript variant 1, mRNA."	RefSeq	5.34179	5.54832	-1.67406	-1.15391	0.059087	0.064129	down
TC13000021.hg.1	ZMYM2	NM_197968	"Homo sapiens zinc finger, MYM-type 2 (ZMYM2), transcript variant 2, mRNA."	RefSeq	4.52283	4.7293	-2.45253	-1.15386	0.01994	0.017021	down
TC0X001090.hg.1	SPIN4	NM_001012968	"Homo sapiens spindlin family, member 4 (SPIN4), mRNA."	RefSeq	3.19529	3.40175	-1.82409	-1.15385	0.046591	0.042387	down
TC11000957.hg.1	BIRC2	NM_001166	"Homo sapiens baculoviral IAP repeat containing 2 (BIRC2), transcript variant 1, mRNA."	RefSeq	4.13001	4.33641	-2.33128	-1.15381	0.022696	0.017021	down
TC6_apd_hap1000066.hg.1	RNF39	NM_025236	"Homo sapiens ring finger protein 39 (RNF39), transcript variant 1, mRNA."	RefSeq	3.23092	3.43731	-1.43264	-1.1538	0.089529	0.103127	down
TC6_dbb_hap3000119.hg.1	RNF39	NM_025236	"Homo sapiens ring finger protein 39 (RNF39), transcript variant 1, mRNA."	RefSeq	3.23092	3.43731	-1.43264	-1.1538	0.089529	0.103127	down
TC6_mcf_hap5000110.hg.1	RNF39	NM_025236	"Homo sapiens ring finger protein 39 (RNF39), transcript variant 1, mRNA."	RefSeq	3.23092	3.43731	-1.43264	-1.1538	0.089529	0.103127	down
TC6_ssto_hap7000111.hg.1	RNF39	NM_025236	"Homo sapiens ring finger protein 39 (RNF39), transcript variant 1, mRNA."	RefSeq	3.23092	3.43731	-1.43264	-1.1538	0.089529	0.103127	down
TC02002172.hg.1	RGPD3	NM_001144013	"Homo sapiens RANBP2-like and GRIP domain containing 3 (RGPD3), mRNA."	RefSeq	4.81128	5.01761	-1.56203	-1.15375	0.071512	0.064129	down
TC05000279.hg.1	NLN	NM_020726	"Homo sapiens neurolysin (metallopeptidase M3 family) (NLN), nuclear gene encoding mitochondrial protein, mRNA."	RefSeq	4.10417	4.31041	-2.42666	-1.15368	0.020417	0.017021	down
TC04001723.hg.1	CBR4	NM_032783	"Homo sapiens carbonyl reductase 4 (CBR4), mRNA."	RefSeq	2.88486	3.09107	-2.09811	-1.15365	0.030983	0.026443	down
TC06001538.hg.1	LY6G6C	NM_025261	"Homo sapiens lymphocyte antigen 6 complex, locus G6C (LY6G6C), mRNA."	RefSeq	2.02723	2.23342	-2.24446	-1.15364	0.025404	0.017021	down
TC6_cox_hap2000167.hg.1	LY6G6C	NM_025261	"Homo sapiens lymphocyte antigen 6 complex, locus G6C (LY6G6C), mRNA."	RefSeq	2.02723	2.23342	-2.24446	-1.15364	0.025404	0.017021	down
TC6_dbb_hap3000156.hg.1	LY6G6C	NM_025261	"Homo sapiens lymphocyte antigen 6 complex, locus G6C (LY6G6C), mRNA."	RefSeq	2.02723	2.23342	-2.24446	-1.15364	0.025404	0.017021	down
TC6_mann_hap4000144.hg.1	LY6G6C	NM_025261	"Homo sapiens lymphocyte antigen 6 complex, locus G6C (LY6G6C), mRNA."	RefSeq	2.02723	2.23342	-2.24446	-1.15364	0.025404	0.017021	down
TC6_mcf_hap5000144.hg.1	LY6G6C	NM_025261	"Homo sapiens lymphocyte antigen 6 complex, locus G6C (LY6G6C), mRNA."	RefSeq	2.02723	2.23342	-2.24446	-1.15364	0.025404	0.017021	down
TC6_ssto_hap7000139.hg.1	LY6G6C	NM_025261	"Homo sapiens lymphocyte antigen 6 complex, locus G6C (LY6G6C), mRNA."	RefSeq	2.02723	2.23342	-2.24446	-1.15364	0.025404	0.017021	down
TC05001747.hg.1	C5orf63	NM_001164478	"Homo sapiens chromosome 5 open reading frame 63 (C5orf63), transcript variant 2, mRNA."	RefSeq	2.60426	2.81036	-3.16544	-1.15357	0.010016	0.00432	down
TC06001082.hg.1	GINM1	NM_138785	"Homo sapiens glycoprotein integral membrane 1 (GINM1), mRNA."	RefSeq	4.20833	4.41413	-2.13736	-1.15333	0.029411	0.026443	down
TC17001664.hg.1	PHB	NM_002634	"Homo sapiens prohibitin (PHB), mRNA."	RefSeq	4.71642	4.92213	-2.03192	-1.15326	0.034179	0.026443	down
TC22000256.hg.1	HMGXB4	NM_001003681	"Homo sapiens HMG box domain containing 4 (HMGXB4), transcript variant 1, mRNA."	RefSeq	5.057	5.26269	-3.33872	-1.15324	0.008577	0.00432	down
TC03001705.hg.1	PARP9	NM_001146102	"Homo sapiens poly (ADP-ribose) polymerase family, member 9 (PARP9), transcript variant 2, mRNA."	RefSeq	2.05683	2.26246	-2.40975	-1.15319	0.020856	0.017021	down
TC12001068.hg.1	ZNF84	NM_001127372	"Homo sapiens zinc finger protein 84 (ZNF84), transcript variant 2, mRNA."	RefSeq	4.01959	4.22513	-3.17363	-1.15311	0.009933	0.00432	down
TC13001721.hg.1	ERCC5	NM_000123	"Homo sapiens excision repair cross-complementing rodent repair deficiency, complementation group 5 (ERCC5), mRNA."	RefSeq	3.62435	3.82975	-1.63989	-1.15301	0.062454	0.064129	down
TC01002468.hg.1	MARCKSL1	NM_023009	"Homo sapiens MARCKS-like 1 (MARCKSL1), transcript variant 1, mRNA."	RefSeq	3.58688	3.79223	-1.13437	-1.15297	0.157813	0.178875	down
TC19001151.hg.1	ZNF562	NM_001130031	"Homo sapiens zinc finger protein 562 (ZNF562), transcript variant 1, mRNA."	RefSeq	4.81224	5.01756	-1.79168	-1.15294	0.049093	0.042387	down
TC01002519.hg.1	GNL2	NM_013285	"Homo sapiens guanine nucleotide binding protein-like 2 (nucleolar) (GNL2), mRNA."	RefSeq	4.98576	5.19101	-2.65877	-1.15289	0.015955	0.011282	down
TC07001222.hg.1	HOXA6	NM_024014	"Homo sapiens homeobox A6 (HOXA6), mRNA."	RefSeq	5.20521	5.41032	-2.09324	-1.15277	0.031187	0.026443	down
TC04001824.hg.1	FAT1	NM_005245	"Homo sapiens FAT tumor suppressor homolog 1 (Drosophila) (FAT1), mRNA."	RefSeq	8.68072	8.88581	-2.13808	-1.15276	0.029386	0.026443	down
TC02002666.hg.1	CLK1	NM_001162407	"Homo sapiens CDC-like kinase 1 (CLK1), transcript variant 2, mRNA."	RefSeq	3.75163	3.9566	-2.27429	-1.15266	0.024497	0.017021	down
TC10000169.hg.1	KIAA1217	NM_001098500	"Homo sapiens KIAA1217 (KIAA1217), transcript variant 2, mRNA."	RefSeq	3.72401	3.92891	-3.66364	-1.15261	0.006725	0.002462	down
TC16000425.hg.1	ORC6	NM_014321	"Homo sapiens origin recognition complex, subunit 6 (ORC6), transcript variant 1, mRNA."	RefSeq	2.41824	2.62313	-2.62687	-1.1526	0.016489	0.011282	down
TC01003801.hg.1	INTS7	NM_001199809	"Homo sapiens integrator complex subunit 7 (INTS7), transcript variant 4, mRNA."	RefSeq	4.45183	4.65667	-2.12545	-1.15256	0.029895	0.026443	down
TC02004931.hg.1	ZNF514	NM_032788	"Homo sapiens zinc finger protein 514 (ZNF514), mRNA."	RefSeq	1.95946	2.16418	-3.21335	-1.15246	0.009577	0.00432	down
TC03001719.hg.1	MUC13	NM_033049	"Homo sapiens mucin 13, cell surface associated (MUC13), mRNA."	RefSeq	4.29309	4.49769	-1.91772	-1.15237	0.040372	0.042387	down
TC06000149.hg.1	GMNN	NM_001251989	"Homo sapiens geminin, DNA replication inhibitor (GMNN), transcript variant 2, mRNA."	RefSeq	2.78546	2.99004	-2.06414	-1.15235	0.032562	0.026443	down
TC01006300.hg.1	STIL	NM_003035	"Homo sapiens SCL/TAL1 interrupting locus (STIL), transcript variant 2, mRNA."	RefSeq	4.81667	5.02122	-1.67679	-1.15233	0.058838	0.064129	down
TC14001097.hg.1	NEMF	NM_004713	"Homo sapiens nuclear export mediator factor (NEMF), mRNA."	RefSeq	3.76645	3.9709	-1.83942	-1.15225	0.045592	0.042387	down
TC17000399.hg.1	AP2B1	NM_001030006	"Homo sapiens adaptor-related protein complex 2, beta 1 subunit (AP2B1), transcript variant 1, mRNA."	RefSeq	8.12472	8.32914	-3.65597	-1.15222	0.006763	0.002462	down
TC17000090.hg.1	KCTD11	NM_001002914	"Homo sapiens potassium channel tetramerisation domain containing 11 (KCTD11), mRNA."	RefSeq	3.63881	3.84323	-1.59387	-1.15222	0.067578	0.064129	down
TC13000112.hg.1	PDS5B	NM_015032	"Homo sapiens PDS5, regulator of cohesion maintenance, homolog B (S. cerevisiae) (PDS5B), mRNA."	RefSeq	3.34928	3.55361	-1.63069	-1.15215	0.063434	0.064129	down
TC11000981.hg.1	DDX10	NM_004398	"Homo sapiens DEAD (Asp-Glu-Ala-Asp) box polypeptide 10 (DDX10), mRNA."	RefSeq	3.13572	3.34003	-1.87525	-1.15214	0.042938	0.042387	down
TC03003392.hg.1	ZNF148	NM_021964	"Homo sapiens zinc finger protein 148 (ZNF148), mRNA."	RefSeq	4.37375	4.57784	-2.22927	-1.15196	0.025936	0.017021	down
TC19002662.hg.1	ZNF17	NM_006959	"Homo sapiens zinc finger protein 17 (ZNF17), mRNA."	RefSeq	1.83295	2.03703	-1.46704	-1.15196	0.083994	0.103127	down
TC02005002.hg.1	KLHL23	NM_144711	"Homo sapiens kelch-like family member 23 (KLHL23), mRNA."	RefSeq	1.62771	1.83179	-4.07262	-1.15195	0.005025	0.001624	down
TC05000427.hg.1	COX7C	NM_001867	"Homo sapiens cytochrome c oxidase subunit VIIc (COX7C), nuclear gene encoding mitochondrial protein, mRNA."	RefSeq	2.60407	2.8081	-2.56478	-1.15191	0.017705	0.011282	down
TC02002204.hg.1	BUB1	NM_004336	"Homo sapiens BUB1 mitotic checkpoint serine/threonine kinase (BUB1), mRNA."	RefSeq	5.62363	5.82761	-2.10492	-1.15187	0.030652	0.026443	down
TC17000480.hg.1	ERBB2	NM_001005862	"Homo sapiens v-erb-b2 erythroblastic leukemia viral oncogene homolog 2, neuro/glioblastoma derived oncogene homolog (avian) (ERBB2), transcript variant 2, mRNA."	RefSeq	4.54084	4.74477	-4.17745	-1.15183	0.00472	0.001624	down
TC09001459.hg.1	TMEM245	NM_032012	"Homo sapiens transmembrane protein 245 (TMEM245), mRNA."	RefSeq	5.82552	6.02945	-1.989	-1.15183	0.036375	0.026443	down
TC02002853.hg.1	SP110	NM_001185015	"Homo sapiens SP110 nuclear body protein (SP110), transcript variant d, mRNA."	RefSeq	2.01621	2.22002	-4.19668	-1.15173	0.004656	0.001624	down
TC14002301.hg.1	PTGR2	NM_001146154	"Homo sapiens prostaglandin reductase 2 (PTGR2), transcript variant 2, mRNA."	RefSeq	2.72782	2.9316	-2.72336	-1.15171	0.015025	0.011282	down
TC02001386.hg.1	PSMD1	NM_001191037	"Homo sapiens proteasome (prosome, macropain) 26S subunit, non-ATPase, 1 (PSMD1), transcript variant 2, mRNA."	RefSeq	5.80311	6.00679	-2.8335	-1.15163	0.013574	0.007304	down
TC07000142.hg.1	NUPL2	NM_007342	"Homo sapiens nucleoporin like 2 (NUPL2), mRNA."	RefSeq	2.00577	2.20931	-3.79194	-1.15151	0.00598	0.002462	down
TC18000380.hg.1	FAM210A	NM_001098801	"Homo sapiens family with sequence similarity 210, member A (FAM210A), transcript variant 1, mRNA."	RefSeq	3.29148	3.49498	-2.90927	-1.15149	0.012556	0.007304	down
TC06001260.hg.1	TFAP2A	NM_003220	"Homo sapiens transcription factor AP-2 alpha (activating enhancer binding protein 2 alpha) (TFAP2A), transcript variant 1, mRNA."	RefSeq	1.68972	1.89313	-4.10468	-1.15142	0.004873	0.001624	down
TC03001538.hg.1	UBA3	NM_003968	"Homo sapiens ubiquitin-like modifier activating enzyme 3 (UBA3), transcript variant 1, mRNA."	RefSeq	4.8265	5.02988	-2.45704	-1.1514	0.019857	0.017021	down
TC08000479.hg.1	TERF1	NM_003218	"Homo sapiens telomeric repeat binding factor (NIMA-interacting) 1 (TERF1), transcript variant 2, mRNA."	RefSeq	3.86154	4.06468	-4.0542	-1.15121	0.005064	0.001624	down
TC08001497.hg.1	UBR5	NM_015902	"Homo sapiens ubiquitin protein ligase E3 component n-recognin 5 (UBR5), mRNA."	RefSeq	4.29219	4.49525	-1.4064	-1.15114	0.093962	0.103127	down
TC05000333.hg.1	BDP1	NM_018429	"Homo sapiens B double prime 1, subunit of RNA polymerase III transcription initiation factor IIIB (BDP1), mRNA."	RefSeq	2.75781	2.96086	-1.62398	-1.15113	0.064077	0.064129	down
TC11001541.hg.1	FBXO3	NM_012175	"Homo sapiens F-box protein 3 (FBXO3), transcript variant 1, mRNA."	RefSeq	3.74705	3.95009	-3.28575	-1.15112	0.009055	0.00432	down
TC17000617.hg.1	PNPO	NM_018129	"Homo sapiens pyridoxamine 5'-phosphate oxidase (PNPO), mRNA."	RefSeq	5.25976	5.46265	-1.97638	-1.151	0.037056	0.026443	down
TC04001216.hg.1	NMU	NM_006681	"Homo sapiens neuromedin U (NMU), mRNA."	RefSeq	1.9833	2.18615	-1.55874	-1.15097	0.071811	0.064129	down
TC02000245.hg.1	GALM	NM_138801	"Homo sapiens galactose mutarotase (aldose 1-epimerase) (GALM), mRNA."	RefSeq	2.59836	2.80108	-3.29052	-1.15086	0.008978	0.00432	down
TC19001297.hg.1	SUGP2	NM_014884	"Homo sapiens SURP and G patch domain containing 2 (SUGP2), transcript variant 2, mRNA."	RefSeq	3.5539	3.75656	-4.76045	-1.15082	0.003167	0.001369	down
TC15000412.hg.1	TMOD3	NM_014547	"Homo sapiens tropomodulin 3 (ubiquitous) (TMOD3), mRNA."	RefSeq	5.77016	5.97276	-2.45862	-1.15077	0.019819	0.017021	down
TC14001260.hg.1	ERH	NM_004450	"Homo sapiens enhancer of rudimentary homolog (Drosophila) (ERH), mRNA."	RefSeq	5.61763	5.81995	-2.17967	-1.15054	0.027973	0.026443	down
TC12000262.hg.1	MED21	NM_004264	"Homo sapiens mediator complex subunit 21 (MED21), transcript variant 1, mRNA."	RefSeq	4.91925	5.12156	-2.40617	-1.15054	0.020977	0.017021	down
TC01001267.hg.1	UBAP2L	NM_001127320	"Homo sapiens ubiquitin associated protein 2-like (UBAP2L), transcript variant 2, mRNA."	RefSeq	6.19985	6.40213	-3.94441	-1.15051	0.005426	0.001624	down
TC02001739.hg.1	EIF2AK2	NM_001135651	"Homo sapiens eukaryotic translation initiation factor 2-alpha kinase 2 (EIF2AK2), transcript variant 2, mRNA."	RefSeq	7.12901	7.33115	-1.99688	-1.15041	0.036006	0.026443	down
TC05000364.hg.1	POLK	NM_016218	"Homo sapiens polymerase (DNA directed) kappa (POLK), mRNA."	RefSeq	2.2796	2.48171	-1.70681	-1.15038	0.055955	0.042387	down
TC6_cox_hap2000130.hg.1	RNF39	NM_025236	"Homo sapiens ring finger protein 39 (RNF39), transcript variant 1, mRNA."	RefSeq	3.18149	3.38352	-1.35124	-1.15031	0.103912	0.103127	down
TC07001223.hg.1	HOXA7	NM_006896	"Homo sapiens homeobox A7 (HOXA7), mRNA."	RefSeq	4.11243	4.31442	-2.62636	-1.15029	0.016496	0.011282	down
TC16000305.hg.1	EIF3C	NM_001037808	"Homo sapiens eukaryotic translation initiation factor 3, subunit C (EIF3C), transcript variant 2, mRNA."	RefSeq	8.18187	8.38386	-2.69729	-1.15028	0.015331	0.011282	down
TC6_cox_hap2000109.hg.1	PFDN6	NM_001185181	"Homo sapiens prefoldin subunit 6 (PFDN6), transcript variant 1, mRNA."	RefSeq	1.89039	2.09237	-1.9459	-1.15027	0.038584	0.026443	down
TC6_dbb_hap3000101.hg.1	PFDN6	NM_001185181	"Homo sapiens prefoldin subunit 6 (PFDN6), transcript variant 1, mRNA."	RefSeq	1.89039	2.09237	-1.9459	-1.15027	0.038584	0.026443	down
TC6_qbl_hap6000100.hg.1	PFDN6	NM_001185181	"Homo sapiens prefoldin subunit 6 (PFDN6), transcript variant 1, mRNA."	RefSeq	1.89039	2.09237	-1.9459	-1.15027	0.038584	0.026443	down
TC06002059.hg.1	MCM9	NM_017696	"Homo sapiens minichromosome maintenance complex component 9 (MCM9), transcript variant 1, mRNA."	RefSeq	2.01396	2.21579	-3.75448	-1.15016	0.006222	0.002462	down
TC19000755.hg.1	MYH14	NM_001077186	"Homo sapiens myosin, heavy chain 14, non-muscle (MYH14), transcript variant 1, mRNA."	RefSeq	4.59208	4.79389	-2.02071	-1.15014	0.034726	0.026443	down
TC02001260.hg.1	ATIC	NM_004044	"Homo sapiens 5-aminoimidazole-4-carboxamide ribonucleotide formyltransferase/IMP cyclohydrolase (ATIC), mRNA."	RefSeq	5.70584	5.9076	-2.8256	-1.1501	0.01367	0.007304	down
TC07001597.hg.1	KRIT1	NM_194456	"Homo sapiens KRIT1, ankyrin repeat containing (KRIT1), transcript variant 1, mRNA."	RefSeq	3.3145	3.51619	-1.82845	-1.15004	0.046318	0.042387	down
TC07000565.hg.1	PPP1R9A	NM_001166161	"Homo sapiens protein phosphatase 1, regulatory subunit 9A (PPP1R9A), transcript variant 2, mRNA."	RefSeq	2.97924	3.18086	-1.39383	-1.14999	0.096069	0.103127	down
TC08001359.hg.1	ZNF704	NM_001033723	"Homo sapiens zinc finger protein 704 (ZNF704), mRNA."	RefSeq	2.36704	2.56835	-2.08086	-1.14974	0.031735	0.026443	down
TC04001347.hg.1	HPSE	NM_006665	"Homo sapiens heparanase (HPSE), transcript variant 1, mRNA."	RefSeq	2.69111	2.89242	-2.54085	-1.14973	0.018151	0.011282	down
TC10001109.hg.1	ARHGAP21	NM_020824	"Homo sapiens Rho GTPase activating protein 21 (ARHGAP21), mRNA."	RefSeq	3.95324	4.15453	-2.01655	-1.14972	0.034885	0.026443	down
TC20000140.hg.1	XRN2	NM_012255	"Homo sapiens 5'-3' exoribonuclease 2 (XRN2), mRNA."	RefSeq	6.4614	6.6626	-1.663	-1.14966	0.060022	0.064129	down
TC09000918.hg.1	ZDHHC21	NM_178566	"Homo sapiens zinc finger, DHHC-type containing 21 (ZDHHC21), mRNA."	RefSeq	2.79643	2.99753	-1.68015	-1.14958	0.058437	0.064129	down
TC14000554.hg.1	CALM1	NM_006888	"Homo sapiens calmodulin 1 (phosphorylase kinase, delta) (CALM1), mRNA."	RefSeq	6.04784	6.24885	-2.96723	-1.14951	0.011875	0.007304	down
TC01000465.hg.1	AGO3	NM_024852	"Homo sapiens argonaute RISC catalytic component 3 (AGO3), transcript variant 1, mRNA."	RefSeq	3.39042	3.5913	-2.58864	-1.1494	0.017311	0.011282	down
TC15001736.hg.1	EFTUD1	NM_001040610	"Homo sapiens elongation factor Tu GTP binding domain containing 1 (EFTUD1), transcript variant 2, mRNA."	RefSeq	4.15306	4.35388	-1.9222	-1.14935	0.040105	0.042387	down
TC6_cox_hap2000116.hg.1	ZNF311	NM_001010877	"Homo sapiens zinc finger protein 311 (ZNF311), mRNA."	RefSeq	1.96765	2.16844	-2.05446	-1.14932	0.032944	0.026443	down
TC10000301.hg.1	GPRIN2	ENST00000374314	cdna:known chromosome:GRCh37:10:46997926:47005643:1 gene:ENSG00000204175 gene_biotype:protein_coding transcript_biotype:protein_coding	ENSEMBL	1.60896	1.80973	-2.90924	-1.14931	0.012562	0.007304	down
TC01002923.hg.1	EXTL2	NM_001033025	"Homo sapiens exostosin-like glycosyltransferase 2 (EXTL2), transcript variant 2, mRNA."	RefSeq	1.72789	1.92843	-3.14288	-1.14913	0.01015	0.007304	down
TC16000568.hg.1	NIP7	NM_001199434	"Homo sapiens NIP7, nucleolar pre-rRNA processing protein (NIP7), transcript variant 2, mRNA."	RefSeq	4.77003	4.97052	-2.31335	-1.14909	0.02323	0.017021	down
TC22000262.hg.1	APOL6	NM_030641	"Homo sapiens apolipoprotein L, 6 (APOL6), mRNA."	RefSeq	4.35074	4.55119	-1.21898	-1.14905	0.133886	0.178875	down
TC02000215.hg.1	TTC27	NM_001193509	"Homo sapiens tetratricopeptide repeat domain 27 (TTC27), transcript variant 2, mRNA."	RefSeq	3.05785	3.25818	-1.6003	-1.14896	0.066763	0.064129	down
TC17001520.hg.1	ACLY	NM_001096	"Homo sapiens ATP citrate lyase (ACLY), transcript variant 1, mRNA."	RefSeq	6.52249	6.72278	-2.0458	-1.14893	0.033377	0.026443	down
TC07002014.hg.1	ACTR3C	NM_001164458	"Homo sapiens ARP3 actin-related protein 3 homolog C (yeast) (ACTR3C), transcript variant 1, mRNA."	RefSeq	2.48322	2.68349	-2.11015	-1.14892	0.030436	0.026443	down
TC21000185.hg.1	BACE2	NM_138992	"Homo sapiens beta-site APP-cleaving enzyme 2 (BACE2), transcript variant b, mRNA."	RefSeq	4.0317	4.23194	-2.38286	-1.14888	0.021429	0.017021	down
TC16002071.hg.1	MVP	NM_005115	"Homo sapiens major vault protein (MVP), transcript variant 2, mRNA."	RefSeq	4.40941	4.60931	-1.51277	-1.14862	0.077438	0.064129	down
TC17000120.hg.1	CHD3	NM_001005271	"Homo sapiens chromodomain helicase DNA binding protein 3 (CHD3), transcript variant 3, mRNA."	RefSeq	4.65271	4.85256	-2.49297	-1.14858	0.019112	0.017021	down
TC10000721.hg.1	SCD	NM_005063	"Homo sapiens stearoyl-CoA desaturase (delta-9-desaturase) (SCD), mRNA."	RefSeq	7.50307	7.7029	-3.03286	-1.14856	0.011155	0.007304	down
TC02005011.hg.1	GIGYF2	NM_001103146	"Homo sapiens GRB10 interacting GYF protein 2 (GIGYF2), transcript variant 3, mRNA."	RefSeq	2.64352	2.84326	-2.86282	-1.14849	0.01325	0.007304	down
TC17001892.hg.1	SRP68	NM_014230	"Homo sapiens signal recognition particle 68kDa (SRP68), transcript variant 1, mRNA."	RefSeq	6.30077	6.50047	-2.45171	-1.14846	0.019965	0.017021	down
TC0X000267.hg.1	PLP2	NM_002668	"Homo sapiens proteolipid protein 2 (colonic epithelium-enriched) (PLP2), mRNA."	RefSeq	8.19598	8.3955	-2.41032	-1.14832	0.020843	0.017021	down
TC18000453.hg.1	ZNF24	NM_006965	"Homo sapiens zinc finger protein 24 (ZNF24), mRNA."	RefSeq	4.8238	5.02326	-3.90974	-1.14827	0.005554	0.001624	down
TC19000957.hg.1	ZNF544	NM_014480	"Homo sapiens zinc finger protein 544 (ZNF544), mRNA."	RefSeq	2.92565	3.12506	-1.3611	-1.14823	0.10204	0.103127	down
TC08001532.hg.1	KCNV1	NM_014379	"Homo sapiens potassium channel, subfamily V, member 1 (KCNV1), mRNA."	RefSeq	2.66288	2.86223	-2.90918	-1.14819	0.012568	0.007304	down
TC16000084.hg.1	SRRM2	NM_016333	"Homo sapiens serine/arginine repetitive matrix 2 (SRRM2), mRNA."	RefSeq	5.95118	6.15041	-3.4903	-1.14808	0.007712	0.00432	down
TC12000992.hg.1	TCTN2	NM_001143850	"Homo sapiens tectonic family member 2 (TCTN2), transcript variant 2, mRNA."	RefSeq	2.57297	2.77199	-1.50835	-1.14792	0.078125	0.064129	down
TC08001269.hg.1	GGH	NM_003878	"Homo sapiens gamma-glutamyl hydrolase (conjugase, folylpolygammaglutamyl hydrolase) (GGH), mRNA."	RefSeq	4.02115	4.2201	-2.20341	-1.14786	0.026929	0.026443	down
TC01000860.hg.1	CCDC18	NM_206886	"Homo sapiens coiled-coil domain containing 18 (CCDC18), mRNA."	RefSeq	1.58496	1.78378	-2.75283	-1.14776	0.01472	0.011282	down
TC17000664.hg.1	EME1	NM_001166131	"Homo sapiens essential meiotic endonuclease 1 homolog 1 (S. pombe) (EME1), transcript variant 1, mRNA."	RefSeq	2.66648	2.86529	-2.39391	-1.14776	0.021187	0.017021	down
TC01000512.hg.1	ZFP69	NM_198494	"Homo sapiens ZFP69 zinc finger protein (ZFP69), mRNA."	RefSeq	1.70432	1.90311	-2.37273	-1.14774	0.021665	0.017021	down
TC06001010.hg.1	MYB	NM_001130172	"Homo sapiens v-myb myeloblastosis viral oncogene homolog (avian) (MYB), transcript variant 3, mRNA."	RefSeq	2.80507	3.00385	-1.6892	-1.14773	0.057489	0.064129	down
TC05000166.hg.1	NIPBL	NM_015384	"Homo sapiens Nipped-B homolog (Drosophila) (NIPBL), transcript variant B, mRNA."	RefSeq	2.87674	3.07541	-1.34341	-1.14764	0.105535	0.103127	down
TC05003400.hg.1	DDX46	NM_014829	"Homo sapiens DEAD (Asp-Glu-Ala-Asp) box polypeptide 46 (DDX46), mRNA."	RefSeq	3.81919	4.0178	-1.786	-1.14759	0.049539	0.042387	down
TC08000528.hg.1	LRRCC1	NM_033402	"Homo sapiens leucine rich repeat and coiled-coil centrosomal protein 1 (LRRCC1), mRNA."	RefSeq	1.58496	1.78343	-3.05653	-1.14748	0.010926	0.007304	down
TC05002135.hg.1	HNRNPH1	NM_005520	"Homo sapiens heterogeneous nuclear ribonucleoprotein H1 (H) (HNRNPH1), transcript variant 2, mRNA."	RefSeq	4.50376	4.70221	-2.31263	-1.14747	0.023256	0.017021	down
TC14001224.hg.1	RAB15	NM_198686	"Homo sapiens RAB15, member RAS oncogene family (RAB15), mRNA."	RefSeq	3.4616	3.65997	-3.35693	-1.1474	0.008495	0.00432	down
TC11000203.hg.1	TEAD1	NM_021961	"Homo sapiens TEA domain family member 1 (SV40 transcriptional enhancer factor) (TEAD1), mRNA."	RefSeq	5.98675	6.18495	-2.14933	-1.14726	0.029023	0.026443	down
TC20000114.hg.1	MGME1	NM_052865	"Homo sapiens mitochondrial genome maintenance exonuclease 1 (MGME1), nuclear gene encoding mitochondrial protein, mRNA."	RefSeq	3.44953	3.64772	-1.77423	-1.14726	0.050423	0.042387	down
TC12001430.hg.1	AMIGO2	NM_001143668	"Homo sapiens adhesion molecule with Ig-like domain 2 (AMIGO2), transcript variant 1, mRNA."	RefSeq	2.23148	2.42963	-2.08569	-1.14722	0.031525	0.026443	down
TC10001201.hg.1	HNRNPF	NM_001098208	"Homo sapiens heterogeneous nuclear ribonucleoprotein F (HNRNPF), transcript variant 1, mRNA."	RefSeq	6.15912	6.35694	-1.62997	-1.14697	0.063491	0.064129	down
TC10001403.hg.1	ECD	NM_001135752	"Homo sapiens ecdysoneless homolog (Drosophila) (ECD), transcript variant 2, mRNA."	RefSeq	5.58108	5.7789	-2.59176	-1.14696	0.017253	0.011282	down
TC0X000619.hg.1	UTP14A	NM_001166221	"Homo sapiens UTP14, U3 small nucleolar ribonucleoprotein, homolog A (yeast) (UTP14A), transcript variant 2, mRNA."	RefSeq	3.84695	4.04453	-2.27519	-1.14677	0.024465	0.017021	down
TC18000538.hg.1	ATP8B1	NM_005603	"Homo sapiens ATPase, aminophospholipid transporter, class I, type 8B, member 1 (ATP8B1), mRNA."	RefSeq	5.52381	5.72137	-1.52943	-1.14676	0.075299	0.064129	down
TC0X000382.hg.1	MED12	NM_005120	"Homo sapiens mediator complex subunit 12 (MED12), mRNA."	RefSeq	2.94832	3.14575	-5.17498	-1.14666	0.002498	0	down
TC12001824.hg.1	CCDC41	NM_001042399	"Homo sapiens coiled-coil domain containing 41 (CCDC41), transcript variant 2, mRNA."	RefSeq	1.8369	2.03432	-2.49939	-1.14665	0.018966	0.017021	down
TC12000286.hg.1	DDX11	NM_152438	"Homo sapiens DEAD/H (Asp-Glu-Ala-Asp/His) box helicase 11 (DDX11), transcript variant 3, mRNA."	RefSeq	3.29026	3.48761	-2.87216	-1.1466	0.013065	0.007304	down
TC17001876.hg.1	SLC25A19	NM_001126121	"Homo sapiens solute carrier family 25 (mitochondrial thiamine pyrophosphate carrier), member 19 (SLC25A19), nuclear gene encoding mitochondrial protein, transcript variant 1, mRNA."	RefSeq	2.45331	2.65018	-1.71918	-1.14621	0.054892	0.042387	down
TC08001462.hg.1	NIPAL2	NM_024759	"Homo sapiens NIPA-like domain containing 2 (NIPAL2), mRNA."	RefSeq	2.08241	2.27922	-2.46659	-1.14617	0.019685	0.017021	down
TC0X000886.hg.1	RBBP7	NM_001198719	"Homo sapiens retinoblastoma binding protein 7 (RBBP7), transcript variant 1, mRNA."	RefSeq	5.09596	5.29269	-2.61799	-1.14609	0.016661	0.011282	down
TC12001886.hg.1	CCDC53	NM_016053	"Homo sapiens coiled-coil domain containing 53 (CCDC53), mRNA."	RefSeq	4.66174	4.85841	-2.18295	-1.14605	0.027871	0.026443	down
TC03002141.hg.1	ACAP2	NM_012287	"Homo sapiens ArfGAP with coiled-coil, ankyrin repeat and PH domains 2 (ACAP2), mRNA."	RefSeq	3.66459	3.86126	-2.39572	-1.14605	0.021162	0.017021	down
TC17002862.hg.1	CHRNB1	NM_000747	"Homo sapiens cholinergic receptor, nicotinic, beta 1 (muscle) (CHRNB1), mRNA."	RefSeq	3.58254	3.77917	-3.73977	-1.14602	0.006299	0.002462	down
TC12000818.hg.1	C12orf75	NM_001145199	"Homo sapiens chromosome 12 open reading frame 75 (C12orf75), mRNA."	RefSeq	3.07554	3.27208	-1.82716	-1.14595	0.046407	0.042387	down
TC01002569.hg.1	GUCA2A	NM_033553	"Homo sapiens guanylate cyclase activator 2A (guanylin) (GUCA2A), mRNA."	RefSeq	2.3273	2.52372	-1.08182	-1.14586	0.174758	0.270995	down
TC06004053.hg.1	SNX14	NM_020468	"Homo sapiens sorting nexin 14 (SNX14), transcript variant 2, mRNA."	RefSeq	5.50961	5.70584	-1.61487	-1.1457	0.065191	0.064129	down
TC01000964.hg.1	RBM15	NM_001201545	"Homo sapiens RNA binding motif protein 15 (RBM15), transcript variant 2, mRNA."	RefSeq	2.63981	2.83598	-1.85035	-1.14566	0.044815	0.042387	down
TC10001423.hg.1	AP3M1	NM_012095	"Homo sapiens adaptor-related protein complex 3, mu 1 subunit (AP3M1), transcript variant 2, mRNA."	RefSeq	6.20483	6.40089	-1.85055	-1.14556	0.044796	0.042387	down
TC15002760.hg.1	ARHGAP11B	NM_001039841	"Homo sapiens Rho GTPase activating protein 11B (ARHGAP11B), mRNA."	RefSeq	5.16378	5.35983	-2.16893	-1.14556	0.028355	0.026443	down
TC0X001137.hg.1	ERCC6L	NM_017669	"Homo sapiens excision repair cross-complementing rodent repair deficiency, complementation group 6-like (ERCC6L), mRNA."	RefSeq	2.60953	2.80553	-1.58311	-1.14552	0.06894	0.064129	down
TC08001282.hg.1	PDE7A	NM_001242318	"Homo sapiens phosphodiesterase 7A (PDE7A), transcript variant 3, mRNA."	RefSeq	1.84934	2.0453	-3.93534	-1.14549	0.005477	0.001624	down
TC09001068.hg.1	GNE	NM_001128227	"Homo sapiens glucosamine (UDP-N-acetyl)-2-epimerase/N-acetylmannosamine kinase (GNE), transcript variant 1, mRNA."	RefSeq	5.25664	5.4525	-1.20116	-1.14541	0.138609	0.178875	down
TC6_qbl_hap6000159.hg.1	LY6G6C	NM_025261	"Homo sapiens lymphocyte antigen 6 complex, locus G6C (LY6G6C), mRNA."	RefSeq	2.01705	2.21286	-2.69522	-1.14537	0.01535	0.011282	down
TC08000318.hg.1	GINS4	NM_032336	"Homo sapiens GINS complex subunit 4 (Sld5 homolog) (GINS4), mRNA."	RefSeq	2.44334	2.63915	-2.17061	-1.14537	0.02831	0.026443	down
TC10001228.hg.1	AGAP4	NM_133446	"Homo sapiens ArfGAP with GTPase domain, ankyrin repeat and PH domain 4 (AGAP4), mRNA."	RefSeq	4.8231	5.01884	-1.55801	-1.14531	0.071875	0.064129	down
TC12000461.hg.1	HNRNPA1	NM_002136	"Homo sapiens heterogeneous nuclear ribonucleoprotein A1 (HNRNPA1), transcript variant 1, mRNA."	RefSeq	8.58581	8.78152	-2.23154	-1.14529	0.025834	0.017021	down
TC03001496.hg.1	DENND6A	NM_152678	"Homo sapiens DENN/MADD domain containing 6A (DENND6A), mRNA."	RefSeq	3.9289	4.12457	-2.73633	-1.14525	0.014854	0.011282	down
TC01003983.hg.1	TARBP1	NM_005646	"Homo sapiens TAR (HIV-1) RNA binding protein 1 (TARBP1), mRNA."	RefSeq	1.85251	2.0481	-2.48991	-1.14519	0.019169	0.017021	down
TC01003751.hg.1	NUCKS1	NM_022731	"Homo sapiens nuclear casein kinase and cyclin-dependent kinase substrate 1 (NUCKS1), mRNA."	RefSeq	7.01685	7.21242	-1.5881	-1.14517	0.068259	0.064129	down
TC02001194.hg.1	CARF	NM_001104586	"Homo sapiens amyotrophic lateral sclerosis 2 (juvenile) chromosome region, candidate 8 (ALS2CR8), mRNA."	RefSeq	1.69788	1.89323	-2.84326	-1.14501	0.013479	0.007304	down
TC01001752.hg.1	DIEXF	NM_014388	"Homo sapiens digestive organ expansion factor homolog (zebrafish) (DIEXF), mRNA."	RefSeq	2.32342	2.5186	-1.78971	-1.14486	0.049271	0.042387	down
TC01003273.hg.1	ILF2	NM_004515	"Homo sapiens interleukin enhancer binding factor 2 (ILF2), transcript variant 1, mRNA."	RefSeq	7.7287	7.9238	-1.78029	-1.1448	0.050003	0.042387	down
TC17_ctg5_hap1000004.hg.1	ARL17B	NM_001039083	"Homo sapiens ADP-ribosylation factor-like 17B (ARL17B), transcript variant 1, mRNA."	RefSeq	3.07869	3.27367	-3.16272	-1.14471	0.010041	0.00432	down
TC08000938.hg.1	SGK223	NM_001080826	"Homo sapiens homolog of rat pragma of Rnd2 (SGK223), mRNA."	RefSeq	5.70001	5.89498	-1.35008	-1.1447	0.104306	0.103127	down
TC05000551.hg.1	COMMD10	NM_016144	"Homo sapiens COMM domain containing 10 (COMMD10), mRNA."	RefSeq	1.83369	2.0286	-4.39985	-1.14465	0.004039	0.001369	down
TC13000663.hg.1	KPNA3	NM_002267	"Homo sapiens karyopherin alpha 3 (importin alpha 4) (KPNA3), mRNA."	RefSeq	5.66846	5.86321	-2.00553	-1.14452	0.035503	0.026443	down
TC17000315.hg.1	NLK	NM_016231	"Homo sapiens nemo-like kinase (NLK), mRNA."	RefSeq	4.27673	4.4714	-1.65493	-1.14446	0.060799	0.064129	down
TC07001134.hg.1	ZNF12	NM_006956	"Homo sapiens zinc finger protein 12 (ZNF12), transcript variant 2, mRNA."	RefSeq	3.82956	4.02384	-3.85849	-1.14415	0.00577	0.002462	down
TC6_qbl_hap6000101.hg.1	KIFC1	NM_002263	"Homo sapiens kinesin family member C1 (KIFC1), mRNA."	RefSeq	4.0722	4.26642	-1.6897	-1.14411	0.057451	0.064129	down
TC06000514.hg.1	PPARD	NM_006238	"Homo sapiens peroxisome proliferator-activated receptor delta (PPARD), transcript variant 1, mRNA."	RefSeq	4.10829	4.30241	-1.98848	-1.14403	0.036407	0.026443	down
TC05001233.hg.1	MTMR12	NM_001040446	"Homo sapiens myotubularin related protein 12 (MTMR12), mRNA."	RefSeq	4.10142	4.29533	-1.58283	-1.14386	0.068978	0.064129	down
TC02001205.hg.1	PARD3B	NM_057177	"Homo sapiens par-3 partitioning defective 3 homolog B (C. elegans) (PARD3B), transcript variant c, mRNA."	RefSeq	2.02657	2.22047	-2.96254	-1.14385	0.011894	0.007304	down
TC02000748.hg.1	INSIG2	NM_016133	"Homo sapiens insulin induced gene 2 (INSIG2), mRNA."	RefSeq	4.23296	4.42681	-1.87701	-1.14381	0.042849	0.042387	down
TC18000552.hg.1	PIGN	NM_012327	"Homo sapiens phosphatidylinositol glycan anchor biosynthesis, class N (PIGN), transcript variant 2, mRNA."	RefSeq	3.85053	4.04435	-1.45283	-1.14378	0.086216	0.103127	down
TC02002859.hg.1	NCL	NM_005381	"Homo sapiens nucleolin (NCL), mRNA."	RefSeq	7.26991	7.46359	-2.50351	-1.14368	0.018864	0.011282	down
TC08000332.hg.1	SGK196	NM_032237	"Homo sapiens protein kinase-like protein SgK196 (SGK196), mRNA."	RefSeq	4.32588	4.51953	-2.54433	-1.14366	0.018081	0.011282	down
TC06000779.hg.1	NT5E	NM_001204813	"Homo sapiens 5'-nucleotidase, ecto (CD73) (NT5E), transcript variant 2, mRNA."	RefSeq	7.66957	7.8631	-2.18416	-1.14356	0.027813	0.026443	down
TC07003302.hg.1	THAP5	NM_001130475	"Homo sapiens THAP domain containing 5 (THAP5), transcript variant 1, mRNA."	RefSeq	2.85277	3.04627	-2.04737	-1.14353	0.033294	0.026443	down
TC05000377.hg.1	AGGF1	NM_018046	"Homo sapiens angiogenic factor with G patch and FHA domains 1 (AGGF1), mRNA."	RefSeq	4.0385	4.23199	-1.84125	-1.14353	0.045477	0.042387	down
TC16000671.hg.1	FOXL1	NM_005250	"Homo sapiens forkhead box L1 (FOXL1), mRNA."	RefSeq	2.23505	2.4285	-1.45163	-1.14349	0.086407	0.103127	down
TC02001592.hg.1	NBAS	NM_015909	"Homo sapiens neuroblastoma amplified sequence (NBAS), transcript variant 1, mRNA."	RefSeq	4.53193	4.72533	-2.63188	-1.14345	0.016388	0.011282	down
TC6_apd_hap1000061.hg.1	ZFP57	BC157878	"Homo sapiens zinc finger protein 57 homolog (mouse), mRNA (cDNA clone MGC:189704 IMAGE:8862701), complete cds."	GenBank	1.71939	1.91277	-1.37573	-1.14344	0.099208	0.103127	down
TC07001065.hg.1	WDR60	NM_018051	"Homo sapiens WD repeat domain 60 (WDR60), mRNA."	RefSeq	2.18803	2.38141	-2.37068	-1.14344	0.021722	0.017021	down
TC16002074.hg.1	MT1M	NM_176870	"Homo sapiens metallothionein 1M (MT1M), mRNA."	RefSeq	2.68183	2.87507	-1.68198	-1.14333	0.058227	0.064129	down
TC15001264.hg.1	ZNF106	NM_022473	"Homo sapiens zinc finger protein 106 (ZNF106), mRNA."	RefSeq	4.47509	4.66827	-2.08364	-1.14329	0.031595	0.026443	down
TC07001505.hg.1	ABHD11	NM_001145364	"Homo sapiens abhydrolase domain containing 11 (ABHD11), nuclear gene encoding mitochondrial protein, transcript variant 8, mRNA."	RefSeq	3.00758	3.20056	-3.28968	-1.14312	0.008991	0.00432	down
TC03000853.hg.1	TIPARP	NM_001184717	"Homo sapiens TCDD-inducible poly(ADP-ribose) polymerase (TIPARP), transcript variant 1, mRNA."	RefSeq	3.49037	3.68334	-2.32593	-1.14311	0.022855	0.017021	down
TC17000970.hg.1	ABR	NM_001159746	"Homo sapiens active BCR-related (ABR), transcript variant 3, mRNA."	RefSeq	4.39507	4.58793	-2.98331	-1.14303	0.011665	0.007304	down
TC10001279.hg.1	AGAP8	NM_001077686	"Homo sapiens ArfGAP with GTPase domain, ankyrin repeat and PH domain 8 (AGAP8), transcript variant 2, mRNA."	RefSeq	3.70302	3.89579	-2.10473	-1.14296	0.030678	0.026443	down
TC12001620.hg.1	STAT6	NM_001178078	"Homo sapiens signal transducer and activator of transcription 6, interleukin-4 induced (STAT6), transcript variant 1, mRNA."	RefSeq	4.99465	5.18721	-2.84391	-1.14278	0.01346	0.007304	down
TC04001430.hg.1	MANBA	NM_005908	"Homo sapiens mannosidase, beta A, lysosomal (MANBA), mRNA."	RefSeq	4.7707	4.96317	-2.05583	-1.14272	0.032899	0.026443	down
TC09000509.hg.1	STX17	NM_017919	"Homo sapiens syntaxin 17 (STX17), mRNA."	RefSeq	4.15044	4.3429	-2.68252	-1.14271	0.015541	0.011282	down
TC06001079.hg.1	SUMO4	NM_001002255	"Homo sapiens SMT3 suppressor of mif two 3 homolog 4 (S. cerevisiae) (SUMO4), mRNA."	RefSeq	3.87153	4.06395	-1.49957	-1.14268	0.079468	0.064129	down
TC05000682.hg.1	TGFBI	NM_000358	"Homo sapiens transforming growth factor, beta-induced, 68kDa (TGFBI), mRNA."	RefSeq	6.69295	6.88535	-1.55875	-1.14267	0.071805	0.064129	down
TC08001205.hg.1	PCMTD1	NM_052937	"Homo sapiens protein-L-isoaspartate (D-aspartate) O-methyltransferase domain containing 1 (PCMTD1), mRNA."	RefSeq	2.67018	2.86258	-2.66791	-1.14266	0.015827	0.011282	down
TC01002282.hg.1		ENST00000356370	[retired] cdna:known chromosome:GRCh37:1:17196254:17198668:-1 gene:ENSG00000196690 gene_biotype:protein_coding transcript_biotype:protein_coding	ENSEMBL	1.61631	1.80863	-0.792109	-1.1426	0.310777	0.326898	down
TC11000337.hg.1	FJX1	NM_014344	"Homo sapiens four jointed box 1 (Drosophila) (FJX1), mRNA."	RefSeq	2.64186	2.83408	-1.42658	-1.14252	0.090614	0.103127	down
TC16001090.hg.1	ITFG1	NM_030790	"Homo sapiens integrin alpha FG-GAP repeat containing 1 (ITFG1), mRNA."	RefSeq	5.0898	5.28196	-3.37309	-1.14247	0.008425	0.00432	down
TC12001670.hg.1	C12orf66	NM_152440	"Homo sapiens chromosome 12 open reading frame 66 (C12orf66), mRNA."	RefSeq	2.70107	2.8931	-1.94086	-1.14237	0.038857	0.042387	down
TC16001133.hg.1	NUDT21	NM_007006	"Homo sapiens nudix (nucleoside diphosphate linked moiety X)-type motif 21 (NUDT21), mRNA."	RefSeq	7.52077	7.71278	-2.87023	-1.14236	0.013103	0.007304	down
TC01001539.hg.1	RASAL2	NM_004841	"Homo sapiens RAS protein activator like 2 (RASAL2), transcript variant 1, mRNA."	RefSeq	2.05859	2.25057	-2.42575	-1.14232	0.020442	0.017021	down
TC08000225.hg.1	HMBOX1	NM_001135726	"Homo sapiens homeobox containing 1 (HMBOX1), transcript variant 2, mRNA."	RefSeq	3.35297	3.54489	-2.09606	-1.14228	0.031073	0.026443	down
TC17001519.hg.1	KLHL11	NM_018143	"Homo sapiens kelch-like family member 11 (KLHL11), mRNA."	RefSeq	2.50125	2.69309	-2.29077	-1.14222	0.02395	0.017021	down
TC03000851.hg.1	GMPS	NM_003875	"Homo sapiens guanine monphosphate synthetase (GMPS), mRNA."	RefSeq	6.87341	7.06503	-2.19744	-1.14204	0.02726	0.026443	down
TC06001679.hg.1	PPIL1	NM_016059	"Homo sapiens peptidylprolyl isomerase (cyclophilin)-like 1 (PPIL1), mRNA."	RefSeq	4.32862	4.52024	-1.82304	-1.14204	0.046712	0.042387	down
TC06000421.hg.1	KIFC1	NM_002263	"Homo sapiens kinesin family member C1 (KIFC1), mRNA."	RefSeq	4.07371	4.26532	-1.56837	-1.14204	0.070719	0.064129	down
TC6_ssto_hap7000090.hg.1	KIFC1	NM_002263	"Homo sapiens kinesin family member C1 (KIFC1), mRNA."	RefSeq	4.07371	4.26532	-1.56837	-1.14204	0.070719	0.064129	down
TC22000385.hg.1	ATXN10	NM_001167621	"Homo sapiens ataxin 10 (ATXN10), transcript variant 2, mRNA."	RefSeq	4.47505	4.6666	-2.68623	-1.14199	0.015465	0.011282	down
TC04001805.hg.1	IRF2	NM_002199	"Homo sapiens interferon regulatory factor 2 (IRF2), mRNA."	RefSeq	4.22263	4.41414	-3.19845	-1.14196	0.009729	0.00432	down
TC15000611.hg.1	DIS3L	NM_001143688	"Homo sapiens DIS3 mitotic control homolog (S. cerevisiae)-like (DIS3L), transcript variant 1, mRNA."	RefSeq	3.16227	3.35352	-1.41571	-1.14175	0.092416	0.103127	down
TC14001022.hg.1	EGLN3	NM_022073	"Homo sapiens egl nine homolog 3 (C. elegans) (EGLN3), mRNA."	RefSeq	2.56861	2.75968	-1.44489	-1.14161	0.087495	0.103127	down
TC08000518.hg.1	FABP5	NM_001444	"Homo sapiens fatty acid binding protein 5 (psoriasis-associated) (FABP5), mRNA."	RefSeq	1.86694	2.05784	-2.2384	-1.14148	0.025617	0.017021	down
TC12000272.hg.1	KLHL42	NM_020782	"Homo sapiens kelch-like family member 42 (KLHL42), mRNA."	RefSeq	3.58023	3.77113	-1.67243	-1.14148	0.059271	0.064129	down
TC16000986.hg.1	EIF3CL	NM_001099661	"Homo sapiens eukaryotic translation initiation factor 3, subunit C-like (EIF3CL), mRNA."	RefSeq	8.06551	8.25638	-2.5195	-1.14145	0.018577	0.011282	down
TC14000884.hg.1	TEP1	NM_007110	"Homo sapiens telomerase-associated protein 1 (TEP1), mRNA."	RefSeq	2.50345	2.69422	-2.5202	-1.14138	0.018565	0.011282	down
TC11001195.hg.1	ST14	NM_021978	"Homo sapiens suppression of tumorigenicity 14 (colon carcinoma) (ST14), mRNA."	RefSeq	5.81693	6.00759	-3.25781	-1.14128	0.009208	0.00432	down
TC08001334.hg.1	JPH1	NM_020647	"Homo sapiens junctophilin 1 (JPH1), mRNA."	RefSeq	4.05241	4.24298	-1.94679	-1.14121	0.038539	0.026443	down
TC12000305.hg.1	ALG10B	NM_001013620	"Homo sapiens ALG10B, alpha-1,2-glucosyltransferase (ALG10B), mRNA."	RefSeq	1.74082	1.93117	-2.41126	-1.14104	0.020805	0.017021	down
TC17001734.hg.1	MTMR4	NM_004687	"Homo sapiens myotubularin related protein 4 (MTMR4), mRNA."	RefSeq	4.7675	4.95775	-2.30125	-1.14096	0.023587	0.017021	down
TC14000294.hg.1	TMX1	NM_030755	"Homo sapiens thioredoxin-related transmembrane protein 1 (TMX1), mRNA."	RefSeq	5.80454	5.99469	-2.0917	-1.14088	0.031251	0.026443	down
TC01001522.hg.1	RABGAP1L	NM_001035230	"Homo sapiens RAB GTPase activating protein 1-like (RABGAP1L), transcript variant 2, mRNA."	RefSeq	1.75285	1.94293	-3.20883	-1.14083	0.009634	0.00432	down
TC06002217.hg.1	LRP11	NM_032832	"Homo sapiens low density lipoprotein receptor-related protein 11 (LRP11), mRNA."	RefSeq	4.14666	4.33666	-2.58614	-1.14077	0.017362	0.011282	down
TC11000325.hg.1	NAT10	NM_001144030	"Homo sapiens N-acetyltransferase 10 (GCN5-related) (NAT10), transcript variant 2, mRNA."	RefSeq	5.24384	5.43371	-1.63556	-1.14067	0.062855	0.064129	down
TC0X001186.hg.1	RPS6KA6	NM_014496	"Homo sapiens ribosomal protein S6 kinase, 90kDa, polypeptide 6 (RPS6KA6), mRNA."	RefSeq	1.58496	1.77483	-2.82105	-1.14066	0.013784	0.007304	down
TC06004112.hg.1	GABBR1	NM_001470	"Homo sapiens gamma-aminobutyric acid (GABA) B receptor, 1 (GABBR1), transcript variant 1, mRNA."	RefSeq	2.70286	2.89261	-3.92713	-1.14056	0.005509	0.001624	down
TC01001149.hg.1	PPIAL4D	NM_001164261	"Homo sapiens peptidylprolyl isomerase A (cyclophilin A)-like 4D (PPIAL4D), mRNA."	RefSeq	2.33666	2.52636	-1.62684	-1.14052	0.063806	0.064129	down
TC01003149.hg.1	PPIAL4D	NM_001164261	"Homo sapiens peptidylprolyl isomerase A (cyclophilin A)-like 4D (PPIAL4D), mRNA."	RefSeq	2.33666	2.52636	-1.62684	-1.14052	0.063806	0.064129	down
TC05001819.hg.1	HNRNPA0	NM_006805	"Homo sapiens heterogeneous nuclear ribonucleoprotein A0 (HNRNPA0), mRNA."	RefSeq	5.47856	5.66816	-1.98972	-1.14045	0.036337	0.026443	down
TC20000293.hg.1	FAM83D	NM_030919	"Homo sapiens family with sequence similarity 83, member D (FAM83D), mRNA."	RefSeq	3.51881	3.70828	-2.53661	-1.14034	0.018221	0.011282	down
TC07001169.hg.1	SNX13	NM_015132	"Homo sapiens sorting nexin 13 (SNX13), mRNA."	RefSeq	3.73497	3.92429	-2.11793	-1.14022	0.030188	0.026443	down
TC11000316.hg.1	HIPK3	NM_001048200	"Homo sapiens homeodomain interacting protein kinase 3 (HIPK3), transcript variant 3, mRNA."	RefSeq	5.33682	5.52591	-1.89642	-1.14004	0.041588	0.042387	down
TC12000326.hg.1	TMEM117	NM_032256	"Homo sapiens transmembrane protein 117 (TMEM117), mRNA."	RefSeq	2.42597	2.61506	-1.93745	-1.14004	0.039093	0.042387	down
TC09000119.hg.1	IFT74	NM_001099222	"Homo sapiens intraflagellar transport 74 homolog (Chlamydomonas) (IFT74), transcript variant 2, mRNA."	RefSeq	2.16114	2.3501	-2.4282	-1.13994	0.020385	0.017021	down
TC02000289.hg.1	TTC7A	NM_020458	"Homo sapiens tetratricopeptide repeat domain 7A (TTC7A), mRNA."	RefSeq	3.66386	3.85274	-5.34926	-1.13988	0.002237	0	down
TC16000561.hg.1	TANGO6	NM_024562	"Homo sapiens transport and golgi organization 6 homolog (Drosophila) (TANGO6), mRNA."	RefSeq	2.09879	2.28767	-2.0879	-1.13987	0.031435	0.026443	down
TC04001719.hg.1	DDX60L	NM_001012967	"Homo sapiens DEAD (Asp-Glu-Ala-Asp) box polypeptide 60-like (DDX60L), mRNA."	RefSeq	1.58496	1.77359	-2.14394	-1.13968	0.029239	0.026443	down
TC07000679.hg.1	KMT2E	NM_018682	"Homo sapiens myeloid/lymphoid or mixed-lineage leukemia 5 (trithorax homolog, Drosophila) (MLL5), transcript variant 2, mRNA."	RefSeq	4.43822	4.62656	-1.56944	-1.13945	0.07057	0.064129	down
TC05000979.hg.1	SFXN1	NM_022754	"Homo sapiens sideroflexin 1 (SFXN1), mRNA."	RefSeq	4.61282	4.80098	-2.67436	-1.13931	0.015726	0.011282	down
TC03001421.hg.1	MST1R	NM_001244937	"Homo sapiens macrophage stimulating 1 receptor (c-met-related tyrosine kinase) (MST1R), transcript variant 2, mRNA."	RefSeq	4.43565	4.6237	-3.19413	-1.13923	0.009793	0.00432	down
TC11000975.hg.1		ENST00000398067	cdna:novel chromosome:GRCh37:11:107650219:107652316:1 gene:ENSG00000214305 gene_biotype:protein_coding transcript_biotype:protein_coding	ENSEMBL	9.43517	9.62316	-3.60042	-1.13918	0.007088	0.002462	down
TC13000534.hg.1	HMGB1	NM_002128	"Homo sapiens high mobility group box 1 (HMGB1), mRNA."	RefSeq	5.51738	5.70523	-2.19396	-1.13907	0.027432	0.026443	down
TC6_apd_hap1000079.hg.1	DDX39B	NM_004640	"Homo sapiens DEAD (Asp-Glu-Ala-Asp) box polypeptide 39B (DDX39B), transcript variant 1, mRNA."	RefSeq	7.37244	7.56006	-2.81724	-1.13888	0.013829	0.007304	down
TC05001538.hg.1	DHFR	NM_000791	"Homo sapiens dihydrofolate reductase (DHFR), mRNA."	RefSeq	5.88113	6.06854	-2.40937	-1.13872	0.020907	0.017021	down
TC17000532.hg.1	TUBG2	NM_016437	"Homo sapiens tubulin, gamma 2 (TUBG2), mRNA."	RefSeq	4.73976	4.92713	-1.64247	-1.13869	0.062212	0.064129	down
TC05000938.hg.1	RANBP17	NM_022897	"Homo sapiens RAN binding protein 17 (RANBP17), mRNA."	RefSeq	1.85607	2.0433	-2.88703	-1.13857	0.012868	0.007304	down
TC19000400.hg.1	ZNF492	NM_020855	"Homo sapiens zinc finger protein 492 (ZNF492), mRNA."	RefSeq	1.74449	1.93158	-1.87298	-1.13846	0.043084	0.042387	down
TC14001316.hg.1	ACYP1	NM_001107	"Homo sapiens acylphosphatase 1, erythrocyte (common) type (ACYP1), transcript variant 1, mRNA."	RefSeq	2.00832	2.1953	-2.38713	-1.13838	0.02134	0.017021	down
TC07001734.hg.1	PUS7	NM_019042	"Homo sapiens pseudouridylate synthase 7 homolog (S. cerevisiae) (PUS7), mRNA."	RefSeq	3.27764	3.46461	-2.5961	-1.13837	0.01712	0.011282	down
TC01002659.hg.1	ZCCHC11	NM_001009881	"Homo sapiens zinc finger, CCHC domain containing 11 (ZCCHC11), transcript variant 1, mRNA."	RefSeq	2.3586	2.54557	-2.21098	-1.13837	0.026623	0.026443	down
TC03003360.hg.1	PPP4R2	NM_174907	"Homo sapiens protein phosphatase 4, regulatory subunit 2 (PPP4R2), mRNA."	RefSeq	4.76979	4.95674	-2.8115	-1.13836	0.013905	0.007304	down
TC05000281.hg.1	SREK1	NM_001077199	"Homo sapiens splicing regulatory glutamine/lysine-rich protein 1 (SREK1), transcript variant 1, mRNA."	RefSeq	3.21616	3.40306	-1.50046	-1.13832	0.07936	0.064129	down
TC12000749.hg.1	NEDD1	NM_001135175	"Homo sapiens neural precursor cell expressed, developmentally down-regulated 1 (NEDD1), transcript variant 1, mRNA."	RefSeq	5.56459	5.75137	-2.37468	-1.13822	0.021639	0.017021	down
TC10000002.hg.1	ZMYND11	NM_001202464	"Homo sapiens zinc finger, MYND-type containing 11 (ZMYND11), transcript variant 4, mRNA."	RefSeq	4.55815	4.74491	-2.24409	-1.1382	0.025426	0.017021	down
TC02002244.hg.1	CCDC93	NM_019044	"Homo sapiens coiled-coil domain containing 93 (CCDC93), mRNA."	RefSeq	3.37188	3.55844	-2.19741	-1.13804	0.027266	0.026443	down
TC01000378.hg.1	MED18	NM_001127350	"Homo sapiens mediator complex subunit 18 (MED18), transcript variant 2, mRNA."	RefSeq	2.66061	2.84707	-2.02568	-1.13797	0.034465	0.026443	down
TC11002413.hg.1	MSANTD2	NM_024631	"Homo sapiens Myb/SANT-like DNA-binding domain containing 2 (MSANTD2), mRNA."	RefSeq	2.30389	2.49024	-1.60783	-1.13788	0.065974	0.064129	down
TC12000925.hg.1	RFC5	NM_001130112	"Homo sapiens replication factor C (activator 1) 5, 36.5kDa (RFC5), transcript variant 4, mRNA."	RefSeq	5.24301	5.42932	-2.20805	-1.13785	0.02677	0.026443	down
TC06001302.hg.1	DEK	NM_001134709	"Homo sapiens DEK oncogene (DEK), transcript variant 2, mRNA."	RefSeq	6.28082	6.46709	-1.8651	-1.13783	0.043638	0.042387	down
TC04000331.hg.1	PAICS	NM_006452	"Homo sapiens phosphoribosylaminoimidazole carboxylase, phosphoribosylaminoimidazole succinocarboxamide synthetase (PAICS), transcript variant 2, mRNA."	RefSeq	6.11689	6.30311	-3.10642	-1.13778	0.010468	0.007304	down
TC17001698.hg.1	TOB1	NM_001243877	"Homo sapiens transducer of ERBB2, 1 (TOB1), transcript variant 2, mRNA."	RefSeq	3.73296	3.91903	-2.27711	-1.13766	0.024363	0.017021	down
TC01002945.hg.1	HENMT1	NM_001102592	"Homo sapiens HEN1 methyltransferase homolog 1 (Arabidopsis) (HENMT1), transcript variant 2, mRNA."	RefSeq	2.63964	2.82569	-3.56557	-1.13765	0.007247	0.002462	down
TC07001219.hg.1	HOXA2	NM_006735	"Homo sapiens homeobox A2 (HOXA2), mRNA."	RefSeq	1.61298	1.79887	-1.5256	-1.13751	0.075745	0.064129	down
TC14001056.hg.1	FOXA1	NM_004496	"Homo sapiens forkhead box A1 (FOXA1), mRNA."	RefSeq	4.65609	4.84194	-2.3953	-1.13749	0.021168	0.017021	down
TC02001753.hg.1	ATL2	NM_001135673	"Homo sapiens atlastin GTPase 2 (ATL2), transcript variant 2, mRNA."	RefSeq	5.969	6.15468	-2.19209	-1.13735	0.02754	0.026443	down
TC16000315.hg.1		ENST00000424293	cdna:novel chromosome:GRCh37:16:29049923:29064047:1 gene:ENSG00000196796 gene_biotype:protein_coding transcript_biotype:protein_coding	ENSEMBL	5.64294	5.82847	-1.79319	-1.13723	0.048959	0.042387	down
TC09001340.hg.1	BICD2	NM_001003800	"Homo sapiens bicaudal D homolog 2 (Drosophila) (BICD2), transcript variant 1, mRNA."	RefSeq	3.0523	3.23772	-2.18232	-1.13715	0.02789	0.026443	down
TC03001988.hg.1	PHC3	NM_024947	"Homo sapiens polyhomeotic homolog 3 (Drosophila) (PHC3), mRNA."	RefSeq	4.64857	4.83392	-3.37753	-1.13709	0.008418	0.00432	down
TC21001062.hg.1	MORC3	NM_015358	"Homo sapiens MORC family CW-type zinc finger 3 (MORC3), mRNA."	RefSeq	2.77844	2.96353	-2.14534	-1.13689	0.029195	0.026443	down
TC10000113.hg.1	SUV39H2	NM_024670	"Homo sapiens suppressor of variegation 3-9 homolog 2 (Drosophila) (SUV39H2), transcript variant 3, mRNA."	RefSeq	2.88232	3.06731	-2.2229	-1.13682	0.026101	0.017021	down
TC12001470.hg.1	TUBA1B	NM_006082	"Homo sapiens tubulin, alpha 1b (TUBA1B), mRNA."	RefSeq	9.98608	10.171	-1.81767	-1.13678	0.047107	0.042387	down
TC11001287.hg.1	NAP1L4	NM_005969	"Homo sapiens nucleosome assembly protein 1-like 4 (NAP1L4), mRNA."	RefSeq	5.31034	5.4951	-2.01574	-1.13662	0.034936	0.026443	down
TC12000392.hg.1	LARP4	NM_001170803	"Homo sapiens La ribonucleoprotein domain family, member 4 (LARP4), transcript variant 4, mRNA."	RefSeq	4.65793	4.8426	-2.0011	-1.13655	0.035821	0.026443	down
TC22000660.hg.1	MORC2	NM_014941	"Homo sapiens MORC family CW-type zinc finger 2 (MORC2), mRNA."	RefSeq	3.90861	4.09313	-2.82034	-1.13644	0.013791	0.007304	down
TC01003868.hg.1	AIDA	NM_022831	"Homo sapiens axin interactor, dorsalization associated (AIDA), mRNA."	RefSeq	5.47164	5.65598	-2.39309	-1.1363	0.021206	0.017021	down
TC15000732.hg.1	CHRNA5	NM_000745	"Homo sapiens cholinergic receptor, nicotinic, alpha 5 (neuronal) (CHRNA5), mRNA."	RefSeq	3.24444	3.42861	-1.65549	-1.13616	0.060729	0.064129	down
TC12001259.hg.1	HEBP1	NM_015987	"Homo sapiens heme binding protein 1 (HEBP1), mRNA."	RefSeq	5.11582	5.29996	-2.43381	-1.13614	0.020283	0.017021	down
TC01002891.hg.1	CNN3	NM_001839	"Homo sapiens calponin 3, acidic (CNN3), mRNA."	RefSeq	5.57352	5.75765	-2.63911	-1.13613	0.016241	0.011282	down
TC12001427.hg.1	SLC38A2	NM_018976	"Homo sapiens solute carrier family 38, member 2 (SLC38A2), mRNA."	RefSeq	8.23359	8.41772	-2.9715	-1.13613	0.011779	0.007304	down
TC08001052.hg.1	TNFRSF10A	NM_003844	"Homo sapiens tumor necrosis factor receptor superfamily, member 10a (TNFRSF10A), mRNA."	RefSeq	4.57136	4.75547	-3.82321	-1.13611	0.005878	0.002462	down
TC20000382.hg.1	ARFGEF2	NM_006420	"Homo sapiens ADP-ribosylation factor guanine nucleotide-exchange factor 2 (brefeldin A-inhibited) (ARFGEF2), mRNA."	RefSeq	4.91026	5.09433	-1.65719	-1.13609	0.060538	0.064129	down
TC07000672.hg.1	PMPCB	NM_004279	"Homo sapiens peptidase (mitochondrial processing) beta (PMPCB), nuclear gene encoding mitochondrial protein, mRNA."	RefSeq	4.63895	4.82254	-1.86651	-1.13571	0.043517	0.042387	down
TC20000294.hg.1	DHX35	NM_001190809	"Homo sapiens DEAH (Asp-Glu-Ala-His) box polypeptide 35 (DHX35), transcript variant 2, mRNA."	RefSeq	3.28811	3.47153	-2.17908	-1.13557	0.028004	0.026443	down
TC03001604.hg.1	DCBLD2	NM_080927	"Homo sapiens discoidin, CUB and LCCL domain containing 2 (DCBLD2), mRNA."	RefSeq	3.38736	3.57077	-2.62207	-1.13557	0.016604	0.011282	down
TC08002582.hg.1	FUT10	NM_032664	"Homo sapiens fucosyltransferase 10 (alpha (1,3) fucosyltransferase) (FUT10), mRNA."	RefSeq	2.76273	2.94611	-3.00016	-1.13554	0.011518	0.007304	down
TC17000548.hg.1	NBR1	NM_005899	"Homo sapiens neighbor of BRCA1 gene 1 (NBR1), transcript variant 1, mRNA."	RefSeq	4.21515	4.3985	-2.45828	-1.13552	0.019831	0.017021	down
TC01002985.hg.1	WDR77	NM_024102	"Homo sapiens WD repeat domain 77 (WDR77), mRNA."	RefSeq	3.9841	4.16742	-2.13269	-1.1355	0.029602	0.026443	down
TC03003342.hg.1	NPHP3	NM_153240	"Homo sapiens nephronophthisis 3 (adolescent) (NPHP3), mRNA."	RefSeq	2.00177	2.18506	-2.36671	-1.13546	0.021805	0.017021	down
TC01001586.hg.1	SMG7	NM_001174061	"Homo sapiens smg-7 homolog, nonsense mediated mRNA decay factor (C. elegans) (SMG7), transcript variant 5, mRNA."	RefSeq	4.01596	4.19917	-2.69201	-1.1354	0.01542	0.011282	down
TC04000905.hg.1	ANKRD37	NM_181726	"Homo sapiens ankyrin repeat domain 37 (ANKRD37), mRNA."	RefSeq	3.1591	3.34225	-1.4008	-1.13536	0.094936	0.103127	down
TC13000193.hg.1	FNDC3A	NM_001079673	"Homo sapiens fibronectin type III domain containing 3A (FNDC3A), transcript variant 1, mRNA."	RefSeq	4.41903	4.60213	-2.72266	-1.13532	0.015038	0.011282	down
TC01000981.hg.1	DDX20	NM_007204	"Homo sapiens DEAD (Asp-Glu-Ala-Asp) box polypeptide 20 (DDX20), mRNA."	RefSeq	2.33475	2.51783	-3.62363	-1.13531	0.006961	0.002462	down
TC16000985.hg.1	NPIPB6	ENST00000532254	cdna:novel chromosome:GRCh37:16:28353876:28374829:-1 gene:ENSG00000198156 gene_biotype:protein_coding transcript_biotype:protein_coding	ENSEMBL	3.91802	4.10098	-1.89889	-1.13521	0.041416	0.042387	down
TC14000940.hg.1	PRMT5	NM_001039619	"Homo sapiens protein arginine methyltransferase 5 (PRMT5), transcript variant 2, mRNA."	RefSeq	5.46048	5.64342	-1.93098	-1.13519	0.039532	0.042387	down
TC17001582.hg.1	GPATCH8	NM_001002909	"Homo sapiens G patch domain containing 8 (GPATCH8), transcript variant 1, mRNA."	RefSeq	5.13586	5.31862	-2.29181	-1.13505	0.023924	0.017021	down
TC6_apd_hap1000054.hg.1	ZNF311	NM_001010877	"Homo sapiens zinc finger protein 311 (ZNF311), mRNA."	RefSeq	1.93796	2.12055	-1.93479	-1.13491	0.03929	0.042387	down
TC6_dbb_hap3000104.hg.1	ZNF311	NM_001010877	"Homo sapiens zinc finger protein 311 (ZNF311), mRNA."	RefSeq	1.93796	2.12055	-1.93479	-1.13491	0.03929	0.042387	down
TC6_mann_hap4000094.hg.1	ZNF311	NM_001010877	"Homo sapiens zinc finger protein 311 (ZNF311), mRNA."	RefSeq	1.93796	2.12055	-1.93479	-1.13491	0.03929	0.042387	down
TC04000151.hg.1	LAP3	NM_015907	"Homo sapiens leucine aminopeptidase 3 (LAP3), mRNA."	RefSeq	3.09003	3.27261	-2.231	-1.13491	0.025847	0.017021	down
TC06001955.hg.1	GPR63	NM_001143957	"Homo sapiens G protein-coupled receptor 63 (GPR63), transcript variant 1, mRNA."	RefSeq	2.0793	2.26181	-2.82293	-1.13486	0.013733	0.007304	down
TC09000092.hg.1	DENND4C	NM_017925	"Homo sapiens DENN/MADD domain containing 4C (DENND4C), transcript variant 1, mRNA."	RefSeq	5.01303	5.19542	-1.09882	-1.13476	0.169265	0.178875	down
TC05000683.hg.1	SMAD5	NM_001001419	"Homo sapiens SMAD family member 5 (SMAD5), transcript variant 2, mRNA."	RefSeq	3.71138	3.89373	-1.62096	-1.13473	0.064472	0.064129	down
TC09001515.hg.1	TNFSF15	NM_001204344	"Homo sapiens tumor necrosis factor (ligand) superfamily, member 15 (TNFSF15), transcript variant 2, mRNA."	RefSeq	3.93558	4.1179	-1.74528	-1.13471	0.052728	0.042387	down
TC17000023.hg.1	SGSM2	NM_001098509	"Homo sapiens small G protein signaling modulator 2 (SGSM2), transcript variant 2, mRNA."	RefSeq	3.3965	3.57876	-4.61848	-1.13466	0.003479	0.001369	down
TC04001726.hg.1	C4orf27	NM_017867	"Homo sapiens chromosome 4 open reading frame 27 (C4orf27), mRNA."	RefSeq	2.99424	3.17644	-2.06343	-1.13461	0.032619	0.026443	down
TC02001012.hg.1	SP5	NM_001003845	"Homo sapiens Sp5 transcription factor (SP5), mRNA."	RefSeq	1.8559	2.03808	-1.06975	-1.1346	0.179099	0.270995	down
TC13000626.hg.1	NUFIP1	NM_012345	"Homo sapiens nuclear fragile X mental retardation protein interacting protein 1 (NUFIP1), mRNA."	RefSeq	2.45106	2.63321	-1.38659	-1.13457	0.097342	0.103127	down
TC15001620.hg.1	MYO9A	NM_006901	"Homo sapiens myosin IXA (MYO9A), mRNA."	RefSeq	2.64745	2.82958	-1.87964	-1.13455	0.042651	0.042387	down
TC11003442.hg.1	TRIM34	NM_001003827	"Homo sapiens tripartite motif containing 34 (TRIM34), transcript variant 4, mRNA."	RefSeq	2.04394	2.22597	-3.33335	-1.13448	0.008609	0.00432	down
TC18000258.hg.1	ZNF236	NM_007345	"Homo sapiens zinc finger protein 236 (ZNF236), mRNA."	RefSeq	2.95426	3.13628	-2.62702	-1.13447	0.016483	0.011282	down
TC17000691.hg.1	TOM1L1	NM_005486	"Homo sapiens target of myb1 (chicken)-like 1 (TOM1L1), mRNA."	RefSeq	6.57491	6.75682	-2.38706	-1.13438	0.021346	0.017021	down
TC03003369.hg.1	LMLN	NM_033029	"Homo sapiens leishmanolysin-like (metallopeptidase M8 family) (LMLN), transcript variant 2, mRNA."	RefSeq	1.93951	2.12136	-2.855	-1.13434	0.013313	0.007304	down
TC08000873.hg.1	LOC101060626	ENST00000523795	cdna:known chromosome:GRCh37:8:142091:150563:-1 gene:ENSG00000250210 gene_biotype:protein_coding transcript_biotype:protein_coding	ENSEMBL	1.78978	1.97149	-1.00004	-1.13423	0.205942	0.270995	down
TC01000493.hg.1	MACF1	NM_012090	"Homo sapiens microtubule-actin crosslinking factor 1 (MACF1), transcript variant 1, mRNA."	RefSeq	4.06436	4.24599	-1.67253	-1.13416	0.059239	0.064129	down
TC04000870.hg.1	SPCS3	NM_021928	"Homo sapiens signal peptidase complex subunit 3 homolog (S. cerevisiae) (SPCS3), mRNA."	RefSeq	4.12719	4.30879	-2.5053	-1.13414	0.018838	0.011282	down
TC15001491.hg.1	SLTM	NM_024755	"Homo sapiens SAFB-like, transcription modulator (SLTM), transcript variant 1, mRNA."	RefSeq	3.75175	3.93335	-1.45941	-1.13414	0.085216	0.103127	down
TC01000113.hg.1	H6PD	NM_004285	"Homo sapiens hexose-6-phosphate dehydrogenase (glucose 1-dehydrogenase) (H6PD), mRNA."	RefSeq	4.30081	4.48213	-2.39861	-1.13392	0.021104	0.017021	down
TC01006341.hg.1	DISP1	ENST00000360254	cdna:known chromosome:GRCh37:1:223045613:223153204:1 gene:ENSG00000154309 gene_biotype:protein_coding transcript_biotype:protein_coding	ENSEMBL	1.60828	1.78958	-2.02089	-1.1339	0.034714	0.026443	down
TC16000477.hg.1	NUP93	NM_001242795	"Homo sapiens nucleoporin 93kDa (NUP93), transcript variant 2, mRNA."	RefSeq	4.57935	4.76063	-1.87271	-1.1339	0.043109	0.042387	down
TC12000991.hg.1	GTF2H3	NM_001516	"Homo sapiens general transcription factor IIH, polypeptide 3, 34kDa (GTF2H3), transcript variant 1, mRNA."	RefSeq	5.20433	5.3856	-1.91673	-1.13388	0.04043	0.042387	down
TC04000500.hg.1	SMARCAD1	NM_001128429	"Homo sapiens SWI/SNF-related, matrix-associated actin-dependent regulator of chromatin, subfamily a, containing DEAD/H box 1 (SMARCAD1), transcript variant 1, mRNA."	RefSeq	2.33137	2.51257	-1.42716	-1.13383	0.090487	0.103127	down
TC09001282.hg.1	KIF27	NM_017576	"Homo sapiens kinesin family member 27 (KIF27), transcript variant 1, mRNA."	RefSeq	1.67616	1.85735	-2.64121	-1.13382	0.016197	0.011282	down
TC10000659.hg.1	KIF11	NM_004523	"Homo sapiens kinesin family member 11 (KIF11), mRNA."	RefSeq	5.75977	5.94089	-1.478	-1.13376	0.082365	0.064129	down
TC04001079.hg.1	GPR125	NM_145290	"Homo sapiens G protein-coupled receptor 125 (GPR125), mRNA."	RefSeq	3.56598	3.74708	-1.9361	-1.13375	0.039188	0.042387	down
TC18000452.hg.1	ZSCAN30	NM_001112734	"Homo sapiens zinc finger and SCAN domain containing 30 (ZSCAN30), mRNA."	RefSeq	1.82113	2.00216	-1.87974	-1.13369	0.042638	0.042387	down
TC0X000087.hg.1	SCML1	NM_001037535	"Homo sapiens sex comb on midleg-like 1 (Drosophila) (SCML1), transcript variant 3, mRNA."	RefSeq	1.63998	1.82099	-3.15841	-1.13367	0.010067	0.00432	down
TC01003200.hg.1	ANP32E	NM_030920	"Homo sapiens acidic (leucine-rich) nuclear phosphoprotein 32 family, member E (ANP32E), transcript variant 1, mRNA."	RefSeq	4.73649	4.91744	-2.36844	-1.13363	0.021779	0.017021	down
TC09001031.hg.1	KIF24	NM_194313	"Homo sapiens kinesin family member 24 (KIF24), mRNA."	RefSeq	2.57352	2.75444	-2.48665	-1.13361	0.019252	0.017021	down
TC02000967.hg.1	2017-03-07	NM_022826	"Homo sapiens membrane-associated ring finger (C3HC4) 7, E3 ubiquitin protein ligase (MARCH7), mRNA."	RefSeq	6.02951	6.21042	-1.72748	-1.13359	0.054173	0.042387	down
TC11000588.hg.1	DNAJC4	NM_005528	"Homo sapiens DnaJ (Hsp40) homolog, subfamily C, member 4 (DNAJC4), mRNA."	RefSeq	4.30177	4.48256	-1.11669	-1.1335	0.163262	0.178875	down
TC21000351.hg.1	LTN1	NM_015565	"Homo sapiens listerin E3 ubiquitin protein ligase 1 (LTN1), mRNA."	RefSeq	2.86887	3.04963	-1.84147	-1.13348	0.045465	0.042387	down
TC16000857.hg.1	EMP2	NM_001424	"Homo sapiens epithelial membrane protein 2 (EMP2), mRNA."	RefSeq	6.06189	6.24262	-2.1582	-1.13346	0.028749	0.026443	down
TC03002076.hg.1	EHHADH	NM_001966	"Homo sapiens enoyl-CoA, hydratase/3-hydroxyacyl CoA dehydrogenase (EHHADH), transcript variant 1, mRNA."	RefSeq	1.78948	1.96989	-1.85641	-1.1332	0.044313	0.042387	down
TC13000843.hg.1	TMTC4	NM_001079669	"Homo sapiens transmembrane and tetratricopeptide repeat containing 4 (TMTC4), transcript variant 2, mRNA."	RefSeq	2.77254	2.95268	-3.09323	-1.13299	0.01057	0.007304	down
TC12003299.hg.1	BLOC1S1	NM_001487	"Homo sapiens biogenesis of lysosomal organelles complex-1, subunit 1 (BLOC1S1), transcript variant 1, mRNA."	RefSeq	3.32349	3.50362	-1.29076	-1.13298	0.116668	0.103127	down
TC10001362.hg.1	PPA1	NM_021129	"Homo sapiens pyrophosphatase (inorganic) 1 (PPA1), mRNA."	RefSeq	6.40605	6.58609	-1.74415	-1.13291	0.052836	0.042387	down
TC19002624.hg.1	ZNF700	NM_144566	"Homo sapiens zinc finger protein 700 (ZNF700), transcript variant 1, mRNA."	RefSeq	3.2996	3.47963	-1.96274	-1.13291	0.037737	0.026443	down
TC10000726.hg.1	FAM178A	NM_001136123	"Homo sapiens family with sequence similarity 178, member A (FAM178A), transcript variant 2, mRNA."	RefSeq	2.3537	2.53367	-1.80448	-1.13286	0.048144	0.042387	down
TC10000331.hg.1	FAM21D	ENST00000311663	cdna:known chromosome:GRCh37:10:51187938:51192032:1 gene:ENSG00000174196 gene_biotype:protein_coding transcript_biotype:protein_coding	ENSEMBL	2.76875	2.9487	-1.74352	-1.13285	0.052887	0.042387	down
TC13000455.hg.1	GJA3	NM_021954	"Homo sapiens gap junction protein, alpha 3, 46kDa (GJA3), mRNA."	RefSeq	1.83869	2.01865	-0.894894	-1.13285	0.254574	0.326898	down
TC07001031.hg.1	ACTR3B	NM_001040135	"Homo sapiens ARP3 actin-related protein 3 homolog B (yeast) (ACTR3B), transcript variant 2, mRNA."	RefSeq	3.54916	3.729	-1.76187	-1.13276	0.051454	0.042387	down
TC14000937.hg.1		ENST00000399979	cdna:novel chromosome:GRCh37:14:23286463:23291750:-1 gene:ENSG00000215306 gene_biotype:protein_coding transcript_biotype:protein_coding	ENSEMBL	5.54298	5.72262	-1.07258	-1.1326	0.178189	0.270995	down
TC06000023.hg.1	RIPK1	NM_003804	"Homo sapiens receptor (TNFRSF)-interacting serine-threonine kinase 1 (RIPK1), mRNA."	RefSeq	2.73074	2.91028	-2.7083	-1.13253	0.015191	0.011282	down
TC10001584.hg.1	COX15	NM_004376	"Homo sapiens cytochrome c oxidase assembly homolog 15 (yeast) (COX15), nuclear gene encoding mitochondrial protein, transcript variant 2, mRNA."	RefSeq	4.05694	4.23645	-1.67176	-1.1325	0.059335	0.064129	down
TC14001508.hg.1	SLC25A29	NM_001039355	"Homo sapiens solute carrier family 25 (mitochondrial carnitine/acylcarnitine carrier), member 29 (SLC25A29), nuclear gene encoding mitochondrial protein, mRNA."	RefSeq	2.39421	2.57371	-3.19437	-1.13249	0.00978	0.00432	down
TC04001116.hg.1	RELL1	NM_001085399	"Homo sapiens RELT-like 1 (RELL1), transcript variant 2, mRNA."	RefSeq	4.74388	4.92326	-1.66003	-1.1324	0.060251	0.064129	down
TC0X000470.hg.1	CSTF2	NM_001325	"Homo sapiens cleavage stimulation factor, 3' pre-RNA, subunit 2, 64kDa (CSTF2), mRNA."	RefSeq	3.37253	3.5519	-2.20222	-1.13239	0.026999	0.026443	down
TC04000701.hg.1	SMARCA5	NM_003601	"Homo sapiens SWI/SNF related, matrix associated, actin dependent regulator of chromatin, subfamily a, member 5 (SMARCA5), mRNA."	RefSeq	6.09121	6.27048	-2.59179	-1.13231	0.017247	0.011282	down
TC09000626.hg.1	OR1K1	NM_080859	"Homo sapiens olfactory receptor, family 1, subfamily K, member 1 (OR1K1), mRNA."	RefSeq	1.60811	1.78736	-0.903837	-1.13229	0.25015	0.326898	down
TC19001676.hg.1	LIG1	NM_000234	"Homo sapiens ligase I, DNA, ATP-dependent (LIG1), mRNA."	RefSeq	3.67633	3.85556	-2.56745	-1.13228	0.017667	0.011282	down
TC16000245.hg.1	POLR3E	NM_018119	"Homo sapiens polymerase (RNA) III (DNA directed) polypeptide E (80kD) (POLR3E), transcript variant 1, mRNA."	RefSeq	3.66505	3.84418	-3.16452	-1.1322	0.010022	0.00432	down
TC14002333.hg.1	JAG2	NM_002226	"Homo sapiens jagged 2 (JAG2), transcript variant 1, mRNA."	RefSeq	3.71676	3.89577	-2.44436	-1.13211	0.02006	0.017021	down
TC0X000222.hg.1	RP2	NM_006915	"Homo sapiens retinitis pigmentosa 2 (X-linked recessive) (RP2), mRNA."	RefSeq	4.27379	4.45279	-1.73753	-1.1321	0.053402	0.042387	down
TC17001753.hg.1	TUBD1	NM_001193609	"Homo sapiens tubulin, delta 1 (TUBD1), transcript variant 2, mRNA."	RefSeq	2.14093	2.31974	-1.98163	-1.13194	0.036712	0.026443	down
TC01003833.hg.1	EPRS	NM_004446	"Homo sapiens glutamyl-prolyl-tRNA synthetase (EPRS), mRNA."	RefSeq	7.52775	7.70655	-1.47769	-1.13194	0.082409	0.064129	down
TC06001944.hg.1	MDN1	NM_014611	"Homo sapiens MDN1, midasin homolog (yeast) (MDN1), mRNA."	RefSeq	2.15556	2.33435	-2.28952	-1.13193	0.023975	0.017021	down
TC04001176.hg.1	TEC	NM_003215	"Homo sapiens tec protein tyrosine kinase (TEC), mRNA."	RefSeq	2.08199	2.26075	-2.61455	-1.13192	0.016725	0.011282	down
TC02001866.hg.1	PNPT1	NM_033109	"Homo sapiens polyribonucleotide nucleotidyltransferase 1 (PNPT1), nuclear gene encoding mitochondrial protein, mRNA."	RefSeq	4.73235	4.91109	-1.78994	-1.13189	0.049239	0.042387	down
TC08001476.hg.1	RNF19A	NM_015435	"Homo sapiens ring finger protein 19A, E3 ubiquitin protein ligase (RNF19A), transcript variant 2, mRNA."	RefSeq	3.26651	3.44522	-2.24797	-1.13188	0.025325	0.017021	down
TC12000762.hg.1	SLC25A3	NM_002635	"Homo sapiens solute carrier family 25 (mitochondrial carrier; phosphate carrier), member 3 (SLC25A3), nuclear gene encoding mitochondrial protein, transcript variant 2, mRNA."	RefSeq	6.16533	6.34402	-2.03937	-1.13186	0.033791	0.026443	down
TC07000403.hg.1	VKORC1L1	NM_173517	"Homo sapiens vitamin K epoxide reductase complex, subunit 1-like 1 (VKORC1L1), mRNA."	RefSeq	4.54167	4.72027	-1.44652	-1.13178	0.087241	0.103127	down
TC10000797.hg.1	ADD3	NM_001121	"Homo sapiens adducin 3 (gamma) (ADD3), transcript variant 3, mRNA."	RefSeq	5.75085	5.92943	-1.58867	-1.13177	0.068195	0.064129	down
TC06000624.hg.1	ENPP4	NM_014936	"Homo sapiens ectonucleotide pyrophosphatase/phosphodiesterase 4 (putative) (ENPP4), mRNA."	RefSeq	2.4435	2.62203	-2.07093	-1.13173	0.03225	0.026443	down
TC19001619.hg.1	PPP1R13L	NM_006663	"Homo sapiens protein phosphatase 1, regulatory subunit 13 like (PPP1R13L), transcript variant 2, mRNA."	RefSeq	3.56457	3.74309	-1.49496	-1.13173	0.080143	0.064129	down
TC02001758.hg.1	DHX57	NM_198963	"Homo sapiens DEAH (Asp-Glu-Ala-Asp/His) box polypeptide 57 (DHX57), mRNA."	RefSeq	2.61269	2.79097	-2.99094	-1.13153	0.011595	0.007304	down
TC05001393.hg.1	ELOVL7	NM_001104558	"Homo sapiens ELOVL fatty acid elongase 7 (ELOVL7), transcript variant 2, mRNA."	RefSeq	2.39389	2.57214	-1.84428	-1.13151	0.045236	0.042387	down
TC01001146.hg.1	PPIAL4E	NM_001144032	"Homo sapiens peptidylprolyl isomerase A (cyclophilin A)-like 4E (PPIAL4E), mRNA."	RefSeq	2.10444	2.28263	-1.94508	-1.13146	0.038647	0.026443	down
TC19001369.hg.1	ZNF675	NM_138330	"Homo sapiens zinc finger protein 675 (ZNF675), mRNA."	RefSeq	1.58496	1.76314	-1.52344	-1.13145	0.076082	0.064129	down
TC0X000979.hg.1	NDP	NM_000266	"Homo sapiens Norrie disease (pseudoglioma) (NDP), mRNA."	RefSeq	1.7264	1.90457	-1.58597	-1.13144	0.068584	0.064129	down
TC0X001259.hg.1	RBM41	NM_001171080	"Homo sapiens RNA binding motif protein 41 (RBM41), transcript variant 2, mRNA."	RefSeq	2.48486	2.66291	-1.9139	-1.13135	0.040627	0.042387	down
TC08000022.hg.1	AGPAT5	NM_018361	"Homo sapiens 1-acylglycerol-3-phosphate O-acyltransferase 5 (AGPAT5), mRNA."	RefSeq	4.93197	5.10975	-1.90149	-1.13115	0.041276	0.042387	down
TC14000973.hg.1	DHRS1	NM_001136050	"Homo sapiens dehydrogenase/reductase (SDR family) member 1 (DHRS1), transcript variant 1, mRNA."	RefSeq	3.05979	3.23748	-2.22755	-1.13107	0.025987	0.017021	down
TC01001585.hg.1	LAMC2	NM_005562	"Homo sapiens laminin, gamma 2 (LAMC2), transcript variant 1, mRNA."	RefSeq	4.97204	5.14961	-1.91947	-1.13097	0.040239	0.042387	down
TC12003292.hg.1	PPHLN1	NM_001143787	"Homo sapiens periphilin 1 (PPHLN1), transcript variant 6, mRNA."	RefSeq	2.41947	2.59703	-3.19673	-1.13097	0.009755	0.00432	down
TC09001601.hg.1	RPL12	NM_000976	"Homo sapiens ribosomal protein L12 (RPL12), mRNA."	RefSeq	8.14499	8.32251	-2.76936	-1.13094	0.014516	0.011282	down
TC22001461.hg.1	SEC14L2	NM_001204204	"Homo sapiens SEC14-like 2 (S. cerevisiae) (SEC14L2), transcript variant 3, mRNA."	RefSeq	1.9095	2.08699	-3.00668	-1.13092	0.011404	0.007304	down
TC03001549.hg.1	EIF4E3	NM_001134651	"Homo sapiens eukaryotic translation initiation factor 4E family member 3 (EIF4E3), transcript variant 1, mRNA."	RefSeq	3.19058	3.36798	-3.22021	-1.13084	0.009475	0.00432	down
TC11001173.hg.1	DCPS	NM_014026	"Homo sapiens decapping enzyme, scavenger (DCPS), mRNA."	RefSeq	5.51853	5.6959	-1.12094	-1.13082	0.161932	0.178875	down
TC01001981.hg.1	SDCCAG8	NM_006642	"Homo sapiens serologically defined colon cancer antigen 8 (SDCCAG8), mRNA."	RefSeq	2.76896	2.94624	-2.74107	-1.13075	0.014803	0.011282	down
TC06001773.hg.1	PLA2G7	NM_001168357	"Homo sapiens phospholipase A2, group VII (platelet-activating factor acetylhydrolase, plasma) (PLA2G7), transcript variant 2, mRNA."	RefSeq	1.99481	2.1719	-2.62414	-1.1306	0.016553	0.011282	down
TC05001317.hg.1	CCL28	NM_148672	"Homo sapiens chemokine (C-C motif) ligand 28 (CCL28), mRNA."	RefSeq	2.11485	2.29176	-2.21064	-1.13046	0.026642	0.026443	down
TC11000283.hg.1	METTL15	NM_152636	"Homo sapiens methyltransferase like 15 (METTL15), transcript variant 2, mRNA."	RefSeq	2.17447	2.35128	-1.56285	-1.13038	0.071391	0.064129	down
TC11000142.hg.1	ZNF215	NM_013250	"Homo sapiens zinc finger protein 215 (ZNF215), mRNA."	RefSeq	2.55076	2.72752	-1.58945	-1.13034	0.0681	0.064129	down
TC09000475.hg.1	ERCC6L2	NM_001010895	"Homo sapiens excision repair cross-complementing rodent repair deficiency, complementation group 6-like 2 (ERCC6L2), mRNA."	RefSeq	2.05861	2.23527	-1.94195	-1.13026	0.038806	0.042387	down
TC02001807.hg.1	SRBD1	NM_018079	"Homo sapiens S1 RNA binding domain 1 (SRBD1), mRNA."	RefSeq	4.45381	4.63046	-2.02603	-1.13026	0.034459	0.026443	down
TC15001457.hg.1	ARPP19	NM_006628	"Homo sapiens cAMP-regulated phosphoprotein, 19kDa (ARPP19), mRNA."	RefSeq	6.70728	6.88379	-1.56149	-1.13015	0.071563	0.064129	down
TC06000628.hg.1	SLC25A27	NM_001204051	"Homo sapiens solute carrier family 25, member 27 (SLC25A27), nuclear gene encoding mitochondrial protein, transcript variant 2, mRNA."	RefSeq	2.72149	2.8979	-1.97877	-1.13007	0.036884	0.026443	down
TC10000695.hg.1	PGAM1	NM_002629	"Homo sapiens phosphoglycerate mutase 1 (brain) (PGAM1), mRNA."	RefSeq	6.15764	6.33404	-1.84159	-1.13006	0.045452	0.042387	down
TC01003392.hg.1	TAGLN2	NM_003564	"Homo sapiens transgelin 2 (TAGLN2), transcript variant 2, mRNA."	RefSeq	5.01412	5.1905	-3.28651	-1.13004	0.009036	0.00432	down
TC13000689.hg.1	VPS36	NM_016075	"Homo sapiens vacuolar protein sorting 36 homolog (S. cerevisiae) (VPS36), mRNA."	RefSeq	3.48402	3.66024	-1.69667	-1.12992	0.056801	0.042387	down
TC05001742.hg.1	ALDH7A1	NM_001182	"Homo sapiens aldehyde dehydrogenase 7 family, member A1 (ALDH7A1), nuclear gene encoding mitochondrial protein, transcript variant 1, mRNA."	RefSeq	4.53054	4.70643	-3.98518	-1.12967	0.005255	0.001624	down
TC16000223.hg.1	ACSM3	NM_202000	"Homo sapiens acyl-CoA synthetase medium-chain family member 3 (ACSM3), transcript variant 2, mRNA."	RefSeq	1.94544	2.12133	-2.71454	-1.12966	0.015121	0.011282	down
TC19000781.hg.1	ZNF175	NM_007147	"Homo sapiens zinc finger protein 175 (ZNF175), mRNA."	RefSeq	2.20112	2.37693	-1.73467	-1.1296	0.05367	0.042387	down
TC10000836.hg.1	FAM160B1	NM_001135051	"Homo sapiens family with sequence similarity 160, member B1 (FAM160B1), transcript variant 2, mRNA."	RefSeq	4.38344	4.55925	-2.49718	-1.1296	0.019023	0.017021	down
TC03002053.hg.1	MCCC1	NM_020166	"Homo sapiens methylcrotonoyl-CoA carboxylase 1 (alpha) (MCCC1), nuclear gene encoding mitochondrial protein, mRNA."	RefSeq	2.48383	2.65953	-3.35683	-1.12951	0.008501	0.00432	down
TC02002615.hg.1	OSGEPL1	NM_022353	"Homo sapiens O-sialoglycoprotein endopeptidase-like 1 (OSGEPL1), mRNA."	RefSeq	1.84276	2.01838	-1.85184	-1.12945	0.044707	0.042387	down
TC20000796.hg.1	UQCC	NM_001184977	"Homo sapiens ubiquinol-cytochrome c reductase complex chaperone (UQCC), nuclear gene encoding mitochondrial protein, transcript variant 3, mRNA."	RefSeq	2.80028	2.9759	-2.64088	-1.12945	0.016216	0.011282	down
TC14000326.hg.1	KTN1	NM_001079521	"Homo sapiens kinectin 1 (kinesin receptor) (KTN1), transcript variant 2, mRNA."	RefSeq	5.65878	5.83436	-0.97138	-1.12942	0.217845	0.270995	down
TC17000991.hg.1	TSR1	NM_018128	"Homo sapiens TSR1, 20S rRNA accumulation, homolog (S. cerevisiae) (TSR1), mRNA."	RefSeq	5.16918	5.34467	-2.00234	-1.12935	0.035745	0.026443	down
TC12001082.hg.1	KDM5A	NM_001042603	"Homo sapiens lysine (K)-specific demethylase 5A (KDM5A), mRNA."	RefSeq	3.71274	3.88816	-1.64109	-1.12929	0.062339	0.064129	down
TC15000588.hg.1	SNX1	NM_001242933	"Homo sapiens sorting nexin 1 (SNX1), transcript variant 4, mRNA."	RefSeq	3.18674	3.36215	-2.3899	-1.12929	0.021289	0.017021	down
TC15000328.hg.1	TUBGCP4	NM_014444	"Homo sapiens tubulin, gamma complex associated protein 4 (TUBGCP4), mRNA."	RefSeq	5.36465	5.53999	-2.26482	-1.12923	0.02479	0.017021	down
TC06001002.hg.1	TBPL1	NM_001253676	"Homo sapiens TBP-like 1 (TBPL1), transcript variant 1, mRNA."	RefSeq	3.72479	3.89992	-2.21329	-1.12906	0.026464	0.026443	down
TC22001488.hg.1	NIPSNAP1	NM_001202502	"Homo sapiens nipsnap homolog 1 (C. elegans) (NIPSNAP1), transcript variant 2, mRNA."	RefSeq	5.07917	5.25426	-1.3693	-1.12904	0.100455	0.103127	down
TC04001820.hg.1	SORBS2	NM_001145674	"Homo sapiens sorbin and SH3 domain containing 2 (SORBS2), transcript variant 7, mRNA."	RefSeq	1.67558	1.85068	-2.99288	-1.12904	0.011563	0.007304	down
TC02002425.hg.1	NMI	NM_004688	"Homo sapiens N-myc (and STAT) interactor (NMI), mRNA."	RefSeq	2.10453	2.27961	-1.83292	-1.12902	0.046006	0.042387	down
TC04002939.hg.1	TMEM144	NM_018342	"Homo sapiens transmembrane protein 144 (TMEM144), mRNA."	RefSeq	1.95073	2.12576	-2.56504	-1.12899	0.017693	0.011282	down
TC01003189.hg.1	HIST2H3A	NM_001005464	"Homo sapiens histone cluster 2, H3a (HIST2H3A), mRNA."	RefSeq	5.55425	5.72907	-0.943862	-1.12882	0.23064	0.270995	down
TC11001894.hg.1	ATL3	NM_015459	"Homo sapiens atlastin GTPase 3 (ATL3), mRNA."	RefSeq	3.4795	3.65428	-1.86562	-1.12879	0.043619	0.042387	down
TC06000655.hg.1	EFHC1	NM_001172420	"Homo sapiens EF-hand domain (C-terminal) containing 1 (EFHC1), transcript variant C, mRNA."	RefSeq	2.04118	2.21592	-4.81206	-1.12876	0.003059	0.001369	down
TC05002009.hg.1	C5orf54	NM_022090	"Homo sapiens chromosome 5 open reading frame 54 (C5orf54), mRNA."	RefSeq	1.58872	1.76334	-2.37237	-1.12867	0.02169	0.017021	down
TC02001081.hg.1	UBE2E3	NM_006357	"Homo sapiens ubiquitin-conjugating enzyme E2E 3 (UBE2E3), transcript variant 1, mRNA."	RefSeq	2.57483	2.74943	-4.52524	-1.12865	0.003733	0.001369	down
TC19002648.hg.1	ZNF808	NM_001039886	"Homo sapiens zinc finger protein 808 (ZNF808), mRNA."	RefSeq	3.65751	3.83194	-1.84974	-1.12852	0.044885	0.042387	down
TC08001524.hg.1	EIF3E	NM_001568	"Homo sapiens eukaryotic translation initiation factor 3, subunit E (EIF3E), mRNA."	RefSeq	2.7933	2.9677	-2.25925	-1.1285	0.025	0.017021	down
TC06000605.hg.1	POLH	NM_006502	"Homo sapiens polymerase (DNA directed), eta (POLH), mRNA."	RefSeq	3.18288	3.35726	-2.5766	-1.12848	0.017476	0.011282	down
TC16000050.hg.1	NDUFB10	NM_004548	"Homo sapiens NADH dehydrogenase (ubiquinone) 1 beta subcomplex, 10, 22kDa (NDUFB10), nuclear gene encoding mitochondrial protein, mRNA."	RefSeq	3.21057	3.38481	-1.50136	-1.12837	0.079239	0.064129	down
TC14001189.hg.1	SIX4	NM_017420	"Homo sapiens SIX homeobox 4 (SIX4), mRNA."	RefSeq	2.38793	2.56216	-3.13493	-1.12836	0.010232	0.007304	down
TC6_dbb_hap3000210.hg.1	HLA-DMA	NM_006120	"Homo sapiens major histocompatibility complex, class II, DM alpha (HLA-DMA), mRNA."	RefSeq	2.93107	3.10522	-1.57928	-1.1283	0.069411	0.064129	down
TC21000148.hg.1	CBR1	NM_001757	"Homo sapiens carbonyl reductase 1 (CBR1), mRNA."	RefSeq	2.15982	2.33393	-1.81792	-1.12827	0.047081	0.042387	down
TC11000362.hg.1	TTC17	NM_018259	"Homo sapiens tetratricopeptide repeat domain 17 (TTC17), mRNA."	RefSeq	6.01075	6.18481	-1.40462	-1.12823	0.094173	0.103127	down
TC17000325.hg.1	SUPT6H	NM_003170	"Homo sapiens suppressor of Ty 6 homolog (S. cerevisiae) (SUPT6H), mRNA."	RefSeq	5.95271	6.12675	-1.7041	-1.12822	0.056248	0.042387	down
TC03000548.hg.1	DZIP3	NM_014648	"Homo sapiens DAZ interacting protein 3, zinc finger (DZIP3), mRNA."	RefSeq	1.88765	2.06165	-1.71764	-1.12818	0.055064	0.042387	down
TC02000520.hg.1	PTCD3	NM_017952	"Homo sapiens pentatricopeptide repeat domain 3 (PTCD3), nuclear gene encoding mitochondrial protein, mRNA."	RefSeq	4.30379	4.47766	-2.53973	-1.12808	0.018164	0.011282	down
TC10001144.hg.1	SVIL	NM_003174	"Homo sapiens supervillin (SVIL), transcript variant 1, mRNA."	RefSeq	4.15575	4.32953	-2.77362	-1.128	0.014453	0.011282	down
TC01001077.hg.1	LOC101060698	ENST00000538264	cdna:novel chromosome:GRCh37:1:144339738:144521058:1 gene:ENSG00000231360 gene_biotype:protein_coding transcript_biotype:protein_coding	ENSEMBL	3.7491	3.92285	-1.50313	-1.12799	0.078902	0.064129	down
TC15000638.hg.1	KIF23	NM_004856	"Homo sapiens kinesin family member 23 (KIF23), transcript variant 2, mRNA."	RefSeq	5.99252	6.16624	-2.21052	-1.12796	0.026655	0.026443	down
TC03000844.hg.1	ARHGEF26	NM_001251962	"Homo sapiens Rho guanine nucleotide exchange factor (GEF) 26 (ARHGEF26), transcript variant 1, mRNA."	RefSeq	2.09863	2.27228	-3.00692	-1.1279	0.011397	0.007304	down
TC01006280.hg.1	LAD1	NM_005558	"Homo sapiens ladinin 1 (LAD1), mRNA."	RefSeq	4.67605	4.84966	-1.84322	-1.12788	0.045306	0.042387	down
TC16000215.hg.1	CCP110	NM_001199022	"Homo sapiens centriolar coiled coil protein 110kDa (CCP110), transcript variant 1, mRNA."	RefSeq	2.21806	2.39164	-1.61576	-1.12785	0.065089	0.064129	down
TC06000188.hg.1	BTN3A3	NM_006994	"Homo sapiens butyrophilin, subfamily 3, member A3 (BTN3A3), transcript variant 1, mRNA."	RefSeq	1.65815	1.83172	-1.80662	-1.12784	0.047979	0.042387	down
TC02002217.hg.1	CKAP2L	NM_152515	"Homo sapiens cytoskeleton associated protein 2-like (CKAP2L), mRNA."	RefSeq	3.26012	3.43365	-1.86688	-1.12781	0.043472	0.042387	down
TC02002064.hg.1	RGPD1	NM_001024457	"Homo sapiens RANBP2-like and GRIP domain containing 1 (RGPD1), mRNA."	RefSeq	3.67925	3.85276	-1.74549	-1.1278	0.052715	0.042387	down
TC03001110.hg.1	LRCH3	NM_032773	"Homo sapiens leucine-rich repeats and calponin homology (CH) domain containing 3 (LRCH3), mRNA."	RefSeq	3.30398	3.47747	-2.20776	-1.12778	0.026776	0.026443	down
TC12000096.hg.1	TPI1	NM_000365	"Homo sapiens triosephosphate isomerase 1 (TPI1), transcript variant 1, mRNA."	RefSeq	5.50899	5.68246	-1.92466	-1.12776	0.039952	0.042387	down
TC10001124.hg.1	ANKRD26	NM_001256053	"Homo sapiens ankyrin repeat domain 26 (ANKRD26), transcript variant 2, mRNA."	RefSeq	1.58496	1.75841	-2.90214	-1.12775	0.012677	0.007304	down
TC13000064.hg.1	NUPL1	NM_001008564	"Homo sapiens nucleoporin like 1 (NUPL1), transcript variant 2, mRNA."	RefSeq	5.23035	5.40367	-1.80354	-1.12765	0.048227	0.042387	down
TC19000375.hg.1		ENST00000397190	[retired] cdna:known chromosome:GRCh37:19:19550811:19553580:1 gene:ENSG00000213993 gene_biotype:protein_coding transcript_biotype:protein_coding	ENSEMBL	2.61829	2.79157	-1.84153	-1.12762	0.045458	0.042387	down
TC05000515.hg.1	MAN2A1	NM_002372	"Homo sapiens mannosidase, alpha, class 2A, member 1 (MAN2A1), mRNA."	RefSeq	4.01946	4.19272	-1.85133	-1.1276	0.044745	0.042387	down
TC6_mcf_hap5000211.hg.1	LY6G5B	NM_021221	"Homo sapiens lymphocyte antigen 6 complex, locus G5B (LY6G5B), mRNA."	RefSeq	2.62593	2.79912	-1.62923	-1.12755	0.063555	0.064129	down
TC11000026.hg.1	EPS8L2	NM_022772	"Homo sapiens EPS8-like 2 (EPS8L2), mRNA."	RefSeq	5.31038	5.48348	-2.08434	-1.12748	0.031563	0.026443	down
TC15001278.hg.1	TP53BP1	NM_001141979	"Homo sapiens tumor protein p53 binding protein 1 (TP53BP1), transcript variant 2, mRNA."	RefSeq	2.68561	2.85872	-2.17755	-1.12748	0.028049	0.026443	down
TC06000890.hg.1	KIAA1919	NM_153369	"Homo sapiens KIAA1919 (KIAA1919), mRNA."	RefSeq	2.63196	2.80503	-2.01278	-1.12745	0.035095	0.026443	down
TC10000253.hg.1	ZNF37A	NM_001007094	"Homo sapiens zinc finger protein 37A (ZNF37A), transcript variant 1, mRNA."	RefSeq	2.70289	2.87594	-2.09533	-1.12745	0.031098	0.026443	down
TC08000506.hg.1	ZC2HC1A	NM_016010	"Homo sapiens zinc finger, C2HC-type containing 1A (ZC2HC1A), mRNA."	RefSeq	2.97079	3.14371	-1.9578	-1.12734	0.03796	0.026443	down
TC17000319.hg.1	TMEM97	NM_014573	"Homo sapiens transmembrane protein 97 (TMEM97), mRNA."	RefSeq	3.17892	3.35183	-2.15867	-1.12733	0.028717	0.026443	down
TC02005063.hg.1	BAZ2B	NM_013450	"Homo sapiens bromodomain adjacent to zinc finger domain, 2B (BAZ2B), mRNA."	RefSeq	1.79356	1.96647	-1.59089	-1.12733	0.067966	0.064129	down
TC6_dbb_hap3000048.hg.1	TCF19	NM_001077511	"Homo sapiens transcription factor 19 (TCF19), transcript variant 2, mRNA."	RefSeq	2.5373	2.71016	-1.5363	-1.12729	0.074465	0.064129	down
TC0X000747.hg.1	ZNF275	NM_001080485	"Homo sapiens zinc finger protein 275 (ZNF275), mRNA."	RefSeq	1.98464	2.1574	-3.19696	-1.12721	0.009749	0.00432	down
TC11002165.hg.1	PICALM	NM_001008660	"Homo sapiens phosphatidylinositol binding clathrin assembly protein (PICALM), transcript variant 2, mRNA."	RefSeq	5.90642	6.07915	-2.12502	-1.12719	0.029933	0.026443	down
TC12001636.hg.1	AVIL	NM_006576	"Homo sapiens advillin (AVIL), mRNA."	RefSeq	1.86642	2.03911	-2.91959	-1.12716	0.012403	0.007304	down
TC05002153.hg.1	ZFP62	NM_001172638	"Homo sapiens ZFP62 zinc finger protein (ZFP62), transcript variant 2, mRNA."	RefSeq	2.62088	2.79334	-2.63373	-1.12698	0.016356	0.011282	down
TC17001785.hg.1	CCDC47	NM_020198	"Homo sapiens coiled-coil domain containing 47 (CCDC47), mRNA."	RefSeq	6.38279	6.55525	-1.86402	-1.12698	0.043759	0.042387	down
TC10000152.hg.1	MLLT10	NM_001195626	"Homo sapiens myeloid/lymphoid or mixed-lineage leukemia (trithorax homolog, Drosophila); translocated to, 10 (MLLT10), transcript variant 3, mRNA."	RefSeq	3.74828	3.92072	-1.84793	-1.12696	0.044968	0.042387	down
TC01000526.hg.1	RIMKLA	NM_173642	"Homo sapiens ribosomal modification protein rimK-like family member A (RIMKLA), mRNA."	RefSeq	1.96513	2.13746	-2.04316	-1.12688	0.033542	0.026443	down
TC01000710.hg.1	ATG4C	NM_032852	"Homo sapiens autophagy related 4C, cysteine peptidase (ATG4C), transcript variant 1, mRNA."	RefSeq	2.60956	2.7819	-1.70873	-1.12688	0.055783	0.042387	down
TC6_qbl_hap6000107.hg.1	ZNF311	NM_001010877	"Homo sapiens zinc finger protein 311 (ZNF311), mRNA."	RefSeq	1.90163	2.07381	-1.80131	-1.12676	0.048329	0.042387	down
TC05000818.hg.1	GRPEL2	NM_152407	"Homo sapiens GrpE-like 2, mitochondrial (E. coli) (GRPEL2), nuclear gene encoding mitochondrial protein, mRNA."	RefSeq	4.38138	4.55352	-2.01558	-1.12673	0.034955	0.026443	down
TC19000793.hg.1	ZNF766	NM_001010851	"Homo sapiens zinc finger protein 766 (ZNF766), mRNA."	RefSeq	3.4168	3.58893	-2.70477	-1.12672	0.015248	0.011282	down
TC0Y000053.hg.1	DDX3Y	NM_001122665	"Homo sapiens DEAD (Asp-Glu-Ala-Asp) box polypeptide 3, Y-linked (DDX3Y), transcript variant 1, mRNA."	RefSeq	3.23178	3.40388	-1.85413	-1.1267	0.04451	0.042387	down
TC0X000376.hg.1	KIF4A	NM_012310	"Homo sapiens kinesin family member 4A (KIF4A), mRNA."	RefSeq	4.2054	4.37749	-1.67251	-1.12668	0.059246	0.064129	down
TC22001425.hg.1	APOBEC3B	NM_004900	"Homo sapiens apolipoprotein B mRNA editing enzyme, catalytic polypeptide-like 3B (APOBEC3B), transcript variant 1, mRNA."	RefSeq	7.16532	7.33737	-1.9534	-1.12666	0.038227	0.026443	down
TC01003352.hg.1	MRPL24	NM_024540	"Homo sapiens mitochondrial ribosomal protein L24 (MRPL24), nuclear gene encoding mitochondrial protein, transcript variant 2, mRNA."	RefSeq	3.06898	3.24098	-2.86366	-1.12662	0.013237	0.007304	down
TC11001950.hg.1	EIF1AD	NM_001242481	"Homo sapiens eukaryotic translation initiation factor 1A domain containing (EIF1AD), transcript variant 1, mRNA."	RefSeq	3.05702	3.22902	-1.96492	-1.12661	0.037667	0.026443	down
TC02001304.hg.1	RQCD1	NM_005444	"Homo sapiens RCD1 required for cell differentiation1 homolog (S. pombe) (RQCD1), transcript variant 2, mRNA."	RefSeq	4.89297	5.06495	-2.74966	-1.1266	0.014745	0.011282	down
TC07001450.hg.1	ZNF680	NM_001130022	"Homo sapiens zinc finger protein 680 (ZNF680), transcript variant 2, mRNA."	RefSeq	2.94666	3.11849	-1.66739	-1.12649	0.059653	0.064129	down
TC05000715.hg.1	CXXC5	NM_016463	"Homo sapiens CXXC finger protein 5 (CXXC5), mRNA."	RefSeq	5.24347	5.4153	-1.97771	-1.12648	0.036967	0.026443	down
TC13000640.hg.1	ZC3H13	NM_015070	"Homo sapiens zinc finger CCCH-type containing 13 (ZC3H13), mRNA."	RefSeq	3.48289	3.65457	-1.52495	-1.12637	0.075847	0.064129	down
TC6_apd_hap1000118.hg.1	HLA-DMA	NM_006120	"Homo sapiens major histocompatibility complex, class II, DM alpha (HLA-DMA), mRNA."	RefSeq	3.00429	3.17595	-1.53471	-1.12636	0.074631	0.064129	down
TC19001209.hg.1	HOOK2	NM_001100176	"Homo sapiens hook homolog 2 (Drosophila) (HOOK2), transcript variant 2, mRNA."	RefSeq	4.06162	4.23327	-1.38941	-1.12635	0.096852	0.103127	down
TC06001479.hg.1	ZNF311	NM_001010877	"Homo sapiens zinc finger protein 311 (ZNF311), mRNA."	RefSeq	1.98789	2.15944	-1.61246	-1.12627	0.065465	0.064129	down
TC14000371.hg.1	PRKCH	NM_006255	"Homo sapiens protein kinase C, eta (PRKCH), mRNA."	RefSeq	3.27964	3.45118	-2.10347	-1.12626	0.030735	0.026443	down
TC13000892.hg.1	PCID2	NM_001127202	"Homo sapiens PCI domain containing 2 (PCID2), transcript variant 1, mRNA."	RefSeq	3.02407	3.19555	-2.16257	-1.12622	0.028514	0.026443	down
TC14002293.hg.1	KIAA0391	NM_014672	"Homo sapiens KIAA0391 (KIAA0391), transcript variant 1, mRNA."	RefSeq	3.86031	4.0317	-1.94201	-1.12614	0.038787	0.042387	down
TC13001720.hg.1	BIVM	NM_001159596	"Homo sapiens basic, immunoglobulin-like variable motif containing (BIVM), transcript variant 2, mRNA."	RefSeq	2.7676	2.93897	-1.84496	-1.12613	0.045153	0.042387	down
TC16000723.hg.1	LUC7L	NM_018032	"Homo sapiens LUC7-like (S. cerevisiae) (LUC7L), transcript variant 1, mRNA."	RefSeq	3.40167	3.57299	-3.2434	-1.12609	0.009309	0.00432	down
TC07001221.hg.1	HOXA5	NM_019102	"Homo sapiens homeobox A5 (HOXA5), mRNA."	RefSeq	4.97666	5.14793	-2.32564	-1.12605	0.022868	0.017021	down
TC0X000572.hg.1	WDR44	NM_001184965	"Homo sapiens WD repeat domain 44 (WDR44), transcript variant 2, mRNA."	RefSeq	3.19892	3.37015	-2.15472	-1.12602	0.028857	0.026443	down
TC17000848.hg.1	NUP85	NM_024844	"Homo sapiens nucleoporin 85kDa (NUP85), mRNA."	RefSeq	2.59152	2.76274	-2.84238	-1.12601	0.013491	0.007304	down
TC04001478.hg.1	C4orf21	NM_018392	"Homo sapiens chromosome 4 open reading frame 21 (C4orf21), mRNA."	RefSeq	1.61302	1.78421	-2.5022	-1.12599	0.018896	0.011282	down
TC10000670.hg.1	PLCE1	NM_016341	"Homo sapiens phospholipase C, epsilon 1 (PLCE1), transcript variant 1, mRNA."	RefSeq	2.15737	2.32838	-1.80781	-1.12585	0.047871	0.042387	down
TC06001029.hg.1	KIAA1244	NM_020340	"Homo sapiens KIAA1244 (KIAA1244), mRNA."	RefSeq	2.51687	2.68784	-3.17102	-1.12581	0.009952	0.00432	down
TC14000403.hg.1	MPP5	NM_022474	"Homo sapiens membrane protein, palmitoylated 5 (MAGUK p55 subfamily member 5) (MPP5), transcript variant 1, mRNA."	RefSeq	4.33044	4.50137	-2.06489	-1.12578	0.032543	0.026443	down
TC01001817.hg.1	MARK1	NM_018650	"Homo sapiens MAP/microtubule affinity-regulating kinase 1 (MARK1), mRNA."	RefSeq	2.51856	2.68933	-2.23976	-1.12565	0.025579	0.017021	down
TC04002912.hg.1	MOB1B	NM_001244766	"Homo sapiens MOB kinase activator 1B (MOB1B), transcript variant 1, mRNA."	RefSeq	2.42061	2.59117	-1.21075	-1.1255	0.136088	0.178875	down
TC11000170.hg.1	IPO7	NM_006391	"Homo sapiens importin 7 (IPO7), mRNA."	RefSeq	8.45663	8.62684	-1.69961	-1.12522	0.056534	0.042387	down
TC09001048.hg.1	VCP	NM_007126	"Homo sapiens valosin containing protein (VCP), mRNA."	RefSeq	6.83169	7.00189	-1.53319	-1.12522	0.07486	0.064129	down
TC20001020.hg.1	TCFL5	NM_006602	"Homo sapiens transcription factor-like 5 (basic helix-loop-helix) (TCFL5), mRNA."	RefSeq	2.22428	2.39445	-1.66168	-1.12519	0.06013	0.064129	down
TC08000200.hg.1	BNIP3L	NM_004331	"Homo sapiens BCL2/adenovirus E1B 19kDa interacting protein 3-like (BNIP3L), mRNA."	RefSeq	7.25975	7.4299	-2.12788	-1.12518	0.029819	0.026443	down
TC01001567.hg.1		ENST00000457152	cdna:novel chromosome:GRCh37:1:180941695:180949868:1 gene:ENSG00000234237 gene_biotype:protein_coding transcript_biotype:protein_coding	ENSEMBL	10.924	11.0941	-2.65388	-1.12514	0.01605	0.011282	down
TC09000247.hg.1	LOC101060578	ENST00000466582	cdna:known chromosome:GRCh37:9:42687353:42714912:1 gene:ENSG00000215126 gene_biotype:protein_coding transcript_biotype:protein_coding	ENSEMBL	2.52641	2.6965	-1.48522	-1.12513	0.081359	0.064129	down
TC09001566.hg.1	ZBTB6	NM_006626	"Homo sapiens zinc finger and BTB domain containing 6 (ZBTB6), mRNA."	RefSeq	3.20139	3.37146	-1.08533	-1.12512	0.1736	0.178875	down
TC04002921.hg.1	SDAD1	NM_018115	"Homo sapiens SDA1 domain containing 1 (SDAD1), mRNA."	RefSeq	5.06247	5.23254	-1.35332	-1.12511	0.103434	0.103127	down
TC11000919.hg.1	ANKRD49	NM_017704	"Homo sapiens ankyrin repeat domain 49 (ANKRD49), mRNA."	RefSeq	2.12459	2.29461	-1.03813	-1.12508	0.19071	0.270995	down
TC12000848.hg.1	UBE3B	NM_130466	"Homo sapiens ubiquitin protein ligase E3B (UBE3B), transcript variant 1, mRNA."	RefSeq	4.58463	4.75439	-1.63096	-1.12487	0.063421	0.064129	down
TC07003293.hg.1	HILPDA	NM_001098786	"Homo sapiens hypoxia inducible lipid droplet-associated (HILPDA), transcript variant 2, mRNA."	RefSeq	2.76452	2.93427	-1.51708	-1.12487	0.076846	0.064129	down
TC05001788.hg.1	CDKN2AIPNL	NM_080656	"Homo sapiens CDKN2A interacting protein N-terminal like (CDKN2AIPNL), mRNA."	RefSeq	4.61262	4.78235	-1.00123	-1.12485	0.205376	0.270995	down
TC04000547.hg.1	GSTCD	NM_024751	"Homo sapiens glutathione S-transferase, C-terminal domain containing (GSTCD), transcript variant 2, mRNA."	RefSeq	2.95285	3.12257	-2.64983	-1.12485	0.016114	0.011282	down
TC12001829.hg.1	FGD6	NM_018351	"Homo sapiens FYVE, RhoGEF and PH domain containing 6 (FGD6), mRNA."	RefSeq	3.38901	3.55871	-1.36451	-1.12483	0.10141	0.103127	down
TC01000738.hg.1	MIER1	NM_001146113	"Homo sapiens mesoderm induction early response 1 homolog (Xenopus laevis) (MIER1), transcript variant 9, mRNA."	RefSeq	3.05728	3.2269	-1.46536	-1.12476	0.084268	0.103127	down
TC03001713.hg.1	MYLK	NM_053025	"Homo sapiens myosin light chain kinase (MYLK), transcript variant 1, mRNA."	RefSeq	1.68308	1.85263	-2.6622	-1.12471	0.015904	0.011282	down
TC02005027.hg.1	WDR92	NM_138458	"Homo sapiens WD repeat domain 92 (WDR92), transcript variant 1, mRNA."	RefSeq	2.36432	2.53386	-1.86814	-1.1247	0.043377	0.042387	down
TC02001320.hg.1	ANKZF1	NM_018089	"Homo sapiens ankyrin repeat and zinc finger domain containing 1 (ANKZF1), transcript variant 1, mRNA."	RefSeq	2.2846	2.45406	-1.68059	-1.12464	0.058393	0.064129	down
TC17001298.hg.1	SGK494	NM_001174103	"Homo sapiens uncharacterized serine/threonine-protein kinase SgK494 (SGK494), mRNA."	RefSeq	3.40409	3.5735	-2.0501	-1.1246	0.033141	0.026443	down
TC12001880.hg.1	GNPTAB	NM_024312	"Homo sapiens N-acetylglucosamine-1-phosphate transferase, alpha and beta subunits (GNPTAB), mRNA."	RefSeq	3.60742	3.77671	-2.07902	-1.12451	0.031792	0.026443	down
TC12000264.hg.1	ARNTL2	NM_001248002	"Homo sapiens aryl hydrocarbon receptor nuclear translocator-like 2 (ARNTL2), transcript variant 2, mRNA."	RefSeq	3.40289	3.57211	-1.93864	-1.12445	0.038972	0.042387	down
TC11000944.hg.1	ARHGAP42	NM_152432	"Homo sapiens Rho GTPase activating protein 42 (ARHGAP42), mRNA."	RefSeq	3.30946	3.47867	-1.26848	-1.12444	0.121715	0.178875	down
TC02000187.hg.1	WDR43	NM_015131	"Homo sapiens WD repeat domain 43 (WDR43), mRNA."	RefSeq	5.30591	5.47511	-1.44753	-1.12444	0.087088	0.103127	down
TC11000954.hg.1	YAP1	NM_001130145	"Homo sapiens Yes-associated protein 1 (YAP1), transcript variant 1, mRNA."	RefSeq	5.43267	5.6018	-2.12401	-1.12438	0.029965	0.026443	down
TC04001459.hg.1	LEF1	NM_001130714	"Homo sapiens lymphoid enhancer-binding factor 1 (LEF1), transcript variant 3, mRNA."	RefSeq	3.30062	3.46969	-2.01887	-1.12434	0.034809	0.026443	down
TC02000263.hg.1	MTA3	NM_020744	"Homo sapiens metastasis associated 1 family, member 3 (MTA3), mRNA."	RefSeq	2.83136	3.00033	-2.68688	-1.12426	0.015452	0.011282	down
TC0X000114.hg.1	EIF2S3	NM_001415	"Homo sapiens eukaryotic translation initiation factor 2, subunit 3 gamma, 52kDa (EIF2S3), mRNA."	RefSeq	7.58167	7.7506	-2.57685	-1.12423	0.01747	0.011282	down
TC10001188.hg.1	ZNF25	NM_145011	"Homo sapiens zinc finger protein 25 (ZNF25), mRNA."	RefSeq	1.65505	1.82394	-2.43803	-1.1242	0.020201	0.017021	down
TC20000784.hg.1	PIGU	NM_080476	"Homo sapiens phosphatidylinositol glycan anchor biosynthesis, class U (PIGU), mRNA."	RefSeq	5.72695	5.89577	-2.22274	-1.12414	0.02612	0.017021	down
TC12000853.hg.1	TCHP	NM_001143852	"Homo sapiens trichoplein, keratin filament binding (TCHP), transcript variant 2, mRNA."	RefSeq	2.77875	2.94751	-2.27387	-1.12409	0.024516	0.017021	down
TC11000240.hg.1	LDHA	NM_001165414	"Homo sapiens lactate dehydrogenase A (LDHA), transcript variant 3, mRNA."	RefSeq	6.00897	6.17764	-2.50959	-1.12402	0.018743	0.011282	down
TC6_mann_hap4000049.hg.1	TCF19	NM_001077511	"Homo sapiens transcription factor 19 (TCF19), transcript variant 2, mRNA."	RefSeq	2.43298	2.60159	-1.81078	-1.12397	0.047658	0.042387	down
TC6_mcf_hap5000042.hg.1	TCF19	NM_001077511	"Homo sapiens transcription factor 19 (TCF19), transcript variant 2, mRNA."	RefSeq	2.43298	2.60159	-1.81078	-1.12397	0.047658	0.042387	down
TC02004920.hg.1	LRRFIP1	NM_001137550	"Homo sapiens leucine rich repeat (in FLII) interacting protein 1 (LRRFIP1), transcript variant 1, mRNA."	RefSeq	2.77981	2.94828	-2.576	-1.12387	0.017482	0.011282	down
TC11000998.hg.1	SIK2	NM_015191	"Homo sapiens salt-inducible kinase 2 (SIK2), mRNA."	RefSeq	2.93675	3.10521	-1.84056	-1.12386	0.045541	0.042387	down
TC17002900.hg.1	SMARCE1	NM_003079	"Homo sapiens SWI/SNF related, matrix associated, actin dependent regulator of chromatin, subfamily e, member 1 (SMARCE1), mRNA."	RefSeq	3.70823	3.87664	-2.55091	-1.12382	0.017992	0.011282	down
TC04001650.hg.1	TMEM154	NM_152680	"Homo sapiens transmembrane protein 154 (TMEM154), mRNA."	RefSeq	1.77191	1.9402	-1.70303	-1.12372	0.056324	0.042387	down
TC02002211.hg.1	ANAPC1	NM_022662	"Homo sapiens anaphase promoting complex subunit 1 (ANAPC1), mRNA."	RefSeq	4.93987	5.10804	-1.72494	-1.12363	0.05437	0.042387	down
TC06000184.hg.1	BTN3A2	NM_001197246	"Homo sapiens butyrophilin, subfamily 3, member A2 (BTN3A2), transcript variant 2, mRNA."	RefSeq	2.04166	2.20963	-2.21314	-1.12348	0.02647	0.026443	down
TC19000577.hg.1	HNRNPUL1	NM_144732	"Homo sapiens heterogeneous nuclear ribonucleoprotein U-like 1 (HNRNPUL1), transcript variant 4, mRNA."	RefSeq	6.87853	7.0465	-2.03129	-1.12348	0.034198	0.026443	down
TC08001729.hg.1	FAM83H	NM_198488	"Homo sapiens family with sequence similarity 83, member H (FAM83H), mRNA."	RefSeq	4.42302	4.59082	-1.46556	-1.12334	0.084249	0.103127	down
TC0Y000052.hg.1	USP9Y	NM_004654	"Homo sapiens ubiquitin specific peptidase 9, Y-linked (USP9Y), mRNA."	RefSeq	2.35406	2.52178	-1.50071	-1.12328	0.079335	0.064129	down
TC07001910.hg.1	ZC3HAV1	NM_024625	"Homo sapiens zinc finger CCCH-type, antiviral 1 (ZC3HAV1), transcript variant 2, mRNA."	RefSeq	3.5207	3.68829	-1.5827	-1.12318	0.068991	0.064129	down
TC0Y000072.hg.1	EIF1AY	NM_004681	"Homo sapiens eukaryotic translation initiation factor 1A, Y-linked (EIF1AY), mRNA."	RefSeq	2.50328	2.6708	-1.86346	-1.12313	0.043791	0.042387	down
TC19001802.hg.1	ZNF83	NM_001105549	"Homo sapiens zinc finger protein 83 (ZNF83), transcript variant 1, mRNA."	RefSeq	2.83307	3.00057	-1.89596	-1.12312	0.041639	0.042387	down
TC01002580.hg.1	EBNA1BP2	NM_001159936	"Homo sapiens EBNA1 binding protein 2 (EBNA1BP2), transcript variant 1, mRNA."	RefSeq	1.9911	2.15849	-3.17367	-1.12302	0.009927	0.00432	down
TC11002133.hg.1	ALG8	NM_001007027	"Homo sapiens ALG8, alpha-1,3-glucosyltransferase (ALG8), transcript variant 2, mRNA."	RefSeq	5.09736	5.26473	-2.02511	-1.12301	0.034497	0.026443	down
TC14000051.hg.1	PARP2	NM_001042618	"Homo sapiens poly (ADP-ribose) polymerase 2 (PARP2), transcript variant 2, mRNA."	RefSeq	3.78432	3.95154	-3.11673	-1.12289	0.010372	0.007304	down
TC10000145.hg.1	PLXDC2	NM_032812	"Homo sapiens plexin domain containing 2 (PLXDC2), mRNA."	RefSeq	1.58496	1.75214	-2.77919	-1.12286	0.014389	0.011282	down
TC01003949.hg.1	ABCB10	NM_012089	"Homo sapiens ATP-binding cassette, sub-family B (MDR/TAP), member 10 (ABCB10), nuclear gene encoding mitochondrial protein, mRNA."	RefSeq	2.76158	2.92867	-2.1866	-1.12279	0.027712	0.026443	down
TC15000449.hg.1	CCNB2	NM_004701	"Homo sapiens cyclin B2 (CCNB2), mRNA."	RefSeq	5.61589	5.78272	-1.5394	-1.12259	0.074115	0.064129	down
TC10000389.hg.1	REEP3	NM_001001330	"Homo sapiens receptor accessory protein 3 (REEP3), mRNA."	RefSeq	5.68921	5.85597	-2.24261	-1.12253	0.02549	0.017021	down
TC01001927.hg.1	KIAA1804	NM_032435	"Homo sapiens mixed lineage kinase 4 (KIAA1804), mRNA."	RefSeq	3.20981	3.37655	-1.87896	-1.12252	0.042734	0.042387	down
TC0X002316.hg.1	HNRNPH2	NM_001032393	"Homo sapiens heterogeneous nuclear ribonucleoprotein H2 (H') (HNRNPH2), transcript variant 2, mRNA."	RefSeq	6.06862	6.23523	-1.41286	-1.12242	0.093039	0.103127	down
TC02001103.hg.1	GULP1	NM_001252668	"Homo sapiens GULP, engulfment adaptor PTB domain containing 1 (GULP1), transcript variant 2, mRNA."	RefSeq	3.03648	3.20308	-4.07112	-1.12241	0.005032	0.001624	down
TC12001298.hg.1	LDHB	NM_001174097	"Homo sapiens lactate dehydrogenase B (LDHB), transcript variant 2, mRNA."	RefSeq	7.43217	7.59869	-2.8338	-1.12235	0.013568	0.007304	down
TC01003268.hg.1	S100A2	NM_005978	"Homo sapiens S100 calcium binding protein A2 (S100A2), mRNA."	RefSeq	1.89945	2.06588	-2.21653	-1.12227	0.026369	0.026443	down
TC6_ssto_hap7000204.hg.1	DDX39B	NM_004640	"Homo sapiens DEAD (Asp-Glu-Ala-Asp) box polypeptide 39B (DDX39B), transcript variant 1, mRNA."	RefSeq	5.88362	6.05001	-2.81354	-1.12224	0.013873	0.007304	down
TC15000840.hg.1	AEN	NM_022767	"Homo sapiens apoptosis enhancing nuclease (AEN), mRNA."	RefSeq	1.9868	2.15307	-2.43307	-1.12215	0.020321	0.017021	down
TC01003497.hg.1	SLC19A2	NM_006996	"Homo sapiens solute carrier family 19 (thiamine transporter), member 2 (SLC19A2), mRNA."	RefSeq	3.48946	3.65568	-1.59555	-1.12212	0.067387	0.064129	down
TC01002147.hg.1	ICMT	NM_012405	"Homo sapiens isoprenylcysteine carboxyl methyltransferase (ICMT), mRNA."	RefSeq	5.52436	5.69048	-1.9615	-1.12204	0.037788	0.026443	down
TC14001123.hg.1	NIN	NM_020921	"Homo sapiens ninein (GSK3B interacting protein) (NIN), transcript variant 2, mRNA."	RefSeq	2.50524	2.67132	-2.803	-1.122	0.014058	0.011282	down
TC07001206.hg.1	OSBPL3	NM_015550	"Homo sapiens oxysterol binding protein-like 3 (OSBPL3), transcript variant 1, mRNA."	RefSeq	3.28721	3.45316	-2.01626	-1.12191	0.034898	0.026443	down
TC6_ssto_hap7000143.hg.1	VARS	NM_006295	"Homo sapiens valyl-tRNA synthetase (VARS), nuclear gene encoding mitochondrial protein, mRNA."	RefSeq	4.28439	4.45025	-3.09835	-1.12183	0.010525	0.007304	down
TC01003011.hg.1	TRIM33	NM_015906	"Homo sapiens tripartite motif containing 33 (TRIM33), transcript variant a, mRNA."	RefSeq	5.40677	5.57261	-1.37834	-1.12182	0.098666	0.103127	down
TC17001646.hg.1	HOXB8	NM_024016	"Homo sapiens homeobox B8 (HOXB8), mRNA."	RefSeq	4.32217	4.48797	-2.10633	-1.12179	0.030608	0.026443	down
TC12001273.hg.1	WBP11	NM_016312	"Homo sapiens WW domain binding protein 11 (WBP11), mRNA."	RefSeq	6.2784	6.44416	-2.52077	-1.12175	0.018552	0.011282	down
TC03000162.hg.1	CNOT10	NM_015442	"Homo sapiens CCR4-NOT transcription complex, subunit 10 (CNOT10), transcript variant 1, mRNA."	RefSeq	4.29276	4.45848	-1.85754	-1.12172	0.044211	0.042387	down
TC17000984.hg.1	SMYD4	NM_052928	"Homo sapiens SET and MYND domain containing 4 (SMYD4), mRNA."	RefSeq	2.46382	2.62951	-2.64303	-1.1217	0.016171	0.011282	down
TC14000584.hg.1	IFI27	NM_001130080	"Homo sapiens interferon, alpha-inducible protein 27 (IFI27), transcript variant 1, mRNA."	RefSeq	1.67877	1.84444	-2.96903	-1.12169	0.011824	0.007304	down
TC13000652.hg.1	SUCLA2	NM_003850	"Homo sapiens succinate-CoA ligase, ADP-forming, beta subunit (SUCLA2), nuclear gene encoding mitochondrial protein, mRNA."	RefSeq	4.22035	4.386	-2.34007	-1.12167	0.022473	0.017021	down
TC6_ssto_hap7000098.hg.1	ZNF311	NM_001010877	"Homo sapiens zinc finger protein 311 (ZNF311), mRNA."	RefSeq	1.95396	2.11945	-1.70766	-1.12155	0.055878	0.042387	down
TC05003426.hg.1	RAPGEF6	NM_016340	"Homo sapiens Rap guanine nucleotide exchange factor (GEF) 6 (RAPGEF6), transcript variant 2, mRNA."	RefSeq	2.64631	2.81172	-1.66616	-1.12149	0.059825	0.064129	down
TC12001754.hg.1	OSBPL8	NM_001003712	"Homo sapiens oxysterol binding protein-like 8 (OSBPL8), transcript variant 2, mRNA."	RefSeq	5.66769	5.83292	-1.11093	-1.12134	0.165146	0.178875	down
TC19001196.hg.1	ZNF563	NM_145276	"Homo sapiens zinc finger protein 563 (ZNF563), mRNA."	RefSeq	1.58496	1.75002	-2.87085	-1.12121	0.013084	0.007304	down
TC06001089.hg.1	ULBP1	NM_025218	"Homo sapiens UL16 binding protein 1 (ULBP1), mRNA."	RefSeq	5.71302	5.878	-2.10109	-1.12115	0.030869	0.026443	down
TC17001628.hg.1	SCRN2	NM_001145023	"Homo sapiens secernin 2 (SCRN2), transcript variant 2, mRNA."	RefSeq	2.47084	2.63568	-1.92758	-1.12105	0.039768	0.042387	down
TC02000667.hg.1	LIMS1	NM_001193488	"Homo sapiens LIM and senescent cell antigen-like domains 1 (LIMS1), transcript variant 3, mRNA."	RefSeq	4.62294	4.78776	-3.23817	-1.12102	0.00936	0.00432	down
TC04002945.hg.1	HSD17B11	NM_016245	"Homo sapiens hydroxysteroid (17-beta) dehydrogenase 11 (HSD17B11), mRNA."	RefSeq	6.11431	6.27908	-2.34298	-1.12099	0.02239	0.017021	down
TC16000872.hg.1	ZC3H7A	NM_014153	"Homo sapiens zinc finger CCCH-type containing 7A (ZC3H7A), mRNA."	RefSeq	4.48732	4.65205	-1.62975	-1.12096	0.063517	0.064129	down
TC12001941.hg.1	SSH1	NM_001161330	"Homo sapiens slingshot protein phosphatase 1 (SSH1), transcript variant 2, mRNA."	RefSeq	3.23809	3.40274	-2.1071	-1.12089	0.03057	0.026443	down
TC02000925.hg.1	MBD5	NM_018328	"Homo sapiens methyl-CpG binding domain protein 5 (MBD5), mRNA."	RefSeq	1.97585	2.14041	-2.55783	-1.12083	0.017813	0.011282	down
TC12001253.hg.1	MANSC1	NM_018050	"Homo sapiens MANSC domain containing 1 (MANSC1), mRNA."	RefSeq	4.64586	4.81039	-1.68461	-1.1208	0.057973	0.064129	down
TC12000502.hg.1	RPL41	NM_021104	"Homo sapiens ribosomal protein L41 (RPL41), transcript variant 1, mRNA."	RefSeq	6.64851	6.81276	-2.48916	-1.12058	0.019208	0.017021	down
TC03001436.hg.1	VPRBP	NM_001171904	"Homo sapiens Vpr (HIV-1) binding protein (VPRBP), transcript variant 2, mRNA."	RefSeq	4.75586	4.92001	-2.31052	-1.12051	0.023332	0.017021	down
TC01001737.hg.1	CR2	NM_001006658	"Homo sapiens complement component (3d/Epstein Barr virus) receptor 2 (CR2), transcript variant 1, mRNA."	RefSeq	2.73352	2.89766	-3.16853	-1.1205	0.00999	0.00432	down
TC07001340.hg.1	NUDCD3	NM_015332	"Homo sapiens NudC domain containing 3 (NUDCD3), mRNA."	RefSeq	3.07604	3.23992	-3.76357	-1.1203	0.006165	0.002462	down
TC0X002343.hg.1	IDS	NM_000202	"Homo sapiens iduronate 2-sulfatase (IDS), transcript variant 1, mRNA."	RefSeq	4.53174	4.69539	-2.84656	-1.12012	0.013402	0.007304	down
TC11000339.hg.1	TRIM44	NM_017583	"Homo sapiens tripartite motif containing 44 (TRIM44), mRNA."	RefSeq	4.65738	4.82095	-1.94516	-1.12005	0.038635	0.026443	down
TC02004936.hg.1	KIAA1841	NM_032506	"Homo sapiens KIAA1841 (KIAA1841), transcript variant 2, mRNA."	RefSeq	2.03697	2.20034	-1.89343	-1.1199	0.041798	0.042387	down
TC05000086.hg.1	FAM105B	NM_138348	"Homo sapiens family with sequence similarity 105, member B (FAM105B), mRNA."	RefSeq	2.73353	2.89688	-1.94486	-1.11989	0.03866	0.042387	down
TC6_cox_hap2000055.hg.1	TCF19	NM_001077511	"Homo sapiens transcription factor 19 (TCF19), transcript variant 2, mRNA."	RefSeq	2.53232	2.69566	-1.47493	-1.11988	0.082842	0.064129	down
TC18000246.hg.1	TIMM21	NM_014177	"Homo sapiens translocase of inner mitochondrial membrane 21 homolog (yeast) (TIMM21), nuclear gene encoding mitochondrial protein, mRNA."	RefSeq	2.55727	2.7205	-2.29427	-1.11979	0.02381	0.017021	down
TC11001364.hg.1	MRPL17	NM_022061	"Homo sapiens mitochondrial ribosomal protein L17 (MRPL17), nuclear gene encoding mitochondrial protein, mRNA."	RefSeq	3.14788	3.31105	-2.22976	-1.11974	0.02591	0.017021	down
TC11001270.hg.1	C11orf89	ENST00000391480	cdna:known chromosome:GRCh37:11:1910375:1912084:-1 gene:ENSG00000184682 gene_biotype:protein_coding transcript_biotype:protein_coding	ENSEMBL	1.69357	1.85666	-1.11947	-1.11968	0.162428	0.178875	down
TC07002054.hg.1	PAXIP1	NM_007349	"Homo sapiens PAX interacting (with transcription-activation domain) protein 1 (PAXIP1), mRNA."	RefSeq	2.76408	2.92715	-1.988	-1.11967	0.036413	0.026443	down
TC09000925.hg.1	PSIP1	NM_001128217	"Homo sapiens PC4 and SFRS1 interacting protein 1 (PSIP1), transcript variant 3, mRNA."	RefSeq	5.19074	5.35381	-2.07384	-1.11967	0.03211	0.026443	down
TC06001207.hg.1	EXOC2	NM_018303	"Homo sapiens exocyst complex component 2 (EXOC2), transcript variant 1, mRNA."	RefSeq	3.03144	3.19449	-1.65077	-1.11966	0.061308	0.064129	down
TC02000646.hg.1	C2orf49	NM_024093	"Homo sapiens chromosome 2 open reading frame 49 (C2orf49), mRNA."	RefSeq	3.11333	3.27635	-2.59688	-1.11963	0.017081	0.011282	down
TC06001147.hg.1	ACAT2	NM_005891	"Homo sapiens acetyl-CoA acetyltransferase 2 (ACAT2), mRNA."	RefSeq	4.51233	4.67526	-1.50922	-1.11956	0.077973	0.064129	down
TC09001170.hg.1	CBWD6	NM_001085457	"Homo sapiens COBW domain containing 6 (CBWD6), mRNA."	RefSeq	3.17963	3.34248	-1.77778	-1.1195	0.050194	0.042387	down
TC08000701.hg.1	MTBP	NM_022045	"Homo sapiens Mdm2, transformed 3T3 cell double minute 2, p53 binding protein (mouse) binding protein, 104kDa (MTBP), mRNA."	RefSeq	1.77089	1.93372	-1.73725	-1.11947	0.053447	0.042387	down
TC02002495.hg.1	TTC21B	NM_024753	"Homo sapiens tetratricopeptide repeat domain 21B (TTC21B), mRNA."	RefSeq	1.82122	1.98405	-2.79522	-1.11947	0.014173	0.011282	down
TC0X001326.hg.1	CUL4B	NM_001079872	"Homo sapiens cullin 4B (CUL4B), transcript variant 2, mRNA."	RefSeq	4.8897	5.05244	-2.12592	-1.11941	0.029857	0.026443	down
TC05001869.hg.1	TAF7	NM_005642	"Homo sapiens TAF7 RNA polymerase II, TATA box binding protein (TBP)-associated factor, 55kDa (TAF7), mRNA."	RefSeq	6.76138	6.92411	-1.9706	-1.1194	0.037317	0.026443	down
TC6_qbl_hap6000223.hg.1	LY6G5B	NM_021221	"Homo sapiens lymphocyte antigen 6 complex, locus G5B (LY6G5B), mRNA."	RefSeq	2.52052	2.68318	-1.50149	-1.11935	0.079217	0.064129	down
TC6_ssto_hap7000197.hg.1	LY6G5B	NM_021221	"Homo sapiens lymphocyte antigen 6 complex, locus G5B (LY6G5B), mRNA."	RefSeq	2.52052	2.68318	-1.50149	-1.11935	0.079217	0.064129	down
TC06002004.hg.1	ZBTB24	NM_001164313	"Homo sapiens zinc finger and BTB domain containing 24 (ZBTB24), transcript variant 2, mRNA."	RefSeq	1.90809	2.07074	-1.46318	-1.11934	0.084593	0.103127	down
TC11001414.hg.1	RNF141	NM_016422	"Homo sapiens ring finger protein 141 (RNF141), mRNA."	RefSeq	4.30531	4.46783	-1.64964	-1.11924	0.061423	0.064129	down
TC6_mcf_hap5000225.hg.1	TAP2	NM_000544	"Homo sapiens transporter 2, ATP-binding cassette, sub-family B (MDR/TAP) (TAP2), transcript variant 1, mRNA."	RefSeq	3.27645	3.43893	-3.09125	-1.11921	0.010589	0.007304	down
TC04001697.hg.1	NAF1	NM_001128931	"Homo sapiens nuclear assembly factor 1 ribonucleoprotein (NAF1), transcript variant 2, mRNA."	RefSeq	2.56333	2.72576	-1.94915	-1.11918	0.038437	0.026443	down
TC15001339.hg.1	SECISBP2L	NM_001193489	"Homo sapiens SECIS binding protein 2-like (SECISBP2L), transcript variant 1, mRNA."	RefSeq	3.43554	3.59798	-1.92612	-1.11918	0.039863	0.042387	down
TC01002381.hg.1	AUNIP	NM_024037	"Homo sapiens aurora kinase A and ninein interacting protein (AUNIP), mRNA."	RefSeq	2.25064	2.41308	-2.4219	-1.11918	0.020532	0.017021	down
TC04000486.hg.1	HERC3	NM_014606	"Homo sapiens HECT and RLD domain containing E3 ubiquitin protein ligase 3 (HERC3), transcript variant 1, mRNA."	RefSeq	2.98043	3.14279	-2.55919	-1.11912	0.017775	0.011282	down
TC05001046.hg.1	RUFY1	NM_001040451	"Homo sapiens RUN and FYVE domain containing 1 (RUFY1), transcript variant 2, mRNA."	RefSeq	2.17687	2.33907	-3.06432	-1.11899	0.010837	0.007304	down
TC02001605.hg.1	SMC6	NM_001142286	"Homo sapiens structural maintenance of chromosomes 6 (SMC6), transcript variant 1, mRNA."	RefSeq	3.61482	3.77696	-1.68835	-1.11895	0.057565	0.064129	down
TC19001804.hg.1	ZNF600	NM_198457	"Homo sapiens zinc finger protein 600 (ZNF600), mRNA."	RefSeq	3.47807	3.64009	-0.683973	-1.11885	0.379889	0.345978	down
TC07001499.hg.1	BAZ1B	NM_032408	"Homo sapiens bromodomain adjacent to zinc finger domain, 1B (BAZ1B), mRNA."	RefSeq	5.4656	5.62758	-1.5145	-1.11882	0.077171	0.064129	down
TC19001259.hg.1	OR10H1	NM_013940	"Homo sapiens olfactory receptor, family 10, subfamily H, member 1 (OR10H1), mRNA."	RefSeq	1.83845	2.0002	-1.00108	-1.11864	0.205465	0.270995	down
TC05000472.hg.1	LNPEP	NM_005575	"Homo sapiens leucyl/cystinyl aminopeptidase (LNPEP), transcript variant 1, mRNA."	RefSeq	4.19847	4.36	-1.27963	-1.11847	0.119201	0.103127	down
TC02000210.hg.1	SPAST	NM_014946	"Homo sapiens spastin (SPAST), transcript variant 1, mRNA."	RefSeq	5.54448	5.70598	-1.81509	-1.11845	0.047304	0.042387	down
TC0X001138.hg.1	RPS4X	NM_001007	"Homo sapiens ribosomal protein S4, X-linked (RPS4X), mRNA."	RefSeq	5.62184	5.78328	-1.95249	-1.1184	0.038278	0.026443	down
TC05000707.hg.1	MATR3	NM_001194954	"Homo sapiens matrin 3 (MATR3), transcript variant 3, mRNA."	RefSeq	5.60985	5.77126	-1.69747	-1.11838	0.056725	0.042387	down
TC08000531.hg.1	CA2	NM_000067	"Homo sapiens carbonic anhydrase II (CA2), mRNA."	RefSeq	2.03706	2.19845	-1.46444	-1.11837	0.084408	0.103127	down
TC07001161.hg.1	ANKMY2	NM_020319	"Homo sapiens ankyrin repeat and MYND domain containing 2 (ANKMY2), mRNA."	RefSeq	3.79803	3.95929	-1.24644	-1.11826	0.126763	0.178875	down
TC20000260.hg.1	PHF20	NM_016436	"Homo sapiens PHD finger protein 20 (PHF20), mRNA."	RefSeq	2.24164	2.40285	-3.84965	-1.11822	0.005796	0.002462	down
TC16000731.hg.1	C16orf13	NM_032366	"Homo sapiens chromosome 16 open reading frame 13 (C16orf13), transcript variant 1, mRNA."	RefSeq	4.20738	4.36852	-0.939702	-1.11817	0.232753	0.270995	down
TC11001450.hg.1	PLEKHA7	NM_175058	"Homo sapiens pleckstrin homology domain containing, family A member 7 (PLEKHA7), mRNA."	RefSeq	2.75165	2.91252	-2.1762	-1.11796	0.028094	0.026443	down
TC03000715.hg.1	DNAJC13	NM_015268	"Homo sapiens DnaJ (Hsp40) homolog, subfamily C, member 13 (DNAJC13), mRNA."	RefSeq	2.83442	2.9952	-1.03917	-1.11789	0.190264	0.270995	down
TC14002229.hg.1	IGHD2-15	ENST00000390578	cdna:known chromosome:GRCh37:14:106363815:106363845:-1 gene:ENSG00000211918 gene_biotype:IG_D_gene transcript_biotype:IG_D_gene	ENSEMBL	2.43098	2.59169	-0.365571	-1.11784	0.642995	0.413695	down
TC12001791.hg.1	CEP290	NM_025114	"Homo sapiens centrosomal protein 290kDa (CEP290), mRNA."	RefSeq	1.66196	1.82266	-1.59029	-1.11783	0.06803	0.064129	down
TC05001664.hg.1	PJA2	NM_014819	"Homo sapiens praja ring finger 2, E3 ubiquitin protein ligase (PJA2), mRNA."	RefSeq	5.73511	5.89563	-2.27055	-1.11769	0.024624	0.017021	down
TC01000730.hg.1	LEPR	NM_001003679	"Homo sapiens leptin receptor (LEPR), transcript variant 3, mRNA."	RefSeq	1.83528	1.99571	-4.22113	-1.11762	0.004561	0.001624	down
TC16001239.hg.1	COG4	NM_001195139	"Homo sapiens component of oligomeric golgi complex 4 (COG4), transcript variant 2, mRNA."	RefSeq	3.35704	3.5172	-1.92787	-1.11742	0.039742	0.042387	down
TC03001364.hg.1	SETD2	NM_014159	"Homo sapiens SET domain containing 2 (SETD2), mRNA."	RefSeq	3.62345	3.78359	-1.4664	-1.1174	0.084128	0.103127	down
TC05001463.hg.1	MRPS27	NM_015084	"Homo sapiens mitochondrial ribosomal protein S27 (MRPS27), nuclear gene encoding mitochondrial protein, mRNA."	RefSeq	4.65103	4.81091	-2.63402	-1.1172	0.016324	0.011282	down
TC13000876.hg.1	CARS2	NM_024537	"Homo sapiens cysteinyl-tRNA synthetase 2, mitochondrial (putative) (CARS2), nuclear gene encoding mitochondrial protein, mRNA."	RefSeq	2.74158	2.90141	-2.08234	-1.11716	0.031652	0.026443	down
TC05000355.hg.1	ARHGEF28	NM_001080479	"Homo sapiens Rho guanine nucleotide exchange factor (GEF) 28 (ARHGEF28), transcript variant 1, mRNA."	RefSeq	1.58496	1.7448	-3.8139	-1.11716	0.005917	0.002462	down
TC04000874.hg.1	NEIL3	NM_018248	"Homo sapiens nei endonuclease VIII-like 3 (E. coli) (NEIL3), mRNA."	RefSeq	3.08718	3.24689	-1.30942	-1.11706	0.112588	0.103127	down
TC02000546.hg.1	RPIA	NM_144563	"Homo sapiens ribose 5-phosphate isomerase A (RPIA), mRNA."	RefSeq	3.25333	3.41295	-1.27476	-1.11699	0.12029	0.103127	down
TC20000681.hg.1	CRNKL1	NM_016652	"Homo sapiens crooked neck pre-mRNA splicing factor-like 1 (Drosophila) (CRNKL1), mRNA."	RefSeq	3.5843	3.7438	-1.51078	-1.1169	0.077801	0.064129	down
TC10000749.hg.1	NOLC1	NM_004741	"Homo sapiens nucleolar and coiled-body phosphoprotein 1 (NOLC1), mRNA."	RefSeq	5.21493	5.3743	-1.78635	-1.1168	0.049481	0.042387	down
TC21000409.hg.1	TMEM50B	NM_006134	"Homo sapiens transmembrane protein 50B (TMEM50B), transcript variant 1, mRNA."	RefSeq	2.34862	2.50796	-2.64502	-1.11677	0.016152	0.011282	down
TC06004099.hg.1	LTV1	NM_032860	"Homo sapiens LTV1 homolog (S. cerevisiae) (LTV1), mRNA."	RefSeq	3.88472	4.04401	-1.29717	-1.11673	0.11514	0.103127	down
TC02001038.hg.1	SCRN3	NM_001193528	"Homo sapiens secernin 3 (SCRN3), transcript variant 2, mRNA."	RefSeq	2.74601	2.90528	-1.64756	-1.11672	0.061671	0.064129	down
TC10000373.hg.1	CDK1	NM_001786	"Homo sapiens cyclin-dependent kinase 1 (CDK1), transcript variant 1, mRNA."	RefSeq	4.47539	4.63464	-1.24686	-1.11671	0.126655	0.178875	down
TC07001258.hg.1	LSM5	NM_001130710	"Homo sapiens LSM5 homolog, U6 small nuclear RNA associated (S. cerevisiae) (LSM5), transcript variant 2, mRNA."	RefSeq	1.94233	2.10148	-2.1807	-1.11663	0.027928	0.026443	down
TC19001703.hg.1	GYS1	NM_001161587	"Homo sapiens glycogen synthase 1 (muscle) (GYS1), transcript variant 2, mRNA."	RefSeq	4.82179	4.98094	-1.15379	-1.11662	0.151728	0.178875	down
TC16001104.hg.1	BRD7	NM_001173984	"Homo sapiens bromodomain containing 7 (BRD7), transcript variant 1, mRNA."	RefSeq	5.72296	5.88209	-1.55095	-1.11661	0.072683	0.064129	down
TC01000484.hg.1	UTP11L	NM_016037	"Homo sapiens UTP11-like, U3 small nucleolar ribonucleoprotein, (yeast) (UTP11L), mRNA."	RefSeq	3.00253	3.16163	-1.66679	-1.11659	0.059761	0.064129	down
TC18000567.hg.1	RTTN	NM_173630	"Homo sapiens rotatin (RTTN), mRNA."	RefSeq	2.29936	2.45811	-2.23735	-1.11632	0.025656	0.017021	down
TC17000924.hg.1	BAIAP2	NM_017450	"Homo sapiens BAI1-associated protein 2 (BAIAP2), transcript variant 1, mRNA."	RefSeq	3.65771	3.81643	-1.90407	-1.1163	0.041187	0.042387	down
TC05000074.hg.1	2017-03-06	NM_005885	"Homo sapiens membrane-associated ring finger (C3HC4) 6, E3 ubiquitin protein ligase (MARCH6), transcript variant 1, mRNA."	RefSeq	6.02973	6.18844	-2.07593	-1.11629	0.031996	0.026443	down
TC05000345.hg.1	TMEM171	NM_001161342	"Homo sapiens transmembrane protein 171 (TMEM171), transcript variant 2, mRNA."	RefSeq	2.06332	2.22194	-2.55907	-1.11622	0.017782	0.011282	down
[truncated: 13,711 more rows]
